# Supplementary material
Source: MDPI journal article supplement (https://www.mdpi.com/2073-4352/11/6/697)

# checkCIF/PLATON report

Structure factors have been supplied for datablock(s) 2

THIS REPORT IS FOR GUIDANCE ONLY. IF USED AS PART OF A REVIEW PROCEDURE FOR PUBLICATION, IT SHOULD NOT REPLACE THE EXPERTISE OF AN EXPERIENCED CRYSTALLOGRAPHIC REFEREE.

No syntax errors found.      CIF dictionary      Interpreting this report

## Datablock: 2

---

|                 |                  |                    |              |
|-----------------|------------------|--------------------|--------------|
| Bond precision: | C-C = 0.0040 Å   | Wavelength=0.71073 |              |
| Cell:           | a=10.3369(5)     | b=9.5051(5)        | c=12.2558(6) |
|                 | alpha=90         | beta=90.203(4)     | gamma=90     |
| Temperature:    | 296 K            |                    |              |
|                 | Calculated       | Reported           |              |
| Volume          | 1204.17(10)      | 1204.17(10)        |              |
| Space group     | P 21/c           | P 21/c             |              |
| Hall group      | -P 2ybc          | -P 2ybc            |              |
| Moiety formula  | C8 H7 Cd N5 O S2 | ?                  |              |
| Sum formula     | C8 H7 Cd N5 O S2 | C8 H7 Cd N5 O S2   |              |
| Mr              | 365.72           | 365.71             |              |
| Dx,g cm-3       | 2.017            | 2.017              |              |
| Z               | 4                | 4                  |              |
| Mu (mm-1)       | 2.149            | 2.149              |              |
| F000            | 712.0            | 712.0              |              |
| F000'           | 709.92           |                    |              |
| h,k,lmax        | 12,11,14         | 12,11,14           |              |
| Nref            | 2128             | 2111               |              |
| Tmin,Tmax       | 0.558,0.898      | 0.604,1.000        |              |
| Tmin'           | 0.438            |                    |              |

Correction method= # Reported T Limits: Tmin=0.604 Tmax=1.000  
AbsCorr = MULTI-SCAN

Data completeness= 0.992      Theta(max)= 24.996

R(reflections)= 0.0225( 1932)      wR2(reflections)= 0.0500( 2111)

S = 1.064      Npar= 163

---

The following ALERTS were generated. Each ALERT has the format

**test-name\_ALERT\_alert-type\_alert-level.**

Click on the hyperlinks for more details of the test.

---

### Alert level B

PLAT910\_ALERT\_3\_B Missing # of FCF Reflection(s) Below Theta(Min). 11 Note

---

### Alert level C

PLAT906\_ALERT\_3\_C Large K Value in the Analysis of Variance ..... 2.317 Check  
PLAT911\_ALERT\_3\_C Missing FCF Refl Between Thmin & STh/L= 0.595 6 Report

---

### Alert level G

PLAT002\_ALERT\_2\_G Number of Distance or Angle Restraints on AtSite 5 Note  
PLAT004\_ALERT\_5\_G Polymeric Structure Found with Maximum Dimension 2 Info  
PLAT172\_ALERT\_4\_G The CIF-Embedded .res File Contains DFIX Records 3 Report  
PLAT230\_ALERT\_2\_G Hirshfeld Test Diff for S1 --C1 . 7.6 s.u.  
PLAT230\_ALERT\_2\_G Hirshfeld Test Diff for N1 --C1 . 7.0 s.u.  
PLAT794\_ALERT\_5\_G Tentative Bond Valency for Cd1 (II) . 2.07 Info  
PLAT860\_ALERT\_3\_G Number of Least-Squares Restraints ..... 3 Note  
PLAT883\_ALERT\_1\_G No Info/Value for \_atom\_sites\_solution\_primary . Please Do !  
PLAT909\_ALERT\_3\_G Percentage of I>2sig(I) Data at Theta(Max) Still 85% Note  
PLAT933\_ALERT\_2\_G Number of OMIT Records in Embedded .res File ... 6 Note  
PLAT941\_ALERT\_3\_G Average HKL Measurement Multiplicity ..... 3.9 Low  
PLAT965\_ALERT\_2\_G The SHELXL WEIGHT Optimisation has not Converged Please Check  
PLAT978\_ALERT\_2\_G Number C-C Bonds with Positive Residual Density. 5 Info

---

0 **ALERT level A** = Most likely a serious problem - resolve or explain  
1 **ALERT level B** = A potentially serious problem, consider carefully  
2 **ALERT level C** = Check. Ensure it is not caused by an omission or oversight  
13 **ALERT level G** = General information/check it is not something unexpected

1 ALERT type 1 CIF construction/syntax error, inconsistent or missing data  
6 ALERT type 2 Indicator that the structure model may be wrong or deficient  
6 ALERT type 3 Indicator that the structure quality may be low  
1 ALERT type 4 Improvement, methodology, query or suggestion  
2 ALERT type 5 Informative message, check

---

## Validation response form

Please find below a validation response form (VRF) that can be filled in and pasted into your CIF.

```
# start Validation Reply Form
_vrf_PLAT910_2
;
PROBLEM: Missing # of FCF Reflection(s) Below Theta(Min). 11 Note
RESPONSE: ...
;
_vrf_PLAT906_2
;
PROBLEM: Large K Value in the Analysis of Variance ..... 2.317 Check
RESPONSE: ...
;
_vrf_PLAT911_2
;
PROBLEM: Missing FCF Refl Between Thmin & STh/L= 0.595 6 Report
RESPONSE: ...
;
# end Validation Reply Form
```

---

It is advisable to attempt to resolve as many as possible of the alerts in all categories. Often the minor alerts point to easily fixed oversights, errors and omissions in your CIF or refinement strategy, so attention to these fine details can be worthwhile. In order to resolve some of the more serious problems it may be necessary to carry out additional measurements or structure refinements. However, the purpose of your study may justify the reported deviations and the more serious of these should normally be commented upon in the discussion or experimental section of a paper or in the "special\_details" fields of the CIF. checkCIF was carefully designed to identify outliers and unusual parameters, but every test has its limitations and alerts that are not important in a particular case may appear. Conversely, the absence of alerts does not guarantee there are no aspects of the results needing attention. It is up to the individual to critically assess their own results and, if necessary, seek expert advice.

### **Publication of your CIF in IUCr journals**

A basic structural check has been run on your CIF. These basic checks will be run on all CIFs submitted for publication in IUCr journals (*Acta Crystallographica*, *Journal of Applied Crystallography*, *Journal of Synchrotron Radiation*); however, if you intend to submit to *Acta Crystallographica Section C* or *E* or *IUCrData*, you should make sure that full publication checks are run on the final version of your CIF prior to submission.

### **Publication of your CIF in other journals**

Please refer to the *Notes for Authors* of the relevant journal for any special instructions relating to CIF submission.

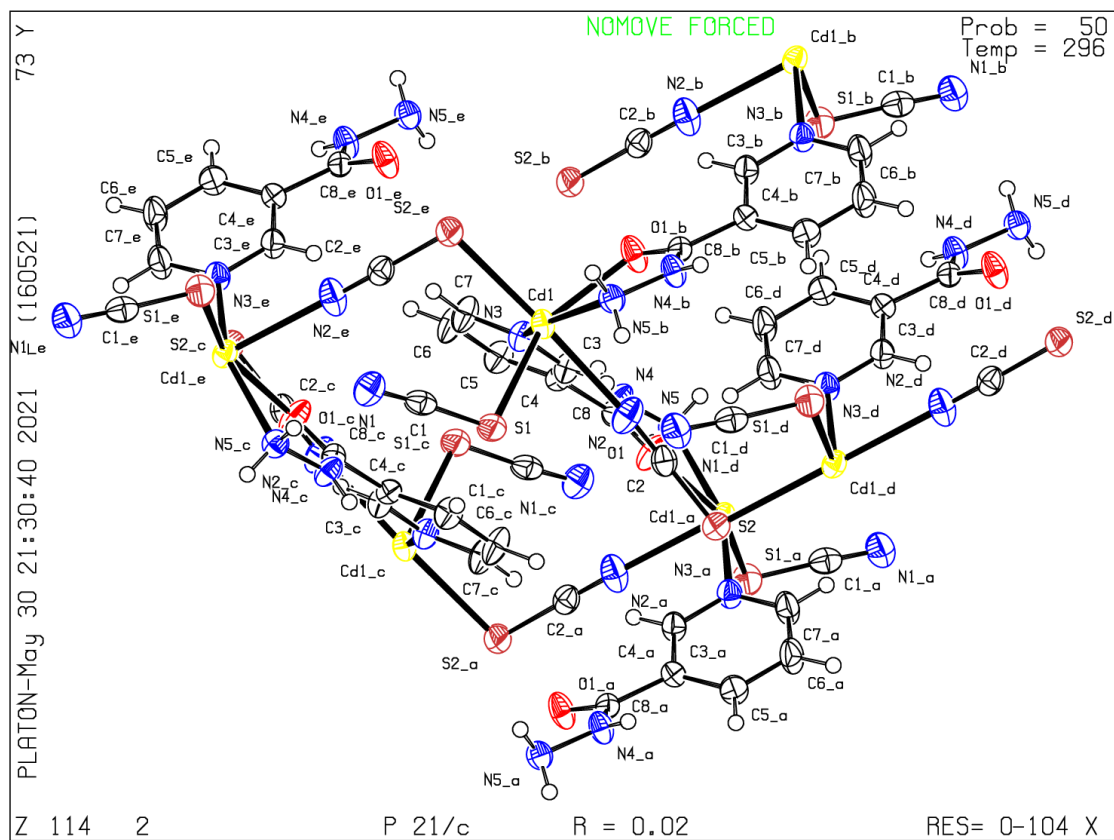

Supplement: s1 [file s1]
