# Supplementary material
Source: MDPI journal article supplement (https://www.mdpi.com/2073-4352/11/6/697)

# Chalcogen S...S Bonding in Supramolecular Assemblies of Cadmium(II) Coordination Polymers with Pyridine-Based Ligands

Nives Matijaković Mlinarić <sup>1</sup>, Nikolina Penić <sup>2</sup>, Boris-Marko Kukovec <sup>3,\*</sup> and Marijana Đaković <sup>4,\*</sup>

<sup>1</sup> Laboratory for Precipitation Processes, Division of Materials Chemistry, Ruđer Bošković Institute, Bijenička Cesta 54, HR-10000 Zagreb, Croatia; Nives.Matijakovic@irb.hr

<sup>2</sup> Division of Experimental Physics, Department of Physics, Faculty of Science, University of Zagreb, Bijenička Cesta 32, HR-10000 Zagreb, Croatia; penic@phy.hr

<sup>3</sup> Department of Physical Chemistry, Faculty of Chemistry and Technology, University of Split, Ruđera Boškovića 35, HR-21000 Split, Croatia

<sup>4</sup> Division of General and Inorganic Chemistry, Department of Chemistry, Faculty of Science, University of Zagreb, Horvatovac 102a, HR-10000 Zagreb, Croatia

\* Correspondence: [bmkukovec@ktf-split.hr](mailto:bmkukovec@ktf-split.hr) (B.-M.K.); [mdjakovic@chem.pmf.hr](mailto:mdjakovic@chem.pmf.hr) (M.Đ.)

## Supplementary Materials

### IR spectra

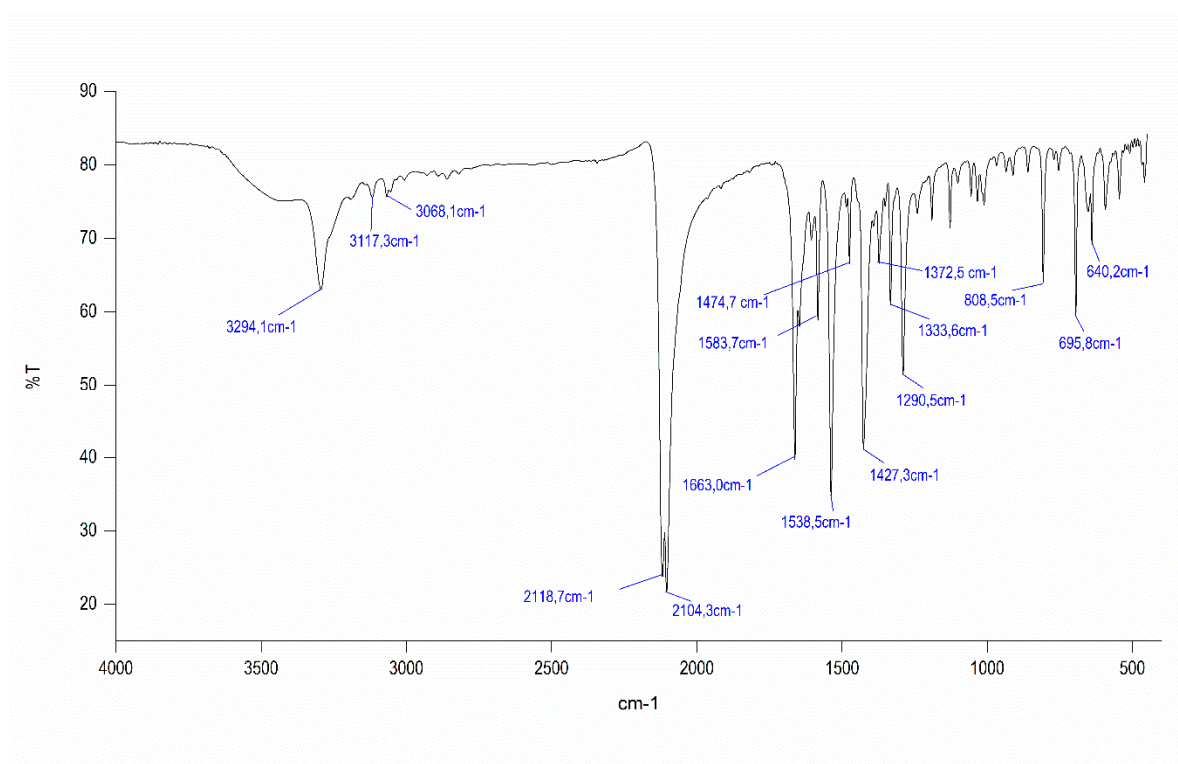

$[\text{Cd}(\text{SCN})_2(3\text{-Acpy})]_n$  (1).

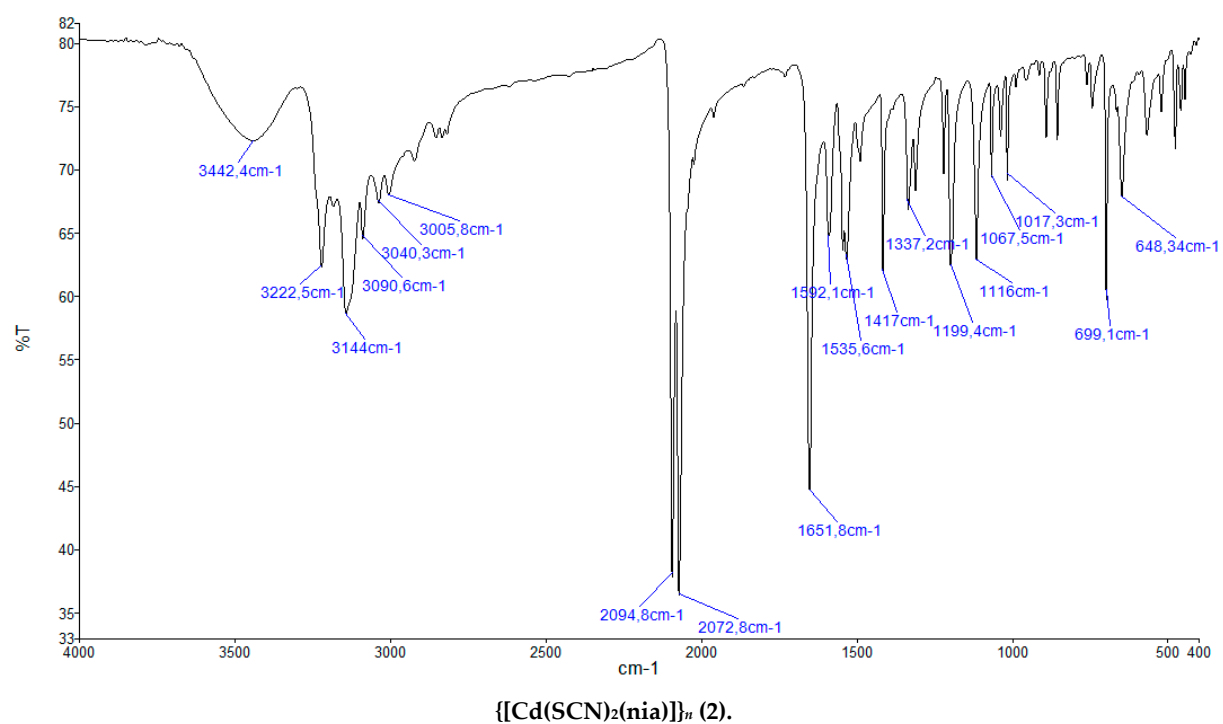

Supplement: s1 [file s1]
