# Supplementary material
Source: MDPI journal article supplement (https://www.mdpi.com/2073-4352/11/6/697)
Supplement: s1 [file s1]

Archive with 5 entries (5 files):
- 1-checkcif.pdf
- 1.cif
- 2-checkcif.pdf
- 2.cif
- Supplemantary materials-revised.pdf
