# Supplementary material
Source: MDPI journal article supplement (https://www.mdpi.com/2073-4352/11/6/697)
Supplement: s1 [file s1 › 1.cif]

 
data_1
 
_audit_creation_method            'SHELXL-2018/3'
_shelx_SHELXL_version_number      '2018/3'
_chemical_name_systematic         ?
_chemical_name_common             ?
_chemical_melting_point           ?
_chemical_formula_moiety          ?
_chemical_formula_sum
 'C9 H8 Cd N4 O S2' 
_chemical_formula_weight          364.71

loop_
 _atom_type_symbol
 _atom_type_description
 _atom_type_scat_dispersion_real
 _atom_type_scat_dispersion_imag
 _atom_type_scat_source
 'C'  'C'   0.0033   0.0016
 'International Tables Vol C Tables 4.2.6.8 and 6.1.1.4'
 'H'  'H'   0.0000   0.0000
 'International Tables Vol C Tables 4.2.6.8 and 6.1.1.4'
 'Cd'  'Cd'  -0.8075   1.2024
 'International Tables Vol C Tables 4.2.6.8 and 6.1.1.4'
 'N'  'N'   0.0061   0.0033
 'International Tables Vol C Tables 4.2.6.8 and 6.1.1.4'
 'O'  'O'   0.0106   0.0060
 'International Tables Vol C Tables 4.2.6.8 and 6.1.1.4'
 'S'  'S'   0.1246   0.1234
 'International Tables Vol C Tables 4.2.6.8 and 6.1.1.4'
 
_space_group_crystal_system       monoclinic
_space_group_IT_number            15
_space_group_name_H-M_alt         'I 2/a'
_space_group_name_Hall            '-I 2ya'
 
_shelx_space_group_comment
;
The symmetry employed for this shelxl refinement is uniquely defined
by the following loop, which should always be used as a source of
symmetry information in preference to the above space-group names.
They are only intended as comments.
;
 
loop_
 _space_group_symop_operation_xyz
 'x, y, z'
 '-x+1/2, y, -z'
 'x+1/2, y+1/2, z+1/2'
 '-x+1, y+1/2, -z+1/2'
 '-x, -y, -z'
 'x-1/2, -y, z'
 '-x+1/2, -y+1/2, -z+1/2'
 'x, -y+1/2, z+1/2'
 
_cell_length_a                    15.427(2)
_cell_length_b                    11.4615(6)
_cell_length_c                    15.7306(17)
_cell_angle_alpha                 90
_cell_angle_beta                  115.734(15)
_cell_angle_gamma                 90
_cell_volume                      2505.6(5)
_cell_formula_units_Z             8
_cell_measurement_temperature     296(2)
_cell_measurement_reflns_used     2322
_cell_measurement_theta_min       4.4260
_cell_measurement_theta_max       31.4250
 
_exptl_crystal_description        'prism'
_exptl_crystal_colour             'colourless'
_exptl_crystal_density_meas       ?
_exptl_crystal_density_method     ?
_exptl_crystal_density_diffrn     1.934          
_exptl_crystal_F_000              1424
_exptl_transmission_factor_min    ?
_exptl_transmission_factor_max    ?
_exptl_crystal_size_max           0.39
_exptl_crystal_size_mid           0.35
_exptl_crystal_size_min           0.31
_exptl_absorpt_coefficient_mu     2.064
_shelx_estimated_absorpt_T_min    ?
_shelx_estimated_absorpt_T_max    ?
_exptl_absorpt_correction_type    'multi-scan'
_exptl_absorpt_correction_T_min   0.73455
_exptl_absorpt_correction_T_max   1.00000
_exptl_absorpt_process_details    
;
CrysAlisPro, Agilent Technologies,
Version 1.171.37.33 (release 27-03-2014 CrysAlis171 .NET)
(compiled Mar 27 2014,17:12:48)
Empirical absorption correction using spherical harmonics,
 implemented in SCALE3 ABSPACK scaling algorithm.
;
_exptl_absorpt_special_details    ?
_diffrn_ambient_temperature       296(2)
_diffrn_radiation_wavelength      0.71073
_diffrn_radiation_type            MoK\a
_diffrn_source                    ?
_diffrn_measurement_device_type   
'Oxford Diffraction Xcalibur2 diffractometer with Sapphire 3 CCD detector'
_diffrn_measurement_method        '\w-scans'
_diffrn_detector_area_resol_mean  ?
_diffrn_reflns_number             4678
_diffrn_reflns_av_unetI/netI      0.0308
_diffrn_reflns_av_R_equivalents   0.0236
_diffrn_reflns_limit_h_min        -14
_diffrn_reflns_limit_h_max        18
_diffrn_reflns_limit_k_min        -12
_diffrn_reflns_limit_k_max        13
_diffrn_reflns_limit_l_min        -18
_diffrn_reflns_limit_l_max        15
_diffrn_reflns_theta_min          4.153
_diffrn_reflns_theta_max          24.999
_diffrn_reflns_theta_full         24.999
_diffrn_measured_fraction_theta_max   0.990
_diffrn_measured_fraction_theta_full  0.990
_diffrn_reflns_Laue_measured_fraction_max    0.990
_diffrn_reflns_Laue_measured_fraction_full   0.990
_diffrn_reflns_point_group_measured_fraction_max   0.990
_diffrn_reflns_point_group_measured_fraction_full  0.990
_reflns_number_total              2182
_reflns_number_gt                 1943
_reflns_threshold_expression      'I > 2\s(I)'
_reflns_Friedel_coverage          0.000
_reflns_Friedel_fraction_max      .
_reflns_Friedel_fraction_full     .
 
_reflns_special_details
;
 Reflections were merged by SHELXL according to the crystal
 class for the calculation of statistics and refinement.
 
 _reflns_Friedel_fraction is defined as the number of unique
 Friedel pairs measured divided by the number that would be
 possible theoretically, ignoring centric projections and
 systematic absences.
;
 
_computing_data_collection        
;
CrysAlisPro, Agilent Technologies,
Version 1.171.37.33 (release 27-03-2014 CrysAlis171 .NET)
(compiled Mar 27 2014,17:12:48)
;
_computing_cell_refinement        
;
CrysAlisPro, Agilent Technologies,
Version 1.171.37.33 (release 27-03-2014 CrysAlis171 .NET)
(compiled Mar 27 2014,17:12:48)
;
_computing_data_reduction         
;
CrysAlisPro, Agilent Technologies,
Version 1.171.37.33 (release 27-03-2014 CrysAlis171 .NET)
(compiled Mar 27 2014,17:12:48)
;
_computing_structure_solution   'SHELXT (Sheldrick, 2015)'
_computing_structure_refinement 'SHELXL-2018/3 (Sheldrick, 2018)'
_computing_molecular_graphics   'MERCURY, Version 2020.2.0 (Macrae et al., 2020)'
_computing_publication_material 'SHELXL-2018/3 (Sheldrick, 2018)'
_refine_special_details           ?
_refine_ls_structure_factor_coef  Fsqd
_refine_ls_matrix_type            full
_refine_ls_weighting_scheme       calc
_refine_ls_weighting_details
'w=1/[\s^2^(Fo^2^)+(0.0354P)^2^+2.9556P] where P=(Fo^2^+2Fc^2^)/3'
_atom_sites_solution_primary      ?
_atom_sites_solution_secondary    ?
_atom_sites_solution_hydrogens    mixed
_refine_ls_hydrogen_treatment     mixed
_refine_ls_extinction_method      none
_refine_ls_extinction_coef        .
_refine_ls_number_reflns          2182
_refine_ls_number_parameters      158
_refine_ls_number_restraints      1
_refine_ls_R_factor_all           0.0335
_refine_ls_R_factor_gt            0.0290
_refine_ls_wR_factor_ref          0.0729
_refine_ls_wR_factor_gt           0.0700
_refine_ls_goodness_of_fit_ref    1.028
_refine_ls_restrained_S_all       1.028
_refine_ls_shift/su_max           0.000
_refine_ls_shift/su_mean          0.000
 
loop_
 _atom_site_label
 _atom_site_type_symbol
 _atom_site_fract_x
 _atom_site_fract_y
 _atom_site_fract_z
 _atom_site_U_iso_or_equiv
 _atom_site_adp_type
 _atom_site_occupancy
 _atom_site_site_symmetry_order  
 _atom_site_calc_flag
 _atom_site_refinement_flags_posn
 _atom_site_refinement_flags_adp
 _atom_site_refinement_flags_occupancy
 _atom_site_disorder_assembly
 _atom_site_disorder_group
Cd1 Cd 0.52811(2) 0.56657(2) 0.24076(2) 0.03835(12) Uani 1 1 d . . . . .
N1 N 0.5456(3) 0.7063(3) 0.3522(2) 0.0552(9) Uani 1 1 d . . . . .
N2 N 0.4727(3) 0.4264(3) 0.3075(2) 0.0512(9) Uani 1 1 d . . . . .
N3 N 0.6823(2) 0.4873(3) 0.3302(2) 0.0424(7) Uani 1 1 d . . . . .
N4 N 0.7852(3) 0.1922(3) 0.3910(3) 0.0531(8) Uani 1 1 d D . . . .
H41 H 0.8431(14) 0.166(4) 0.418(3) 0.064 Uiso 1 1 d D U . . .
O1 O 0.6301(2) 0.1422(3) 0.3387(2) 0.0611(8) Uani 1 1 d . . . . .
S1 S 0.50560(8) 0.92226(8) 0.40947(6) 0.0429(2) Uani 1 1 d . . . . .
S2 S 0.41326(9) 0.21627(8) 0.35353(8) 0.0558(3) Uani 1 1 d . . . . .
C1 C 0.5291(3) 0.7952(3) 0.3748(2) 0.0373(8) Uani 1 1 d . . . . .
C2 C 0.4487(3) 0.3386(3) 0.3250(2) 0.0382(8) Uani 1 1 d . . . . .
C3 C 0.6922(3) 0.3719(4) 0.3317(3) 0.0476(9) Uani 1 1 d . . . . .
H3 H 0.640198 0.327438 0.291349 0.057 Uiso 1 1 calc R U . . .
C4 C 0.7761(3) 0.3148(4) 0.3903(3) 0.0458(9) Uani 1 1 d . . . . .
C5 C 0.8534(3) 0.3809(4) 0.4469(3) 0.0558(10) Uani 1 1 d . . . . .
H5 H 0.911282 0.345322 0.485962 0.067 Uiso 1 1 calc R U . . .
C6 C 0.8449(3) 0.5012(4) 0.4458(3) 0.0600(11) Uani 1 1 d . . . . .
H6 H 0.896764 0.547391 0.484014 0.072 Uiso 1 1 calc R U . . .
C7 C 0.7581(3) 0.5513(4) 0.3871(3) 0.0534(11) Uani 1 1 d . . . . .
H7 H 0.751882 0.632009 0.386987 0.064 Uiso 1 1 calc R U . . .
C8 C 0.7136(3) 0.1121(4) 0.3654(3) 0.0498(10) Uani 1 1 d . . . . .
C9 C 0.7437(3) -0.0115(4) 0.3734(3) 0.0642(12) Uani 1 1 d . . . . .
H9A H 0.702875 -0.057982 0.391747 0.096 Uiso 1 1 calc R U . . .
H9B H 0.809193 -0.018606 0.420101 0.096 Uiso 1 1 calc R U . . .
H9C H 0.738704 -0.038242 0.313607 0.096 Uiso 1 1 calc R U . . .
 
loop_
 _atom_site_aniso_label
 _atom_site_aniso_U_11
 _atom_site_aniso_U_22
 _atom_site_aniso_U_33
 _atom_site_aniso_U_23
 _atom_site_aniso_U_13
 _atom_site_aniso_U_12
Cd1 0.04437(19) 0.02222(17) 0.05002(19) 0.00123(10) 0.02194(14) 0.00116(11)
N1 0.081(3) 0.0304(17) 0.056(2) 0.0013(15) 0.0323(19) 0.0071(18)
N2 0.071(2) 0.0306(18) 0.060(2) -0.0004(14) 0.0359(19) -0.0005(17)
N3 0.0433(18) 0.0306(16) 0.0506(17) 0.0022(14) 0.0179(14) 0.0008(15)
N4 0.0410(19) 0.043(2) 0.071(2) 0.0046(17) 0.0204(17) 0.0044(18)
O1 0.0376(17) 0.0413(16) 0.099(2) 0.0044(15) 0.0245(15) 0.0028(14)
S1 0.0571(6) 0.0313(5) 0.0417(5) -0.0023(4) 0.0227(4) 0.0032(4)
S2 0.0844(8) 0.0275(5) 0.0802(7) -0.0006(5) 0.0589(7) -0.0041(5)
C1 0.046(2) 0.0324(19) 0.0309(16) 0.0038(14) 0.0147(15) -0.0016(17)
C2 0.047(2) 0.0292(19) 0.0422(19) -0.0036(15) 0.0230(17) 0.0003(17)
C3 0.042(2) 0.044(2) 0.049(2) 0.0000(18) 0.0122(17) 0.0008(19)
C4 0.037(2) 0.049(2) 0.046(2) 0.0035(18) 0.0133(16) 0.0053(19)
C5 0.044(2) 0.056(3) 0.059(2) 0.004(2) 0.0135(19) 0.001(2)
C6 0.047(2) 0.062(3) 0.062(2) -0.007(2) 0.015(2) -0.016(2)
C7 0.058(3) 0.047(2) 0.060(2) 0.0038(19) 0.030(2) -0.002(2)
C8 0.043(2) 0.047(2) 0.056(2) 0.0045(19) 0.0190(19) 0.007(2)
C9 0.058(3) 0.047(3) 0.084(3) 0.003(2) 0.028(2) 0.004(2)
 
_geom_special_details
;
 All esds (except the esd in the dihedral angle between two l.s. planes)
 are estimated using the full covariance matrix.  The cell esds are taken
 into account individually in the estimation of esds in distances, angles
 and torsion angles; correlations between esds in cell parameters are only
 used when they are defined by crystal symmetry.  An approximate (isotropic)
 treatment of cell esds is used for estimating esds involving l.s. planes.
;
 
loop_
 _geom_bond_atom_site_label_1
 _geom_bond_atom_site_label_2
 _geom_bond_distance
 _geom_bond_site_symmetry_2
 _geom_bond_publ_flag
Cd1 N2 2.279(3) . ?
Cd1 N1 2.301(3) . ?
Cd1 N3 2.358(3) . ?
Cd1 O1 2.371(3) 4 ?
Cd1 S2 2.6697(10) 4 ?
Cd1 S1 2.7429(10) 4_545 ?
N1 C1 1.144(5) . ?
N2 C2 1.147(4) . ?
N3 C3 1.329(5) . ?
N3 C7 1.340(5) . ?
N4 C8 1.356(5) . ?
N4 C4 1.412(5) . ?
N4 H41 0.861(10) . ?
O1 C8 1.218(5) . ?
S1 C1 1.650(4) . ?
S2 C2 1.636(4) . ?
C3 C4 1.385(5) . ?
C3 H3 0.9300 . ?
C4 C5 1.366(6) . ?
C5 C6 1.384(7) . ?
C5 H5 0.9300 . ?
C6 C7 1.379(6) . ?
C6 H6 0.9300 . ?
C7 H7 0.9300 . ?
C8 C9 1.480(6) . ?
C9 H9A 0.9600 . ?
C9 H9B 0.9600 . ?
C9 H9C 0.9600 . ?
 
loop_
 _geom_angle_atom_site_label_1
 _geom_angle_atom_site_label_2
 _geom_angle_atom_site_label_3
 _geom_angle
 _geom_angle_site_symmetry_1
 _geom_angle_site_symmetry_3
 _geom_angle_publ_flag
N2 Cd1 N1 94.78(12) . . ?
N2 Cd1 N3 86.38(12) . . ?
N1 Cd1 N3 93.41(12) . . ?
N2 Cd1 O1 89.65(12) . 4 ?
N1 Cd1 O1 84.29(12) . 4 ?
N3 Cd1 O1 175.24(11) . 4 ?
N2 Cd1 S2 173.92(9) . 4 ?
N1 Cd1 S2 91.14(9) . 4 ?
N3 Cd1 S2 94.69(8) . 4 ?
O1 Cd1 S2 89.54(8) 4 4 ?
N2 Cd1 S1 90.17(8) . 4_545 ?
N1 Cd1 S1 172.40(9) . 4_545 ?
N3 Cd1 S1 92.65(8) . 4_545 ?
O1 Cd1 S1 89.98(8) 4 4_545 ?
S2 Cd1 S1 83.81(3) 4 4_545 ?
C1 N1 Cd1 152.6(3) . . ?
C2 N2 Cd1 162.6(3) . . ?
C3 N3 C7 118.2(3) . . ?
C3 N3 Cd1 118.2(3) . . ?
C7 N3 Cd1 123.3(3) . . ?
C8 N4 C4 127.3(3) . . ?
C8 N4 H41 116(3) . . ?
C4 N4 H41 116(3) . . ?
C8 O1 Cd1 140.4(3) . 4_545 ?
C1 S1 Cd1 103.52(11) . 4 ?
C2 S2 Cd1 99.45(12) . 4_545 ?
N1 C1 S1 178.8(3) . . ?
N2 C2 S2 177.4(3) . . ?
N3 C3 C4 123.3(4) . . ?
N3 C3 H3 118.3 . . ?
C4 C3 H3 118.3 . . ?
C5 C4 C3 118.1(4) . . ?
C5 C4 N4 119.4(4) . . ?
C3 C4 N4 122.5(4) . . ?
C4 C5 C6 119.5(4) . . ?
C4 C5 H5 120.2 . . ?
C6 C5 H5 120.2 . . ?
C7 C6 C5 118.8(4) . . ?
C7 C6 H6 120.6 . . ?
C5 C6 H6 120.6 . . ?
N3 C7 C6 122.0(4) . . ?
N3 C7 H7 119.0 . . ?
C6 C7 H7 119.0 . . ?
O1 C8 N4 120.9(4) . . ?
O1 C8 C9 123.1(4) . . ?
N4 C8 C9 115.9(4) . . ?
C8 C9 H9A 109.5 . . ?
C8 C9 H9B 109.5 . . ?
H9A C9 H9B 109.5 . . ?
C8 C9 H9C 109.5 . . ?
H9A C9 H9C 109.5 . . ?
H9B C9 H9C 109.5 . . ?
 
loop_
 _geom_torsion_atom_site_label_1
 _geom_torsion_atom_site_label_2
 _geom_torsion_atom_site_label_3
 _geom_torsion_atom_site_label_4
 _geom_torsion
 _geom_torsion_site_symmetry_1
 _geom_torsion_site_symmetry_2
 _geom_torsion_site_symmetry_3
 _geom_torsion_site_symmetry_4
 _geom_torsion_publ_flag
C7 N3 C3 C4 1.3(5) . . . . ?
Cd1 N3 C3 C4 -171.9(3) . . . . ?
N3 C3 C4 C5 -2.3(6) . . . . ?
N3 C3 C4 N4 180.0(4) . . . . ?
C8 N4 C4 C5 157.2(4) . . . . ?
C8 N4 C4 C3 -25.1(6) . . . . ?
C3 C4 C5 C6 1.7(6) . . . . ?
N4 C4 C5 C6 179.4(4) . . . . ?
C4 C5 C6 C7 -0.1(6) . . . . ?
C3 N3 C7 C6 0.4(6) . . . . ?
Cd1 N3 C7 C6 173.3(3) . . . . ?
C5 C6 C7 N3 -1.0(6) . . . . ?
Cd1 O1 C8 N4 164.7(3) 4_545 . . . ?
Cd1 O1 C8 C9 -16.1(7) 4_545 . . . ?
C4 N4 C8 O1 -0.5(7) . . . . ?
C4 N4 C8 C9 -179.8(4) . . . . ?
 
loop_
 _geom_hbond_atom_site_label_D 
 _geom_hbond_atom_site_label_H 
 _geom_hbond_atom_site_label_A 
 _geom_hbond_distance_DH 
 _geom_hbond_distance_HA 
 _geom_hbond_distance_DA 
 _geom_hbond_angle_DHA 
 _geom_hbond_site_symmetry_A 
 _geom_hbond_publ_flag
N4 H41 S1  0.861(10) 2.76(2) 3.536(4) 151(4) 6_665 yes
C3 H3 O1  0.93 2.28 2.821(5) 116.7 . yes
 
_refine_diff_density_max    0.564
_refine_diff_density_min   -0.553
_refine_diff_density_rms    0.075

_shelx_res_file
;
TITL shelxt_a.res in I2/a
    shelx.res
    created by SHELXL-2018/3 at 21:07:00 on 07-May-2021
CELL  0.71073  15.4274  11.4615  15.7306   90.000  115.734   90.000
ZERR     8   0.0022   0.0006   0.0017    0.000    0.015    0.000
LATT   2
SYMM  1/2 - X,   Y, - Z
SFAC  C    H    CD   N    O    S
UNIT  72 64 8 32 8 16
MERG   2
OMIT    -1.00  50.00
OMIT -6   0   6
OMIT -5   4   5
OMIT -7   4   5
OMIT  5   2   1
OMIT -8   0   2
OMIT -7   1   2
OMIT -2   1   5
OMIT  -5   1   6
OMIT 6   0   2
ACTA
TEMP 23
CONF
FMAP   2
PLAN   20
BOND $H
EQIV $3 x+1/2, -y+1, z
HTAB N4 S1_$3
HTAB C3 O1
LIST   6
L.S.  10
DFIX 0.86 0.01 N4 H41
WGHT    0.035400    2.955600
FVAR       2.54347
CD1   3    0.528112    0.566572    0.240764    11.00000    0.04437    0.02222 =
         0.05002    0.00123    0.02194    0.00116
N1    4    0.545618    0.706267    0.352155    11.00000    0.08144    0.03039 =
         0.05632    0.00127    0.03229    0.00711
N2    4    0.472658    0.426423    0.307458    11.00000    0.07085    0.03056 =
         0.06009   -0.00035    0.03591   -0.00047
N3    4    0.682336    0.487254    0.330190    11.00000    0.04334    0.03061 =
         0.05055    0.00216    0.01791    0.00082
N4    4    0.785210    0.192196    0.390966    11.00000    0.04102    0.04288 =
         0.07126    0.00460    0.02044    0.00440
H41   2    0.843122    0.165691    0.417961    11.00000   -1.20000
O1    5    0.630116    0.142188    0.338672    11.00000    0.03760    0.04133 =
         0.09893    0.00435    0.02448    0.00283
S1    6    0.505599    0.922265    0.409465    11.00000    0.05712    0.03130 =
         0.04168   -0.00234    0.02266    0.00323
S2    6    0.413255    0.216267    0.353532    11.00000    0.08439    0.02749 =
         0.08022   -0.00061    0.05889   -0.00412
C1    1    0.529122    0.795199    0.374757    11.00000    0.04646    0.03238 =
         0.03094    0.00383    0.01468   -0.00156
C2    1    0.448666    0.338563    0.325000    11.00000    0.04711    0.02924 =
         0.04220   -0.00357    0.02299    0.00034
C3    1    0.692223    0.371948    0.331696    11.00000    0.04227    0.04354 =
         0.04892    0.00000    0.01217    0.00081
AFIX  43
H3    2    0.640198    0.327438    0.291349    11.00000   -1.20000
AFIX   0
C4    1    0.776080    0.314778    0.390311    11.00000    0.03728    0.04941 =
         0.04575    0.00348    0.01329    0.00529
C5    1    0.853371    0.380887    0.446945    11.00000    0.04358    0.05592 =
         0.05853    0.00399    0.01353    0.00101
AFIX  43
H5    2    0.911282    0.345322    0.485962    11.00000   -1.20000
AFIX   0
C6    1    0.844859    0.501177    0.445829    11.00000    0.04711    0.06181 =
         0.06157   -0.00666    0.01462   -0.01561
AFIX  43
H6    2    0.896764    0.547391    0.484014    11.00000   -1.20000
AFIX   0
C7    1    0.758062    0.551288    0.387103    11.00000    0.05830    0.04674 =
         0.05961    0.00375    0.02977   -0.00242
AFIX  43
H7    2    0.751882    0.632009    0.386987    11.00000   -1.20000
AFIX   0
C8    1    0.713576    0.112100    0.365423    11.00000    0.04319    0.04717 =
         0.05621    0.00452    0.01900    0.00667
C9    1    0.743735   -0.011539    0.373422    11.00000    0.05800    0.04737 =
         0.08450    0.00340    0.02842    0.00441
AFIX 137
H9A   2    0.702875   -0.057982    0.391747    11.00000   -1.50000
H9B   2    0.809193   -0.018606    0.420101    11.00000   -1.50000
H9C   2    0.738704   -0.038242    0.313607    11.00000   -1.50000

AFIX   0
HKLF    4


REM  shelxt_a.res in I2/a
REM wR2 = 0.0729, GooF = S = 1.028, Restrained GooF = 1.028 for all data
REM R1 = 0.0290 for 1943 Fo > 4sig(Fo) and 0.0335 for all 2182 data
REM 158 parameters refined using 1 restraints

END

WGHT      0.0348      3.0452

REM Highest difference peak  0.564,  deepest hole -0.553,  1-sigma level  0.075
Q1    1   0.5325  0.5575  0.2993  11.00000  0.05    0.56
Q2    1   0.5665  0.9346  0.4258  11.00000  0.05    0.56
Q3    1   0.4668  0.5745  0.2083  11.00000  0.05    0.48
Q4    1   0.4162  0.5652  0.2787  11.00000  0.05    0.46
Q5    1   0.6553  0.2301  0.3621  11.00000  0.05    0.44
Q6    1   0.5281  0.5050  0.2319  11.00000  0.05    0.41
Q7    1   0.5273  0.3025  0.2421  11.00000  0.05    0.37
Q8    1   0.7359  0.4694  0.3901  11.00000  0.05    0.36
Q9    1   0.7811  0.3810  0.4293  11.00000  0.05    0.36
Q10   1   0.5245  0.5588  0.1688  11.00000  0.05    0.31
Q11   1   0.7637  0.2513  0.4151  11.00000  0.05    0.31
Q12   1   0.4992  0.2087  0.4012  11.00000  0.05    0.30
Q13   1   0.4211  0.9135  0.3553  11.00000  0.05    0.30
Q14   1   0.8055  0.0596  0.4117  11.00000  0.05    0.29
Q15   1   0.6966  0.0393  0.3545  11.00000  0.05    0.29
Q16   1   0.5272  0.6614  0.2232  11.00000  0.05    0.28
Q17   1   0.9435  0.5822  0.4235  11.00000  0.05    0.27
Q18   1   0.3784  0.2025  0.2924  11.00000  0.05    0.27
Q19   1   0.8625  0.2800  0.3831  11.00000  0.05    0.27
Q20   1   0.4989  0.5072  0.1635  11.00000  0.05    0.26
;
_shelx_res_checksum   88119

_shelx_hkl_file
;
   0   0   4 116472. 1917.27   1
   0   0  -4 119500. 2473.64   3
   0   0  -4 111601. 2464.05   2
   0   0  -6 177614. 3128.80   1
   0   0  -6 184336. 3900.48   3
   0   0   6 183299. 3062.83   1
   0   0  -6 190787. 4015.41   2
   0   0  -8 224172. 5011.31   3
   0   0   8 228421. 3854.32   1
   0   0  -8 236937. 5157.20   2
   0   0 -10 109843. 3430.41   3
   0   0 -10 112509. 3517.90   2
   0   0  10 106233. 2190.24   1
   0   0 -12 64765.2 2756.79   3
   0   0  12 57023.4 1457.77   1
   0   0 -14 22248.6 1759.32   3
   0   0 -16 1929.24 610.513   3
   0   0 -18 2302.80 730.140   3
   0   0 -20 671.130 543.577   3
   0   1  -3 24641.0 805.569   2
   0  -1  -3 25074.6 811.164   2
   0   1   3 25828.8 674.070   1
   0  -1  -3 24745.2 684.529   1
   0   1  -3 25369.3 810.426   3
   0  -1  -5 33313.0 1255.00   3
   0   1   5 35613.8 975.206   1
   0   1  -5 35259.7 1266.84   3
   0   1  -5 34772.7 1303.28   2
   0  -1   5 32683.2 747.137   1
   0  -1  -5 32851.0 1233.03   2
   0   1  -7 24884.0 727.773   1
   0  -1  -7 27437.2 1344.12   2
   0   1   7 27458.2 919.543   1
   0  -1  -7 27251.0 1325.37   3
   0   1  -7 25788.3 1280.27   3
   0  -1   7 25233.3 711.536   1
   0   1  -7 27454.2 1336.05   2
   0  -1   9 103785. 2022.08   1
   0   1  -9 122773. 3459.34   2
   0  -1  -9 115359. 3413.61   2
   0   1  -9 104033. 2107.92   1
   0   1   9 114736. 2386.92   1
   0   1  -9 115147. 3328.21   3
   0  -1  -9 111387. 3341.63   3
   0  -1 -11 22713.3 1530.28   3
   0   1  11 21977.1 891.900   1
   0  -1 -11 23637.9 1577.93   2
   0   1 -11 21546.1 1472.84   3
   0  -1 -13 38120.9 2253.20   3
   0   1 -13 42866.3 2338.17   3
   0   1 -15 11651.7 1365.74   3
   0  -1 -15 13634.9 1427.99   3
   0  -1 -17-98.5058 322.554   3
   0   1 -17 21.4655 297.884   3
   0  -1 -19 7751.14 1282.31   3
   0   1 -19 7329.39 1235.85   3
   0   2   2 179462. 3254.51   1
   0  -2  -2 182647. 3096.21   2
   0   2   2 183915. 3088.67   2
   0  -2  -4 481650. 7855.97   2
   0   2   4 496257. 7711.95   1
   0   2   6 320393. 5502.89   1
   0   2  -6 327330. 6046.90   3
   0  -2  -6 327000. 6027.15   2
   0   2  -6 317268. 4973.09   1
   0  -2  -8 15208.0 1059.05   2
   0  -2  -8 15681.7 1060.99   3
   0   2  -8 11780.3 477.497   1
   0   2  -8 12354.6 965.837   3
   0   2   8 13207.0 723.538   1
   0  -2 -10 8724.72 912.550   3
   0  -2 -10 8592.34 909.491   2
   0   2 -10 7118.91 840.793   3
   0   2  10 7790.79 571.758   1
   0  -2 -12 32163.9 1953.31   2
   0   2  12 28880.2 1198.27   1
   0   2 -12 29556.4 1887.00   3
   0  -2 -12 31125.8 1908.59   3
   0   2 -14 15019.7 1441.87   3
   0  -2 -14 14403.8 1433.10   3
   0   2 -16 850.347 514.025   3
   0  -2 -16 738.082 440.212   3
   0   2 -18 549.515 407.507   3
   0  -2 -18 1023.04 504.166   3
   0  -2 -20 390.909 423.562   3
   0  -3  -1 14550.2 493.686   2
   0   3  -1 14455.3 667.452   1
   0   3   3 11802.3 667.161   1
   0  -3  -3 12073.4 590.376   2
   0  -3  -5 6545.81 550.190   2
   0   3   5 8081.97 598.769   1
   0  -3  -7 21624.9 1180.60   2
   0   3   7 22648.6 1054.15   1
   0  -3  -9 6651.46 768.639   3
   0   3   9 6106.74 556.579   1
   0  -3  -9 6628.52 749.711   2
   0   3  -9 5894.86 354.487   1
   0   3  11 82.2225 172.410   1
   0   3 -11-254.672 300.143   3
   0  -3 -11 372.335 210.466   3
   0  -3 -11 622.738 349.866   2
   0   3  13 2259.78 369.362   1
   0  -3 -13 2735.63 624.869   3
   0  -3 -13 2249.92 577.219   2
   0  -3 -15 5228.75 923.832   3
   0  -3 -17 344.381 327.684   3
   0  -3 -19 303.502 350.206   3
   0   4   0 4887.59 453.534   1
   0   4   2 3988.95 431.119   1
   0   4  -2 4366.57 420.322   1
   0  -4  -2 4617.42 325.959   2
   0  -4  -4 21669.7 932.309   2
   0   4   4 22692.8 1085.67   1
   0  -4  -6 10349.0 781.528   2
   0   4   6 10760.5 777.706   1
   0  -4  -8 3610.17 524.823   2
   0   4   8 4006.32 495.751   1
   0  -4 -10 1460.30 417.122   3
   0   4  10 1520.40 363.840   1
   0  -4 -10 1075.63 366.664   2
   0  -4 -12 4600.73 768.016   3
   0  -4 -12 5079.09 786.152   2
   0   4  12 3868.33 518.169   1
   0  -4 -14 741.870 395.225   2
   0  -4 -14 1334.90 509.949   3
   0  -4 -16 142.572 319.396   3
   0  -4 -18-847.590 489.936   3
   0  -5  -1 2423.75 232.971   2
   0   5  -1 2156.34 347.096   1
   0  -5  -3 737.381 166.393   2
   0   5   3 832.732 256.391   1
   0   5  -3 624.656 181.012   1
   0   5  -5 718.361 196.553   1
   0  -5  -5 956.205 225.476   2
   0   5   5 1015.18 275.417   1
   0   5   7 38186.9 1658.18   1
   0  -5  -7 37399.0 1629.02   2
   0  -5  -9 5595.76 703.467   2
   0   5   9 6494.71 688.660   1
   0   5  -9 5708.62 469.050   1
   0  -5 -11 407.902 280.347   2
   0   5  11 907.313 286.235   1
   0  -5 -11 535.614 330.278   3
   0  -5 -13 8652.16 1141.47   3
   0   5  13 9828.68 883.069   1
   0  -5 -13 9257.88 1122.66   2
   0  -5 -15 9489.60 1297.23   3
   0  -5 -15 9375.98 1219.76   2
   0  -5 -17 359.633 330.940   3
   0  -5 -19 1425.79 610.457   3
   0   6   0 239832. 5041.69   1
   0   6  -2 188686. 4196.59   1
   0   6   2 190722. 4340.81   1
   0  -6  -2 187680. 3463.24   2
   0   6   4 176522. 4220.71   1
   0  -6  -4 174563. 3609.24   2
   0   6  -4 177848. 3959.88   1
   0   6   6 253225. 5498.91   1
   0   6  -6 244483. 4913.56   1
   0  -6  -6 238115. 4989.17   2
   0   6   8 72514.7 2554.61   1
   0  -6  -8 71084.6 2489.77   2
   0   6  -8 70727.6 2104.35   1
   0   6  10 13513.3 1080.18   1
   0  -6 -10 14622.0 1219.94   2
   0  -6 -12 29447.9 2016.52   3
   0  -6 -12 29593.2 1922.32   2
   0   6  12 29221.2 1624.66   1
   0  -6 -14 3588.29 772.391   3
   0   6  14 3365.55 565.667   1
   0  -6 -14 2880.01 678.997   2
   0  -6 -16 306.547 249.958   3
   0  -6 -18 5985.46 1172.75   3
   0  -7  -1 67687.4 1633.76   2
   0   7  -1 65136.8 2317.50   1
   0   7   1 67581.9 2394.47   1
   0  -7  -3 27508.2 1058.63   2
   0   7   3 28494.8 1519.18   1
   0   7  -3 26875.0 1390.61   1
   0   7  -5 324.252 208.254   1
   0  -7  -5 157.842 143.540   2
   0   7   5-7.22564 159.312   1
   0   7   7 23389.1 1473.85   1
   0  -7  -7 24373.4 1323.08   2
   0   7  -7 22730.7 1229.65   1
   0  -7  -9 12858.8 1055.99   2
   0   7   9 11748.9 1059.91   1
   0   7  -9 13198.7 887.907   1
   0   7  11 9111.68 947.220   1
   0  -7 -11 8833.15 993.149   2
   0  -7 -13 26355.4 2046.68   3
   0  -7 -13 23366.1 1798.79   2
   0   7  13 25089.4 1601.57   1
   0  -7 -15 17252.7 1798.15   3
   0  -7 -15 15275.7 1586.13   2
   0  -7 -17 2799.23 837.413   3
   0   8   0 358293. 7337.59   1
   0   8   2 208377. 5059.46   1
   0  -8  -2 202759. 3805.26   2
   0   8  -2 198532. 4845.81   1
   0   8   4 99172.6 3269.49   1
   0   8  -4 97982.0 3045.49   1
   0  -8  -4 97098.2 2468.04   2
   0  -8  -6 216934. 4758.53   2
   0   8  -6 225741. 5108.88   1
   0   8   6 230268. 5634.26   1
   0  -8  -8 107372. 3252.06   2
   0   8  -8 110326. 3174.15   1
   0   8   8 114951. 3722.58   1
   0   8  10 5941.55 821.217   1
   0  -8 -10 7172.91 856.855   2
   0  -8 -12 21137.8 1648.36   2
   0   8  12 21639.0 1577.81   1
   0  -8 -14 10276.4 1382.71   3
   0  -8 -14 12704.5 1392.95   2
   0   8  14 10218.6 1093.05   1
   0  -8 -16 528.314 427.687   3
   0  -8 -18 2358.89 844.013   3
   0   9   1 678.647 303.653   1
   0  -9  -1 529.842 146.052   2
   0   9  -1 481.178 258.582   1
   0  -9  -3 6245.36 508.586   2
   0   9   3 6443.12 818.506   1
   0   9  -3 6726.15 781.641   1
   0   9   5 8857.70 994.440   1
   0   9  -5 8348.12 864.134   1
   0  -9  -5 8705.51 693.219   2
   0   9   7 44087.9 2300.47   1
   0   9  -7 46009.9 2046.58   1
   0  -9  -7 45940.8 1891.82   2
   0  -9  -9 5455.61 707.833   2
   0   9   9 4747.09 740.106   1
   0   9  -9 4026.54 570.266   1
   0   9  11 3332.96 657.020   1
   0  -9 -11 3607.01 667.558   2
   0   9  13 8796.82 1056.97   1
   0  -9 -13 11328.0 1261.86   2
   0  -9 -15 10775.6 1484.05   3
   0  -9 -17 2265.77 798.100   3
   0  10   0 3391.31 614.660   1
   0  10  -2 42327.0 2161.37   1
   0  10   2 43249.1 2247.48   1
   0  10   4 75890.6 3105.61   1
   0  10  -4 70005.9 2809.03   1
   0  10  -6 20689.5 1434.91   1
   0  10   6 19831.8 1600.81   1
   0  10   8 4060.03 739.642   1
   0  10  -8 3696.63 610.799   1
   0  10  10 2615.20 625.066   1
   0  10  12 5567.02 909.035   1
   0  10  14 3327.47 709.258   1
   0 -10 -14 2962.05 804.745   3
   0 -10 -16 179.288 317.668   3
   0  11  -1 14.2448 200.652   1
   0  11   1 63.2154 190.085   1
   0  11   3 5323.53 847.153   1
   0  11  -3 5352.44 772.906   1
   0  11  -5 6761.83 883.779   1
   0  11   5 7079.10 979.057   1
   0  11  -7 2402.72 520.297   1
   0  11   7 1812.93 527.593   1
   0  11   9 1170.24 422.049   1
   0  11  11 2389.00 662.429   1
   0  11  13 882.958 421.373   1
   0 -11 -15-194.780 336.957   3
   0  12   0 3625.09 705.805   1
   0  12  -2 2911.06 645.745   1
   0  12   2 3444.41 713.632   1
   0  12  -4 19255.8 1578.19   1
   0  12   4 17303.2 1618.66   1
   0  12   6 23447.8 1920.42   1
   0  12  -6 23457.9 1708.08   1
   0  12   8 280.103 315.694   1
   0  12  10 897.681 444.100   1
   0  12  12 5091.76 921.831   1
   0  12  14 2863.61 703.463   1
   0  13  -1 3815.16 773.254   1
   0  13   1 4019.85 784.703   1
   0  13   3 1134.64 460.537   1
   0  13  -3 310.421 297.617   1
   0  13  -5 809.025 375.884   1
   0  13   5 806.977 427.124   1
   0  13  -7 3222.09 681.994   1
   0  13   7 3434.02 820.397   1
   0  13   9 3184.93 769.550   1
   0  13  11 748.575 404.349   1
   0  13  13 4920.37 996.490   1
   0  14   0 132240. 4995.51   1
   0  14   2 48387.7 2982.47   1
   0  14  -2 51311.7 2929.53   1
   0  14   4 10862.3 1390.12   1
   0  14  -4 11431.0 1345.15   1
   0  14   6 17643.6 1796.75   1
   0  14  -6 18217.2 1664.46   1
   0  14   8 14847.4 1679.76   1
   0  14  10 13308.8 1599.19   1
   0  15   1 1436.06 504.477   1
   0  15  -1 927.773 468.817   1
   0  15   3 705.381 450.392   1
   0  15  -3 518.167 420.326   1
   0  15   5-178.497 309.503   1
   0  15  -5-244.778 312.611   1
   0  15   7 3756.90 904.040   1
   0  16   0 19545.8 1984.25   1
   0  16   2 17507.3 1918.40   1
   0  16  -2 17903.6 1874.49   1
   0  16  -4 20158.8 1974.24   1
   0  16   4 21654.5 2131.85   1
   1   0 -19 295.410 381.739   3
   1   0 -17 398.372 366.059   3
   1   0 -15 11.1962 245.694   3
   1   0 -13 721.015 440.385   2
   1   0 -13 75.3313 223.078   3
  -1   0  11 125.614 71.7767   1
   1   0 -11 102.089 190.278   3
   1   0  -9-37.4410 190.384   3
   1   0  -9 176.579 197.361   2
  -1   0   9 39.2756 52.9843   1
  -1   0   7 706.035 97.4648   1
   1   0  -7 701.114 218.083   2
   1   0  -7-66.6168 133.229   3
   1   0  -7 34.5391 41.4437   1
   1   0  -5 182.071 121.510   3
   1   0  -5 313.097 153.100   2
   1   0  -5 10.1843 18.8880   1
  -1   0   5 231.917 55.6263   1
   1   0   3 431.735 92.2495   1
  -1   0  -3 339.664 116.018   3
  -1   0  -5 254.610 150.922   2
  -1   0  -5 191.441 145.372   3
   1   0   5 160.264 83.4767   1
   1   0   7 376.111 125.047   1
  -1   0  -7 516.865 210.286   3
   1   0   9 185.992 101.551   1
  -1   0  -9 88.1504 214.412   3
  -1   0 -11 429.356 301.188   3
   1   0  11 93.8664 100.262   1
  -1   0 -13 569.254 357.203   3
  -1   0 -15 205.049 296.915   3
  -1   0 -17 733.292 449.564   3
  -1   0 -19 1265.27 590.172   3
   1  -1 -20 633.610 473.228   3
   1   1 -20 663.174 448.468   3
   1  -1 -18 5423.72 1013.54   3
   1   1 -18 3380.62 789.574   3
   1  -1 -16 2763.41 717.104   3
   1   1 -16 2739.88 692.190   3
   1  -1 -14 991.461 510.612   3
   1  -1 -14 505.642 347.503   2
   1   1 -14 1463.55 532.718   3
   1   1 -12 15488.0 1295.56   3
  -1   1  12 15221.5 693.681   1
   1  -1 -12 15430.8 1290.69   3
   1   1 -12 17382.6 1389.41   2
   1  -1 -12 17894.0 1417.07   2
   1   1 -10 15966.7 1196.54   2
   1   1 -10 14944.2 1144.49   3
   1  -1 -10 12815.0 1097.73   2
  -1   1  10 13554.9 633.666   1
   1  -1 -10 12710.2 1062.34   3
  -1   1   8 1556.50 202.865   1
   1  -1  -8 1100.00 310.635   2
   1   1  -8 1170.38 301.664   3
   1  -1  -8 1399.48 339.842   3
   1   1  -8 1223.63 313.205   2
   1   1  -6 14341.0 853.875   2
   1   1  -6 14143.3 828.548   3
  -1   1   6 14080.3 576.921   1
   1  -1  -6 14659.6 839.157   3
   1  -1  -6 13596.1 836.566   2
   1  -1  -4 351953. 5775.75   3
   1   1  -4 339749. 5756.61   2
  -1   1   4 346404. 5406.83   1
   1  -1  -4 342816. 5811.18   2
  -1   1  -2 2822.88 243.308   3
   1   1   4 89909.4 1881.22   1
  -1  -1  -4 89678.1 2182.38   2
   1  -1   4 85890.9 1697.18   1
  -1   1  -4 82706.1 1697.22   1
  -1   1  -4 84333.8 2112.27   3
  -1  -1  -6 21933.7 1150.63   3
  -1   1  -6 22345.3 1130.20   3
   1  -1   6 21685.4 744.755   1
  -1  -1  -6 21538.3 1142.60   2
   1   1   6 23922.3 885.892   1
  -1   1  -8 10047.4 865.253   3
  -1  -1  -8 11554.8 957.583   3
   1  -1   8 9357.45 509.460   1
   1   1   8 12120.0 657.413   1
  -1  -1  -8 12264.2 982.038   2
  -1  -1 -10 130.919 190.950   3
   1   1  10 356.135 129.668   1
  -1   1 -10 328.306 278.330   3
   1  -1  10 114.573 87.9969   1
  -1  -1 -12 5715.82 842.838   3
   1   1  12 4725.91 463.636   1
  -1   1 -12 5863.41 829.142   3
  -1   1 -14 3995.97 773.348   3
  -1  -1 -14 4176.50 820.128   3
  -1   1 -16 1422.57 577.178   3
  -1  -1 -16 1200.59 514.243   3
  -1  -1 -18 55.1721 459.647   3
  -1   1 -18 105.107 395.016   3
   1  -2 -19-48.4860 419.567   3
   1  -2 -17 264.314 365.056   3
   1   2 -17 665.020 463.158   3
   1  -2 -15 3272.54 706.226   3
   1  -2 -15 3307.99 757.463   2
   1   2 -15 2352.23 641.463   3
   1  -2 -13-33.4897 284.263   3
  -1   2  13 279.421 137.261   1
   1   2 -13 43.3489 279.478   3
   1  -2 -13 430.105 299.100   2
   1  -2 -11 46531.2 2194.45   3
  -1   2  11 44663.3 1450.24   1
   1   2 -11 49588.7 2244.37   3
   1  -2 -11 44035.1 2184.96   2
   1   2  -9 260432. 5608.00   3
   1  -2  -9 238529. 5533.54   2
   1   2  -9 254003. 5561.49   2
   1  -2  -9 255405. 5605.33   3
  -1   2   9 250262. 4588.29   1
   1  -2  -7 43330.4 1670.25   3
   1   2  -7 46958.5 1756.66   3
  -1   2   7 43581.4 1345.12   1
   1  -2  -7 46119.3 1741.43   2
   1   2  -7 44836.0 1698.15   2
   1   2  -5 99267.9 2110.82   2
   1  -2  -5 101921. 2154.73   2
  -1   2   5 101887. 1879.02   1
  -1   2   3 606843. 9223.31   1
   1  -2  -3 601788. 9211.81   2
   1   2  -3 589928. 9103.68   2
  -1  -2  -1 223333. 3258.54   2
   1   2   1 191557. 3205.18   2
  -1  -2  -3 310816. 5341.08   2
   1   2   3 324551. 5387.53   1
  -1   2  -3 321122. 5409.04   3
  -1   2  -5 202135. 4122.19   3
   1   2   5 199350. 3757.90   1
  -1   2  -7 111169. 3066.13   3
  -1  -2  -7 112372. 3096.23   3
  -1  -2  -7 103198. 3000.41   2
   1   2   7 106228. 2520.75   1
  -1  -2  -9 159623. 4300.52   3
   1   2   9 156982. 3408.41   1
  -1   2  -9 165553. 4316.44   3
  -1  -2  -9 154906. 4224.07   2
  -1  -2 -11 49646.1 2461.37   3
   1   2  11 50173.8 1701.04   1
  -1   2 -11 54042.0 2497.67   3
  -1  -2 -11 51479.2 2451.93   2
  -1  -2 -13 3050.56 675.800   3
  -1   2 -13 2124.14 544.681   3
  -1   2 -15 11600.2 1353.54   3
  -1  -2 -15 10100.9 1318.00   3
  -1  -2 -17 3167.62 812.142   3
  -1   2 -17 3726.66 868.137   3
  -1  -2 -19 488.613 414.443   3
   1  -3 -20-13.5969 401.283   3
   1  -3 -18 14693.7 1679.05   3
   1  -3 -16 21368.1 1884.52   3
   1  -3 -16 21706.9 1882.73   2
   1  -3 -14 9507.23 1167.66   3
   1  -3 -14 12375.8 1310.60   2
   1  -3 -12 29392.0 1851.03   2
  -1   3  12 31302.0 1317.05   1
   1  -3 -12 28939.1 1864.93   3
  -1   3  10 28926.3 1238.03   1
   1  -3 -10 27784.7 1582.20   2
   1  -3 -10 29387.2 1647.59   3
   1   3  -8 31253.0 807.145   1
   1   3  -8 34587.5 846.751   1
   1  -3  -8 40487.8 1716.00   3
  -1   3   8 39480.3 1420.05   1
   1  -3  -8 41926.2 1748.19   2
   1   3  -6 270654. 4434.90   1
  -1   3   6 274398. 5078.99   1
   1   3  -4 366397. 5894.11   1
   1  -3  -4 366528. 6262.56   2
  -1   3   2 578.942 147.006   1
  -1  -3   2 197.394 72.0471   2
   1  -3  -2 531.229 130.556   2
   1   3  -2 205.403 110.071   1
   1   3   0 604.968 178.565   1
   1   3   2 8376.54 415.002   2
  -1  -3  -2 7967.35 421.976   2
   1   3   2 9442.20 606.354   1
  -1  -3  -4 60596.1 1701.57   2
   1   3   4 61503.2 1790.76   1
  -1  -3  -6 224.068 174.659   2
   1   3   6 232.943 150.401   1
  -1  -3  -8 203.020 237.863   2
  -1   3  -8 223.204 212.227   3
   1   3   8 152.390 125.011   1
  -1   3 -10 72003.6 2788.50   3
   1   3  10 69083.5 2160.31   1
  -1  -3 -10 71202.5 2839.19   3
  -1  -3 -10 71416.9 2774.93   2
  -1  -3 -12 15942.5 1428.07   3
   1   3  12 14806.4 957.452   1
  -1   3 -12 15408.8 1378.15   3
  -1  -3 -14 88.1923 263.216   3
  -1   3 -14 170.998 278.055   3
  -1  -3 -16 8545.34 1297.46   3
  -1  -3 -18 9112.81 1401.52   3
   1  -4 -19 989.871 516.777   3
   1  -4 -17 2994.65 757.819   3
   1  -4 -17 2524.91 708.527   2
   1  -4 -15 23262.3 1867.25   2
   1  -4 -15 19884.0 1752.24   3
   1  -4 -13 5960.61 900.022   2
  -1   4  13 6081.05 627.844   1
   1  -4 -13 6581.51 920.420   3
  -1   4  11 36692.9 1570.43   1
   1  -4 -11 37093.3 1992.15   2
   1  -4 -11 37486.7 2036.38   3
   1   4  -9 154379. 2796.91   1
  -1   4   9 163732. 3711.75   1
   1  -4  -9 165298. 4182.51   2
   1   4  -9 149636. 2749.84   1
   1   4  -7 129070. 2546.23   1
  -1   4   7 125790. 3089.22   1
   1   4  -5 377439. 6282.00   1
   1  -4  -5 373000. 6626.85   2
  -1   4   5 394908. 6835.81   1
   1   4  -3 783317. 12166.3   1
  -1   4   3 800123. 12510.5   1
   1  -4  -3 796399. 12052.4   2
   1   4  -1 210587. 4062.74   1
  -1  -4  -1 180449. 2929.85   2
   1   4   1 174646. 3664.89   1
   1   4   3 726664. 11396.1   1
  -1  -4  -3 685502. 10713.9   2
  -1  -4  -5 431939. 7604.21   2
   1   4   5 463226. 7878.96   1
  -1  -4  -7 210886. 4728.19   2
   1   4   7 210901. 4522.36   1
  -1  -4  -9 122052. 3639.65   2
   1   4   9 119090. 3155.62   1
  -1  -4 -11 31043.5 1900.54   2
  -1  -4 -11 33612.2 2030.03   3
   1   4  11 31091.5 1498.22   1
   1   4  13 15406.0 1065.95   1
  -1  -4 -13 16208.6 1553.48   3
  -1  -4 -15 33798.6 2408.86   3
  -1  -4 -17 4552.48 975.038   3
  -1  -4 -19-751.550 494.342   3
   1  -5 -20 1483.47 636.525   3
   1  -5 -18 5501.22 1084.71   3
   1  -5 -16 8455.80 1197.91   2
   1  -5 -16 10211.2 1344.18   3
  -1   5  14 5930.92 684.432   1
   1  -5 -14 5363.23 939.557   3
   1  -5 -14 7021.85 1035.35   2
   1  -5 -12 36623.2 2168.47   3
   1  -5 -12 34786.2 2046.05   2
  -1   5  12 39557.0 1761.05   1
  -1   5  10 78007.1 2523.49   1
   1  -5 -10 76264.7 2794.68   2
   1   5 -10 71445.1 1728.83   1
   1  -5  -8 40900.2 1798.98   2
  -1   5   8 44464.8 1826.60   1
   1   5  -8 40112.2 1312.14   1
   1  -5  -6 51340.3 1822.74   2
  -1   5   6 53527.6 1932.47   1
   1   5  -6 52674.8 1616.99   1
   1  -5  -4 8964.07 606.609   2
   1   5  -4 7522.66 587.869   1
  -1   5   4 7844.16 679.689   1
   1  -5  -2 7361.75 477.272   2
  -1   5   2 6181.95 598.518   1
   1   5  -2 7278.63 591.295   1
  -1  -5   0 180568. 2919.10   2
   1   5   0 184666. 3938.00   1
  -1   5   0 186261. 3959.59   1
   1   5   2 16016.7 961.276   1
  -1  -5  -2 16571.7 646.388   2
  -1  -5  -4 47249.6 1517.25   2
   1   5   4 52507.2 1902.97   1
   1   5   6 15816.5 1036.18   1
  -1  -5  -6 14882.7 936.636   2
   1   5   8 86.9562 169.765   1
  -1  -5  -8 18.6449 173.558   2
  -1  -5 -10 20586.9 1445.99   2
   1   5  10 17981.8 1174.11   1
   1   5  12 19813.3 1281.47   1
  -1  -5 -12 20259.6 1688.16   3
  -1  -5 -12 19511.2 1565.38   2
  -1  -5 -14 751.719 434.091   3
  -1  -5 -16 3331.08 820.136   3
  -1  -5 -18 4376.17 1056.66   3
   1  -6 -19 460.099 436.801   3
   1  -6 -17 338.528 363.668   2
   1  -6 -17 1190.85 567.699   3
   1  -6 -15 113.439 327.984   3
   1  -6 -15-198.194 428.326   2
  -1   6  13 677.773 289.678   1
   1  -6 -13 727.614 416.430   3
   1  -6 -13 1086.41 420.451   2
   1  -6 -11 15788.3 1279.36   2
  -1   6  11 17722.8 1238.09   1
   1   6  -9 59262.0 1784.88   1
   1  -6  -9 60694.7 2379.67   2
  -1   6   9 62743.8 2389.24   1
   1   6  -7 69013.3 2048.27   1
   1  -6  -7 68238.5 2282.70   2
  -1   6   7 72005.3 2478.83   1
   1   6  -5 18966.0 1017.21   1
   1  -6  -5 19041.3 996.126   2
  -1   6   5 18388.8 1153.29   1
   1  -6  -3 47396.9 1477.69   2
  -1   6   3 48063.7 1890.94   1
   1   6  -3 46606.5 1729.80   1
   1   6  -1 130495. 3307.91   1
  -1   6   1 134248. 3441.61   1
  -1  -6  -1 184458. 3108.04   2
  -1   6  -1 178207. 4131.63   1
   1   6   1 177525. 4164.89   1
  -1  -6  -3 227331. 4179.67   2
   1   6   3 242152. 5152.84   1
   1   6   5 35621.0 1678.65   1
  -1  -6  -5 32076.4 1327.64   2
   1   6   7 12050.5 986.406   1
  -1  -6  -7 12507.3 940.459   2
  -1  -6  -9 55914.6 2365.62   2
   1   6   9 55981.1 2271.75   1
   1   6  11 38264.0 1898.28   1
  -1  -6 -11 39284.1 2158.02   2
   1   6  13 5932.31 771.855   1
  -1  -6 -13 5979.91 1014.48   3
  -1  -6 -13 7721.51 1040.77   2
  -1  -6 -15-441.681 387.802   3
  -1  -6 -17 759.312 487.498   3
   1  -7 -18 355.734 389.094   3
   1  -7 -16 1716.88 590.021   2
   1  -7 -16 1215.19 462.750   3
   1  -7 -14 1832.73 608.346   3
  -1   7  14 778.778 289.346   1
   1  -7 -14 1285.07 450.915   2
  -1   7  12 162.259 199.349   1
   1  -7 -12 289.797 214.441   2
   1  -7 -10 1087.84 388.264   2
  -1   7  10 2305.12 499.917   1
   1  -7  -8 5028.27 653.155   2
  -1   7   8 3925.18 604.060   1
   1   7  -8 3432.06 461.539   1
   1   7  -6 5178.48 574.105   1
   1  -7  -6 5273.82 572.902   2
  -1   7   6 4473.24 618.786   1
   1   7  -4 173.437 163.921   1
  -1   7   4 261.076 191.812   1
   1  -7  -4 239.012 136.153   2
   1   7  -2 1422.37 338.240   1
  -1   7   2 829.104 276.820   1
   1  -7  -2 1116.03 222.757   2
   1   7   0 2780.96 454.705   1
  -1   7   0 3067.13 480.807   1
  -1  -7   0 3033.99 236.434   2
   1   7   2 119.256 167.076   1
  -1   7  -2 115.886 163.275   1
  -1  -7  -2 115.826 79.7767   2
  -1   7  -4 460.097 226.297   1
   1   7   4 411.149 257.094   1
  -1  -7  -4 43.3514 95.0988   2
   1   7   6 7349.21 815.058   1
  -1   7  -6 7208.26 698.285   1
  -1  -7  -6 7756.89 674.369   2
  -1   7  -8 1750.84 347.046   1
  -1  -7  -8 2293.96 450.437   2
   1   7   8 2038.61 471.884   1
  -1  -7 -10 1745.95 470.797   2
   1   7  10 1710.85 447.272   1
   1   7  12 431.032 247.627   1
  -1  -7 -12 156.612 226.071   2
  -1  -7 -14 2710.45 737.065   3
   1   7  14 2570.93 540.726   1
  -1  -7 -16-534.847 432.079   3
  -1  -7 -18-25.6333 296.308   3
   1  -8 -17 140.340 321.846   3
   1  -8 -17 541.807 299.835   2
   1  -8 -15 386.676 296.081   2
   1  -8 -15 53.0317 281.152   3
  -1   8  13 421.864 300.859   1
   1  -8 -13 643.108 403.875   3
   1  -8 -13 628.461 365.680   2
   1  -8 -11 4914.30 742.528   2
  -1   8  11 4825.91 728.731   1
   1  -8  -9 32299.8 1736.26   2
  -1   8   9 30144.7 1829.66   1
   1   8  -9 31152.2 1479.32   1
   1  -8  -7 284.192 198.544   2
  -1   8   7 177.125 207.669   1
   1   8  -7 311.043 204.344   1
   1   8  -5 1910.13 406.420   1
   1  -8  -5 2414.71 372.241   2
  -1   8   5 1862.91 448.671   1
   1  -8  -3 10211.9 682.712   2
   1   8  -3 9581.37 873.644   1
  -1   8   3 9745.54 948.499   1
  -1   8   1 15801.4 1185.96   1
   1   8  -1 15927.3 1160.41   1
   1   8   1 34138.6 1760.54   1
  -1  -8  -1 34086.8 976.164   2
  -1   8  -1 35368.0 1773.26   1
   1   8   3 28440.1 1641.22   1
  -1  -8  -3 27003.6 1026.55   2
  -1   8  -3 29185.6 1579.70   1
  -1  -8  -5 2374.05 354.507   2
  -1   8  -5 1791.81 438.981   1
   1   8   5 2645.47 524.384   1
   1   8   7 1452.51 445.406   1
  -1  -8  -7 1625.16 368.905   2
  -1   8  -7 1779.67 419.982   1
  -1   8  -9 15779.4 1097.11   1
   1   8   9 17475.1 1372.65   1
  -1  -8  -9 18539.4 1327.67   2
  -1  -8 -11 7111.66 909.365   2
   1   8  11 6258.86 876.680   1
   1   8  13-252.942 246.375   1
  -1  -8 -15 230.230 317.820   3
  -1  -8 -17 798.980 497.464   3
   1  -9 -18 3301.87 917.175   3
   1  -9 -16 1863.90 597.446   2
   1  -9 -16 2084.37 703.067   3
   1  -9 -14 14.9954 424.615   3
  -1   9  14 445.857 323.849   1
   1  -9 -14 588.940 364.420   2
  -1   9  12 17615.7 1497.58   1
   1  -9 -12 17881.1 1506.95   2
  -1   9  10 27945.3 1860.10   1
   1  -9 -10 26867.0 1668.06   2
  -1   9   8 120.078 194.251   1
   1   9  -8 41.8601 163.989   1
   1  -9  -8 334.528 236.530   2
   1   9  -6 6093.82 725.318   1
   1  -9  -6 6141.88 646.921   2
  -1   9   6 7500.44 909.626   1
   1  -9  -4 24815.8 1172.37   2
  -1   9   4 25497.8 1643.29   1
   1   9  -4 24039.3 1475.84   1
  -1   9   2 705.955 331.812   1
   1  -9  -2 552.274 168.438   2
   1   9  -2 546.663 246.127   1
  -1   9   0 6689.02 813.153   1
  -1  -9   0 7090.54 386.587   2
   1   9   0 7335.35 842.010   1
   1   9   2 39018.3 2024.27   1
  -1  -9  -2 37055.4 1123.12   2
  -1   9  -2 41258.7 2027.28   1
  -1  -9  -4 3774.23 400.978   2
  -1   9  -4 4290.76 645.658   1
   1   9   4 5240.78 787.544   1
  -1   9  -6 26129.9 1548.52   1
  -1  -9  -6 21811.3 1186.66   2
   1   9   6 25825.4 1717.01   1
  -1  -9  -8 787.690 264.361   2
   1   9   8 809.247 371.392   1
  -1   9  -8 653.743 281.266   1
  -1  -9 -10 1985.78 489.432   2
   1   9  10 1187.93 422.820   1
   1   9  12 1418.39 423.396   1
  -1  -9 -12 2249.74 568.872   2
   1   9  14 155.702 230.653   1
  -1  -9 -14 23.1954 309.382   3
  -1  -9 -16 1525.87 678.463   3
   1 -10 -17-487.018 453.853   3
   1 -10 -15 6702.96 1180.96   3
  -1  10  13 2060.36 560.403   1
  -1  10  11 8718.94 1091.64   1
   1 -10 -11 9875.13 1070.47   2
  -1  10   9 25167.9 1835.71   1
   1 -10  -9 23513.8 1497.12   2
  -1  10   7 25938.6 1823.83   1
   1 -10  -7 24462.0 1379.12   2
   1  10  -7 26897.9 1602.69   1
  -1  10   5 107739. 3811.60   1
   1  10  -5 109042. 3543.06   1
   1 -10  -5 106975. 2917.16   2
   1 -10  -3 240914. 4718.93   2
   1  10  -3 227788. 5775.27   1
  -1  10   3 242844. 6147.53   1
  -1  10   1 47219.7 2351.10   1
   1 -10  -1 47860.2 1577.57   2
   1  10  -1 47193.5 2301.72   1
   1  10   1 15584.0 1312.43   1
  -1  10  -1 15648.4 1320.66   1
  -1  10  -3 131252. 4109.86   1
   1  10   3 130893. 4292.72   1
   1  10   5 81858.8 3336.96   1
  -1  10  -5 86818.5 3178.64   1
   1  10   7 54129.0 2659.12   1
  -1  10  -7 47503.8 2287.12   1
   1  10   9 58280.5 2874.59   1
   1  10  11 11752.0 1289.58   1
   1  10  13 4181.39 768.746   1
  -1 -10 -15 6083.14 1196.44   3
   1 -11 -16 8977.36 1464.52   3
  -1  11  14 5425.54 913.707   1
  -1  11  12 13485.6 1438.83   1
  -1  11  10 14722.4 1472.73   1
  -1  11   8 5960.96 931.427   1
   1  11  -8 6228.57 797.760   1
  -1  11   6 34082.0 2180.24   1
   1  11  -6 33667.5 1935.59   1
  -1  11   4 36409.1 2194.79   1
   1  11  -4 34730.4 2015.36   1
  -1  11   2 2414.25 543.206   1
   1  11  -2 2422.73 509.308   1
   1  11   0 4878.74 767.352   1
  -1  11   0 5376.78 830.668   1
  -1  11  -2 3539.39 674.709   1
   1  11   2 3852.86 717.875   1
   1  11   4 4325.83 774.191   1
  -1  11  -4 4091.57 719.698   1
   1  11   6 4822.15 835.123   1
  -1  11  -6 3407.94 634.482   1
   1  11   8 1786.00 585.790   1
  -1  11  -8 866.155 330.089   1
   1  11  10 9550.65 1215.23   1
   1  11  12 3850.16 801.989   1
   1  11  14-233.818 297.781   1
   1 -12 -15 2861.56 834.346   3
  -1  12  13 870.506 444.078   1
  -1  12  11 9503.14 1255.92   1
  -1  12   9 34692.1 2375.23   1
   1  12  -7 30064.7 1929.82   1
  -1  12   7 32067.7 2268.32   1
  -1  12   5 32654.5 2209.67   1
   1  12  -5 31753.0 2005.92   1
   1  12  -3 76086.3 3244.52   1
  -1  12   3 76620.7 3402.92   1
   1  12  -1 86592.8 3544.63   1
  -1  12   1 84635.0 3567.75   1
   1  12   1 80028.3 3500.94   1
  -1  12  -1 80048.8 3414.34   1
   1  12   3 74169.1 3395.60   1
  -1  12  -3 71897.8 3196.63   1
   1  12   5 32325.3 2225.54   1
  -1  12  -5 36268.4 2184.57   1
   1  12   7 27734.4 2092.43   1
  -1  12  -7 30796.9 1984.78   1
   1  12   9 36031.9 2426.41   1
   1  12  11 18701.2 1780.09   1
   1  12  13 7269.03 1119.81   1
  -1  13  14 4160.15 894.871   1
  -1  13  12 4969.40 939.919   1
  -1  13  10 6159.89 1056.12   1
  -1  13   8 8952.87 1263.16   1
   1  13  -6 2603.98 646.839   1
  -1  13   6 3791.40 827.098   1
   1  13  -4 4093.05 776.634   1
  -1  13   4 1917.73 559.548   1
   1  13  -2 7526.43 1064.36   1
  -1  13   2 9427.92 1211.27   1
   1  13   0 3944.54 796.512   1
  -1  13   0 4767.36 862.229   1
  -1  13  -2-34.6130 278.089   1
   1  13   2 136.909 297.225   1
   1  13   4 3480.19 773.481   1
  -1  13  -4 2668.98 624.772   1
  -1  13  -6 408.610 286.793   1
   1  13   6 375.607 243.384   1
   1  13   8 163.000 312.594   1
   1  13  10 659.107 406.305   1
   1  13  12 3023.53 785.033   1
  -1  14  11 3710.58 862.363   1
  -1  14   9 1224.84 503.474   1
  -1  14   7 983.374 514.380   1
   1  14  -5 2932.29 697.646   1
  -1  14   5 3438.06 853.407   1
  -1  14   3 7743.64 1182.50   1
   1  14  -3 6366.99 1030.48   1
  -1  14   1 17566.0 1709.29   1
   1  14  -1 16847.1 1678.10   1
   1  14   1 8990.73 1243.75   1
  -1  14  -1 8843.37 1225.50   1
  -1  14  -3 1162.42 443.386   1
   1  14   3 2764.71 715.613   1
  -1  14  -5 9644.75 1223.07   1
   1  14   5 9914.46 1340.23   1
   1  14   7 4183.19 919.321   1
   1  14   9 582.201 405.935   1
  -1  15   8 1223.53 565.529   1
  -1  15   6-656.564 434.750   1
   1  15  -6-102.016 234.994   1
   1  15  -4 204.945 302.247   1
  -1  15   4 498.655 354.790   1
  -1  15   2 411.116 345.249   1
   1  15  -2 216.907 295.248   1
   1  15   0 1716.46 613.121   1
  -1  15   0 2290.28 639.898   1
  -1  15  -2 423.650 373.100   1
   1  15   2-120.320 276.958   1
  -1  15  -4 7823.63 1172.41   1
   1  15   4 6007.60 1122.34   1
   1  15   6 565.083 467.367   1
   1  16  -5 1673.59 618.396   1
  -1  16   3 6649.40 1231.18   1
   1  16  -3 5431.87 1043.98   1
  -1  16   1 2284.34 757.985   1
   1  16  -1 1633.33 564.504   1
  -1  16  -1 5183.88 1052.18   1
   1  16   1 3988.07 893.311   1
  -1  16  -3 14839.7 1706.67   1
   1  16   3 13809.9 1691.85   1
  -1  16  -5 1586.72 574.127   1
   2   0 -20 281.196 360.105   3
   2   0 -18 8580.02 1240.43   3
   2   0 -16 23.8915 293.769   3
   2   0 -16 618.053 429.702   2
   2   0 -14 4473.69 780.767   3
   2   0 -14 4528.43 788.206   2
   2   0 -12 46388.5 2277.15   2
   2   0 -12 44810.8 2171.77   3
  -2   0  10 23556.1 605.601   1
   2   0 -10 26087.8 1459.73   3
   2   0 -10 26975.2 1516.41   2
   2   0  -8 70695.5 2267.04   2
   2   0  -8 71952.6 2212.40   3
  -2   0   8 64563.2 1217.39   1
   2   0  -6 172993. 3512.24   2
   2   0  -6 171138. 3423.52   3
  -2   0  -4 255032. 4761.50   3
   2   0   4 251368. 4322.85   1
   2   0   6 385383. 6338.91   1
  -2   0  -6 380835. 7126.19   3
   2   0   8 130865. 2835.06   1
  -2   0  -8 132788. 3664.29   3
   2   0  10 84800.7 2195.25   1
  -2   0 -10 89393.3 3173.38   3
   2   0  12 86634.0 2277.22   1
  -2   0 -12 94767.6 3635.02   3
  -2   0 -14 6301.82 993.522   3
  -2   0 -16 1809.96 650.028   3
  -2   0 -18 9689.80 1463.34   3
   2  -1 -21 2801.32 832.848   3
   2   1 -19 4757.53 999.888   3
   2  -1 -19 4732.25 957.187   3
   2  -1 -17 7683.69 1144.32   2
   2  -1 -17 7332.92 1120.56   3
   2   1 -17 7367.68 1118.48   3
   2   1 -15 43762.7 2501.63   2
   2  -1 -15 42232.6 2485.00   2
   2  -1 -15 39817.8 2423.50   3
   2   1 -15 38320.7 2336.19   3
   2  -1 -13 84828.1 3324.73   2
   2   1 -13 79066.7 3175.06   2
   2   1 -13 74021.7 3122.92   3
   2  -1 -13 82904.8 3198.78   3
   2   1 -11 35334.8 1864.50   2
   2  -1 -11 34242.0 1788.59   3
  -2   1  11 33235.6 999.959   1
   2  -1 -11 35171.2 1840.72   2
   2   1 -11 33805.3 1809.30   3
   2  -1  -9 130374. 3590.30   2
   2  -1  -9 132021. 3483.65   3
  -2   1   9 131266. 2517.39   1
   2   1  -9 134776. 3571.83   2
   2   1  -9 137215. 3585.26   3
   2  -1  -7 276751. 5192.57   3
   2   1  -7 260565. 5277.09   3
  -2   1   7 264419. 4384.33   1
   2  -1  -7 275793. 5306.88   2
   2   1  -7 257481. 5195.47   2
  -2   1   5 431.864 110.404   1
   2   1  -5 885.260 192.879   2
   2  -1  -5 829.445 179.996   3
   2  -1  -5 479.324 172.968   2
   2   1  -5 1192.65 236.048   3
   2   1  -3 230246. 2734.11   1
   2  -1  -3 230974. 3290.26   2
   2   1  -3 225497. 3116.36   2
   2   1   3 88391.3 1954.04   1
  -2   1  -3 87331.1 2044.35   3
   2  -1   3 86218.4 1841.33   1
   2   1   5 15750.1 745.855   1
  -2   1  -5 16002.4 904.694   3
   2  -1   5 16080.9 695.719   1
  -2  -1  -7 8750.56 794.939   3
   2   1   7 7621.75 553.309   1
   2  -1   7 8619.44 537.735   1
  -2   1  -7 8857.01 782.310   3
   2  -1   9 4530.97 411.810   1
  -2   1  -9 4795.92 676.704   3
   2   1   9 4213.97 443.180   1
  -2  -1  -9 5824.71 748.238   3
   2  -1  11 241.314 135.729   1
  -2  -1 -11 289.853 279.466   3
   2   1  11 233.556 139.977   1
  -2   1 -11 28.3734 204.881   3
  -2   1 -13 6188.97 930.421   3
  -2  -1 -13 4533.39 826.460   3
  -2   1 -15 16678.4 1657.91   3
  -2  -1 -15 15421.7 1604.07   3
  -2   1 -17 738.614 426.872   3
  -2  -1 -17 1032.70 571.101   3
  -2  -1 -19 1737.37 755.544   3
  -2   1 -19 2454.08 787.982   3
   2  -2 -20 295.348 317.783   3
   2  -2 -18-388.454 482.657   3
   2  -2 -16 364.110 406.530   3
   2  -2 -16 851.812 427.237   2
   2  -2 -14 13987.0 1343.07   3
   2  -2 -14 16033.3 1469.18   2
   2   2 -14 13557.9 1306.38   3
  -2   2  12 25441.2 1019.10   1
   2  -2 -12 25015.9 1648.11   2
   2   2 -12 24593.9 1638.22   3
   2  -2 -12 27203.6 1687.90   3
   2   2 -12 23988.7 1611.55   2
   2  -2 -10 855.972 316.902   2
  -2   2  10 1601.75 248.844   1
   2   2 -10 1224.55 362.968   3
   2   2 -10 865.298 333.395   2
   2  -2  -8 6549.06 639.733   3
   2  -2  -8 6442.47 648.948   2
  -2   2   8 6683.39 483.798   1
   2   2  -8 5378.79 597.826   2
   2  -2  -6 215034. 4163.60   3
   2  -2  -6 205129. 4235.04   2
  -2   2   6 206811. 3803.76   1
   2   2  -6 208838. 4128.84   2
  -2  -2   4 642979. 9583.50   1
   2   2  -4 636858. 9969.25   2
   2  -2  -4 659471. 10205.2   2
   2   2  -2 342148. 5216.42   1
   2   2  -2 343797. 4914.58   2
   2   2   0 74603.9 1716.30   1
  -2   2  -2 60853.7 1504.55   3
   2   2   2 60722.3 1596.49   1
  -2   2  -4 211521. 4146.65   3
   2  -2   4 204445. 3741.55   1
   2   2   4 215224. 4021.68   1
   2  -2   6 411893. 6864.26   1
  -2   2  -6 426037. 7710.34   3
  -2  -2  -8 63499.1 2423.87   3
   2   2   8 64415.2 1928.44   1
   2  -2   8 57418.5 1614.84   1
  -2   2  -8 61727.9 2338.54   3
   2  -2  10 5569.46 450.728   1
  -2   2 -10 7160.36 861.026   3
  -2  -2 -10 7449.64 913.771   3
   2   2  10 7080.69 622.132   1
   2   2  12 30260.7 1378.10   1
  -2  -2 -12 33003.5 2094.57   3
  -2   2 -12 34024.5 2084.63   3
  -2  -2 -14 10437.9 1277.66   3
  -2   2 -14 7966.24 1102.35   3
  -2   2 -16 1037.67 522.835   3
  -2  -2 -16 1138.40 528.839   3
  -2  -2 -18 1560.31 590.635   3
  -2   2 -18 2539.06 766.358   3
   2  -3 -21 577.078 462.530   3
   2  -3 -19 570.388 541.230   3
   2  -3 -17 968.911 502.698   3
   2  -3 -17 1873.05 669.219   2
   2  -3 -15 11785.5 1327.69   2
   2  -3 -15 11288.3 1272.50   3
   2  -3 -13 16401.1 1400.41   2
  -2   3  13 15625.3 889.059   1
   2  -3 -13 15153.5 1336.84   3
   2   3 -11 628.261 298.083   2
   2  -3 -11 1278.29 391.926   3
   2  -3 -11 1284.38 392.226   2
  -2   3  11 1448.94 283.723   1
   2  -3  -9-4.56853 187.099   2
   2  -3  -9 128.951 145.700   3
  -2   3   9 126.205 116.992   1
   2   3  -9 17.9474 138.251   2
  -2   3   7 7701.36 582.134   1
   2   3  -7 7395.73 341.101   1
   2  -3  -7 6850.39 642.773   2
   2  -3  -5 19463.8 954.806   2
   2   3  -5 19460.7 870.784   2
  -2   3   5 22237.5 965.766   1
   2   3  -5 21342.4 729.696   1
   2  -3  -3 44939.1 1306.94   2
   2   3  -3 44991.9 1263.57   1
   2   3  -3 43247.1 1065.38   2
  -2  -3   3 43864.8 1074.67   2
   2   3  -1 21840.0 881.353   1
   2   3   1 4450.17 421.210   1
   2   3   1 4593.86 258.634   2
  -2  -3  -3 5918.80 447.133   2
   2   3   3 5525.61 490.747   1
  -2   3  -5 2855.53 391.166   3
  -2  -3  -5 3549.43 436.194   2
   2   3   5 3545.46 421.959   1
  -2   3  -7 5735.07 639.755   3
   2   3   7 4644.64 509.783   1
  -2  -3  -7 5158.63 621.918   2
  -2   3  -9 360.898 237.372   3
   2   3   9 72.9958 131.322   1
  -2  -3  -9 0.45146 214.289   3
  -2  -3 -11 42.7388 297.044   3
  -2   3 -11 296.887 327.168   3
   2   3  11 12.5649 169.824   1
  -2   3 -13 145.096 266.127   3
  -2  -3 -13 153.288 301.312   3
   2   3  13-102.155 184.965   1
  -2  -3 -15 571.994 429.794   3
  -2   3 -15 224.385 345.715   3
  -2  -3 -17 792.128 476.423   3
  -2  -3 -19 291.638 409.178   3
   2  -4 -20 86.4327 302.304   3
   2  -4 -18 402.443 428.830   2
   2  -4 -18-183.949 332.408   3
   2  -4 -16 309.419 402.496   3
   2  -4 -16 398.019 356.523   2
   2  -4 -14 3168.88 680.778   2
   2  -4 -14 3188.44 668.234   3
  -2   4  14 3013.99 448.798   1
   2  -4 -12 8484.15 980.106   3
   2  -4 -12 9567.14 1022.81   2
  -2   4  12 8780.77 738.989   1
  -2   4  10 3350.58 453.289   1
   2  -4 -10 4126.85 639.254   3
   2  -4 -10 2518.02 503.350   2
  -2   4   8 12201.7 824.075   1
   2  -4  -8 11284.2 890.414   2
   2   4  -8 11087.7 520.683   1
   2  -4  -6 2912.78 414.050   2
   2   4  -6 2700.41 288.621   1
  -2   4   6 3223.47 430.753   1
   2  -4  -4 25058.0 1050.32   2
   2   4  -4 25170.0 981.863   1
  -2   4   4 25198.7 1148.86   1
   2   4  -2 38661.0 1317.13   1
  -2  -4   2 34787.3 745.763   2
   2   4   0 15799.8 861.820   1
  -2  -4  -2 10570.4 520.383   2
   2   4   2 10533.3 718.696   1
  -2  -4  -4 2111.62 304.167   2
   2   4   4 1178.89 280.822   1
  -2  -4  -6 32551.4 1466.83   2
   2   4   6 32939.0 1452.86   1
   2   4   8 691.685 244.977   1
  -2  -4  -8 1560.97 389.830   2
  -2  -4 -10 2694.17 573.741   3
   2   4  10 2397.04 425.410   1
  -2  -4 -12 763.262 365.733   3
   2   4  12 562.711 246.093   1
  -2  -4 -14 469.846 405.352   3
  -2  -4 -16 640.913 423.852   3
  -2  -4 -18 369.209 405.265   3
   2  -5 -19 426.692 431.429   3
   2  -5 -17 12.9834 371.148   2
   2  -5 -17 181.986 327.340   3
   2  -5 -15 24322.8 1917.18   3
   2  -5 -15 23765.4 1908.00   2
   2  -5 -13 24701.0 1729.30   2
  -2   5  13 25787.7 1409.60   1
   2  -5 -13 25534.5 1822.60   3
   2  -5 -11 394.604 308.589   3
  -2   5  11 714.302 253.758   1
   2  -5 -11 871.091 380.435   2
   2  -5  -9 11277.9 957.676   2
  -2   5   9 11363.7 910.794   1
   2   5  -9 12511.4 630.275   1
   2   5  -7 97089.5 2293.35   1
   2  -5  -7 98429.5 2794.23   2
  -2   5   7 94448.5 2762.73   1
  -2   5   5 41564.5 1683.41   1
   2  -5  -5 42104.7 1530.90   2
   2   5  -5 44299.6 1459.42   1
  -2   5   3 25787.1 1256.81   1
   2  -5  -3 27152.7 1083.68   2
  -2  -5   3 27758.1 814.436   2
   2   5  -3 26507.0 1163.69   1
   2   5  -1 697.439 214.068   1
   2   5   1 38547.7 1553.02   1
  -2  -5  -1 36791.4 881.369   2
  -2  -5  -3 28836.2 1050.76   2
   2   5   3 32028.5 1443.00   1
   2   5   5 71404.5 2346.83   1
  -2  -5  -5 68290.1 2087.98   2
  -2  -5  -7 3159.57 493.843   2
   2   5   7 4855.84 598.955   1
  -2  -5  -9 6299.73 770.238   2
   2   5   9 6139.62 691.838   1
  -2  -5 -11 610.722 383.514   3
   2   5  11 409.021 256.778   1
  -2  -5 -13 2990.91 698.381   3
   2   5  13 3035.69 530.315   1
  -2  -5 -15 1732.07 645.888   3
  -2  -5 -17-660.559 461.931   3
   2  -6 -20 344.559 387.799   3
   2  -6 -18 1045.15 543.833   3
   2  -6 -18 1824.25 649.811   2
   2  -6 -16 503.901 377.783   2
   2  -6 -16-348.627 350.001   3
  -2   6  14 2919.34 517.809   1
   2  -6 -14 3531.25 758.844   3
   2  -6 -14 3166.31 689.869   2
   2  -6 -12 17165.2 1396.99   2
  -2   6  12 16820.0 1205.36   1
   2  -6 -12 19024.7 1521.61   3
   2  -6 -10 5999.11 755.725   2
  -2   6  10 5048.84 664.727   1
   2   6 -10 4312.16 411.171   1
   2   6  -8 71167.6 1997.54   1
   2  -6  -8 65207.4 2358.23   2
  -2   6   8 69013.9 2441.60   1
   2  -6  -6 191168. 4267.10   2
   2   6  -6 199248. 4108.79   1
  -2   6   6 194844. 4600.14   1
  -2   6   4 9021.18 810.612   1
   2  -6  -4 9306.85 674.831   2
   2   6  -4 10751.1 760.609   1
   2   6  -2 121391. 3074.60   1
  -2   6   2 124905. 3272.56   1
   2   6   0 607826. 10442.9   1
   2   6   2 204488. 4610.22   1
  -2  -6  -2 193523. 3440.56   2
   2   6   4 135225. 3579.39   1
  -2  -6  -4 125325. 2902.43   2
  -2  -6  -6 174985. 4066.61   2
   2   6   6 179420. 4443.27   1
   2   6   8 42011.5 1940.46   1
  -2  -6  -8 39686.4 1874.65   2
   2   6  10 12005.1 1060.23   1
   2   6  12 36486.1 1898.43   1
  -2  -6 -12 35064.2 2353.67   3
  -2  -6 -14 12000.2 1507.48   3
  -2  -6 -16 799.209 490.231   3
  -2  -6 -18 1734.39 698.281   3
   2  -7 -19 9999.82 1454.71   2
   2  -7 -19 9835.50 1484.14   3
   2  -7 -17 5006.28 987.199   2
   2  -7 -17 5678.61 1079.85   3
   2  -7 -15 15001.1 1531.45   2
   2  -7 -15 15164.4 1594.02   3
  -2   7  13 21849.9 1485.48   1
   2  -7 -13 20702.7 1713.72   3
   2  -7 -13 21151.2 1651.61   2
   2  -7 -11 54648.6 2506.41   2
  -2   7  11 56491.3 2427.90   1
  -2   7   9 193741. 4887.82   1
   2   7  -9 195385. 4122.57   1
  -2   7   7 53438.3 2238.12   1
   2   7  -7 52793.8 1873.27   1
   2  -7  -7 52442.5 2004.67   2
  -2   7   5 1473.40 379.804   1
   2   7  -5 1305.29 299.756   1
   2  -7  -5 1760.12 327.774   2
   2   7  -3 41810.7 1747.40   1
   2  -7  -3 43662.7 1518.25   2
  -2   7   3 45817.0 1987.40   1
  -2  -7   3 41501.3 1085.53   2
   2   7  -1 235457. 5220.57   1
  -2   7   1 238168. 5372.65   1
   2   7   1 19145.3 1240.23   1
  -2  -7  -1 15393.7 506.813   2
  -2  -7  -3 607.543 155.138   2
   2   7   3 741.336 320.435   1
  -2  -7  -5 14403.1 886.078   2
   2   7   5 15791.6 1179.54   1
   2   7   7 2080.73 466.099   1
  -2  -7  -7 1623.20 368.208   2
   2   7   9 2479.14 504.152   1
  -2  -7  -9 2488.40 508.732   2
   2   7  11 6.62057 175.659   1
  -2  -7 -13 7495.94 1191.56   3
   2   7  13 7368.23 909.884   1
  -2  -7 -15 5277.05 1062.47   3
  -2  -7 -17 1059.20 584.816   3
   2  -8 -18 1638.26 641.481   3
   2  -8 -18 1516.32 654.142   2
   2  -8 -16-335.580 335.163   2
   2  -8 -16-187.377 305.604   3
   2  -8 -14 260.945 260.636   3
   2  -8 -14 811.967 397.387   2
  -2   8  14 717.926 302.909   1
  -2   8  12 26817.5 1731.33   1
   2  -8 -12 26916.4 1806.02   2
   2  -8 -10 29853.1 1758.91   2
  -2   8  10 29207.4 1822.57   1
   2  -8  -8 41311.8 1884.82   2
   2   8  -8 42014.2 1752.70   1
  -2   8   8 39010.6 2022.80   1
   2  -8  -6 96681.6 2839.34   2
  -2   8   6 99506.8 3351.95   1
   2   8  -6 103237. 3008.65   1
  -2   8   4 30804.7 1720.94   1
   2  -8  -4 28117.7 1288.12   2
   2   8  -4 29711.3 1539.19   1
  -2   8   2 142311. 4047.78   1
   2   8  -2 138619. 3821.10   1
  -2   8   0 423994. 8448.18   1
   2   8   0 428692. 8409.46   1
   2   8   2 272771. 6086.43   1
  -2   8  -2 265552. 5883.26   1
   2   8   4 177549. 4686.66   1
  -2  -8  -4 163701. 3473.64   2
   2   8   6 81591.5 3033.16   1
  -2  -8  -6 76314.4 2396.66   2
  -2  -8  -8 41791.2 1925.39   2
   2   8   8 43214.1 2202.35   1
   2   8  10 36409.3 2054.97   1
   2   8  12 23143.3 1668.63   1
   2   8  14 10765.0 1158.15   1
  -2  -8 -14 10745.4 1506.83   3
  -2  -8 -16 2881.53 885.412   3
   2  -9 -17 3320.86 852.063   3
   2  -9 -17 3977.38 939.765   2
   2  -9 -15 16026.5 1723.92   3
  -2   9  15 13885.6 1345.06   1
   2  -9 -15 17022.9 1670.32   2
   2  -9 -13 9224.36 1129.75   2
  -2   9  13 8614.01 1063.96   1
  -2   9  11 10896.0 1163.79   1
   2  -9 -11 10333.4 1091.27   2
   2   9  -9 45793.8 1965.61   1
  -2   9   9 49451.7 2442.85   1
   2  -9  -9 45174.6 2101.86   2
  -2   9   7 58173.5 2614.46   1
   2   9  -7 56231.1 2251.93   1
   2  -9  -7 56917.6 2182.87   2
  -2   9   5 55937.1 2535.61   1
   2  -9  -5 54585.8 1960.61   2
   2   9  -5 51901.5 2218.30   1
   2  -9  -3 16689.0 964.245   2
   2   9  -3 15209.7 1182.21   1
  -2   9   3 15369.9 1282.13   1
  -2   9   1 790.691 350.241   1
   2   9  -1 418.461 219.364   1
   2   9   1 442.115 290.716   1
  -2   9  -1 603.905 313.004   1
  -2   9  -3 7862.50 901.400   1
   2   9   3 9603.81 1025.69   1
  -2  -9  -3 8773.07 519.702   2
  -2   9  -5 48984.0 2216.06   1
  -2  -9  -5 42674.3 1573.35   2
   2   9   5 46050.3 2316.29   1
  -2  -9  -7 156.994 142.852   2
   2   9   7-60.2910 272.998   1
  -2   9  -7 104.514 164.215   1
   2   9   9 11178.4 1173.97   1
   2   9  11 3491.50 678.688   1
   2   9  13 3193.69 686.967   1
  -2  -9 -15 277.092 382.284   3
   2 -10 -16-181.431 380.049   3
   2 -10 -14 1444.37 545.385   3
  -2  10  14 1418.83 477.701   1
  -2  10  12 2356.21 594.413   1
   2 -10 -12 2618.14 597.185   2
  -2  10  10 2881.25 623.504   1
   2 -10 -10 3491.28 614.088   2
   2  10  -8 1197.48 357.921   1
  -2  10   8 1034.83 413.225   1
   2 -10  -8 1664.63 403.161   2
  -2  10   6 12004.7 1224.99   1
   2 -10  -6 11249.1 901.572   2
   2  10  -6 11859.0 1069.34   1
   2 -10  -4 29403.9 1384.26   2
   2  10  -4 29182.5 1736.87   1
  -2  10   4 29964.3 1899.75   1
   2 -10  -2 46270.8 1704.63   2
  -2  10   2 47827.2 2399.42   1
   2  10  -2 45853.3 2274.77   1
   2  10   0 24583.5 1676.17   1
  -2  10   0 21973.6 1595.58   1
   2  10   2 17897.7 1445.22   1
  -2  10  -2 16302.8 1348.39   1
  -2  10  -4 40854.7 2165.81   1
   2  10   4 41087.4 2271.52   1
   2  10   6 19857.8 1589.45   1
  -2  10  -6 18436.4 1408.95   1
  -2  10  -8 8860.32 960.562   1
   2  10   8 9725.52 1155.28   1
   2  10  10 5250.48 866.389   1
   2  10  12 2174.44 584.891   1
  -2 -10 -14 4521.17 1053.00   3
   2  10  14 2594.79 680.457   1
   2 -11 -17 1273.99 590.914   3
  -2  11  15-186.190 268.255   1
   2 -11 -15 1077.35 521.082   3
  -2  11  13 833.124 400.017   1
  -2  11  11 4457.10 848.028   1
  -2  11   9 980.414 404.377   1
   2  11  -7 1615.49 454.701   1
  -2  11   7 1164.98 383.332   1
  -2  11   5 74.5692 221.775   1
   2  11  -5 1263.11 417.446   1
   2  11  -3 1318.57 406.872   1
  -2  11   3 1240.72 441.372   1
  -2  11   1 1468.78 473.203   1
   2  11  -1 1183.58 434.489   1
  -2  11  -1 2394.23 568.274   1
   2  11   1 1591.02 484.432   1
  -2  11  -3 3155.36 665.510   1
   2  11   3 3217.48 665.110   1
  -2  11  -5 2704.01 607.870   1
   2  11   5 1810.11 577.167   1
   2  11   7 1165.30 479.607   1
  -2  11  -7 761.986 353.375   1
   2  11   9 62.7358 269.606   1
   2  11  11 305.468 276.264   1
   2  11  13-191.293 287.542   1
   2 -12 -16 22.9100 317.777   3
  -2  12  14 2136.14 625.143   1
  -2  12  12 6634.12 1054.20   1
  -2  12  10 323.899 349.220   1
  -2  12   8 6.55788 258.702   1
   2  12  -8 207.681 230.082   1
   2  12  -6 10813.1 1168.64   1
  -2  12   6 8669.31 1152.29   1
   2  12  -4 3845.70 727.751   1
  -2  12   4 4140.19 781.942   1
   2  12  -2 5557.12 873.884   1
  -2  12   2 7315.12 1020.93   1
   2  12   0 16787.3 1525.11   1
  -2  12   0 17272.2 1547.96   1
  -2  12  -2 2477.40 619.584   1
   2  12   2 1843.33 543.009   1
   2  12   4 4365.09 804.885   1
  -2  12  -4 5448.93 874.688   1
  -2  12  -6 21385.4 1680.46   1
   2  12   6 18895.8 1732.05   1
   2  12   8 979.426 481.512   1
   2  12  10 584.326 386.742   1
   2  12  12 3031.47 731.247   1
   2  12  14 1803.20 587.211   1
  -2  13  15 5009.18 980.846   1
   2 -13 -15 4947.71 1084.07   3
  -2  13  13 6807.66 1128.57   1
  -2  13  11 3612.13 839.364   1
  -2  13   9 14996.7 1629.09   1
  -2  13   7 14277.4 1552.58   1
   2  13  -7 12140.6 1297.47   1
  -2  13   5-36.7764 312.210   1
   2  13  -5-588.048 337.272   1
  -2  13   3 4067.68 832.667   1
   2  13  -3 6139.12 956.411   1
  -2  13   1 13851.4 1469.54   1
   2  13  -1 15399.0 1536.69   1
   2  13   1 379.225 318.881   1
  -2  13  -1 1375.91 504.148   1
   2  13   3 67.2793 269.405   1
  -2  13  -3 320.686 297.633   1
   2  13   5 2532.58 703.517   1
  -2  13  -5 3112.18 686.467   1
   2  13   7-31.4275 290.946   1
   2  13   9-424.709 339.967   1
   2  13  11 74.7195 297.420   1
  -2  14  12 1380.49 579.895   1
  -2  14  10 2205.39 692.793   1
  -2  14   8 23451.0 2121.95   1
  -2  14   6 29608.4 2343.86   1
   2  14  -6 28942.1 2099.11   1
  -2  14   4 5277.65 972.466   1
   2  14  -4 5650.50 946.977   1
  -2  14   2 27349.5 2165.45   1
   2  14  -2 23249.1 1947.79   1
  -2  14   0 89513.4 4013.51   1
   2  14   0 85717.4 3930.41   1
  -2  14  -2 41183.3 2629.18   1
   2  14   2 39392.8 2619.86   1
  -2  14  -4 12928.9 1439.58   1
   2  14   4 15509.7 1662.50   1
  -2  14  -6 28559.3 2126.52   1
   2  14   6 27449.8 2255.34   1
   2  14   8 16700.9 1799.30   1
   2  14  10 8453.45 1283.20   1
  -2  15   9 11419.0 1554.09   1
  -2  15   7 10699.5 1481.60   1
  -2  15   5 4204.96 959.902   1
   2  15  -5 4413.47 909.137   1
   2  15  -3 11299.5 1407.54   1
  -2  15   3 13095.1 1583.88   1
   2  15  -1 10569.2 1351.49   1
  -2  15   1 11367.7 1459.40   1
   2  15   1 2186.46 660.887   1
  -2  15  -1 634.004 424.458   1
  -2  15  -3 169.942 317.170   1
   2  15   3 1055.01 484.712   1
   2  15   5-239.889 333.208   1
  -2  15  -5 150.849 268.914   1
   2  15   7 132.925 302.646   1
  -2  16   4 37815.3 2895.98   1
   2  16  -4 34528.9 2541.89   1
   2  16  -2 26428.8 2252.49   1
  -2  16   2 25860.8 2330.99   1
   2  16   0 7623.35 1254.58   1
  -2  16   0 8887.18 1345.40   1
   2  16   2 10893.3 1504.30   1
  -2  16  -2 12184.7 1549.31   1
  -2  16  -4 17805.4 1867.23   1
   3   0 -21-221.642 414.951   3
   3   0 -19-250.495 423.049   3
   3   0 -17-261.280 408.613   3
   3   0 -17 49.6361 401.333   2
   3   0 -15-75.8014 279.814   2
   3   0 -15 111.163 284.820   3
   3   0 -13 192.986 286.787   2
   3   0 -13-174.946 237.790   3
   3   0 -11 193.125 237.153   2
   3   0 -11 283.740 218.960   3
   3   0  -9-107.369 170.618   3
   3   0  -9-233.525 208.103   2
  -3   0   9 221.163 48.7214   1
  -3   0   9 111.206 42.4437   1
  -3   0   7 213.339 58.3695   1
   3   0  -7 258.153 161.171   2
   3   0  -7 36.2646 123.246   3
  -3   0   7 240.965 65.9781   1
   3   0  -5 41.9840 88.4901   3
  -3   0   5 224.118 73.2552   1
   3   0  -5 252.175 132.130   2
  -3   0   3 241.728 70.7434   3
  -3   0   3 231.202 81.2097   1
   3   0  -3 297.663 86.0013   1
   3   0  -3 235.969 105.181   2
   3   0   1 661.033 150.196   1
  -3   0  -3 964.782 210.393   3
   3   0   3 502.777 147.320   1
   3   0   5 662.486 174.722   1
  -3   0  -5 844.074 241.981   3
   3   0   7 254.479 166.111   1
  -3   0  -7 295.624 234.736   3
   3   0   9 353.735 169.683   1
  -3   0  -9 338.370 238.155   3
  -3   0 -11 590.810 325.340   3
   3   0  11 359.614 176.623   1
  -3   0 -13 296.272 293.418   3
  -3   0 -15 5.55477 269.943   3
  -3   0 -17 286.635 408.381   3
   3  -1 -20 1316.61 561.487   3
   3   1 -18 5033.81 971.158   3
   3  -1 -18 4525.94 911.167   3
   3  -1 -18 4096.78 903.195   2
   3   1 -16 8024.66 1080.53   2
   3  -1 -16 7209.01 1062.40   2
   3  -1 -16 7087.25 1031.19   3
   3   1 -16 8003.46 1103.54   3
   3  -1 -14 450.197 336.492   2
   3   1 -14 482.671 327.698   3
   3  -1 -14 295.201 303.118   3
   3   1 -14 398.937 335.244   2
   3  -1 -12 6946.04 802.473   3
  -3   1  12 6550.95 383.552   1
   3  -1 -12 7005.15 850.255   2
   3   1 -12 8033.57 887.208   3
   3   1 -12 7156.68 863.957   2
   3   1 -10 59700.3 2254.77   2
   3  -1 -10 56546.4 2184.49   3
   3  -1 -10 55750.9 2275.75   2
  -3   1  10 55315.9 1361.67   1
   3   1 -10 61180.6 2271.29   3
   3   1  -8 130131. 3256.67   3
   3  -1  -8 132755. 3231.04   3
   3  -1  -8 128572. 3362.18   2
  -3   1   8 129033. 2491.04   1
   3  -1  -6 39150.7 1311.01   3
   3  -1  -6 38435.5 1439.03   2
   3   1  -4 121970. 2103.07   1
  -3  -1   4 123323. 2107.17   1
   3  -1  -4 114805. 2526.01   2
   3   1  -4 117527. 2409.32   2
   3  -1  -4 116491. 2252.94   3
   3   1  -2 11997.1 507.224   1
   3  -1  -2 9951.11 485.039   1
   3  -1   0 550081. 8256.94   1
   3   1   0 546434. 8296.63   1
   3  -1   2 186970. 3451.06   1
  -3   1  -2 186785. 3438.43   3
   3   1   2 186383. 3522.96   1
   3   1   4 26708.8 1050.83   1
   3  -1   4 26271.3 992.678   1
  -3   1  -4 26278.9 1138.71   3
   3   1   6 21738.1 1006.38   1
   3  -1   6 23027.4 981.039   1
  -3   1  -6 24476.9 1267.47   3
  -3  -1  -6 23973.8 1291.80   3
  -3  -1  -8 3967.06 621.750   3
  -3   1  -8 3967.91 583.763   3
   3   1   8 3968.12 455.048   1
   3  -1   8 4325.54 435.037   1
   3   1  10 242.351 180.295   1
  -3  -1 -10 29.2763 255.602   3
   3  -1  10 98.0222 92.2882   1
  -3   1 -10-108.855 285.113   3
  -3  -1 -12-58.0862 241.572   3
  -3   1 -12 58.1819 207.123   3
   3   1  12 120.868 137.693   1
  -3  -1 -14-26.6882 254.176   3
  -3   1 -14 412.610 374.681   3
  -3   1 -16 1225.50 615.350   3
  -3  -1 -16 934.823 521.071   3
  -3  -1 -18 455.129 443.352   3
  -3   1 -18 1184.01 613.007   3
   3  -2 -21 582.767 429.272   3
   3  -2 -19 1975.75 662.163   3
   3  -2 -19 2218.68 741.350   2
   3  -2 -17 115.416 309.527   2
   3  -2 -17 216.222 334.412   3
   3  -2 -15 5583.38 853.267   3
   3   2 -15 4267.35 791.181   2
   3  -2 -15 3855.59 766.099   2
  -3   2  13 262.628 117.244   1
   3   2 -13 109.375 236.452   2
   3  -2 -13 269.885 300.592   3
   3  -2 -11 1480.70 394.608   3
  -3   2  11 1588.89 256.581   1
   3  -2 -11 1554.89 411.909   2
   3   2 -11 1309.49 400.527   2
   3  -2  -9 33999.2 1532.53   3
   3   2  -9 32856.6 1522.33   2
   3  -2  -9 35207.3 1636.18   2
  -3   2   9 32206.1 1146.34   1
   3  -2  -7 68097.2 2002.88   3
  -3   2   7 66417.0 1735.49   1
   3   2  -7 71305.5 2084.41   2
   3  -2  -7 68311.6 2136.48   2
   3  -2  -5 303334. 5421.72   2
  -3  -2   5 299486. 4692.50   1
   3   2  -5 300633. 4655.46   1
   3   2  -5 294445. 5151.11   2
   3  -2  -5 296767. 5079.74   3
   3   2  -3 615992. 9306.97   1
   3   2  -3 622930. 9175.98   2
  -3  -2   3 611359. 9209.28   2
   3   2  -1 28365.2 968.797   1
   3   2   1 115151. 2545.42   1
   3  -2   1 119313. 2479.72   1
  -3   2  -1 118768. 2253.44   3
   3  -2   3 355588. 5900.74   1
   3   2   3 343885. 6057.28   1
  -3   2  -3 344889. 5999.63   3
   3  -2   5 58011.2 1630.96   1
  -3   2  -5 57397.5 1915.64   3
   3  -2   7 66828.3 1862.96   1
   3   2   7 62859.1 1990.50   1
  -3   2  -7 68410.9 2395.08   3
   3  -2   9 127374. 2932.31   1
   3   2   9 128825. 3216.30   1
  -3  -2  -9 134370. 4077.75   3
  -3   2  -9 133988. 3939.11   3
   3   2  11 48770.8 1850.22   1
  -3  -2 -11 50275.6 2602.97   3
   3  -2  11 47185.3 1589.40   1
  -3   2 -13 10997.9 1268.76   3
  -3  -2 -13 10587.1 1286.71   3
  -3  -2 -15 5479.87 1015.98   3
  -3   2 -15 7894.79 1189.50   3
  -3  -2 -17 1268.42 659.070   3
  -3   2 -17 1723.08 615.332   3
   3  -3 -20 2093.58 660.383   2
   3  -3 -20 1170.99 572.512   3
   3  -3 -18 16745.4 1761.96   2
   3  -3 -18 16597.4 1699.35   3
   3  -3 -16 27911.5 2090.31   2
   3  -3 -16 25981.1 1965.88   3
   3   3 -14 16443.7 1428.07   2
   3  -3 -14 16301.1 1430.77   2
   3  -3 -14 16128.4 1395.30   3
  -3   3  12 123668. 2960.72   1
   3   3 -12 118395. 3802.62   2
   3  -3 -12 128033. 3991.11   2
   3  -3 -12 125548. 3846.52   3
   3   3 -10 112169. 3306.85   2
   3  -3 -10 111032. 3353.10   2
  -3   3  10 107480. 2678.56   1
   3  -3 -10 111037. 3267.84   3
   3   3  -8 20708.4 1122.57   2
  -3   3   8 18250.5 933.609   1
   3   3  -8 18845.9 490.937   1
   3  -3  -8 19296.3 1142.08   2
   3  -3  -8 19348.7 1087.65   3
   3   3  -6 401665. 6773.55   2
   3   3  -6 408488. 6164.66   1
   3  -3  -6 399192. 7062.37   2
   3  -3  -4 823115. 12718.8   2
   3   3  -4 832356. 12247.4   2
   3   3  -4 808697. 12313.9   1
   3   3  -2 64458.4 1174.65   2
   3   3  -2 65206.0 1701.31   1
   3   3   0 5309.09 462.166   1
   3   3   2 179623. 3720.82   1
  -3   3  -4 57425.5 1822.57   3
   3   3   4 56961.3 1841.94   1
  -3   3  -6 741.795 270.441   3
   3   3   6 1311.25 299.722   1
   3   3   8 2063.70 367.874   1
  -3   3  -8 1865.50 425.111   3
   3   3  10 11620.6 892.826   1
  -3   3 -10 12203.0 1154.97   3
  -3  -3 -10 11562.8 1179.75   3
  -3   3 -12 1794.06 507.458   3
  -3  -3 -12 1552.07 520.505   3
   3   3  12 2109.57 404.200   1
  -3   3 -14 1569.28 552.106   3
  -3  -3 -14 1345.70 520.663   3
  -3  -3 -16 1347.49 581.165   3
  -3   3 -16 1364.21 535.015   3
  -3  -3 -18 1741.95 694.206   3
   3  -4 -21 24.4086 256.250   3
   3  -4 -19 2016.65 672.349   3
   3  -4 -19 2916.85 809.104   2
   3  -4 -17-77.7586 342.874   3
   3  -4 -17-59.8702 317.757   2
   3  -4 -15 1937.79 533.529   3
   3  -4 -15 2645.08 639.908   2
   3  -4 -13 753.569 359.457   2
   3  -4 -13 978.991 365.242   3
  -3   4  13 722.629 224.373   1
   3  -4 -11 35381.2 1882.84   2
   3  -4 -11 33567.4 1816.49   3
   3   4 -11 32342.7 1725.44   2
  -3   4  11 36528.9 1570.65   1
   3   4  -9 110209. 3073.36   2
   3  -4  -9 109902. 3267.59   2
   3  -4  -9 109975. 3131.58   3
  -3   4   9 108133. 2850.79   1
   3   4  -9 105264. 1956.70   1
   3   4  -7 32503.3 1008.78   1
   3  -4  -7 27740.7 1351.43   2
   3   4  -7 31861.1 1307.17   2
  -3   4   7 28003.5 1281.88   1
   3  -4  -5 155333. 3409.54   2
   3   4  -5 149432. 2995.36   2
   3   4  -5 149686. 3052.36   1
   3   4  -3 533791. 8611.41   1
  -3  -4   3 528118. 7840.58   2
   3   4  -1 257899. 4895.11   1
   3   4   1 231022. 3759.32   2
   3   4   1 236125. 4670.65   1
   3   4   3 423675. 7565.56   1
   3   4   5 143985. 3520.63   1
   3   4   7 122386. 3304.46   1
   3   4   9 145636. 3783.90   1
   3   4  11 32701.3 1640.89   1
  -3  -4 -11 35559.8 2257.77   3
   3   4  13 12609.2 1023.53   1
  -3  -4 -13 12755.4 1464.23   3
  -3  -4 -15 27049.9 2280.50   3
  -3  -4 -17 5007.59 1076.92   3
   3  -5 -20 1829.98 686.005   2
   3  -5 -20 2886.24 806.195   3
   3  -5 -18 14519.4 1660.98   2
   3  -5 -18 13053.3 1583.33   3
   3  -5 -16 10456.8 1315.31   2
   3  -5 -16 9835.46 1253.35   3
  -3   5  14 7004.75 717.205   1
   3  -5 -14 6184.25 933.047   2
   3  -5 -14 7011.26 981.925   3
   3  -5 -12 68016.0 2872.68   2
  -3   5  12 71167.1 2446.67   1
   3  -5 -12 68236.0 2834.04   3
   3  -5 -10 130502. 3789.91   2
   3  -5 -10 127913. 3711.28   3
   3   5 -10 122093. 2391.05   1
   3  -5  -8 47539.9 1954.57   2
   3   5  -8 48909.8 1433.95   1
  -3   5   8 48434.3 1880.75   1
   3   5  -6 106972. 2562.86   1
   3  -5  -6 109302. 2894.96   2
  -3   5   6 111809. 3025.34   1
   3   5  -4 308260. 5708.15   1
   3  -5  -4 313289. 5762.31   2
   3   5  -2 72180.6 2145.92   1
   3   5   0 111463. 2922.04   1
   3   5   2 91439.6 2664.44   1
   3   5   4 136.917 137.046   1
   3   5   6-35.5365 191.774   1
   3   5   8 3981.81 578.556   1
   3   5  10-67.6762 205.738   1
   3   5  12 1484.21 386.331   1
  -3  -5 -12 727.357 345.567   3
  -3  -5 -14 837.321 512.896   3
  -3  -5 -16 2225.90 774.049   3
   3  -6 -19-65.0619 296.692   3
   3  -6 -19-286.479 379.727   2
   3  -6 -17 142.024 296.035   2
   3  -6 -17-594.849 383.583   3
   3  -6 -15-14.0131 299.344   2
   3  -6 -15 193.903 312.914   3
   3  -6 -13 252.095 261.479   3
   3  -6 -13 144.818 231.420   2
   3  -6 -11 5348.67 757.328   2
  -3   6  11 6188.72 726.620   1
   3  -6 -11 5490.28 762.106   3
   3   6  -9 26182.3 1079.75   1
  -3   6   9 26280.1 1463.03   1
   3  -6  -9 24055.0 1433.62   2
  -3   6   7 41021.0 1831.07   1
   3  -6  -7 37095.2 1654.26   2
   3   6  -7 41045.3 1500.85   1
  -3   6   5 56919.5 2131.58   1
   3   6  -5 51109.4 1802.63   1
   3  -6  -5 51849.2 1834.30   2
   3   6  -3 5957.42 611.039   1
  -3  -6   3 5010.70 234.932   2
   3   6  -1 60609.2 2127.02   1
   3   6   1 179986. 4267.70   1
   3   6   3 148104. 3880.83   1
   3   6   5 46195.0 2001.54   1
   3   6   7 12473.6 1038.90   1
   3   6   9 27801.9 1612.80   1
   3   6  11 20943.9 1434.18   1
  -3  -6 -13 6387.21 1089.87   3
   3   6  13 5318.79 756.616   1
  -3  -6 -15 3704.30 919.975   3
  -3  -6 -17 1520.19 721.212   3
   3  -7 -20-148.149 260.245   3
   3  -7 -20 405.061 438.588   2
   3  -7 -18 164.393 351.322   2
   3  -7 -18 80.4331 234.282   3
   3  -7 -16 525.061 364.358   2
   3  -7 -16 679.226 402.374   3
   3  -7 -14 6651.88 1010.92   3
  -3   7  14 6790.65 848.795   1
   3  -7 -14 7005.65 1014.51   2
   3  -7 -12 1114.55 389.161   2
   3  -7 -12 1569.34 442.681   3
  -3   7  12 1366.57 425.035   1
  -3   7  10 1255.79 377.994   1
   3   7 -10 901.649 226.157   1
   3  -7 -10 500.630 270.166   2
  -3   7   8 7989.86 861.377   1
   3  -7  -8 7746.99 787.415   2
   3   7  -8 7825.34 675.825   1
   3  -7  -6 1395.10 333.020   2
  -3   7   6 1022.11 332.010   1
   3   7  -6 1219.76 301.064   1
  -3  -7   4 3716.05 275.821   2
  -3   7   4 2756.10 491.256   1
   3   7  -4 3918.36 518.219   1
   3  -7  -4 3436.78 447.081   2
   3   7  -2 13145.5 989.167   1
   3   7   0 5816.51 687.326   1
   3   7   2 540.989 277.038   1
   3   7   4 1067.40 371.360   1
   3   7   6 2405.39 509.394   1
   3   7   8 1413.22 374.959   1
   3   7  10 141.239 208.766   1
   3   7  12 199.150 222.690   1
  -3  -7 -14 114.817 291.584   3
  -3  -7 -16 68.5621 338.439   3
   3  -8 -19 205.068 338.937   3
   3  -8 -19 378.833 452.952   2
   3  -8 -17-757.519 433.668   3
   3  -8 -17-65.6074 300.115   2
   3  -8 -15 616.753 336.851   2
  -3   8  15 670.326 304.915   1
   3  -8 -15 887.957 446.960   3
  -3   8  13 945.221 379.129   1
   3  -8 -13 732.776 362.146   2
   3  -8 -13 552.910 300.961   3
   3  -8 -11 64.0709 201.148   2
  -3   8  11-33.6346 230.913   1
  -3   8   9 17824.3 1360.11   1
   3  -8  -9 17673.4 1293.87   2
   3   8  -9 18522.7 1107.14   1
  -3   8   7 11942.0 1110.27   1
   3  -8  -7 10825.6 905.248   2
   3   8  -7 10384.7 872.390   1
   3   8  -5 2516.53 440.989   1
   3  -8  -5 1899.76 366.427   2
  -3   8   5 2495.57 522.818   1
  -3   8   3-35.4796 240.114   1
   3   8  -3-23.6787 169.917   1
   3   8  -1 8794.64 882.098   1
   3   8   1 15124.1 1186.58   1
   3   8   3 83624.7 3020.64   1
   3   8   5 1071.56 398.913   1
   3   8   7 4111.73 707.984   1
   3   8   9 3318.59 640.095   1
   3   8  11 2216.64 555.686   1
  -3  -8 -13 683.270 517.016   3
   3   8  13 284.747 269.891   1
  -3  -8 -15 833.310 503.613   3
   3  -9 -18 4707.08 1036.21   3
   3  -9 -18 3569.17 908.215   2
   3  -9 -16 7263.82 1186.38   3
   3  -9 -16 7094.26 1140.73   2
   3  -9 -14 624.841 381.279   3
   3  -9 -14 1221.12 525.343   2
  -3   9  14 1268.15 432.478   1
  -3   9  12 8182.71 1035.87   1
   3  -9 -12 8052.86 1031.77   2
   3  -9 -10 19402.5 1427.08   2
  -3   9  10 20946.4 1577.93   1
   3  -9  -8 12217.8 1027.07   2
   3   9  -8 12705.1 1012.53   1
  -3   9   8 12849.2 1205.05   1
  -3   9   6 36084.0 2026.12   1
   3  -9  -6 33955.0 1622.56   2
   3   9  -6 36734.0 1819.59   1
   3  -9  -4 29893.3 1431.28   2
   3   9  -4 30950.3 1711.57   1
  -3   9   4 34208.6 1966.86   1
  -3   9   2 14552.2 1259.25   1
   3   9  -2 14496.0 1191.23   1
  -3   9   0 76351.8 2982.80   1
   3   9   0 74682.3 2895.49   1
   3   9   2 16625.8 1332.22   1
   3   9   4 18669.4 1452.13   1
   3   9   6-44.6674 211.062   1
   3   9   8 12082.0 1224.70   1
   3   9  10 40.8544 241.435   1
   3   9  12 378.992 317.555   1
  -3  -9 -14-494.535 419.468   3
   3 -10 -17-404.351 393.949   3
   3 -10 -15 1012.47 413.438   2
  -3  10  15 887.303 393.364   1
   3 -10 -15 191.007 313.893   3
   3 -10 -13-60.8582 225.638   2
  -3  10  13 28.4080 282.420   1
   3 -10 -11 8808.66 1032.74   2
  -3  10  11 9571.41 1149.18   1
   3 -10  -9 36386.3 1914.54   2
   3  10  -9 32849.3 1733.81   1
  -3  10   9 33900.4 2112.34   1
  -3  10   7 5574.00 867.164   1
   3  10  -7 5980.66 755.009   1
   3 -10  -7 6075.14 717.160   2
   3 -10  -5 43441.8 1851.75   2
   3  10  -5 44660.6 2170.09   1
  -3  10   5 46405.5 2420.33   1
   3  10  -3 140526. 4272.49   1
  -3  10   3 137802. 4455.09   1
   3 -10  -3 143381. 3593.65   2
   3  10  -1 47826.6 2368.08   1
  -3  10   1 53649.2 2574.10   1
   3  10   1 21630.3 1583.38   1
  -3  10  -1 24911.3 1707.79   1
  -3  10  -3 68795.0 2913.04   1
   3  10   3 67615.9 2955.40   1
  -3  10  -5 53271.2 2525.30   1
   3  10   5 53432.7 2655.37   1
   3  10   7 43809.4 2458.67   1
  -3  10  -7 47560.9 2353.24   1
   3  10   9 53450.9 2782.69   1
   3  10  11 8427.50 1099.08   1
   3  10  13 2114.97 600.965   1
   3 -11 -16 10507.0 1499.12   3
  -3  11  14 12520.5 1399.51   1
   3 -11 -14 12708.7 1523.26   3
  -3  11  12 35654.9 2368.73   1
  -3  11  10 21136.2 1786.50   1
  -3  11   8 3984.64 765.310   1
   3  11  -8 3717.91 649.204   1
   3  11  -6 73329.6 2975.65   1
  -3  11   6 71167.4 3246.57   1
  -3  11   4 179968. 5448.82   1
   3 -11  -4 178818. 4290.03   2
   3  11  -4 174618. 5062.78   1
  -3  11   2 36918.8 2244.67   1
   3 -11  -2 35084.0 1607.50   2
   3  11  -2 32411.6 2013.55   1
   3  11   0 7447.52 966.242   1
  -3  11   0 7011.71 959.247   1
  -3  11  -2 10744.7 1176.22   1
   3  11   2 9294.76 1104.14   1
  -3  11  -4 3232.20 658.100   1
   3  11   4 2241.92 565.620   1
  -3  11  -6 4125.80 731.614   1
   3  11   6 4744.61 851.763   1
   3  11   8 860.442 432.484   1
   3  11  10 720.504 428.666   1
   3  11  12 680.205 390.826   1
   3  11  14-509.416 338.838   1
   3 -12 -15 870.538 472.611   3
  -3  12  15 473.590 353.647   1
  -3  12  13 515.770 350.625   1
  -3  12  11 737.513 442.651   1
  -3  12   9 12187.5 1399.64   1
   3  12  -7 26549.0 1794.34   1
  -3  12   7 27571.4 2060.66   1
   3  12  -5 47965.4 2515.34   1
  -3  12   5 50074.0 2785.96   1
  -3  12   3 40260.3 2455.35   1
   3  12  -3 40452.3 2343.76   1
   3  12  -1 20812.3 1683.62   1
  -3  12   1 19148.7 1673.35   1
   3  12   1 43650.4 2514.70   1
  -3  12  -1 42804.3 2511.23   1
   3  12   3 70278.7 3316.94   1
  -3  12  -3 73283.4 3327.11   1
  -3  12  -5 37076.2 2301.39   1
   3  12   5 38475.4 2446.83   1
   3  12   7 22860.9 1924.28   1
  -3  12  -7 24240.7 1841.33   1
   3  12   9 32475.6 2330.29   1
   3  12  11 11934.7 1430.80   1
   3  12  13 3972.79 891.007   1
  -3  13  14 1286.57 536.348   1
  -3  13  12 7980.59 1206.04   1
  -3  13  10 21263.2 1980.75   1
  -3  13   8 28378.4 2216.44   1
   3  13  -6 10771.1 1208.65   1
  -3  13   6 11376.5 1396.22   1
  -3  13   4 2792.03 672.196   1
   3  13  -4 2434.04 614.624   1
  -3  13   2 9433.27 1225.15   1
   3  13  -2 8977.67 1154.05   1
  -3  13   0 20642.1 1818.91   1
   3  13   0 21397.0 1797.59   1
   3  13   2 10903.2 1334.48   1
  -3  13  -2 11124.9 1307.31   1
  -3  13  -4 274.281 256.954   1
   3  13   4 872.489 438.251   1
  -3  13  -6 595.838 338.118   1
   3  13   6 645.692 392.860   1
   3  13   8-161.942 295.225   1
   3  13  10-267.467 314.880   1
  -3  14  11 890.999 436.866   1
  -3  14   9-219.932 328.526   1
   3  14  -7 1881.53 534.027   1
  -3  14   7 2456.05 734.965   1
  -3  14   5 3340.35 796.886   1
   3  14  -5 3606.71 744.836   1
   3  14  -3 977.197 429.949   1
  -3  14   3 1118.78 449.547   1
   3  14  -1 6082.51 1000.67   1
  -3  14   1 5061.82 992.056   1
  -3  14  -1 11476.1 1407.24   1
   3  14   1 12626.9 1474.88   1
  -3  14  -3 4103.55 842.892   1
   3  14   3 5800.51 1029.42   1
  -3  14  -5 2207.28 663.580   1
   3  14   5 2798.00 755.868   1
   3  14   7 3911.25 916.861   1
   3  14   9 1108.02 522.248   1
  -3  15   8 1006.84 608.503   1
  -3  15   6 779.494 440.787   1
   3  15  -6 231.092 317.774   1
   3  15  -4 535.219 373.914   1
  -3  15   4-420.881 376.138   1
   3  15  -2 1298.81 568.690   1
  -3  15   2 1288.10 549.938   1
   3  15   0 1745.37 608.880   1
  -3  15   0 1827.01 636.541   1
  -3  15  -2 3782.68 843.754   1
   3  15   2 3313.70 808.962   1
   3  15   4 1798.41 636.169   1
  -3  15  -4 1529.02 559.508   1
   3  15   6 71.4182 277.892   1
   3  16  -5 1087.73 500.816   1
  -3  16   3 9440.71 1431.52   1
   3  16  -3 8443.68 1296.07   1
  -3  16   1 1665.99 642.314   1
   3  16  -1 1789.25 676.647   1
   3  16   1 1452.25 597.328   1
  -3  16  -1 508.877 326.068   1
  -3  16  -3 3920.58 888.713   1
   4   0 -20 1357.23 613.835   3
   4   0 -18 140.764 318.723   3
   4   0 -18 733.225 499.391   2
   4   0 -16 42.2969 269.498   2
   4   0 -16 213.923 241.640   3
   4   0 -14 1901.92 497.552   3
   4   0 -14 1440.75 466.159   2
   4   0 -12 1107.94 379.666   3
   4   0 -12 1400.08 398.094   2
  -4   0  10 4448.80 227.315   1
  -4   0  10 4204.94 217.357   1
   4   0 -10 6841.40 727.371   2
   4   0 -10 6184.89 671.059   3
  -4   0   8 384782. 5848.46   1
   4   0  -8 374114. 6942.42   3
   4   0  -8 396598. 7128.98   2
  -4   0   6 395613. 6041.86   1
   4   0  -6 387727. 6779.03   2
   4   0  -6 382772. 6528.98   3
   4   0  -4 309416. 4974.85   1
   4   0  -4 303398. 5256.71   2
   4   0  -2 128574. 2553.34   1
   4   0   2 451127. 7423.37   1
  -4   0  -4 352484. 6490.30   3
   4   0   4 359171. 6249.30   1
   4   0   6 427743. 7348.15   1
  -4   0  -6 414316. 7949.39   3
   4   0   8 89987.1 2485.94   1
  -4   0  -8 87570.3 3051.12   3
  -4   0 -10 2054.55 497.669   3
   4   0  10 1619.35 320.583   1
  -4   0 -12 44475.1 2571.76   3
  -4   0 -14 32256.8 2361.98   3
  -4   0 -16 4906.60 1035.37   3
  -4   0 -18 6484.71 1246.61   3
   4  -1 -21 7840.08 1303.90   3
   4  -1 -19 11179.3 1482.74   2
   4  -1 -19 12559.7 1544.64   3
   4   1 -17 8892.14 1212.15   2
   4  -1 -17 9318.08 1278.18   2
   4  -1 -17 9516.67 1235.56   3
   4   1 -15 39151.8 2305.00   2
   4   1 -15 36620.9 2176.91   3
   4  -1 -15 38654.4 2228.71   3
   4  -1 -15 35863.3 2218.34   2
   4   1 -13 38925.0 2060.71   2
   4  -1 -13 40113.1 2127.65   2
   4  -1 -13 39129.3 2027.71   3
   4   1 -13 39451.0 2058.07   3
  -4   1  11 83142.9 1824.57   1
   4  -1 -11 93015.8 3053.31   2
   4  -1 -11 89286.1 2863.42   3
   4   1 -11 85565.8 2916.34   2
   4   1 -11 86691.5 2906.84   3
   4  -1  -9 351940. 6799.31   2
   4   1  -9 349454. 6712.67   2
  -4   1   9 334672. 5537.96   1
   4   1  -9 346010. 6585.35   3
   4  -1  -9 332602. 6432.94   3
   4  -1  -7 513571. 8370.70   3
  -4  -1   7 507933. 7457.28   1
   4   1  -7 494753. 8527.41   2
   4  -1  -7 509300. 8708.83   2
  -4  -1   5 153727. 2707.86   1
   4   1  -5 150943. 3088.27   2
   4  -1  -5 156542. 2878.35   3
   4  -1  -5 150804. 3242.00   2
   4   1  -5 150263. 2697.64   1
   4  -1  -3 74714.6 1747.40   1
  -4   1   3 75035.4 1349.25   3
   4   1  -3 75246.6 1708.62   1
   4  -1  -1 368285. 6163.17   1
   4   1  -1 384370. 6190.03   1
  -4   1  -1 7448.65 443.008   3
   4   1   1 8746.20 563.844   1
   4  -1   1 7794.48 522.438   1
   4  -1   3 98017.9 2350.36   1
   4   1   3 97070.6 2390.10   1
  -4   1  -3 97006.5 2403.32   3
   4   1   5 168639. 3644.26   1
  -4   1  -5 168961. 3896.33   3
   4  -1   5 172487. 3599.10   1
   4  -1   7 5520.81 530.405   1
   4   1   7 6540.03 593.215   1
  -4   1  -7 7021.87 766.239   3
  -4  -1  -7 6247.51 740.059   3
  -4   1  -9 7576.11 885.758   3
  -4  -1  -9 8716.65 981.817   3
   4  -1   9 8477.52 675.865   1
   4   1   9 7393.81 675.585   1
  -4   1 -11 767.890 386.724   3
   4  -1  11 722.729 215.970   1
   4   1  11 387.016 182.520   1
  -4  -1 -13 5968.75 980.579   3
  -4   1 -13 7283.35 1060.48   3
  -4  -1 -15 237.576 412.442   3
  -4   1 -15 1232.58 570.096   3
  -4  -1 -17-38.9910 297.519   3
  -4   1 -17 54.4226 326.000   3
   4  -2 -20 519.162 447.232   2
   4  -2 -20-15.8011 300.954   3
   4  -2 -18 265.352 267.742   3
   4  -2 -18-1182.77 520.880   2
   4  -2 -16 4734.33 865.135   2
   4  -2 -16 4375.34 813.896   3
   4   2 -16 5009.77 862.054   2
   4   2 -14-7.06971 271.974   2
   4  -2 -14 295.248 225.358   3
   4  -2 -14-47.8111 268.122   2
   4  -2 -12 20361.7 1470.04   2
  -4   2  12 20819.2 898.757   1
   4   2 -12 23184.0 1488.58   2
   4  -2 -12 20430.0 1385.97   3
   4   2 -10 1690.25 416.039   2
  -4   2  10 1111.91 215.613   1
   4  -2 -10 727.841 264.461   3
   4  -2 -10 1246.63 369.719   2
   4  -2  -8 10744.8 834.867   2
   4   2  -8 10474.8 779.593   2
   4  -2  -8 10721.4 748.958   3
   4   2  -6 60301.5 1334.30   1
  -4  -2   6 58395.1 1345.91   1
   4   2  -6 64397.4 1791.58   2
   4  -2  -6 65013.4 1958.88   2
   4  -2  -6 59168.5 1618.18   3
   4   2  -4 1863.73 230.839   1
   4   2  -4 1842.44 232.890   2
   4   2  -2 132131. 2719.55   1
  -4   2   0 356016. 5462.13   3
   4   2   0 355348. 6120.20   1
   4  -2   0 356152. 5450.03   3
   4  -2   0 362988. 6088.67   1
   4   2   2 240609. 4568.70   1
  -4   2  -2 231991. 4238.92   3
   4  -2   2 238381. 4441.97   1
   4  -2   4 81135.5 2157.93   1
  -4   2  -4 82175.6 2287.23   3
   4   2   4 85441.0 2326.20   1
   4  -2   6 60682.4 1867.91   1
  -4   2  -6 58262.5 2162.95   3
  -4   2  -8 57175.2 2372.03   3
   4  -2   8 58855.9 1891.93   1
   4   2   8 63512.1 2110.88   1
  -4  -2  -8 61452.3 2589.61   3
   4  -2  10 18043.6 1012.34   1
  -4  -2 -10 22362.5 1668.99   3
  -4   2 -10 19925.9 1509.56   3
   4   2  10 22196.9 1239.91   1
  -4  -2 -12 15738.7 1536.32   3
  -4   2 -12 14925.3 1442.97   3
   4   2  12 15824.6 1091.90   1
  -4  -2 -14 4336.84 911.644   3
  -4   2 -14 6880.31 1097.20   3
  -4  -2 -16 2417.76 745.030   3
  -4   2 -16 2744.58 787.024   3
  -4   2 -18 4240.27 1008.31   3
  -4  -2 -18 3487.41 1003.88   3
   4  -3 -21-99.6558 304.002   3
   4  -3 -21 418.042 394.549   2
   4  -3 -19-25.4731 343.298   3
   4  -3 -19-66.2429 361.879   2
   4  -3 -17 831.518 417.170   2
   4  -3 -17 726.450 404.561   3
   4   3 -15 14495.4 1378.86   2
   4  -3 -15 14946.0 1377.52   3
   4  -3 -15 16662.0 1496.82   2
   4   3 -13 25414.5 1665.02   2
   4  -3 -13 24396.5 1705.52   2
   4  -3 -13 23970.9 1582.65   3
  -4   3  13 24456.5 1127.83   1
   4  -3 -11 4112.58 594.023   3
   4  -3 -11 3385.38 579.400   2
  -4   3  11 3369.54 412.600   1
   4   3 -11 2777.44 523.875   2
   4  -3  -9 895.534 266.464   3
   4   3  -9 1583.90 332.547   2
   4  -3  -9 1708.80 372.958   2
  -4   3   9 891.527 227.865   1
   4  -3  -7 7810.05 681.393   2
   4   3  -7 8212.21 642.497   2
   4   3  -7 8433.15 425.584   1
   4  -3  -7 7274.03 575.704   3
   4  -3  -5 108715. 2720.14   2
   4   3  -5 110788. 2373.55   2
   4   3  -5 113591. 2358.24   1
   4   3  -3 140853. 2496.35   2
   4   3  -3 143860. 2953.88   1
   4   3  -1 44791.9 1472.91   1
   4   3   1 5195.81 503.847   1
   4   3   3 2048.90 337.868   1
  -4   3  -3 2209.39 304.728   3
   4   3   5 13383.3 897.565   1
  -4   3  -5 12939.9 903.239   3
  -4   3  -7 5927.98 704.394   3
   4   3   7 5648.11 614.469   1
   4   3   9 339.332 166.760   1
  -4   3  -9 842.395 401.483   3
  -4  -3  -9 547.883 365.240   3
  -4   3 -11-43.4340 258.977   3
  -4  -3 -11 284.296 351.694   3
   4   3  11 153.587 205.809   1
  -4  -3 -13 245.687 284.754   3
  -4   3 -13-3.50624 280.875   3
  -4  -3 -15-286.463 352.497   3
  -4   3 -15 256.763 267.534   3
  -4  -3 -17 89.3699 325.961   3
   4  -4 -20-163.448 312.007   3
   4  -4 -20 109.693 354.263   2
   4  -4 -18-514.636 349.985   3
   4  -4 -18-672.682 447.045   2
   4  -4 -16 2078.09 581.420   3
   4  -4 -16 541.696 349.692   2
  -4   4  14 83.2875 132.174   1
   4  -4 -14-35.5135 276.480   2
   4   4 -14 163.475 205.021   2
   4  -4 -14 30.2938 200.449   3
   4   4 -12 6668.65 799.020   2
   4  -4 -12 6081.00 826.479   2
  -4   4  12 5513.56 589.168   1
   4  -4 -12 5504.33 743.564   3
  -4   4  10 113.276 150.380   1
   4  -4 -10 84.5194 202.228   2
   4   4 -10 171.794 194.284   2
   4  -4 -10 12.5470 177.199   3
   4  -4  -8 1068.86 261.767   3
   4   4  -8 743.107 146.672   1
   4   4  -8 505.324 199.427   2
   4  -4  -8 680.180 272.318   2
  -4   4   8 304.770 155.070   1
   4   4  -6 2077.92 266.451   1
   4   4  -6 2383.75 300.950   2
   4  -4  -6 1751.53 329.855   2
   4   4  -4 336.686 116.459   1
   4   4  -4 612.633 119.632   2
   4   4  -2 329.738 164.475   1
   4   4   0 4984.02 287.315   2
   4   4   0 5394.57 525.909   1
   4   4   2 3014.05 418.110   1
   4   4   4 1698.65 345.756   1
   4   4   6 4743.64 595.964   1
   4   4   8 622.998 283.193   1
  -4  -4 -10 308.365 321.930   3
   4   4  10 125.378 230.631   1
   4   4  12 727.217 295.042   1
  -4  -4 -12 1096.72 441.394   3
  -4  -4 -14 459.732 468.878   3
  -4  -4 -16 399.102 450.927   3
   4  -5 -21 149.288 379.571   3
   4  -5 -21 1985.42 716.714   2
   4  -5 -19 192.484 346.541   2
   4  -5 -19 848.761 512.569   3
   4  -5 -17-384.721 371.163   2
   4  -5 -17-103.874 384.220   3
   4  -5 -15 24971.7 1851.44   3
   4  -5 -15 27664.0 2004.84   2
   4  -5 -13 47454.4 2452.56   2
  -4   5  13 49915.9 2022.37   1
   4  -5 -13 48768.1 2414.13   3
  -4   5  11 4416.84 576.098   1
   4   5 -11 4481.10 626.577   2
   4  -5 -11 4295.37 629.171   3
   4  -5 -11 4383.90 690.347   2
  -4   5   9 16173.0 1084.14   1
   4  -5  -9 17985.7 1209.60   2
   4   5  -9 15140.5 999.895   2
   4   5  -9 15580.1 712.864   1
   4   5  -7 67206.0 1852.75   1
  -4   5   7 65841.8 2264.39   1
   4   5  -7 66052.4 1934.77   2
   4  -5  -7 64330.6 2233.49   2
   4   5  -5 36466.4 1103.66   2
   4   5  -5 36530.3 1385.29   1
   4  -5  -5 39553.8 1551.16   2
   4   5  -3 70449.1 2120.09   1
   4   5  -1 58504.5 1984.63   1
   4   5   1 673.199 251.996   1
   4   5   1 622.044 114.562   2
   4   5   3 16791.2 1089.29   1
   4   5   5 41847.7 1833.68   1
   4   5   7 2666.70 487.743   1
   4   5   9 207.287 197.338   1
   4   5  11 760.112 305.633   1
  -4  -5 -11 327.516 334.634   3
   4   5  13 1000.12 345.678   1
  -4  -5 -13 48.8541 297.584   3
  -4  -5 -15-24.5758 281.546   3
  -4  -5 -17-379.426 419.818   3
   4  -6 -20 742.780 454.642   3
   4  -6 -20-292.260 341.511   2
   4  -6 -18 1198.43 540.826   2
   4  -6 -18 215.250 306.206   3
   4  -6 -16 540.528 348.759   3
   4  -6 -16 153.206 281.156   2
  -4   6  14 2079.27 452.337   1
   4  -6 -14 2084.73 589.820   2
   4  -6 -14 2557.84 615.066   3
   4  -6 -12 8282.91 935.730   3
  -4   6  12 8381.49 842.603   1
   4  -6 -12 7241.07 902.294   2
  -4   6  10 5697.68 693.278   1
   4  -6 -10 3870.12 632.714   2
   4   6 -10 4719.26 416.271   1
   4   6  -8 536.249 174.330   1
   4  -6  -8 542.227 263.288   2
  -4   6   8 312.855 245.825   1
   4   6  -6 108787. 2848.57   1
  -4   6   6 113965. 3291.85   1
   4  -6  -6 114169. 3116.24   2
   4   6  -4 86659.5 2536.92   1
   4   6  -2 61945.9 2159.21   1
   4   6   0 230613. 5082.82   1
   4   6   2 101671. 3074.37   1
   4   6   4 61578.1 2355.13   1
   4   6   6 94444.4 3100.18   1
   4   6   8 27387.3 1631.87   1
   4   6  10 25162.3 1609.98   1
  -4  -6 -12 32666.1 2390.10   3
   4   6  12 29405.3 1789.87   1
  -4  -6 -14 3815.66 913.874   3
  -4  -6 -16 577.421 428.488   3
   4  -7 -19 6078.20 1189.07   2
   4  -7 -19 7330.59 1238.16   3
   4  -7 -17 5639.19 1018.63   2
   4  -7 -17 4569.50 881.312   3
  -4   7  15 30833.1 1780.60   1
   4  -7 -15 27853.7 2046.34   2
   4  -7 -15 30967.5 2169.86   3
  -4   7  13 60416.1 2571.71   1
   4  -7 -13 55316.8 2718.18   2
   4  -7 -13 55935.1 2706.75   3
   4  -7 -11 52642.3 2441.81   2
  -4   7  11 54188.2 2350.53   1
   4   7  -9 209102. 4412.70   1
   4  -7  -9 210561. 5159.78   2
  -4   7   9 217515. 5280.77   1
   4   7  -7 140358. 3494.95   1
  -4   7   7 148763. 4094.48   1
   4  -7  -7 140914. 3754.24   2
  -4   7   5 7978.90 840.894   1
   4   7  -5 7274.39 703.126   1
   4  -7  -5 7281.53 690.071   2
   4   7  -3 113698. 3222.38   1
   4   7  -1 231720. 5278.67   1
   4   7   1 124204. 3592.30   1
   4   7   3 61938.9 2462.61   1
   4   7   5 7946.93 867.185   1
   4   7   7 571.400 281.542   1
   4   7   9 2141.38 521.795   1
   4   7  11 14608.0 1286.12   1
  -4  -7 -13 148.941 338.018   3
   4   7  13-159.516 229.911   1
  -4  -7 -15 2189.49 744.022   3
   4  -8 -20 633.759 494.163   2
   4  -8 -20 1441.14 619.029   3
   4  -8 -18 227.426 323.692   3
   4  -8 -18-76.8019 281.893   2
   4  -8 -16-37.1891 283.175   3
   4  -8 -16 157.386 271.884   2
   4  -8 -14 3275.18 731.558   3
   4  -8 -14 3057.52 719.625   2
  -4   8  14 3911.62 691.014   1
  -4   8  12 983.401 367.681   1
   4  -8 -12 1760.01 464.905   2
   4  -8 -10 536.786 251.609   2
  -4   8  10 543.541 262.528   1
  -4   8   8 10422.5 1061.29   1
   4  -8  -8 9838.38 920.867   2
   4   8  -8 9828.63 822.500   1
   4  -8  -6 30655.4 1547.08   2
  -4   8   6 31471.7 1819.71   1
   4   8  -6 29073.1 1508.62   1
   4   8  -4 29511.9 1572.87   1
  -4   8   4 33101.2 1849.60   1
   4  -8  -4 33462.4 1544.74   2
   4   8  -2 136234. 3843.87   1
   4   8   0 284592. 6403.73   1
   4   8   2 41920.9 2065.84   1
   4   8   4 41262.4 2102.89   1
   4   8   6 157384. 4595.60   1
   4   8   8 40023.6 2181.57   1
   4   8  10 16615.2 1426.29   1
   4   8  12 23282.7 1738.28   1
  -4  -8 -14 11981.8 1649.33   3
   4  -9 -19 1694.25 640.531   3
   4  -9 -19 222.390 366.459   2
   4  -9 -17 1335.03 547.621   2
   4  -9 -17 1077.20 490.391   3
  -4   9  15 19092.7 1587.00   1
   4  -9 -15 21262.6 1833.62   2
   4  -9 -15 21067.6 1867.96   3
   4  -9 -13 56012.0 2821.43   2
  -4   9  13 53774.6 2698.66   1
   4  -9 -13 55716.7 2866.58   3
   4  -9 -11 16449.5 1383.44   2
  -4   9  11 19690.7 1547.12   1
   4   9  -9 23229.8 1356.50   1
   4  -9  -9 23693.1 1531.68   2
  -4   9   9 24351.1 1708.26   1
  -4   9   7 60056.2 2723.64   1
   4  -9  -7 61972.3 2390.32   2
   4   9  -7 60393.7 2351.54   1
   4   9  -5 99493.4 3245.29   1
   4  -9  -5 103216. 3074.54   2
  -4   9   5 107151. 3694.90   1
   4   9  -3 95311.7 3238.11   1
  -4   9   3 105130. 3653.38   1
   4   9  -1 13486.1 1163.64   1
   4   9   1 13134.8 1197.93   1
   4   9   3 28629.8 1810.25   1
   4   9   5 15399.9 1355.98   1
   4   9   7 4239.33 735.396   1
   4   9   9-187.352 219.987   1
   4   9  11 75.5050 280.358   1
   4   9  13 97.3101 275.552   1
   4 -10 -18-1048.53 527.691   3
   4 -10 -16-64.0972 327.389   3
   4 -10 -16 794.672 492.434   2
   4 -10 -14 89.2890 280.700   3
   4 -10 -14-509.983 339.030   2
  -4  10  14 118.571 224.844   1
  -4  10  12 863.964 422.776   1
   4 -10 -12 735.167 396.899   2
  -4  10  10 2171.13 592.648   1
   4 -10 -10 1484.61 444.367   2
   4  10  -8-24.5496 220.370   1
   4 -10  -8-206.784 309.812   2
  -4  10   8 435.921 295.474   1
   4  10  -6 2631.82 525.463   1
  -4  10   6 2676.25 618.243   1
   4 -10  -6 3617.41 549.300   2
   4  10  -4 24639.8 1607.43   1
  -4  10   4 25175.0 1800.92   1
   4 -10  -4 26083.3 1426.54   2
   4  10  -2 10589.3 1089.69   1
  -4  10   2 10605.8 1159.33   1
  -4  10   0 10470.5 1127.43   1
   4  10   0 9098.00 1024.54   1
   4  10   2 20967.6 1595.17   1
   4  10   4 22453.6 1689.24   1
   4  10   6 13067.7 1338.80   1
   4  10   8 6270.12 945.521   1
   4  10  10 5872.51 948.265   1
   4  10  12 1660.36 551.554   1
  -4 -10 -14 1479.56 661.682   3
   4 -11 -17 852.717 495.812   3
  -4  11  15 163.530 373.116   1
   4 -11 -15 368.621 351.295   3
  -4  11  13 635.426 345.554   1
  -4  11  11 2515.28 672.271   1
  -4  11   9 2299.85 601.149   1
   4 -11  -9 1944.36 455.890   2
  -4  11   7 1039.86 422.229   1
   4  11  -7 1413.91 447.246   1
   4 -11  -7 1251.03 376.661   2
   4 -11  -5 825.806 274.320   2
  -4  11   5 1014.32 476.109   1
   4  11  -5 582.405 349.989   1
   4  11  -3 3155.79 646.704   1
  -4  11   3 4002.89 741.890   1
   4 -11  -3 3925.62 559.212   2
   4  11  -1 282.167 240.854   1
  -4  11   1 530.586 274.445   1
   4  11   1 19053.2 1599.13   1
  -4  11  -1 20417.2 1664.58   1
   4  11   3 1942.71 529.754   1
  -4  11  -3 1443.78 464.127   1
  -4  11  -5 5958.25 887.003   1
   4  11   5 5548.38 926.625   1
  -4  11  -7-475.223 308.157   1
   4  11   7-132.260 263.729   1
   4  11   9 127.563 263.029   1
   4  11  11-52.7585 333.324   1
   4  11  13-48.4162 233.344   1
   4 -12 -16 210.788 349.363   3
   4 -12 -14-835.586 450.528   3
  -4  12  14-43.7074 305.465   1
  -4  12  12 7274.29 1133.87   1
  -4  12  10-400.211 354.215   1
   4  12  -8 24.3319 175.481   1
  -4  12   8 396.783 357.932   1
   4  12  -6 1245.24 423.767   1
  -4  12   6 1462.12 542.097   1
  -4  12   4-748.567 387.917   1
   4  12  -4 124.991 237.401   1
   4  12  -2 4731.66 801.721   1
  -4  12   2 3687.83 772.424   1
  -4  12   0 18255.9 1647.86   1
   4  12   0 18338.3 1618.80   1
  -4  12  -2 1357.24 513.743   1
   4  12   2 1590.91 536.523   1
  -4  12  -4 1723.93 554.575   1
   4  12   4 1094.78 466.872   1
  -4  12  -6 6476.03 959.535   1
   4  12   6 6070.14 999.298   1
   4  12   8 1048.80 482.067   1
   4  12  10-228.017 356.054   1
   4  12  12 2793.93 725.549   1
  -4  13  15 6012.79 1084.19   1
  -4  13  13 6552.39 1125.53   1
  -4  13  11 2011.88 652.510   1
  -4  13   9 26745.8 2186.84   1
  -4  13   7 36688.1 2520.21   1
   4  13  -7 33635.7 2160.66   1
   4  13  -5 3098.42 683.518   1
  -4  13   5 3629.26 842.406   1
   4  13  -3 7449.44 1049.35   1
  -4  13   3 7389.39 1123.12   1
  -4  13   1 16324.1 1620.27   1
   4  13  -1 13128.8 1413.87   1
   4  13   1 2986.40 717.219   1
  -4  13  -1 1892.02 577.206   1
  -4  13  -3 9782.02 1271.11   1
   4  13   3 7692.27 1132.20   1
   4  13   5 13497.8 1519.46   1
  -4  13  -5 12181.6 1408.99   1
   4  13   7-88.3832 293.248   1
   4  13   9-85.1016 370.869   1
   4  13  11 1170.06 533.324   1
  -4  14  12 327.733 346.607   1
  -4  14  10 11.1545 378.783   1
  -4  14   8 4010.78 875.907   1
  -4  14   6 26012.9 2184.08   1
   4  14  -6 20545.9 1772.73   1
  -4  14   4 7825.36 1200.51   1
   4  14  -4 5377.30 918.247   1
  -4  14   2 5667.43 1016.02   1
   4  14  -2 5737.37 987.587   1
  -4  14   0 22672.1 2005.63   1
   4  14   0 22017.3 1928.82   1
  -4  14  -2 26018.1 2144.31   1
   4  14   2 23489.0 2049.00   1
  -4  14  -4 24969.1 2084.03   1
   4  14   4 26237.3 2207.54   1
   4  14   6 23717.2 2132.05   1
   4  14   8 6729.77 1118.26   1
  -4  15   9 25796.8 2372.21   1
  -4  15   7 21805.3 2121.47   1
   4  15  -5 10768.5 1349.04   1
  -4  15   5 14954.2 1712.96   1
  -4  15   3 22101.9 2080.42   1
   4  15  -3 18049.9 1786.42   1
   4  15  -1 17262.7 1771.35   1
  -4  15   1 21272.0 2045.00   1
   4  15   1 3729.26 838.052   1
  -4  15  -1 3904.11 880.821   1
   4  15   3 8143.34 1270.54   1
  -4  15  -3 9147.94 1330.35   1
  -4  15  -5 7794.48 1221.76   1
   4  15   5 7055.24 1192.66   1
   4  16  -4 1548.16 591.740   1
  -4  16   4 2780.72 820.071   1
  -4  16   2 22133.0 2170.03   1
   4  16  -2 20043.7 1987.05   1
  -4  16   0 20513.7 2067.54   1
   4  16   0 17150.1 1869.80   1
  -4  16  -2 9310.72 1392.26   1
  -4  16  -4 5952.32 1114.10   1
   5   0 -21 700.416 491.281   2
   5   0 -19-827.632 453.379   3
   5   0 -19 521.847 422.223   2
   5   0 -17-130.993 342.070   3
   5   0 -17 230.901 327.880   2
   5   0 -15-277.627 218.344   2
   5   0 -15 183.014 244.600   3
   5   0 -13-132.262 235.882   3
   5   0 -13-83.8228 347.581   2
  -5   0  11 47.2134 44.8525   1
   5   0 -11 195.122 165.153   2
  -5   0  11-36.2963 33.9919   1
   5   0 -11 41.4652 167.535   3
   5   0  -9 88.0359 182.731   2
   5   0  -9 11.7311 137.863   3
   5   0  -7 282.884 207.542   2
   5   0  -5 127.225 83.6895   1
   5   0  -5 195.016 126.210   2
   5   0  -3 138.488 130.312   1
   5   0  -1 369.725 138.964   1
   5   0   1 901.053 226.419   1
   5   0   3 424.883 162.151   1
  -5   0  -5 453.031 207.350   3
   5   0   5 365.284 181.608   1
  -5   0  -7 681.243 341.627   3
   5   0   7 465.685 231.104   1
  -5   0  -9-79.4434 268.836   3
   5   0   9-363.542 188.646   1
  -5   0 -11 52.3321 312.642   3
   5   0  11 52.0616 158.233   1
  -5   0 -13 45.0489 301.326   3
  -5   0 -15-163.451 350.702   3
  -5   0 -17 232.875 406.274   3
   5  -1 -20 724.587 444.126   3
   5   1 -20-14.0882 396.358   2
   5  -1 -20-24.4098 326.670   2
   5   1 -18 8764.97 1249.99   2
   5  -1 -18 7504.71 1119.70   3
   5  -1 -18 6002.20 1059.15   2
   5  -1 -16 9234.22 1118.07   3
   5  -1 -16 7485.22 1046.61   2
   5   1 -16 8031.61 1064.98   2
   5  -1 -14 353.087 242.449   3
   5   1 -14 307.980 258.635   2
   5  -1 -14 930.414 386.997   2
   5  -1 -12 13926.6 1094.02   3
   5   1 -12 15757.3 1224.53   2
   5  -1 -12 15676.7 1240.69   2
  -5   1  12 14030.8 622.350   1
   5   1 -10 66893.5 2343.63   2
   5  -1 -10 62893.4 2342.57   2
   5  -1 -10 65007.8 2225.76   3
  -5   1  10 63027.4 1602.75   1
   5  -1  -8 29400.0 1227.69   3
  -5  -1   8 28167.2 800.204   1
   5  -1  -8 27629.3 1340.81   2
   5   1  -8 29213.0 1329.56   2
   5  -1  -6 73020.2 1775.54   3
   5   1  -6 74111.5 2020.35   2
   5  -1  -6 73124.7 2111.88   2
   5   1  -6 70630.9 1645.47   1
   5  -1  -4 10100.7 590.308   1
   5   1  -4 10208.4 569.369   1
  -5   1   4 9783.63 413.167   3
   5  -1  -2 925.711 210.369   1
   5   1  -2 863.574 200.315   1
   5   1   0 389964. 6691.64   1
   5  -1   0 389710. 6662.08   1
  -5   1  -2 318472. 5599.30   3
   5   1   2 319356. 5840.22   1
   5  -1   2 323657. 5817.38   1
  -5   1  -4 885.326 269.672   3
   5  -1   4 1413.63 296.711   1
   5   1   4 1855.02 332.751   1
   5  -1   6 16854.3 985.577   1
   5   1   6 19930.4 1093.71   1
  -5  -1  -6 19621.0 1286.92   3
  -5   1  -6 17070.5 1146.42   3
   5   1   8 3893.51 523.537   1
  -5  -1  -8 4562.15 705.314   3
  -5   1  -8 4628.62 685.042   3
   5  -1   8 3229.74 444.448   1
   5  -1  10 7069.97 677.924   1
  -5   1 -10 8349.05 1002.93   3
   5   1  10 7415.75 727.036   1
  -5  -1 -10 8742.88 1064.42   3
  -5  -1 -12 183.791 341.835   3
   5   1  12-42.2191 151.672   1
  -5   1 -12 157.115 294.377   3
  -5  -1 -14-185.209 294.958   3
  -5   1 -14 135.511 295.315   3
  -5  -1 -16-531.285 444.085   3
  -5   1 -16-1018.21 529.489   3
   5  -2 -21 500.005 405.940   3
   5  -2 -21-447.290 439.598   2
   5  -2 -19 4450.36 984.298   2
   5  -2 -19 5247.99 975.989   3
   5   2 -19 4020.06 921.619   2
   5  -2 -17-49.7802 256.983   3
   5   2 -17-0.68788 319.512   2
   5  -2 -17 684.069 441.678   2
   5  -2 -15 368.095 274.589   3
   5   2 -15 302.497 296.617   2
   5  -2 -15 75.9814 294.755   2
  -5   2  13 16273.1 796.242   1
   5  -2 -13 16244.0 1263.03   3
   5   2 -13 15961.5 1283.61   2
   5  -2 -13 18608.0 1432.44   2
   5   2 -11 824.830 316.327   2
  -5   2  11 1021.54 207.811   1
   5  -2 -11 970.281 297.654   3
   5  -2 -11 1240.20 375.129   2
   5  -2  -9 12785.8 852.564   3
   5  -2  -9 12623.9 963.986   2
   5   2  -9 13587.9 932.763   2
  -5  -2   9 11035.8 400.886   1
   5  -2  -7 26948.5 1292.40   2
   5   2  -7 28898.8 1213.13   2
   5  -2  -7 26384.4 1049.81   3
   5   2  -7 26936.8 852.612   1
   5  -2  -5 144625. 2626.72   3
   5   2  -5 148038. 2882.68   1
   5   2  -5 143138. 2970.66   2
   5   2  -3 252751. 4578.95   1
   5  -2  -1 6745.61 539.024   1
   5   2  -1 7583.13 578.679   1
  -5   2  -1 1254.59 192.667   3
   5   2   1 928.377 242.745   1
   5  -2   1 1041.36 237.503   1
   5   2   3 185923. 4065.91   1
   5  -2   3 191878. 3978.67   1
  -5   2  -3 188074. 3884.48   3
   5  -2   5 76737.4 2245.17   1
   5   2   5 73741.4 2314.51   1
  -5   2  -5 75800.8 2416.98   3
   5  -2   7 40604.2 1597.62   1
   5   2   7 37521.9 1635.46   1
  -5   2  -7 39645.4 1881.90   3
   5  -2   9 73451.6 2319.99   1
  -5  -2  -9 78648.7 3178.03   3
   5   2   9 72464.1 2476.54   1
  -5   2  -9 78013.7 3035.93   3
   5   2  11 11776.8 976.770   1
  -5  -2 -11 13220.8 1393.30   3
  -5   2 -11 14110.5 1364.14   3
   5  -2  11 12677.0 907.453   1
  -5  -2 -13 2835.18 707.125   3
  -5   2 -13 5597.96 978.492   3
  -5  -2 -15 7121.33 1210.05   3
  -5   2 -15 6407.62 1118.40   3
  -5  -2 -17 2561.85 880.636   3
  -5   2 -17 2343.31 760.261   3
   5  -3 -22 1833.18 699.381   3
   5  -3 -20 2705.24 837.070   2
   5  -3 -20 2462.39 741.306   3
   5   3 -18 13836.1 1523.52   2
   5  -3 -18 13376.1 1550.28   2
   5  -3 -18 14535.6 1530.48   3
   5  -3 -16 22565.7 1761.72   3
   5  -3 -16 25464.5 1921.42   2
   5   3 -16 24185.3 1823.18   2
  -5   3  14 36812.6 1417.44   1
   5   3 -14 38442.0 2155.90   2
   5  -3 -14 40956.6 2276.84   2
   5  -3 -14 37407.5 2065.64   3
  -5   3  12 161541. 3602.96   1
   5  -3 -12 168053. 4641.83   2
   5   3 -12 166618. 4422.07   2
   5  -3 -12 165949. 4354.11   3
   5  -3 -10 138121. 3524.76   3
   5   3 -10 134529. 3594.25   2
   5  -3 -10 133324. 3802.51   2
  -5   3  10 136525. 3193.79   1
   5   3  -8 16950.6 650.233   1
   5  -3  -8 15816.4 887.418   3
   5   3  -8 15174.3 935.098   2
   5  -3  -8 16471.2 1088.66   2
   5   3  -6 270991. 4961.97   2
   5  -3  -6 280922. 4813.91   3
   5   3  -6 275956. 4821.35   1
   5  -3  -6 283261. 5497.86   2
   5   3  -4 747505. 11223.4   1
   5   3  -4 714054. 10786.3   2
   5   3  -2 444783. 7555.87   1
   5   3   0 363784. 6574.99   1
  -5   3  -2 64789.8 1786.67   3
   5   3   2 66486.2 2108.86   1
   5   3   4 12510.1 899.569   1
  -5   3  -4 14233.6 902.374   3
   5  -3   4 13876.8 884.868   1
  -5   3  -6 72435.3 2521.82   3
   5   3   6 73480.5 2430.57   1
   5  -3   6 74845.7 2273.60   1
  -5   3  -8 30487.0 1759.39   3
   5   3   8 31400.0 1567.33   1
   5  -3   8 30765.1 1405.59   1
  -5  -3 -10 586.960 346.628   3
  -5   3 -10 806.662 364.829   3
   5   3  10 520.571 242.585   1
  -5   3 -12-145.764 333.757   3
   5   3  12-170.424 190.045   1
  -5  -3 -12 328.308 294.605   3
  -5  -3 -14 5285.16 1023.69   3
  -5   3 -14 5175.68 972.616   3
  -5   3 -16 107.898 336.758   3
  -5  -3 -16-36.8474 337.727   3
   5  -4 -21 535.128 440.030   3
   5  -4 -21 1224.79 558.936   2
   5  -4 -19 4182.87 891.888   3
   5  -4 -19 5165.54 1044.69   2
   5  -4 -17 258.617 285.822   3
   5  -4 -17-723.511 426.443   2
   5  -4 -15 2710.34 604.972   3
   5  -4 -15 2340.57 609.088   2
   5   4 -15 1951.14 511.959   2
   5  -4 -13 28442.1 1700.37   3
   5   4 -13 29222.6 1755.41   2
   5  -4 -13 27405.7 1808.27   2
  -5   4  13 27895.2 1355.32   1
  -5   4  11 7976.42 724.846   1
   5  -4 -11 8980.73 853.458   3
   5   4 -11 9145.19 869.333   2
   5  -4 -11 8860.61 940.325   2
   5  -4  -9 110334. 2962.11   3
   5   4  -9 108773. 2221.53   1
  -5   4   9 115722. 3027.91   1
   5  -4  -9 109993. 3260.63   2
   5   4  -9 110350. 2966.07   2
   5   4  -7 1495.60 234.563   1
   5  -4  -7 1654.93 270.627   3
   5   4  -7 2035.82 306.893   2
   5  -4  -7 1229.75 308.841   2
   5   4  -5 3103.43 300.185   2
   5   4  -5 3418.07 382.969   1
   5   4  -3 188812. 3166.62   2
   5   4  -3 194441. 3997.93   1
   5   4  -1 168867. 3831.79   1
   5  -4  -1 175961. 3007.70   3
   5   4   1 104454. 2861.02   1
   5   4   3 151788. 3772.03   1
   5   4   5 63814.2 2295.61   1
   5   4   7 67382.0 2463.16   1
  -5   4  -7 67900.1 2577.01   3
   5   4   9 91877.1 3038.41   1
  -5   4  -9 94744.6 3421.26   3
  -5  -4 -11 27503.2 2066.17   3
   5   4  11 22449.3 1447.35   1
  -5   4 -11 24016.0 1797.06   3
  -5  -4 -13 10915.4 1425.19   3
  -5  -4 -15 13503.1 1716.85   3
  -5  -4 -17 4141.52 1034.19   3
   5  -5 -20 2065.92 706.375   3
   5  -5 -20 819.458 503.361   2
   5  -5 -18 17840.7 1729.16   3
   5  -5 -18 15011.0 1648.45   2
   5  -5 -16 23096.3 1884.07   2
   5  -5 -16 23950.3 1843.60   3
   5  -5 -14 12939.0 1230.47   3
   5   5 -14 12608.7 1189.08   2
   5  -5 -14 13223.2 1314.97   2
  -5   5  14 13686.3 1059.30   1
  -5   5  12 32589.2 1607.29   1
   5   5 -12 33911.5 1781.41   2
   5  -5 -12 33720.6 1942.44   2
   5  -5 -12 36101.6 1892.04   3
   5   5 -10 78833.6 2572.78   2
  -5   5  10 88779.1 2735.26   1
   5  -5 -10 81128.6 2900.72   2
   5   5 -10 79079.7 1844.02   1
   5  -5 -10 81941.2 2660.40   3
   5   5  -8 201402. 4227.52   2
   5   5  -8 194499. 3896.76   1
   5   5  -6 293390. 5127.26   2
   5  -5  -6 308214. 6015.52   2
   5   5  -6 293035. 5494.50   1
   5   5  -4 187262. 3121.50   2
   5   5  -4 180350. 3983.05   1
   5   5  -2 100671. 2780.98   1
   5   5   0 162901. 2820.61   2
   5   5   0 172005. 3988.75   1
   5   5   2 128847. 3483.61   1
   5   5   4 13826.2 1040.50   1
   5   5   6 19849.2 1300.56   1
   5   5   8 25222.0 1533.37   1
   5   5  10 240.991 198.270   1
   5   5  12 246.059 218.695   1
  -5  -5 -12-9.70510 286.463   3
  -5  -5 -14 1940.99 729.668   3
  -5  -5 -16 257.114 341.803   3
   5  -6 -21 216.246 356.367   3
   5  -6 -19 2234.29 680.399   3
   5  -6 -19 4224.24 936.283   2
   5  -6 -17 1187.54 446.648   3
   5  -6 -17 2035.80 623.664   2
   5  -6 -15 793.143 350.883   3
   5  -6 -15 362.361 284.364   2
   5  -6 -13 484.490 284.507   3
  -5   6  13 643.466 265.203   1
   5  -6 -13 753.489 370.352   2
  -5   6  11 1412.83 380.100   1
   5  -6 -11 1409.83 410.113   2
   5  -6 -11 1359.16 364.038   3
   5   6  -9 1403.42 301.563   2
   5   6  -9 1318.97 264.327   1
  -5   6   9 910.706 300.407   1
   5  -6  -9 1413.92 392.513   2
   5   6  -7 354.425 145.926   2
   5   6  -7 265.854 136.509   1
   5  -6  -7 239.984 181.302   2
   5   6  -5 81500.4 2446.42   1
   5   6  -3 88447.2 2667.36   1
   5   6  -1 486.646 229.858   1
   5   6   1 15796.9 1111.84   1
   5   6   3 74994.4 2660.58   1
   5   6   5 44358.6 2055.46   1
   5   6   7 10126.8 1001.85   1
   5   6   9 9927.55 1017.79   1
   5   6  11 16701.2 1354.82   1
   5   6  13 5558.61 812.590   1
  -5  -6 -13 7479.96 1224.41   3
  -5  -6 -15 591.159 494.483   3
   5  -7 -20 727.186 447.313   3
   5  -7 -20-146.118 417.301   2
   5  -7 -18 364.275 351.346   3
   5  -7 -18 365.354 389.866   2
   5  -7 -16 635.740 310.129   3
   5  -7 -16 578.327 425.828   2
  -5   7  14 4701.69 718.234   1
   5  -7 -14 4336.66 790.859   2
   5  -7 -14 5383.37 844.357   3
   5  -7 -12 3168.41 588.071   3
  -5   7  12 3181.05 571.861   1
   5  -7 -12 3860.25 690.818   2
  -5   7  10 877.010 384.998   1
   5   7 -10 466.047 191.041   1
   5  -7 -10 78.4283 246.647   2
   5   7  -8 10644.1 800.311   1
   5  -7  -8 11009.7 969.893   2
  -5   7   8 10218.8 997.800   1
   5   7  -6 5828.06 628.019   1
   5  -7  -6 6805.43 717.384   2
   5   7  -4 858.554 282.933   1
   5   7  -2 7666.78 782.440   1
   5   7   0 13285.8 1071.89   1
   5   7   2 17850.5 1283.18   1
   5   7   4 702.586 332.077   1
   5   7   6 1576.74 447.464   1
   5   7   8-204.365 222.864   1
   5   7  10 1234.33 432.570   1
   5   7  12 149.905 226.943   1
  -5  -7 -14 594.695 511.866   3
   5  -8 -19 2102.40 735.362   2
   5  -8 -19 2665.15 780.001   3
   5  -8 -17 192.950 284.864   3
   5  -8 -17-35.3597 284.125   2
   5  -8 -15 1428.25 469.661   3
   5  -8 -15 1926.46 577.014   2
  -5   8  15 1350.08 451.330   1
  -5   8  13-165.243 239.928   1
   5  -8 -13 74.2064 232.692   3
   5  -8 -13 371.356 265.330   2
   5  -8 -11 326.713 241.966   2
  -5   8  11 392.072 277.577   1
  -5   8   9 271.104 287.612   1
   5  -8  -9 255.214 235.705   2
   5   8  -9 213.944 200.521   1
   5   8  -7 277.944 194.033   1
   5  -8  -7 61.5280 159.972   2
  -5   8   7 224.952 304.006   1
   5   8  -5 7195.47 768.093   1
   5  -8  -5 8388.68 804.558   2
   5   8  -3 12704.8 1056.30   1
   5   8  -1 4798.82 688.687   1
   5   8   1 626.310 292.651   1
   5   8   3 23591.1 1581.86   1
   5   8   5 2745.01 588.599   1
   5   8   7 386.162 307.700   1
   5   8   9 2270.47 554.638   1
   5   8  11 214.656 240.391   1
  -5  -8 -13 731.402 618.879   3
   5   8  13-486.081 329.993   1
   5  -9 -20 1216.34 547.428   3
   5  -9 -18 6463.47 1147.92   3
   5  -9 -18 8349.12 1265.13   2
   5  -9 -16 4696.90 892.012   3
   5  -9 -16 3740.29 820.758   2
   5  -9 -14 592.592 313.109   2
   5  -9 -14 173.985 245.200   3
  -5   9  14 248.119 221.266   1
   5  -9 -12 19037.7 1558.70   2
  -5   9  12 19018.4 1540.46   1
  -5   9  10 33210.0 2030.29   1
   5  -9 -10 29231.1 1806.68   2
   5  -9  -8 16625.2 1253.18   2
  -5   9   8 15776.8 1374.95   1
   5   9  -8 13485.5 1059.56   1
   5   9  -6 78808.4 2842.60   1
   5  -9  -6 83093.4 2854.51   2
  -5   9   6 88849.8 3373.67   1
   5   9  -4 64334.5 2573.47   1
   5   9  -2 423.968 292.376   1
   5   9   0 22680.5 1568.44   1
   5   9   2 73125.7 2988.59   1
   5   9   4 1915.09 485.155   1
   5   9   6 695.185 301.858   1
   5   9   8 9151.39 1113.63   1
   5   9  10-433.271 312.141   1
   5   9  12-367.474 307.317   1
  -5  -9 -14 724.455 523.794   3
   5 -10 -19 1713.24 643.706   3
   5 -10 -17 249.702 329.820   3
   5 -10 -17-547.857 403.528   2
   5 -10 -15 531.265 377.360   2
   5 -10 -15 78.1601 245.127   3
  -5  10  15 823.080 362.020   1
   5 -10 -13 2908.72 647.259   3
  -5  10  13 3113.12 689.935   1
   5 -10 -13 2938.17 637.617   2
  -5  10  11 5196.83 860.692   1
   5 -10 -11 3218.71 650.007   2
   5  10  -9 18251.0 1293.24   1
  -5  10   9 21222.7 1687.67   1
   5 -10  -9 22767.7 1556.31   2
   5  10  -7 1907.11 457.760   1
  -5  10   7 1609.62 523.283   1
   5 -10  -7 1887.50 428.409   2
   5  10  -5 1246.46 403.040   1
  -5  10   5 622.520 310.144   1
   5 -10  -5 654.554 258.664   2
  -5  10   3 62816.8 2924.13   1
   5  10  -3 60821.1 2661.64   1
   5  10  -1 39603.0 2162.12   1
   5  10   1 41156.5 2288.72   1
   5  10   3 32777.2 2070.61   1
   5  10   5 5412.08 855.831   1
   5  10   7 10394.8 1201.76   1
   5  10   9 28399.2 2052.16   1
   5  10  11 12209.2 1380.73   1
   5  10  13 2794.65 688.492   1
   5 -11 -16 7234.53 1182.24   3
  -5  11  14 13099.3 1457.08   1
   5 -11 -14 13252.1 1471.61   3
   5 -11 -12 50234.8 2638.12   2
  -5  11  12 52937.1 2892.23   1
  -5  11  10 40351.9 2498.32   1
   5 -11 -10 38406.5 2153.00   2
  -5  11   8 18374.0 1654.98   1
   5  11  -8 16274.7 1318.36   1
   5 -11  -8 19556.5 1429.23   2
  -5  11   6 71779.7 3333.51   1
   5 -11  -6 70492.0 2714.15   2
   5  11  -6 65187.5 2819.12   1
   5 -11  -4 132032. 3785.01   2
  -5  11   4 126042. 4505.58   1
  -5  11   2 62677.9 3058.95   1
   5  11  -2 64542.8 2923.64   1
  -5  11   0 43181.9 2510.70   1
   5  11   0 41140.0 2369.67   1
   5  11   2 39785.2 2370.01   1
  -5  11  -2 42420.0 2441.30   1
   5  11   4 13761.0 1413.23   1
   5  11   6 14206.4 1449.22   1
   5  11   8 3544.33 807.964   1
   5  11  10-371.625 339.967   1
   5  11  12 215.770 355.126   1
  -5  12  15-29.2913 222.264   1
  -5  12  13-2.48228 228.185   1
  -5  12  11 420.736 307.327   1
  -5  12   9 1695.23 549.763   1
  -5  12   7 3749.67 783.799   1
   5  12  -7 4592.93 752.806   1
   5  12  -5 17080.6 1478.73   1
  -5  12   5 17990.0 1700.08   1
   5  12  -3 24031.3 1805.70   1
  -5  12   3 27108.9 2068.49   1
   5  12  -1 7744.86 1051.83   1
  -5  12   1 6309.32 997.361   1
   5  12   1 14013.1 1438.28   1
  -5  12  -1 14664.7 1514.22   1
  -5  12  -3 38998.4 2459.29   1
   5  12   3 37344.2 2417.01   1
   5  12   5 30744.2 2241.77   1
  -5  12  -5 33782.4 2263.45   1
   5  12   7 13710.9 1501.92   1
   5  12   9 8943.40 1251.52   1
   5  12  11 6536.56 1080.25   1
  -5  13  14 3886.19 921.448   1
  -5  13  12 3647.08 872.887   1
  -5  13  10 17457.7 1781.54   1
  -5  13   8 47599.8 2950.05   1
  -5  13   6 30666.6 2312.80   1
   5  13  -6 27715.2 1974.43   1
  -5  13   4 4310.04 886.940   1
   5  13  -4 5316.50 892.783   1
   5  13  -2 7279.09 1054.36   1
  -5  13   2 10540.9 1348.08   1
   5  13   0 34079.8 2328.41   1
  -5  13   0 30648.2 2299.11   1
  -5  13  -2 20038.7 1833.93   1
   5  13   2 21773.8 1896.51   1
  -5  13  -4 3420.96 791.607   1
   5  13   4 3886.21 828.282   1
   5  13   6-157.444 254.515   1
  -5  13  -6 585.698 322.606   1
   5  13   8 313.256 302.021   1
   5  13  10 856.309 458.534   1
  -5  14  13-1577.23 620.962   1
  -5  14  11 1017.18 504.634   1
  -5  14   9-373.858 353.761   1
   5  14  -7 303.168 272.719   1
  -5  14   7 576.519 434.585   1
   5  14  -5 24.2587 213.669   1
  -5  14   5-197.654 431.097   1
  -5  14   3 163.437 299.988   1
   5  14  -3-272.459 285.692   1
   5  14  -1 6851.59 1072.73   1
  -5  14   1 5885.18 1059.98   1
   5  14   1 3460.87 797.140   1
  -5  14  -1 3375.38 784.783   1
  -5  14  -3 2062.41 632.168   1
   5  14   3 2020.82 656.091   1
  -5  14  -5 5374.84 980.648   1
   5  14   5 5787.93 1074.89   1
   5  14   7 1993.77 747.527   1
  -5  15   8 863.333 510.662   1
   5  15  -6 310.721 313.462   1
  -5  15   6-147.159 308.394   1
   5  15  -4 691.893 416.106   1
  -5  15   4 1853.76 685.308   1
  -5  15   2 2076.21 677.300   1
   5  15  -2 1707.13 620.784   1
   5  15   0 2872.10 795.288   1
  -5  15   0 2609.03 772.947   1
  -5  15  -2 6434.16 1140.54   1
   5  15   2 4857.03 980.586   1
  -5  15  -4 1008.86 499.853   1
   5  15   4 1538.98 570.071   1
   5  16  -5 3056.01 815.678   1
   5  16  -3 3217.93 834.708   1
   5  16  -1 880.325 477.479   1
  -5  16   1 1069.67 542.632   1
  -5  16  -1 381.592 385.706   1
  -5  16  -3 5595.59 1102.21   1
   6   0 -22 5709.89 1112.28   2
   6   0 -20 1392.64 595.336   2
   6   0 -18 4257.03 834.057   2
   6   0 -16 20743.1 1624.54   3
   6   0 -16 21798.4 1725.62   2
   6   0 -14 244.041 257.394   3
   6   0 -14-18.4577 315.495   2
  -6   0  12 21910.9 670.857   1
   6   0 -12 23707.4 1435.05   3
  -6   0  12 22505.9 655.624   1
   6   0 -10 14317.0 1052.01   2
   6   0  -8 157710. 3726.29   2
   6   0  -6 49071.3 1420.56   1
   6   0  -6 45949.5 1615.76   2
   6   0  -4 72585.5 1916.09   1
   6   0  -2 50244.2 1605.44   1
   6   0   0 165948. 3600.31   1
   6   0   2 51071.6 1779.16   1
   6   0   4 183904. 4089.66   1
  -6   0  -4 177085. 4179.15   3
   6   0   6 156867. 3819.94   1
  -6   0  -6 159033. 4218.95   3
   6   0   8 23021.4 1299.33   1
  -6   0  -8 24732.1 1630.88   3
   6   0  10 17225.7 1159.22   1
  -6   0 -10 19264.5 1601.69   3
  -6   0 -12 21624.9 1851.88   3
  -6   0 -14 12124.1 1487.85   3
  -6   0 -16 1872.36 683.554   3
   6   1 -21 7114.21 1209.21   2
   6  -1 -21 3097.09 866.322   2
   6  -1 -19 6849.63 1078.03   3
   6   1 -19 4645.10 948.759   2
   6  -1 -19 5106.18 999.151   2
   6  -1 -17 2036.43 559.190   3
   6   1 -17 1878.41 587.410   2
   6  -1 -17 1857.46 568.221   2
   6  -1 -15 58719.1 2660.80   3
   6   1 -15 51742.9 2580.64   2
   6  -1 -15 53858.3 2684.89   2
   6   1 -13 82305.3 3036.95   2
   6  -1 -13 81459.5 2895.54   3
   6  -1 -13 74707.2 2978.14   2
  -6   1  13 72164.9 1705.16   1
   6  -1 -11 90871.2 2707.91   3
   6   1 -11 90437.2 2848.51   2
   6  -1 -11 90829.7 2944.67   2
   6   1  -9 429906. 7864.33   2
   6  -1  -9 440126. 8018.89   2
   6   1  -7 248009. 4375.66   1
   6   1  -7 243186. 4954.57   2
   6  -1  -5 120839. 2710.70   1
   6   1  -5 126434. 2670.95   1
   6  -1  -3 267449. 4951.54   1
   6   1  -3 265811. 4926.60   1
   6  -1  -1 307597. 5669.94   1
   6   1  -1 308455. 5655.36   1
   6   1   1 192269. 4014.45   1
   6  -1   1 186981. 3947.86   1
   6  -1   3 177749. 3937.45   1
   6   1   3 176331. 3962.74   1
  -6   1  -3 169557. 3802.75   3
   6  -1   5 161352. 3818.68   1
   6   1   5 164992. 3915.01   1
  -6   1  -5 163087. 4032.92   3
   6   1   7 3619.68 516.652   1
  -6  -1  -7 3794.75 632.087   3
   6  -1   7 3648.22 506.665   1
  -6   1  -7 3788.81 596.413   3
  -6  -1  -9 1529.30 485.074   3
  -6   1  -9 1699.37 480.629   3
   6  -1   9 2180.89 408.351   1
   6   1   9 1408.29 357.238   1
   6  -1  11 21110.2 1278.75   1
  -6  -1 -11 24536.0 1879.08   3
  -6   1 -11 24392.8 1860.81   3
   6   1  11 22165.4 1367.81   1
  -6   1 -13 1471.13 632.494   3
  -6  -1 -13 121.028 262.556   3
  -6   1 -15-256.171 342.950   3
  -6  -1 -15-718.957 474.098   3
  -6  -1 -17 1399.56 630.002   3
  -6   1 -17 98.0987 377.401   3
   6  -2 -22 2364.76 717.989   3
   6  -2 -22 2703.00 798.417   2
   6  -2 -20 726.645 438.425   3
   6   2 -20 185.792 424.075   2
   6  -2 -20 509.395 401.758   2
   6  -2 -18 486.691 364.135   2
   6  -2 -18 455.377 319.944   3
   6   2 -18 267.536 281.235   2
   6  -2 -16 5665.77 917.222   2
   6   2 -16 5893.88 904.947   2
   6  -2 -16 5061.28 786.468   3
   6  -2 -14 3435.14 597.777   3
   6   2 -14 3112.74 622.609   2
   6  -2 -14 3794.60 693.999   2
   6  -2 -12 149.926 164.401   3
  -6   2  12 55.3067 109.694   1
   6  -2 -12 339.261 265.358   2
   6  -2 -10 18.5449 128.813   3
  -6  -2  10 256.577 76.4555   1
   6   2 -10 199.017 169.426   2
   6  -2 -10 128.669 188.582   2
   6  -2  -8 309.716 150.975   3
   6   2  -8 286.136 89.5185   1
   6   2  -8 416.607 172.939   2
   6  -2  -8 255.547 189.821   2
   6   2  -6 440.777 145.588   1
   6   2  -6 508.962 173.107   2
   6  -2  -6 40.5421 130.070   2
   6   2  -4 8497.80 600.328   1
   6  -2  -2 64068.3 1929.39   1
   6   2  -2 62094.8 1891.17   1
   6  -2   0 248996. 4883.55   1
   6   2   0 251382. 4924.44   1
  -6   2   0 242895. 4117.54   3
   6  -2   2 25221.7 1212.87   1
   6   2   2 25624.3 1254.83   1
  -6   2  -2 25643.6 1070.79   3
   6  -2   4 25479.4 1262.22   1
   6   2   4 25112.7 1304.36   1
  -6   2  -4 24452.9 1243.82   3
   6  -2   6 25966.4 1314.54   1
  -6   2  -6 23257.2 1393.94   3
   6   2   6 26758.9 1394.85   1
   6  -2   8 6735.40 686.952   1
  -6   2  -8 7220.91 866.030   3
   6   2   8 7934.54 787.491   1
   6  -2  10 17335.5 1135.80   1
  -6  -2 -10 20835.6 1713.85   3
   6   2  10 20975.0 1344.91   1
  -6   2 -10 19677.3 1582.98   3
   6   2  12 17853.3 1283.77   1
  -6  -2 -12 21750.3 1929.10   3
  -6   2 -12 20253.8 1759.65   3
  -6  -2 -14 2098.58 636.825   3
  -6   2 -14 3994.64 880.812   3
  -6   2 -16-385.758 409.644   3
  -6  -2 -16-304.979 425.460   3
   6  -3 -21 22.9498 173.405   3
   6  -3 -21-470.480 461.122   2
   6  -3 -19-34.7285 349.042   3
   6   3 -19 210.116 326.628   2
   6  -3 -19 120.013 306.429   2
   6  -3 -17 388.784 218.829   3
   6   3 -17-45.9448 292.900   2
   6  -3 -17 228.829 304.338   2
   6  -3 -15 6450.62 950.821   2
   6   3 -15 6457.40 909.709   2
   6  -3 -15 6021.60 841.858   3
   6  -3 -13 13896.1 1130.55   3
   6   3 -13 15352.3 1225.24   2
  -6   3  13 14638.9 896.653   1
   6  -3 -13 18035.2 1430.16   2
  -6   3  11 14995.5 923.029   1
   6  -3 -11 12929.2 971.529   3
   6   3 -11 13081.2 1029.43   2
   6  -3 -11 13783.8 1143.52   2
   6   3  -9 18951.4 1091.51   2
   6   3  -9 18414.4 724.297   1
   6  -3  -9 20375.3 1044.56   3
   6  -3  -9 18807.8 1226.43   2
   6   3  -7 14021.0 720.605   1
   6   3  -7 16449.3 882.498   2
   6  -3  -7 14889.4 1010.39   2
   6  -3  -7 15163.5 736.647   3
   6   3  -5 32695.5 1239.12   1
   6  -3  -5 32479.0 847.784   3
   6   3  -5 32410.1 1129.09   2
   6   3  -3 38958.5 1442.94   1
   6   3  -1 11696.5 804.020   1
  -6   3  -1 21592.1 869.263   3
   6   3   1 23036.5 1200.69   1
   6  -3   1 22263.6 1142.53   1
   6  -3   3 16195.7 1004.51   1
  -6   3  -3 16332.1 934.206   3
   6   3   3 17362.2 1098.17   1
   6  -3   5 10041.5 819.638   1
  -6   3  -5 10712.2 872.975   3
   6   3   5 12701.6 969.145   1
   6  -3   7 4811.72 573.971   1
   6   3   7 4530.49 613.948   1
  -6   3  -7 3565.01 592.894   3
  -6  -3  -9 1076.28 461.650   3
  -6   3  -9 315.052 203.403   3
   6   3   9 531.084 261.983   1
   6  -3   9 442.326 211.759   1
  -6  -3 -11 118.245 279.192   3
  -6   3 -11 16.9206 280.708   3
   6   3  11 287.082 267.778   1
  -6  -3 -13 286.203 330.349   3
  -6   3 -13-98.1036 351.214   3
  -6  -3 -15-239.566 331.868   3
  -6   3 -15 226.736 323.697   3
   6  -4 -22-151.628 275.599   3
   6  -4 -20-146.362 282.122   3
   6  -4 -20 278.621 369.034   2
   6  -4 -18 250.362 302.908   3
   6   4 -18 436.616 277.757   2
   6  -4 -18 336.840 347.191   2
   6  -4 -16 1711.66 517.923   3
   6   4 -16 1517.06 497.701   2
   6  -4 -16 2230.81 638.674   2
   6  -4 -14 2617.98 559.072   3
  -6   4  14 2208.30 392.364   1
   6   4 -14 2751.22 602.191   2
   6  -4 -14 2684.48 608.220   2
   6  -4 -12 160.883 170.046   3
  -6   4  12 273.671 182.390   1
   6   4 -12 233.149 211.488   2
   6  -4 -12 297.153 272.463   2
   6   4 -10 2624.93 270.800   1
   6   4 -10 2681.88 439.854   2
   6  -4 -10 2897.40 439.545   3
   6  -4 -10 2804.31 512.269   2
   6   4  -8 16173.7 928.995   2
   6  -4  -8 17845.3 915.991   3
   6  -4  -8 16125.7 1124.05   2
   6   4  -8 15782.3 789.105   1
   6   4  -6 28.4555 84.4505   2
   6   4  -6 78.6610 105.588   1
   6   4  -4 66303.2 1562.55   2
   6   4  -4 64496.3 2009.16   1
   6  -4  -2 3506.52 209.701   3
   6   4  -2 4927.95 526.267   1
   6   4   0 31654.8 1463.07   1
   6   4   2 7574.78 740.630   1
   6   4   4 319.206 242.552   1
   6   4   6 1169.75 351.048   1
  -6   4  -6 1978.87 415.871   3
   6   4   8 430.639 246.030   1
  -6   4  -8 544.081 281.411   3
  -6   4 -10-164.766 275.558   3
   6   4  10-64.3633 198.042   1
   6   4  12 49.5480 181.449   1
  -6  -4 -12 259.492 397.191   3
  -6  -4 -14 347.710 432.893   3
  -6  -4 -16 221.225 386.302   3
   6  -5 -21 2569.90 710.691   3
   6  -5 -21 2106.53 741.738   2
   6  -5 -19 382.792 415.858   2
   6  -5 -19 531.609 378.626   3
   6  -5 -17 118.845 224.425   3
   6  -5 -17 367.682 364.054   2
   6  -5 -15 18461.8 1495.28   3
   6   5 -15 17336.0 1437.57   2
   6  -5 -15 19153.1 1631.92   2
  -6   5  13 42106.5 1859.24   1
   6   5 -13 40898.5 2038.71   2
   6  -5 -13 41433.6 2259.63   2
   6  -5 -13 39411.9 2001.90   3
   6  -5 -11 16393.1 1297.70   2
   6   5 -11 18901.7 1223.63   2
  -6   5  11 18073.6 1191.68   1
   6  -5 -11 16825.0 1154.89   3
   6  -5  -9 37113.5 1524.73   3
   6   5  -9 35069.9 1464.95   2
   6   5  -9 33729.3 1242.39   1
   6  -5  -9 37938.8 1842.72   2
   6   5  -7 32107.2 1210.40   2
   6   5  -7 28053.3 1229.35   1
   6  -5  -7 32261.2 1592.61   2
   6   5  -5 23642.4 828.676   2
   6   5  -5 23285.1 1173.61   1
   6   5  -3 159650. 2720.63   2
   6   5  -3 165847. 3863.13   1
   6   5  -1 121236. 3291.00   1
   6   5   1 404.544 199.458   1
   6   5   3 10468.8 923.948   1
   6   5   5 39355.0 1910.14   1
   6   5   7 5126.15 714.013   1
   6   5   9 3505.12 609.083   1
   6   5  11 2290.84 537.911   1
  -6  -5 -11 2121.32 696.090   3
  -6  -5 -13 125.940 320.885   3
  -6  -5 -15-1.07974 453.983   3
   6  -6 -20 1709.98 619.295   3
   6  -6 -20 778.362 417.585   2
   6  -6 -18-344.733 315.051   3
   6  -6 -18 815.804 455.428   2
   6  -6 -16 4584.64 874.402   2
   6  -6 -16 5454.32 880.130   3
   6  -6 -14-24.3676 254.890   3
  -6   6  14-39.9875 160.396   1
   6  -6 -14-144.968 294.094   2
   6  -6 -12 77.1150 167.155   3
  -6   6  12-80.5513 152.585   1
   6   6 -12 187.680 183.866   2
   6  -6 -12-264.161 350.488   2
   6  -6 -10 21743.8 1274.52   3
   6   6 -10 22841.0 1242.95   2
   6   6 -10 21837.9 1015.40   1
   6  -6 -10 22647.5 1489.03   2
  -6   6  10 23281.2 1471.39   1
   6   6  -8 797.428 221.105   2
   6   6  -8 659.811 207.459   1
   6  -6  -8 977.402 320.276   2
   6   6  -6 17912.3 756.377   2
   6  -6  -6 18877.6 1218.60   2
   6   6  -6 15760.3 994.056   1
   6   6  -4 885.404 105.949   2
   6   6  -4 822.627 233.034   1
   6   6  -2 34904.5 1644.36   1
   6   6   0 68104.9 1453.32   2
   6   6   0 70220.2 2512.55   1
   6   6   2 6134.14 755.430   1
   6   6   4 20768.6 1408.52   1
   6   6   6 85604.9 3086.68   1
   6   6   8 19286.0 1437.85   1
   6   6  10 2380.90 560.325   1
  -6  -6 -12 15308.6 1741.54   3
   6   6  12 13779.5 1281.13   1
  -6  -6 -14 3261.96 915.243   3
   6  -7 -21 2206.14 753.923   3
   6  -7 -19 4153.26 905.138   3
   6  -7 -19 6243.72 1109.84   2
   6  -7 -17 9810.81 1237.12   3
   6  -7 -17 10949.9 1373.07   2
   6  -7 -15 38512.2 2273.69   3
   6  -7 -15 36739.8 2343.63   2
  -6   7  15 40527.8 2090.62   1
   6  -7 -13 30096.4 1984.46   2
  -6   7  13 33967.2 1883.40   1
   6  -7 -13 29678.3 1823.67   3
   6  -7 -11 25075.5 1677.29   2
  -6   7  11 26542.5 1651.25   1
   6  -7 -11 23744.9 1464.73   3
  -6   7   9 183753. 4859.99   1
   6  -7  -9 178464. 4744.58   2
   6   7  -9 172951. 3990.70   1
   6  -7  -7 314658. 6598.38   2
   6   7  -7 299400. 6104.21   1
   6   7  -5 89848.1 2813.34   1
   6   7  -3 139875. 3806.83   1
   6   7  -1 145475. 4015.59   1
   6   7   1 25691.8 1551.29   1
   6   7   3 102608. 3424.63   1
   6   7   5 93088.3 3346.43   1
   6   7   7 10233.8 1077.81   1
   6   7   9 5978.92 860.186   1
   6   7  11 6282.93 898.752   1
   6   7  13 478.363 360.953   1
  -6  -7 -13 362.327 337.353   3
   6  -8 -20 184.191 299.035   3
   6  -8 -20 619.331 482.644   2
   6  -8 -18-374.443 348.347   3
   6  -8 -18 355.280 320.367   2
   6  -8 -16 9714.35 1217.39   3
   6  -8 -16 11008.1 1380.27   2
   6  -8 -14 1592.56 473.505   3
  -6   8  14 1325.82 401.996   1
   6  -8 -14 1193.76 465.106   2
  -6   8  12 636.083 325.214   1
   6  -8 -12 248.254 182.176   3
   6  -8 -12 259.125 237.585   2
   6  -8 -10 8168.10 940.074   2
  -6   8  10 9030.92 1024.75   1
   6   8 -10 8222.48 731.127   1
  -6   8   8 938.410 329.189   1
   6   8  -8 982.019 307.859   1
   6  -8  -8 377.068 262.482   2
   6   8  -6 16134.4 1145.48   1
   6  -8  -6 16185.2 1190.62   2
   6   8  -4 5303.04 699.785   1
   6   8  -2 6173.52 765.267   1
   6   8   0 30835.6 1773.36   1
   6   8   2 59207.4 2573.35   1
   6   8   4 33139.2 1949.69   1
   6   8   6 52958.6 2566.23   1
   6   8   8 25170.8 1779.53   1
   6   8  10 7085.74 976.210   1
   6   8  12 8171.42 1051.92   1
  -6  -8 -14 3450.15 954.785   3
   6  -9 -19 787.077 508.118   2
   6  -9 -19 2291.41 684.720   3
   6  -9 -17 4656.85 908.094   3
   6  -9 -17 5784.71 1053.96   2
   6  -9 -15 11349.3 1340.14   2
  -6   9  15 11831.9 1281.74   1
   6  -9 -15 10035.5 1221.01   3
  -6   9  13 19136.4 1570.56   1
   6  -9 -13 17219.6 1464.71   3
   6  -9 -13 19623.6 1651.85   2
   6  -9 -11 40431.9 2225.08   2
  -6   9  11 39280.1 2276.18   1
   6  -9  -9 57056.2 2535.22   2
  -6   9   9 56123.3 2721.57   1
   6   9  -9 51055.5 2115.58   1
   6   9  -7 49310.0 2163.37   1
  -6   9   7 55621.0 2673.25   1
   6  -9  -7 51299.2 2296.94   2
   6   9  -5 44442.3 2110.83   1
   6   9  -3 148966. 4334.10   1
   6   9  -1 119328. 3889.55   1
   6   9   1 5075.18 763.328   1
   6   9   3 11800.0 1193.88   1
   6   9   5 24403.7 1768.37   1
   6   9   7 20365.7 1649.22   1
   6   9   9 8018.21 1073.04   1
   6   9  11 622.979 315.018   1
   6   9  13-224.877 287.801   1
  -6  -9 -13-681.500 534.674   3
   6 -10 -18 288.292 363.777   2
   6 -10 -16 1025.84 478.403   3
   6 -10 -16 498.676 365.145   2
  -6  10  14 1027.17 410.434   1
   6 -10 -14 1351.90 502.004   3
   6 -10 -14 2232.15 583.608   2
  -6  10  12 4152.75 775.179   1
   6 -10 -12 2467.31 603.105   2
  -6  10  10 908.936 383.647   1
   6 -10 -10 776.363 344.866   2
   6  10  -8 9559.12 964.630   1
  -6  10   8 11132.1 1241.27   1
   6 -10  -8 10983.6 1082.74   2
   6  10  -6 241.497 227.631   1
  -6  10   6-7.98474 303.220   1
   6 -10  -6-185.593 190.592   2
   6  10  -4 1447.25 399.395   1
   6  10  -2 474.478 249.561   1
   6  10   0 6458.03 906.266   1
   6  10   2 26844.0 1865.12   1
   6  10   4 10147.0 1157.51   1
   6  10   6 2668.88 641.853   1
   6  10   8 3650.99 747.435   1
   6  10  10 4263.85 821.748   1
   6  10  12 2654.06 722.754   1
  -6  11  15-570.897 363.781   1
   6 -11 -15-471.333 406.911   2
  -6  11  13 800.186 428.178   1
   6 -11 -13 646.628 368.948   2
   6 -11 -11 674.348 363.414   2
  -6  11  11 1355.16 515.661   1
  -6  11   9 511.204 349.314   1
   6 -11  -9 443.168 270.907   2
   6  11  -9 187.667 161.006   1
  -6  11   7 328.101 342.185   1
   6 -11  -7 165.821 261.256   2
   6  11  -7 482.839 287.059   1
   6  11  -5 3094.00 618.043   1
  -6  11   5 3001.06 704.525   1
   6 -11  -5 2788.50 552.399   2
   6  11  -3 238.351 289.464   1
  -6  11   3 201.074 302.513   1
   6  11  -1 258.555 333.028   1
   6  11   1 5659.53 908.275   1
   6  11   3 1216.30 482.888   1
   6  11   5 213.950 248.212   1
   6  11   7 11.5036 304.979   1
   6  11   9-190.049 315.136   1
   6  11  11-198.946 286.695   1
   6  11  13 483.084 349.204   1
  -6  12  14-126.005 372.465   1
  -6  12  12 485.510 343.229   1
  -6  12  10 459.881 382.588   1
  -6  12   8 1863.12 605.963   1
   6  12  -8 2083.71 540.899   1
   6  12  -6 1210.49 421.509   1
  -6  12   6 893.834 461.065   1
   6  12  -4 8831.11 1083.19   1
  -6  12   4 8958.36 1218.52   1
   6  12  -2 778.391 400.326   1
  -6  12   2 300.362 348.122   1
   6  12   0 16518.5 1560.76   1
  -6  12   0 15553.1 1592.80   1
  -6  12  -2 3211.93 739.755   1
   6  12   2 2975.49 709.557   1
  -6  12  -4-111.019 230.559   1
   6  12   4 183.632 349.592   1
   6  12   6 1378.78 543.647   1
  -6  12  -6 2946.76 678.424   1
   6  12   8-598.490 383.488   1
   6  12  10 66.4116 277.077   1
  -6  13  15 6583.38 1182.19   1
  -6  13  13 7274.54 1198.24   1
  -6  13  11 1501.83 563.990   1
  -6  13   9 27721.3 2260.51   1
   6  13  -7 36301.0 2247.69   1
  -6  13   7 38583.7 2655.18   1
   6  13  -5 8013.64 1071.77   1
  -6  13   5 7164.08 1154.98   1
   6  13  -3 11263.9 1292.76   1
  -6  13   3 14628.6 1601.95   1
   6  13  -1 13546.1 1459.74   1
  -6  13   1 20040.7 1873.67   1
  -6  13  -1 7514.53 1150.10   1
   6  13   1 7195.72 1116.24   1
  -6  13  -3 11085.1 1387.61   1
   6  13   3 11028.3 1388.67   1
  -6  13  -5 9284.72 1269.97   1
   6  13   5 8816.47 1258.55   1
   6  13   7 1373.42 564.594   1
   6  13   9 2498.85 716.203   1
  -6  14  12-587.761 408.802   1
  -6  14  10 4563.45 925.132   1
  -6  14   8 407.911 390.869   1
  -6  14   6 3355.40 865.478   1
   6  14  -6 3661.59 769.743   1
  -6  14   4 1592.52 566.399   1
   6  14  -4 962.375 444.845   1
  -6  14   2 3435.34 873.900   1
   6  14  -2 3239.01 747.875   1
  -6  14   0 10501.6 1426.35   1
   6  14   0 8085.08 1178.68   1
   6  14   2 2929.58 773.512   1
  -6  14  -2 2472.83 717.962   1
  -6  14  -4 10670.5 1433.22   1
   6  14   4 9838.06 1361.78   1
   6  14   6 15051.1 1721.84   1
  -6  15   9 32837.9 2678.88   1
  -6  15   7 18586.6 1991.39   1
   6  15  -5 10871.8 1373.13   1
  -6  15   5 13009.3 1653.36   1
   6  15  -3 20866.2 1943.29   1
  -6  15   3 24090.0 2244.54   1
   6  15  -1 29341.6 2347.36   1
  -6  15   1 31556.2 2561.65   1
  -6  15  -1 22774.6 2166.25   1
   6  15   1 21280.0 2045.48   1
  -6  15  -3 14458.8 1718.60   1
   6  15   3 12182.9 1555.47   1
   6  16  -6-721.561 429.458   1
   6  16  -4-394.102 343.268   1
   6  16  -2 3160.17 814.018   1
   7   0 -21-295.507 392.784   2
   7   0 -19-142.430 341.502   2
   7   0 -17 5.28957 246.391   2
   7   0 -15 23.9210 259.734   2
  -7   0  13-11.9017 49.6593   1
   7   0 -13 52.3002 190.772   2
   7   0 -11 191.686 165.730   2
   7   0  -9 275.595 215.052   2
   7   0  -7 188.040 111.391   1
   7   0  -7 13.8937 160.536   2
   7   0  -5 44.5868 118.033   1
   7   0  -3 199.143 123.943   1
   7   0  -1 243.373 192.253   1
   7   0   1 56.4180 154.743   1
   7   0   3 762.693 264.408   1
  -7   0  -5 358.612 244.183   3
   7   0   5 451.412 224.718   1
   7   0   7 779.875 289.164   1
  -7   0  -7 289.204 281.277   3
   7   0   9 199.163 199.912   1
  -7   0  -9 453.968 306.571   3
  -7   0 -11-32.6687 272.541   3
   7   0  11 68.1485 160.202   1
  -7   0 -13 87.5002 289.717   3
  -7   0 -15 445.563 413.051   3
   7   1 -22 623.840 479.419   2
   7  -1 -22-121.483 483.107   2
   7   1 -20 32.4940 359.042   2
   7  -1 -20 459.116 410.125   2
   7   1 -18 2668.75 618.785   2
   7  -1 -18 2700.88 674.892   2
   7  -1 -18 2042.86 574.115   3
   7  -1 -16 13528.3 1305.15   3
   7   1 -16 15379.0 1428.94   2
   7  -1 -16 15815.1 1495.60   2
   7  -1 -14 6902.58 824.325   3
   7  -1 -14 8154.24 978.580   2
   7   1 -14 8825.32 1000.60   2
   7   1 -12 1369.74 378.767   2
   7  -1 -12 1735.55 455.353   2
   7  -1 -12 1768.53 370.585   3
   7   1 -10 15564.8 1091.08   2
   7  -1 -10 16956.7 1166.79   2
   7   1  -8 70027.8 1820.89   1
   7  -1  -8 73347.1 2403.30   2
   7   1  -8 72629.5 2280.36   2
   7   1  -6 71207.4 1956.77   1
   7   1  -6 68035.1 2053.65   2
   7  -1  -6 72450.9 2018.48   1
   7  -1  -4 56565.9 1773.33   1
   7   1  -4 50908.5 1690.90   1
   7  -1  -2 30755.2 1308.82   1
   7   1  -2 28454.0 1265.03   1
   7  -1   0 93308.8 2590.89   1
   7   1   0 87308.1 2550.13   1
   7  -1   2 76179.2 2359.33   1
  -7   1  -2 71191.1 2091.08   3
   7   1   2 68851.6 2299.38   1
   7  -1   4 11319.3 885.724   1
  -7   1  -4 13159.7 947.603   3
   7  -1   6 12985.1 973.212   1
  -7  -1  -6 9271.18 964.966   3
  -7   1  -6 11903.8 1017.86   3
   7   1   6 10979.8 924.581   1
  -7   1  -8 2731.85 567.609   3
   7  -1   8 3001.56 493.350   1
  -7  -1  -8 3281.75 666.834   3
   7   1   8 2427.13 475.921   1
  -7  -1 -10 556.060 413.101   3
  -7   1 -10 1115.50 449.686   3
   7  -1  10 392.627 238.851   1
   7   1  10 24.1188 172.742   1
  -7  -1 -12 1124.26 493.714   3
  -7   1 -12 872.172 383.859   3
  -7   1 -14 123.562 341.645   3
  -7  -1 -14 559.709 454.528   3
  -7  -1 -16-39.4696 300.799   3
  -7   1 -16 368.906 410.629   3
   7  -2 -21 854.630 459.669   3
   7   2 -21 954.148 608.051   2
   7  -2 -21 258.975 386.677   2
   7  -2 -19 10886.7 1339.21   3
   7   2 -19 11622.5 1422.38   2
   7  -2 -19 12846.9 1522.18   2
   7  -2 -17 8138.80 1054.11   3
   7   2 -17 8111.23 1095.35   2
   7  -2 -17 10439.1 1258.62   2
   7  -2 -15 863.599 345.928   3
   7   2 -15 865.423 393.071   2
   7  -2 -15 954.790 424.341   2
   7   2 -13 8503.99 944.990   2
   7  -2 -13 8832.28 993.447   2
  -7   2  13 8047.87 612.582   1
   7  -2 -13 8764.23 878.095   3
   7  -2 -11 1341.15 326.643   3
   7   2 -11 1096.97 343.831   2
   7  -2 -11 870.569 370.512   2
   7   2  -9 2767.79 309.956   1
   7  -2  -9 3329.00 404.513   3
   7   2  -9 3017.59 457.527   2
   7  -2  -9 2994.46 489.262   2
   7   2  -7 41627.1 1383.08   1
   7   2  -7 42614.6 1582.77   2
   7  -2  -7 37938.5 1692.71   2
   7   2  -5 13224.7 790.845   1
   7   2  -3 44125.3 1603.73   1
   7  -2  -3 45537.2 1658.03   1
  -7   2   1 2434.20 209.125   3
   7  -2  -1 2264.92 362.717   1
   7   2  -1 1874.12 347.808   1
   7  -2   1 22338.5 1193.03   1
   7   2   1 20353.6 1169.30   1
  -7   2  -1 21592.5 919.344   3
   7  -2   3 57489.9 2063.37   1
  -7   2  -3 55716.0 1908.55   3
   7   2   3 58183.0 2131.39   1
   7  -2   5 11381.0 901.426   1
   7   2   5 10016.2 888.418   1
  -7  -2  -7 1336.59 449.150   3
  -7   2  -7 1803.09 452.388   3
   7  -2   7 1169.65 321.019   1
   7   2   7 1076.60 320.733   1
   7  -2   9 18874.3 1232.16   1
  -7  -2  -9 18184.3 1586.36   3
  -7   2  -9 18067.5 1485.51   3
   7   2   9 17326.1 1266.05   1
   7   2  11 8248.37 911.271   1
  -7  -2 -11 7923.13 1166.90   3
  -7  -2 -13 4177.45 942.487   3
  -7   2 -13 4283.61 904.909   3
  -7  -2 -15 6861.53 1259.22   3
  -7   2 -15 7755.71 1295.94   3
   7  -3 -22 707.052 469.348   3
   7  -3 -20 2446.40 670.627   3
   7   3 -20 1952.79 655.365   2
   7  -3 -20 1913.80 694.434   2
   7  -3 -18 21762.9 1812.48   3
   7   3 -18 19668.2 1762.30   2
   7  -3 -18 21243.6 1903.80   2
   7  -3 -16 8954.82 1046.24   3
   7   3 -16 8384.26 1045.67   2
   7  -3 -16 8748.21 1119.89   2
  -7   3  14 11260.9 790.268   1
   7   3 -14 11256.1 1101.03   2
   7  -3 -14 10970.9 1167.94   2
   7  -3 -14 12213.5 1095.09   3
  -7   3  12 157772. 3687.26   1
   7  -3 -12 152255. 3964.91   3
   7   3 -12 158229. 4257.19   2
   7  -3 -12 160663. 4562.40   2
   7  -3 -10 157575. 3619.22   3
   7   3 -10 164952. 3956.37   2
   7  -3 -10 167554. 4320.45   2
   7  -3  -8 35804.9 1248.61   3
   7   3  -8 35669.2 1274.36   1
   7   3  -8 35628.5 1446.78   2
   7  -3  -8 39089.3 1762.42   2
   7  -3  -6 253043. 4149.04   3
   7   3  -6 264039. 4908.18   1
   7   3  -6 250481. 4757.11   2
   7   3  -4 600229. 9982.99   1
   7   3  -2 179770. 4063.40   1
   7   3   0 246563. 5238.56   1
   7  -3   0 254625. 5236.65   1
   7  -3   2 304667. 6050.08   1
   7   3   2 296756. 6105.70   1
  -7   3  -2 292466. 5468.31   3
   7  -3   4 40690.1 1753.79   1
   7   3   4 37579.3 1764.04   1
  -7   3  -4 38238.8 1640.75   3
   7  -3   6 42671.7 1857.61   1
  -7   3  -6 41770.6 1949.97   3
   7   3   6 39641.6 1872.98   1
   7  -3   8 37330.2 1765.86   1
  -7   3  -8 38773.4 2094.97   3
   7   3   8 35534.9 1843.07   1
  -7  -3 -10 4542.07 874.015   3
  -7   3 -10 4534.20 803.278   3
   7   3  10 4060.55 650.990   1
  -7  -3 -12 2342.37 695.858   3
   7   3  12 2054.14 473.952   1
  -7   3 -12 2203.48 638.957   3
  -7  -3 -14 1539.76 620.955   3
  -7   3 -14 1736.32 607.715   3
  -7  -3 -16 389.966 427.566   3
   7  -4 -21 2498.06 804.983   2
   7  -4 -21 1722.48 605.795   3
   7  -4 -19 6796.72 1092.56   3
   7   4 -19 6875.34 1063.40   2
   7  -4 -19 5745.40 1080.61   2
   7   4 -17 2492.33 632.701   2
   7  -4 -17 1963.05 598.125   2
   7  -4 -17 2986.75 651.458   3
   7  -4 -15 15861.0 1340.43   3
   7  -4 -15 16809.4 1504.03   2
   7   4 -15 16104.9 1386.21   2
   7  -4 -13 75279.1 2733.81   3
   7   4 -13 76255.9 2835.46   2
   7  -4 -13 74433.9 3067.80   2
  -7   4  13 78958.5 2535.78   1
   7   4 -11 5263.27 636.005   2
   7  -4 -11 5086.92 729.253   2
   7   4 -11 4718.11 363.134   1
   7  -4 -11 6364.70 659.157   3
   7  -4  -9 16406.7 909.095   3
   7   4  -9 16733.2 838.097   1
   7   4  -9 16502.0 992.968   2
   7  -4  -9 17389.2 1236.29   2
   7   4  -7 358.659 171.753   1
   7  -4  -7 347.742 116.087   3
   7   4  -7 228.713 148.318   2
   7  -4  -7 571.032 290.655   2
   7  -4  -5 663.791 91.9625   3
   7   4  -5 370.046 204.548   1
   7   4  -5 355.479 144.334   2
   7   4  -3 6948.55 667.784   1
   7   4  -1 569.440 228.134   1
   7   4   1 48584.9 1982.72   1
   7   4   3 87688.5 2876.75   1
  -7   4  -5 13574.7 1014.72   3
   7   4   5 12469.3 1049.38   1
   7   4   7 14682.7 1169.96   1
  -7   4  -7 14156.7 1180.88   3
   7   4   9 40950.5 2068.24   1
  -7   4  -9 41783.6 2288.33   3
  -7  -4 -11 9527.78 1335.41   3
   7   4  11 8315.89 950.110   1
  -7   4 -11 9605.12 1195.90   3
  -7  -4 -13 3874.10 945.832   3
  -7  -4 -15 9615.52 1487.58   3
   7  -5 -22 446.712 392.642   3
   7  -5 -20 1235.06 446.608   3
   7  -5 -20 1524.66 612.971   2
   7   5 -18 13691.3 1436.10   2
   7  -5 -18 14021.2 1586.62   2
   7  -5 -18 15884.1 1546.95   3
   7  -5 -16 17041.5 1456.93   3
   7   5 -16 17229.3 1488.89   2
   7  -5 -16 17831.9 1632.90   2
   7  -5 -14 11781.1 1096.25   3
   7   5 -14 10454.6 1057.40   2
   7  -5 -14 14067.5 1357.02   2
  -7   5  14 11460.2 977.595   1
   7   5 -12 53675.2 2207.01   2
   7  -5 -12 53303.8 2515.82   2
   7  -5 -12 54425.5 2183.35   3
  -7   5  12 57123.9 2257.92   1
   7   5 -10 58221.9 1712.30   1
   7   5 -10 59475.1 2091.54   2
   7  -5 -10 58060.1 2491.39   2
   7  -5 -10 59170.1 2026.31   3
   7  -5  -8 68170.2 1910.12   3
   7   5  -8 66660.9 1998.42   2
   7   5  -8 63019.8 1985.90   1
   7  -5  -8 67672.9 2518.02   2
   7  -5  -6 333431. 5436.48   3
   7   5  -6 331432. 5648.30   2
   7   5  -6 327484. 6283.46   1
   7   5  -4 292766. 4819.42   2
   7   5  -4 291083. 5881.76   1
   7  -5  -2 69988.3 1439.76   3
   7   5  -2 74089.4 2460.30   1
   7   5   0 100649. 3089.52   1
   7   5   2 150225. 4069.99   1
   7   5   4 67918.4 2620.73   1
   7   5   6 26616.5 1629.37   1
   7   5   8 18019.3 1382.41   1
   7   5  10 3847.16 672.444   1
  -7  -5 -12 1879.75 649.306   3
   7   5  12 1468.33 445.740   1
  -7  -5 -14 1669.68 786.711   3
   7  -6 -21 1112.01 532.857   3
   7  -6 -21 990.021 548.247   2
   7  -6 -19 5413.14 935.692   3
   7  -6 -19 5600.29 1062.64   2
   7  -6 -17 4620.69 822.921   3
   7  -6 -17 4335.14 900.246   2
   7  -6 -15 406.716 257.397   3
   7   6 -15 1134.26 417.892   2
  -7   6  15 412.048 246.368   1
   7  -6 -15 724.201 414.630   2
   7  -6 -13 647.580 296.653   3
  -7   6  13 236.935 250.892   1
   7   6 -13 167.822 177.392   2
   7  -6 -13-126.258 337.976   2
  -7   6  11 6477.51 793.977   1
   7  -6 -11 7610.47 761.263   3
   7   6 -11 7300.33 736.906   2
   7  -6 -11 5675.35 805.277   2
   7  -6  -9 30198.0 1341.48   3
   7   6  -9 28315.1 1281.07   2
   7   6  -9 27577.1 1273.27   1
   7  -6  -9 30155.5 1728.52   2
   7   6  -7 1064.36 277.268   1
   7   6  -7 1143.95 222.062   2
   7  -6  -7 800.514 261.074   2
   7   6  -5 20908.5 721.859   2
   7   6  -5 19537.0 1185.69   1
   7   6  -3 35330.1 821.683   2
   7   6  -3 38617.8 1763.65   1
   7   6  -1 401.958 101.951   2
   7   6  -1 70.2132 214.950   1
   7   6   1 1106.08 336.215   1
   7   6   3 4120.47 639.990   1
   7   6   5 12811.8 1140.19   1
   7   6   7 21205.4 1527.92   1
   7   6   9 8505.04 999.777   1
   7   6  11 1516.29 462.029   1
  -7  -6 -11 1881.38 665.678   3
  -7  -6 -13 544.148 343.549   3
   7  -7 -20 1059.47 473.866   3
   7  -7 -20 592.858 563.176   2
   7  -7 -18-362.376 319.697   3
   7  -7 -18-851.432 477.870   2
   7  -7 -16 345.042 254.557   3
   7  -7 -16 462.667 264.021   2
   7  -7 -14 1339.26 397.847   3
   7  -7 -14 782.159 388.906   2
  -7   7  14 958.969 344.041   1
  -7   7  12 1950.28 486.976   1
   7  -7 -12 2029.40 529.426   2
   7  -7 -12 2390.67 462.023   3
   7  -7 -10 8414.33 774.337   3
   7   7 -10 9569.09 754.353   1
   7   7 -10 9056.72 733.086   2
   7  -7 -10 9718.28 1017.35   2
  -7   7  10 10469.4 1056.43   1
   7   7  -8 10887.7 672.853   2
   7  -7  -8 8947.72 944.453   2
   7   7  -8 9097.33 787.163   1
   7   7  -6 581.164 265.921   1
   7   7  -4 709.302 251.120   1
   7   7  -2 35646.9 1813.77   1
   7   7   0 11058.9 1033.93   1
   7   7   2 564.772 324.290   1
   7   7   4 7584.56 915.630   1
   7   7   6 2612.60 592.085   1
   7   7   8-53.0979 221.748   1
   7   7  10 291.539 264.762   1
   7   7  12 159.517 248.432   1
  -7  -7 -12-950.947 559.569   3
  -7  -7 -14 726.585 543.109   3
   7  -8 -19 1647.69 591.383   3
   7  -8 -19 2214.91 737.937   2
   7  -8 -17 2010.99 590.281   3
   7  -8 -17 1331.74 614.424   2
  -7   8  15 659.880 335.414   1
   7  -8 -15 841.149 428.118   2
  -7   8  13 76.1301 184.918   1
   7  -8 -13-81.8699 230.833   3
   7  -8 -13-79.5258 292.736   2
   7  -8 -11 816.202 312.237   3
   7  -8 -11 878.820 364.213   2
  -7   8  11 683.072 372.861   1
  -7   8   9 6199.81 855.159   1
   7  -8  -9 6074.37 817.049   2
   7   8  -9 4878.14 607.338   1
   7  -8  -7 7360.13 847.826   2
   7   8  -7 7403.17 780.103   1
   7   8  -5 22110.5 1412.21   1
   7   8  -3 35185.2 1853.85   1
   7   8  -1 9158.39 971.201   1
   7   8   1 17340.4 1372.96   1
   7   8   3 1581.87 489.761   1
   7   8   5 2672.36 584.706   1
   7   8   7 854.110 383.478   1
   7   8   9 684.677 397.106   1
   7   8  11-99.8157 252.704   1
  -7  -8 -13 255.571 390.352   3
   7  -9 -18 3970.40 915.144   2
   7  -9 -16 9511.04 1192.51   3
   7  -9 -16 8991.36 1241.75   2
   7  -9 -14 1430.68 443.385   3
  -7   9  14 2418.30 608.837   1
   7  -9 -14 1253.10 472.537   2
  -7   9  12 10712.4 1197.80   1
   7  -9 -12 9040.63 979.893   3
   7  -9 -12 11068.5 1208.30   2
   7  -9 -10 23497.7 1672.90   2
  -7   9  10 24989.2 1828.51   1
  -7   9   8 20584.5 1631.03   1
   7  -9  -8 21646.5 1523.69   2
   7   9  -8 17546.9 1265.43   1
   7  -9  -6 45658.0 2200.81   2
   7   9  -6 43117.3 2089.25   1
   7   9  -4 29721.6 1746.26   1
   7   9  -2 19813.4 1468.19   1
   7   9   0 60121.8 2703.15   1
   7   9   2 38566.4 2188.79   1
   7   9   4 2383.82 604.869   1
   7   9   6 5210.19 876.646   1
   7   9   8 7483.53 1028.66   1
   7   9  10 173.751 231.678   1
   7   9  12 1544.54 520.756   1
   7 -10 -19 2867.71 799.741   2
   7 -10 -17-99.1952 290.895   2
  -7  10  15 1959.60 574.918   1
   7 -10 -15 1359.26 526.441   2
   7 -10 -13 25892.1 1946.45   2
  -7  10  13 25001.1 1939.46   1
  -7  10  11 5325.40 881.846   1
   7 -10 -11 4474.13 769.371   2
  -7  10   9 2438.77 610.143   1
   7  10  -9 1903.12 445.406   1
   7 -10  -9 2918.59 623.243   2
  -7  10   7 308.626 315.103   1
   7  10  -7 368.848 204.713   1
   7 -10  -7 347.218 244.927   2
   7  10  -5 478.922 270.570   1
   7  10  -3 9020.85 1024.42   1
   7  10  -1 959.821 357.098   1
   7  10   1 6190.36 906.740   1
   7  10   3 15562.6 1446.08   1
   7  10   5 568.378 395.400   1
   7  10   7 3231.04 702.204   1
   7  10   9 19297.2 1760.32   1
   7  10  11 5540.36 948.522   1
   7 -11 -16 3795.79 884.645   2
  -7  11  14 7837.46 1139.53   1
   7 -11 -14 7650.94 1112.39   2
  -7  11  12 65144.7 3323.40   1
   7 -11 -12 64198.7 3092.75   2
  -7  11  10 49604.7 2865.34   1
   7 -11 -10 55256.5 2701.42   2
   7 -11  -8 10164.2 1091.02   2
  -7  11   8 10580.8 1306.48   1
   7  11  -8 8728.90 987.569   1
  -7  11   6 43527.6 2652.87   1
   7 -11  -6 47179.9 2327.58   2
   7  11  -6 40004.7 2222.37   1
   7  11  -4 91491.1 3545.71   1
   7  11  -2 81747.6 3416.94   1
   7  11   0 86960.8 3596.53   1
   7  11   2 51308.9 2781.26   1
   7  11   4 12180.5 1366.95   1
   7  11   6 9986.26 1289.44   1
   7  11   8 11169.1 1356.40   1
   7  11  10 1237.71 499.984   1
  -7  12  15 2842.98 759.682   1
  -7  12  13 1838.80 613.871   1
  -7  12  11 2062.28 631.900   1
  -7  12   9 2834.63 729.589   1
   7  12  -7 1354.19 413.554   1
   7 -12  -7 2421.30 571.529   2
  -7  12   7 2965.30 725.737   1
  -7  12   5 2146.97 661.797   1
   7  12  -5 1559.75 483.864   1
   7 -12  -5 2493.29 546.968   2
  -7  12   3 7861.29 1166.63   1
   7  12  -3 6275.70 951.852   1
  -7  12   1 2212.14 576.954   1
   7  12  -1 1500.68 482.751   1
   7  12   1 4687.88 862.996   1
   7  12   3 8443.11 1175.15   1
   7  12   5 3004.85 758.190   1
   7  12   7 5951.73 1057.56   1
   7  12   9 9351.80 1324.10   1
  -7  13  14 5252.82 1012.43   1
  -7  13  12 3938.55 896.257   1
  -7  13  10 6811.95 1145.27   1
  -7  13   8 24736.8 2170.45   1
   7  13  -8 19466.8 1629.82   1
  -7  13   6 36483.0 2617.25   1
   7  13  -6 35201.5 2273.10   1
  -7  13   4 22941.6 2047.30   1
   7  13  -4 21972.7 1822.46   1
  -7  13   2 13420.6 1589.57   1
   7  13  -2 13232.2 1441.28   1
  -7  13   0 17334.9 1793.37   1
   7  13   0 16690.7 1654.28   1
  -7  13  -2 21417.0 1981.44   1
   7  13   2 18728.1 1792.30   1
  -7  13  -4 8858.20 1267.59   1
   7  13   4 7131.47 1136.08   1
   7  13   6 2497.78 774.170   1
  -7  14  11-10.5051 326.525   1
  -7  14   9 736.480 493.075   1
  -7  14   7 509.883 383.035   1
   7  14  -7 582.891 372.420   1
  -7  14   5 1450.72 588.820   1
   7  14  -5 401.794 375.569   1
   7  14  -3-25.8345 326.990   1
  -7  14   3 825.936 415.253   1
  -7  14   1 309.973 275.864   1
   7  14  -1 154.369 266.457   1
  -7  14  -1 2556.93 740.259   1
   7  14   1 3321.95 813.554   1
  -7  14  -3 744.503 462.950   1
   7  14   3 1165.15 524.265   1
   7  14   5 2096.34 720.408   1
  -7  14  -5 1473.26 588.248   1
  -7  15   8 1755.35 644.382   1
   7  15  -6 1734.05 550.241   1
  -7  15   6 855.854 549.564   1
  -7  15   4 1366.24 656.905   1
   7  15  -4 865.394 416.810   1
  -7  15   2 2363.00 729.627   1
   7  15  -2 2987.19 750.996   1
  -7  15   0-195.884 314.172   1
   7  15   0-859.925 469.579   1
  -7  15  -2 913.416 517.314   1
  -7  15  -4 246.968 400.557   1
   7  16  -5-315.707 322.784   1
   8   0 -22 5139.92 1084.56   2
   8   0 -20 3042.51 766.190   2
   8   0 -18 12563.5 1416.97   2
   8   0 -16 41968.7 2415.49   2
   8   0 -14 3179.11 618.294   2
   8   0 -12 14185.7 1157.03   2
   8   0 -10 61523.0 2327.18   2
   8   0  -8 14964.0 854.458   1
   8   0  -8 15266.7 1033.04   2
   8   0  -6 20309.6 1030.53   1
   8   0  -4 7271.92 643.792   1
   8   0  -2 16504.3 1007.06   1
   8   0   0 33817.9 1538.05   1
   8   0   2 16928.8 1105.16   1
  -8   0  -4 5527.06 679.307   3
   8   0   4 5294.45 640.719   1
  -8   0  -6 160779. 4534.73   3
   8   0   6 159471. 4199.16   1
   8   0   8 12105.6 1045.46   1
  -8   0  -8 10842.4 1166.00   3
  -8   0 -10 543.274 316.156   3
   8   0  10 438.459 181.385   1
  -8   0 -12 9382.33 1282.15   3
  -8   0 -14 1669.91 641.616   3
   8   1 -21 1694.34 639.401   2
   8  -1 -21 2194.79 781.681   2
   8   1 -19 2646.32 695.966   2
   8  -1 -19 2070.40 668.826   2
   8   1 -17 2845.76 675.651   2
   8  -1 -17 2611.49 688.594   2
   8   1 -15 44432.1 2360.87   2
   8  -1 -15 44604.6 2407.02   2
   8   1 -13 74356.9 2848.21   2
   8  -1 -13 71656.6 2877.01   2
   8   1 -11 23043.0 1392.05   2
   8  -1 -11 20835.9 1378.23   2
   8   1  -9 136165. 2974.89   1
   8   1  -9 135009. 3525.45   2
   8  -1  -9 138945. 3735.76   2
   8   1  -7 285930. 5225.87   1
   8   1  -7 271963. 5431.42   2
   8  -1  -7 278857. 5294.28   1
   8  -1  -5 182454. 3942.43   1
   8   1  -5 187251. 3943.01   1
  -8   1   5 173488. 3099.97   3
   8  -1  -3 533179. 9259.21   1
   8   1  -3 542404. 9255.44   1
   8  -1  -1 294879. 5978.04   1
   8   1  -1 310208. 6046.40   1
   8  -1   1 65436.0 2272.11   1
  -8   1  -1 64485.4 1922.51   3
   8   1   1 70955.3 2372.93   1
   8   1   3 78750.4 2607.21   1
   8  -1   3 74244.3 2517.56   1
  -8   1  -3 71664.3 2362.80   3
   8  -1   5 53591.9 2152.83   1
  -8   1  -5 54138.0 2241.86   3
   8   1   5 56908.1 2252.84   1
  -8  -1  -5 55897.9 2344.60   3
  -8  -1  -7 41797.9 2260.52   3
  -8   1  -7 42962.1 2180.64   3
   8   1   7 47406.5 2099.71   1
   8  -1   7 43448.9 1979.71   1
   8  -1   9 25632.9 1544.48   1
  -8  -1  -9 32597.7 2146.03   3
   8   1   9 27167.8 1635.87   1
  -8   1  -9 33550.8 2108.26   3
   8   1  11 14461.2 1212.27   1
  -8   1 -11 16947.5 1616.87   3
  -8  -1 -11 16169.1 1640.50   3
  -8  -1 -13 372.910 327.946   3
  -8   1 -13 847.644 460.447   3
  -8  -1 -15-99.6305 320.594   3
  -8   1 -15 627.071 450.682   3
   8   2 -22 3595.55 927.890   2
   8  -2 -22 5388.73 1141.08   2
   8   2 -20 1496.65 616.203   2
   8  -2 -20 859.928 458.525   2
   8  -2 -18 699.929 381.027   3
   8   2 -18 702.298 346.609   2
   8  -2 -18 961.498 412.962   2
   8  -2 -16 6686.26 877.683   3
   8  -2 -16 7783.28 1043.57   2
   8   2 -16 5831.90 871.944   2
   8  -2 -14 6063.10 743.092   3
   8   2 -14 6485.57 845.977   2
   8  -2 -14 6120.71 884.898   2
  -8   2  14 6261.92 559.344   1
   8  -2 -12 34291.8 1612.73   3
   8   2 -12 35549.0 1827.26   2
   8  -2 -12 35696.8 1926.71   2
   8   2 -10 43003.6 1380.08   1
   8   2 -10 46590.5 1932.62   2
   8  -2 -10 49644.1 2125.22   2
   8   2  -8 6992.55 564.724   1
   8   2  -8 6438.41 627.620   2
   8  -2  -8 8367.25 808.438   2
   8   2  -6 18985.9 996.797   1
   8   2  -6 17073.7 960.262   2
   8  -2  -4 49397.6 1822.21   1
   8   2  -4 48825.6 1774.71   1
   8  -2  -2 79278.9 2324.78   1
   8   2  -2 76850.2 2272.28   1
   8  -2   0 34138.6 1556.31   1
   8   2   0 34162.4 1575.01   1
  -8   2   0 30188.6 1063.25   3
   8  -2   2 46271.4 1894.98   1
  -8   2  -2 42853.9 1580.06   3
   8   2   2 47734.2 1970.45   1
  -8   2  -4 782.535 267.425   3
   8  -2   4 1087.27 315.871   1
   8   2   4 1365.35 355.523   1
   8  -2   6 5726.40 702.068   1
  -8   2  -6 6327.84 763.066   3
   8   2   6 5848.37 737.539   1
   8  -2   8 5127.73 672.066   1
  -8  -2  -8 6872.90 961.474   3
   8   2   8 6296.56 784.558   1
  -8   2  -8 5360.93 804.874   3
   8   2  10 6328.91 808.308   1
   8  -2  10 5767.70 731.438   1
  -8  -2 -10 5975.75 1036.94   3
  -8   2 -10 5701.66 941.933   3
  -8  -2 -12 4130.34 882.060   3
  -8   2 -12 3636.05 855.139   3
  -8  -2 -14 333.190 313.548   3
  -8   2 -14 475.381 395.930   3
   8  -3 -21 707.661 400.732   3
   8   3 -21 394.348 327.667   2
   8  -3 -21 52.1573 355.319   2
   8  -3 -19 612.581 391.894   3
   8  -3 -19 132.005 290.093   2
   8  -3 -17 411.380 299.183   3
   8   3 -17 477.569 335.190   2
   8  -3 -17 125.391 268.786   2
   8  -3 -15 566.844 252.443   3
   8   3 -15 597.917 275.481   2
   8  -3 -15 437.996 243.787   2
   8  -3 -13 3010.98 502.659   3
   8   3 -13 3005.93 551.873   2
   8  -3 -13 2988.19 578.292   2
   8   3 -11 18496.7 806.320   1
   8  -3 -11 20023.0 1123.28   3
   8   3 -11 22420.9 1325.83   2
   8  -3 -11 18926.4 1360.15   2
   8   3  -9 46443.2 1537.07   1
   8  -3  -9 46503.3 1526.71   3
   8   3  -9 46881.0 1809.90   2
   8  -3  -9 48400.6 2093.66   2
   8   3  -7 20167.2 1033.83   1
   8   3  -7 19386.7 1014.83   2
   8   3  -5 1196.37 300.131   1
   8   3  -3 9652.92 798.946   1
   8   3  -1 59920.0 2163.63   1
   8  -3  -1 57238.8 2108.07   1
   8  -3   1 37121.3 1703.59   1
   8   3   1 40092.0 1790.63   1
   8  -3   3 15353.4 1100.97   1
  -8   3  -3 13350.3 912.612   3
   8   3   3 16605.0 1179.59   1
   8  -3   5 2696.96 509.519   1
  -8   3  -5 3102.58 510.015   3
   8   3   5 3493.35 601.547   1
   8  -3   7 1409.71 371.976   1
  -8   3  -7 1255.00 398.686   3
   8   3   7 2375.16 516.409   1
   8  -3   9 241.514 171.598   1
  -8  -3  -9 1236.45 441.078   3
  -8   3  -9 838.954 391.499   3
   8   3   9 478.579 273.436   1
  -8  -3 -11 732.128 504.432   3
  -8   3 -11 963.748 436.479   3
   8   3  11 353.725 276.664   1
  -8  -3 -13 1625.24 653.960   3
  -8   3 -13 545.639 335.680   3
  -8  -3 -15 47.4963 324.001   3
  -8   3 -15-834.051 488.407   3
   8  -4 -22-771.865 456.842   3
   8  -4 -20-626.592 374.316   3
   8   4 -20-126.563 304.153   2
   8  -4 -20 339.471 486.620   2
   8  -4 -18-498.166 339.400   3
   8   4 -18 165.409 326.449   2
   8  -4 -18 31.7432 243.191   2
   8  -4 -16 673.982 303.327   3
   8   4 -16 490.157 327.503   2
   8  -4 -16 616.241 351.597   2
   8  -4 -14 1308.78 369.991   3
   8   4 -14 698.297 313.573   2
   8  -4 -14 334.165 324.942   2
  -8   4  14 852.420 276.276   1
   8  -4 -12 504.676 200.797   3
   8   4 -12 724.334 332.682   2
   8  -4 -12 339.999 284.777   2
   8   4 -10 328.628 139.841   1
   8   4 -10 220.275 164.198   2
   8  -4 -10 262.750 136.716   3
   8  -4 -10 462.659 279.254   2
   8   4  -8 3277.05 413.944   1
   8   4  -8 2511.42 378.155   2
   8  -4  -8 3096.73 310.059   3
   8  -4  -8 2865.36 511.689   2
   8   4  -6 4660.15 516.022   1
   8   4  -6 4516.11 435.951   2
   8   4  -4 20414.8 1175.35   1
   8   4  -2 20064.4 1224.37   1
   8   4   0 8056.29 807.912   1
   8   4   2 8370.58 859.299   1
   8   4   4 1266.64 357.711   1
  -8   4  -4 1178.88 278.271   3
  -8   4  -6 512.005 232.831   3
   8   4   6-4.01504 230.539   1
  -8   4  -8 1198.78 411.587   3
   8   4   8 1599.29 439.617   1
  -8   4 -10 628.294 406.246   3
  -8  -4 -10 299.283 383.337   3
   8   4  10 17.7087 203.059   1
  -8  -4 -12 592.457 351.642   3
   8   4  12 521.928 305.327   1
  -8  -4 -14 289.479 422.963   3
   8  -5 -21 1613.19 625.620   3
   8  -5 -21 1235.77 558.143   2
   8  -5 -19 402.249 329.176   3
   8   5 -19 920.419 445.748   2
   8  -5 -19 859.116 467.566   2
   8  -5 -17-29.3063 215.216   3
   8   5 -17-0.61847 231.297   2
   8  -5 -17-333.052 342.226   2
   8  -5 -15 7031.49 857.419   3
  -8   5  15 6388.74 738.403   1
   8   5 -15 6058.14 838.397   2
   8  -5 -15 6039.32 954.052   2
   8  -5 -13 4946.20 650.039   3
   8   5 -13 5783.26 723.092   2
   8  -5 -13 5641.69 857.721   2
  -8   5  13 5409.78 693.154   1
   8  -5 -11 10507.0 822.794   3
   8   5 -11 10718.3 891.071   2
   8  -5 -11 12206.9 1136.80   2
   8   5 -11 9962.76 666.221   1
   8  -5  -9 118722. 2733.81   3
   8   5  -9 116303. 2959.28   2
   8  -5  -9 117350. 3626.74   2
   8  -5  -7 84018.7 1829.29   3
   8   5  -7 77718.9 2432.07   1
   8   5  -7 80025.0 2135.37   2
   8   5  -5 965.442 291.987   1
   8   5  -5 996.750 192.474   2
   8   5  -3 19961.3 1242.41   1
   8   5  -1 89407.8 2942.61   1
   8   5   1 33487.1 1766.35   1
   8   5   3 14214.0 1173.39   1
   8   5   5 15518.2 1265.68   1
   8   5   7 4050.09 682.132   1
   8   5   9 5467.87 801.817   1
  -8  -5 -11 5043.51 1039.19   3
   8   5  11 4346.01 738.026   1
  -8  -5 -13 8.37581 401.274   3
   8  -6 -22 5623.11 1124.70   3
   8  -6 -20 2699.01 710.349   3
   8  -6 -20 1110.93 550.323   2
   8  -6 -18 5062.95 847.682   3
   8  -6 -18 5053.54 994.196   2
   8  -6 -16 19362.3 1524.91   3
   8   6 -16 17793.3 1497.22   2
   8  -6 -16 21051.9 1800.44   2
   8  -6 -14 569.303 281.616   3
  -8   6  14 837.103 323.404   1
   8   6 -14 654.053 263.959   2
   8  -6 -14-62.1547 285.916   2
   8  -6 -12 633.319 240.643   3
   8   6 -12 743.900 247.312   2
  -8   6  12 852.698 354.653   1
   8  -6 -12 666.705 358.833   2
   8  -6 -10 45337.9 1710.44   3
   8   6 -10 43755.0 1659.33   1
   8   6 -10 45480.4 1740.52   2
   8  -6 -10 45210.8 2257.58   2
   8  -6  -8 32912.5 1217.60   3
   8   6  -8 32974.0 1290.38   2
   8   6  -8 31220.7 1471.98   1
   8  -6  -8 32360.8 1777.19   2
   8   6  -6 172.809 152.754   1
   8   6  -6 178.558 93.7258   2
   8   6  -4 11336.5 514.713   2
   8   6  -4 12691.7 1014.02   1
   8   6  -2 257.253 220.957   1
   8   6   0 20202.3 1377.10   1
   8   6   2 1565.81 400.510   1
   8   6   4 5898.48 829.899   1
   8   6   6 9323.36 1034.25   1
   8   6   8 1826.22 526.224   1
   8   6  10 1881.05 507.598   1
  -8  -6 -12 7701.22 1298.74   3
   8   6  12 6866.26 961.529   1
  -8  -6 -14 943.402 586.517   3
   8  -7 -19 544.423 339.472   3
   8  -7 -19 1547.75 601.717   2
   8  -7 -17 220.448 322.663   2
   8  -7 -17 110.897 217.287   3
   8  -7 -15 32718.2 1953.75   3
  -8   7  15 31187.9 1899.41   1
   8  -7 -15 30815.7 2192.65   2
   8  -7 -13 41156.2 1999.03   3
   8   7 -13 39974.2 1918.40   2
   8  -7 -13 46187.7 2498.78   2
   8   7 -11 29711.2 1459.42   2
  -8   7  11 32606.5 1906.86   1
   8  -7 -11 32331.0 1565.06   3
   8  -7 -11 31601.4 1956.34   2
   8  -7  -9 105132. 2755.64   3
   8   7  -9 107578. 2680.34   2
   8   7  -9 98509.4 2946.41   1
   8  -7  -9 105431. 3575.00   2
   8   7  -7 166411. 4216.86   1
   8   7  -5 132729. 3766.64   1
   8   7  -3 83229.3 2940.83   1
   8   7  -1 67545.0 2697.67   1
   8   7   1 58226.9 2542.10   1
   8   7   3 142599. 4390.26   1
   8   7   5 100497. 3648.69   1
   8   7   7 3428.06 672.988   1
   8   7   9 5828.24 897.569   1
   8   7  11 5888.60 921.784   1
  -8  -7 -13 1535.53 694.312   3
   8  -8 -20 3676.21 937.042   2
   8  -8 -18 5781.94 1083.79   2
   8  -8 -16 12021.3 1411.63   2
   8  -8 -14 6257.76 825.067   3
  -8   8  14 6113.26 879.643   1
   8  -8 -14 5512.13 902.469   2
   8  -8 -12 2438.60 477.989   3
  -8   8  12 3192.90 668.868   1
   8  -8 -12 2801.91 597.605   2
   8  -8 -10 14971.4 1023.23   3
   8   8 -10 13922.4 1023.52   1
   8  -8 -10 16495.1 1391.04   2
   8   8  -8 7624.99 797.019   1
   8  -8  -8 8547.69 963.107   2
   8   8  -6 6744.70 793.202   1
   8   8  -4 14070.8 1180.19   1
   8   8  -2 12753.4 1170.04   1
   8   8   0 9687.52 1052.14   1
   8   8   2 361.791 244.289   1
   8   8   4 10174.1 1127.57   1
   8   8   6 23038.4 1736.20   1
   8   8   8 4300.35 800.283   1
   8   8  10 1016.71 442.854   1
  -8  -8 -12 8653.45 1499.31   3
   8   8  12 6606.22 1014.17   1
   8  -9 -19 1808.73 666.434   2
   8  -9 -17 330.360 405.494   2
  -8   9  15 4560.71 809.959   1
   8  -9 -15 3369.10 783.881   2
  -8   9  13 7571.30 1027.14   1
   8  -9 -13 7261.31 1021.60   2
   8  -9 -11 34350.9 2114.44   2
  -8   9  11 34300.2 2206.95   1
  -8   9   9 68400.7 3102.59   1
   8  -9  -9 68711.6 2948.84   2
   8   9  -9 59756.5 2439.22   1
   8  -9  -7 58200.3 2628.10   2
   8   9  -7 53974.9 2388.01   1
   8   9  -5 41536.8 2133.90   1
   8   9  -3 39048.4 2120.74   1
   8   9  -1 73688.8 3061.26   1
   8   9   1 53696.9 2640.18   1
   8   9   3 23908.4 1795.82   1
   8   9   5 19843.0 1664.69   1
   8   9   7 8438.09 1136.48   1
   8   9   9 6561.76 1009.09   1
   8   9  11 2571.97 661.404   1
   8 -10 -18 1161.45 578.852   2
   8 -10 -16 2185.37 658.752   2
   8 -10 -14 4467.00 871.417   2
  -8  10  14 4257.04 839.256   1
  -8  10  12 3147.84 706.958   1
   8 -10 -12 3076.94 731.356   2
  -8  10  10 70.3051 220.678   1
   8 -10 -10 582.178 329.512   2
  -8  10   8 238.785 216.353   1
   8  10  -8-134.592 214.973   1
   8 -10  -8 58.8121 215.186   2
   8  10  -6 86.7221 211.957   1
   8  10  -4 4123.91 726.503   1
   8  10  -2 358.294 260.944   1
   8  10   0 2043.00 548.526   1
   8  10   2 8231.43 1088.10   1
   8  10   4 1867.72 542.039   1
   8  10   6-178.799 246.602   1
   8  10   8 2340.66 672.514   1
   8  10  10 1488.75 536.231   1
   8  10  12-23.4732 269.085   1
   8 -11 -17 243.188 346.204   2
  -8  11  15 114.580 245.515   1
   8 -11 -15 545.471 340.523   2
   8 -11 -13 772.669 458.172   2
  -8  11  13-505.255 351.980   1
  -8  11  11 577.587 397.094   1
   8 -11 -11 86.8399 247.496   2
  -8  11   9 2601.28 711.825   1
   8  11  -9 2567.59 560.500   1
   8 -11  -9 2806.55 633.146   2
   8  11  -7 338.977 259.395   1
  -8  11   7 302.868 276.148   1
   8 -11  -7 209.486 195.556   2
   8  11  -5 16791.0 1461.14   1
   8  11  -3 915.915 431.102   1
   8  11  -1 1417.50 540.030   1
   8  11   1 1661.07 596.681   1
   8  11   3 303.875 376.205   1
   8  11   5 227.082 308.464   1
   8  11   7 799.159 449.783   1
   8  11   9 17.9040 250.444   1
  -8  12  14 785.289 404.735   1
  -8  12  12 44.3677 226.795   1
  -8  12  10 2270.19 688.895   1
   8 -12 -10 3244.21 675.321   2
  -8  12   8 1261.98 582.213   1
   8  12  -8 1776.57 493.204   1
   8 -12  -8 1779.80 490.240   2
  -8  12   6 2038.87 677.626   1
   8  12  -6 1709.63 487.479   1
   8 -12  -6 2117.94 532.319   2
  -8  12   4 9098.36 1276.27   1
   8  12  -4 8532.31 1120.49   1
   8  12  -2 3471.69 749.116   1
   8  12   0 2714.83 656.437   1
   8  12   2 1278.80 485.711   1
   8  12   4-78.4457 298.524   1
   8  12   6-138.718 319.872   1
   8  12   8-109.868 280.395   1
  -8  13  15 7884.40 1292.39   1
  -8  13  13 6853.08 1189.61   1
  -8  13  11 859.204 469.002   1
  -8  13   9 12434.6 1561.58   1
  -8  13   7 21970.5 2076.12   1
   8  13  -7 18042.3 1605.38   1
  -8  13   5 15054.0 1713.43   1
   8  13  -5 9519.66 1209.23   1
  -8  13   3 30805.3 2421.87   1
   8  13  -3 25840.6 2051.54   1
  -8  13   1 20424.1 1971.59   1
   8  13  -1 16563.5 1657.41   1
  -8  13  -1 1617.70 592.489   1
   8  13   1 870.756 525.454   1
   8  13   3 6632.03 1104.60   1
  -8  13  -5 15365.8 1697.56   1
   8  13   5 13604.5 1611.23   1
  -8  14  12 206.869 314.775   1
  -8  14  10 7571.26 1296.76   1
  -8  14   8 6784.07 1205.97   1
   8  14  -6 739.061 413.989   1
  -8  14   6 1311.11 564.144   1
  -8  14   4-220.498 324.191   1
   8  14  -4-88.2462 269.342   1
  -8  14   2 1191.28 546.029   1
   8  14  -2 703.054 333.826   1
   8  14   0 1126.41 527.565   1
  -8  14   0 1002.49 550.413   1
  -8  14  -2-1462.44 578.708   1
   8  14   2 706.107 423.127   1
  -8  14  -4-343.881 364.230   1
  -8  15   7 18614.4 2039.97   1
  -8  15   5 17325.4 1998.05   1
   8  15  -5 15486.4 1660.58   1
  -8  15   3 34628.0 2805.82   1
   8  15  -3 31587.5 2430.77   1
  -8  15   1 23237.7 2269.37   1
   8  15  -1 17703.4 1867.44   1
  -8  15  -1 9438.45 1442.57   1
  -8  15  -3 12890.9 1683.89   1
   8  16  -6 145.100 227.699   1
   9   0 -21 368.096 507.626   2
   9   0 -19 169.775 377.055   2
   9   0 -17 127.031 249.413   2
   9   0 -15 6.09189 242.596   2
   9   0 -13-156.888 270.683   2
   9   0 -11 206.726 250.336   2
   9   0  -9-13.6154 126.474   1
   9   0  -9 24.3216 160.021   2
   9   0  -7 41.8010 131.357   1
   9   0  -5 7.00248 146.766   1
   9   0  -3-58.2765 197.003   1
   9   0  -1-177.011 176.933   1
   9   0   1-206.932 216.140   1
  -9   0  -3 121.803 160.181   3
   9   0   3 68.3434 160.541   1
  -9   0  -5 1134.24 419.667   3
   9   0   5 432.319 313.320   1
  -9   0  -7 251.967 271.903   3
   9   0   7 402.536 274.303   1
  -9   0  -9 240.661 239.071   3
   9   0   9-81.8921 173.348   1
  -9   0 -11 550.344 396.656   3
  -9   0 -13 65.8977 282.479   3
  -9   0 -15-875.953 533.941   3
   9   1 -22-351.970 425.953   2
   9  -1 -22-655.081 453.093   2
   9   1 -20 976.208 513.489   2
   9  -1 -20 469.696 366.500   2
   9   1 -18-457.933 341.681   2
   9  -1 -18-288.791 328.864   2
   9   1 -16 1458.19 500.409   2
   9  -1 -16 1928.84 566.154   2
   9   1 -14 11986.7 1156.90   2
   9  -1 -14 12673.2 1215.84   2
   9   1 -12 34225.4 1814.12   2
   9  -1 -12 34231.4 1888.06   2
   9   1 -10 559.158 178.750   1
   9   1 -10 461.851 210.081   2
   9  -1 -10 810.677 318.347   2
   9   1  -8 710.677 209.726   1
   9   1  -8 326.927 217.302   2
   9  -1  -8 592.436 296.590   2
   9  -1  -6 79008.2 2406.64   1
   9   1  -6 77223.9 2353.46   1
   9  -1  -4 89966.1 2653.78   1
   9   1  -4 81742.3 2551.04   1
   9  -1  -2 21517.1 1244.17   1
   9   1  -2 16295.4 1094.89   1
  -9   1   0 28001.8 1164.32   3
   9   1   0 31653.9 1577.06   1
  -9   1  -2 37031.0 1578.79   3
   9   1   2 37783.7 1800.47   1
   9  -1   2 39270.1 1823.81   1
   9   1   4 4261.01 637.431   1
   9  -1   4 4215.96 614.735   1
  -9   1  -4 6068.16 708.159   3
   9  -1   6 11047.9 1015.46   1
  -9  -1  -6 7253.92 932.736   3
  -9   1  -6 9897.05 1006.90   3
   9   1   6 8693.48 936.327   1
   9  -1   8 18094.8 1336.55   1
  -9  -1  -8 16111.7 1498.65   3
   9   1   8 16681.1 1311.08   1
  -9   1  -8 18594.6 1531.79   3
  -9  -1 -10 94.0842 237.042   3
  -9   1 -10 438.653 396.307   3
   9  -1  10 636.260 314.528   1
   9   1  10 293.221 255.608   1
  -9  -1 -12-213.279 312.500   3
  -9   1 -12 251.585 254.767   3
  -9  -1 -14 1179.95 585.169   3
  -9   1 -14 1567.37 622.063   3
   9   2 -21 1680.90 629.028   2
   9  -2 -21 1681.55 624.960   2
   9   2 -19 14577.8 1550.44   2
   9  -2 -19 15631.0 1682.21   2
   9   2 -17 7912.05 1078.27   2
   9  -2 -17 8008.46 1115.65   2
   9   2 -15 4298.83 724.713   2
   9  -2 -15 3734.71 707.808   2
   9   2 -13 22713.8 1490.06   2
   9  -2 -13 21610.0 1570.23   2
   9   2 -11 19343.0 1277.08   2
   9  -2 -11 22111.5 1458.61   2
   9   2  -9 23954.9 1127.33   1
   9   2  -9 24314.3 1304.79   2
   9  -2  -9 22265.9 1413.40   2
   9   2  -7 123650. 3076.27   1
   9   2  -7 113914. 3008.21   2
   9  -2  -5 10424.1 842.161   1
   9   2  -5 7873.40 720.909   1
   9  -2  -3 39953.3 1741.91   1
   9   2  -3 40767.7 1745.94   1
  -9   2   1 378.215 120.880   3
   9  -2  -1 642.407 279.479   1
   9   2  -1 263.467 205.479   1
  -9   2  -1 176.819 108.883   3
   9  -2   1 495.883 291.037   1
   9   2   1 238.447 250.667   1
  -9   2  -3 170.793 118.870   3
   9  -2   3 37.5938 198.218   1
   9   2   3 133.097 179.465   1
   9   2   5 5201.87 718.863   1
  -9   2  -5 3581.08 588.058   3
   9  -2   5 4209.11 623.399   1
  -9  -2  -7 2109.59 540.320   3
  -9   2  -7 2200.12 513.426   3
   9  -2   7 1548.81 410.659   1
   9   2   7 1394.25 428.179   1
   9  -2   9 11087.9 1057.80   1
  -9  -2  -9 12511.1 1399.06   3
   9   2   9 11572.0 1126.85   1
  -9   2  -9 12585.2 1325.83   3
  -9  -2 -11 2572.31 744.718   3
   9   2  11 3126.89 599.247   1
  -9  -2 -13 554.636 481.020   3
  -9   2 -13-21.9822 410.264   3
  -9   2 -15 1251.98 620.180   3
   9   3 -22-1149.37 517.974   2
   9  -3 -22 349.803 413.250   2
   9   3 -20 261.269 342.987   2
   9  -3 -20-93.8681 295.355   2
   9  -3 -18 16204.4 1467.01   3
   9   3 -18 16073.2 1553.71   2
   9  -3 -18 16747.5 1677.76   2
   9  -3 -16 7470.90 897.190   3
   9   3 -16 7926.55 983.869   2
   9  -3 -16 8879.95 1145.33   2
   9  -3 -14 1119.04 320.773   3
   9   3 -14 1009.50 346.316   2
   9  -3 -14 1319.96 444.521   2
   9   3 -12 58315.3 1654.98   1
   9  -3 -12 62595.2 2160.41   3
   9   3 -12 66030.3 2485.51   2
   9  -3 -12 67608.4 2804.62   2
   9   3 -10 122790. 2963.76   1
   9   3 -10 123300. 3394.63   2
   9   3  -8 87382.1 2485.09   1
   9   3  -8 85891.0 2526.08   2
   9  -3  -8 92826.4 3047.39   2
   9   3  -6 122264. 3134.64   1
   9   3  -6 108161. 2801.81   2
   9   3  -4 136786. 3554.50   1
   9   3  -2 178143. 4370.53   1
   9  -3  -2 179314. 4383.03   1
   9  -3   0 271505. 5867.06   1
  -9   3   0 261398. 4675.10   3
   9   3   0 264483. 5822.76   1
   9  -3   2 190593. 4641.54   1
   9   3   2 180500. 4625.66   1
  -9   3  -2 175428. 3940.41   3
   9  -3   4 36034.9 1811.25   1
  -9   3  -4 32243.9 1600.38   3
   9   3   4 33864.1 1822.60   1
   9  -3   6 37965.6 1922.81   1
  -9   3  -6 40353.5 2023.92   3
   9   3   6 35741.4 1946.08   1
   9  -3   8 34517.3 1868.25   1
  -9  -3  -8 33813.7 2263.98   3
  -9   3  -8 34940.0 2096.25   3
   9   3   8 31385.6 1898.11   1
  -9  -3 -10 3210.46 800.211   3
  -9   3 -10 3682.25 774.349   3
   9   3  10 1915.67 563.813   1
  -9  -3 -12 6554.65 1174.49   3
  -9   3 -12 5822.79 1031.13   3
  -9  -3 -14 5149.26 1143.53   3
  -9   3 -14 4623.83 1014.36   3
   9  -4 -21 6383.41 1078.05   3
   9   4 -21 6745.90 1130.27   2
   9  -4 -21 5328.37 1097.76   2
   9  -4 -19 10905.6 1275.65   3
   9   4 -19 12462.5 1426.79   2
   9  -4 -19 12193.4 1527.52   2
   9  -4 -17 1334.49 417.009   3
   9   4 -17 1362.79 465.364   2
   9  -4 -17 1962.84 620.112   2
   9  -4 -15 18053.5 1347.61   3
   9   4 -15 19431.8 1479.61   2
   9  -4 -15 20114.6 1662.44   2
   9  -4 -13 133555. 3679.25   3
   9   4 -13 138588. 4023.62   2
   9  -4 -13 142962. 4470.34   2
   9   4 -11 48226.5 1625.80   1
   9  -4 -11 48012.7 1754.08   3
   9   4 -11 49979.9 2010.99   2
   9  -4 -11 52420.6 2415.50   2
   9  -4  -9 314.596 135.052   3
   9   4  -9 91.7344 125.841   1
   9   4  -9-33.4488 163.821   2
   9  -4  -9 19.2780 180.497   2
   9   4  -7 18901.0 1112.94   1
   9   4  -7 18475.5 981.165   2
   9   4  -5 16560.0 1081.12   1
   9   4  -3 639.248 245.715   1
   9   4  -1 18573.2 1260.20   1
   9   4   1 868.424 355.731   1
   9   4   3 17003.4 1286.33   1
  -9   4  -5 1207.99 351.956   3
   9   4   5 1879.80 490.872   1
  -9   4  -7 841.943 356.725   3
   9   4   7 676.434 321.297   1
  -9  -4  -9 6686.37 1091.40   3
  -9   4  -9 6366.96 927.935   3
   9   4   9 5523.37 830.093   1
  -9  -4 -11 4654.77 991.516   3
  -9   4 -11 4181.59 818.652   3
   9   4  11 3402.27 676.114   1
  -9  -4 -13 2787.51 842.429   3
   9  -5 -22 1327.00 560.374   3
   9  -5 -20-88.1036 240.646   3
   9   5 -20-127.683 256.535   2
   9  -5 -20-427.155 379.277   2
   9  -5 -18 3867.73 751.835   3
   9   5 -18 3857.11 781.391   2
   9  -5 -18 3897.18 847.385   2
   9  -5 -16 11766.0 1144.04   3
   9   5 -16 12973.0 1250.20   2
   9  -5 -16 12068.9 1362.64   2
   9  -5 -14 14817.5 1136.62   3
   9   5 -14 13154.4 1142.13   2
   9  -5 -14 14749.0 1460.81   2
  -9   5  14 14066.4 1137.01   1
   9  -5 -12 29225.7 1424.98   3
   9   5 -12 27813.9 1548.19   2
   9  -5 -12 29780.8 1884.72   2
   9  -5 -10 34551.3 1321.73   3
   9   5 -10 35486.2 1475.58   1
   9   5 -10 34474.7 1530.42   2
   9  -5 -10 34683.9 1931.85   2
   9   5  -8 38384.5 1627.85   1
   9   5  -8 40784.1 1505.84   2
   9  -5  -8 35531.5 1072.91   3
   9  -5  -8 36919.3 1945.50   2
   9   5  -6 128421. 3469.06   1
   9   5  -6 126736. 2856.27   2
   9   5  -4 153542. 4025.67   1
   9   5  -2 99330.5 3165.89   1
   9   5   0 134955. 3953.73   1
   9   5   2 88920.9 3153.72   1
   9   5   4 30574.5 1821.31   1
   9   5   6 34988.6 2009.98   1
   9   5   8 18071.9 1478.37   1
  -9  -5 -10 3118.69 806.391   3
   9   5  10 4195.66 758.317   1
  -9  -5 -12 2675.45 799.025   3
   9  -6 -21-157.078 319.900   2
   9  -6 -19 4959.56 875.894   3
   9  -6 -19 5291.99 1018.92   2
   9  -6 -17 10218.5 1132.89   3
   9   6 -17 9251.12 1118.64   2
   9  -6 -17 10198.3 1317.90   2
   9  -6 -15 9016.83 951.952   3
   9   6 -15 9051.42 1006.68   2
   9  -6 -15 7846.47 1102.60   2
  -9   6  15 8242.57 934.416   1
  -9   6  13 2283.76 525.989   1
   9  -6 -13 3207.40 510.782   3
   9   6 -13 2614.47 504.000   2
   9  -6 -13 2380.17 588.280   2
   9  -6 -11 35.1353 112.969   3
   9   6 -11 337.587 210.370   2
   9   6 -11 150.554 118.777   1
   9  -6 -11 188.955 202.163   2
   9  -6  -9 20924.3 934.256   3
   9   6  -9 21327.5 1219.73   1
   9   6  -9 20413.5 1067.13   2
   9  -6  -9 20345.8 1476.56   2
   9   6  -7 31624.5 1183.88   2
   9   6  -7 28622.0 1517.09   1
   9   6  -5 320.205 226.856   1
   9   6  -5 391.389 120.545   2
   9   6  -3 559.488 290.883   1
   9   6  -1 1225.74 378.510   1
   9   6   1 2045.57 472.888   1
   9   6   3 1486.18 468.380   1
   9   6   5 3202.58 667.598   1
   9   6   7 593.002 311.828   1
   9   6   9 1418.01 468.355   1
  -9  -6 -11 1044.03 579.531   3
   9   6  11 150.401 233.031   1
  -9  -6 -13 347.680 446.018   3
   9  -7 -20-31.3581 305.819   2
   9  -7 -18-272.256 361.048   2
   9  -7 -16 127.282 303.037   2
   9  -7 -14 2531.06 648.254   2
  -9   7  14 2559.41 592.060   1
   9  -7 -12 283.779 309.380   2
   9   7 -10 1276.55 323.162   1
   9  -7 -10 798.651 350.244   2
   9   7  -8 9536.54 881.126   1
   9  -7  -8 10331.7 1077.37   2
   9   7  -6 7659.17 829.317   1
   9   7  -4 148.240 239.296   1
   9   7  -2 410.432 289.242   1
   9   7   0 12008.8 1150.17   1
   9   7   2 9072.91 1023.86   1
   9   7   4 2599.18 593.822   1
   9   7   6 734.617 363.376   1
   9   7   8 98.2007 255.079   1
   9   7  10 932.091 414.495   1
  -9  -7 -12-166.456 430.327   3
   9   7  12-159.308 306.578   1
   9  -8 -19 774.005 473.804   2
   9  -8 -17 2129.54 647.775   2
  -9   8  15 1361.15 426.639   1
   9  -8 -15 399.627 281.418   2
  -9   8  13 2376.49 600.495   1
   9  -8 -13 1388.84 449.994   2
   9  -8 -11-30.1134 327.340   2
   9   8  -9 451.475 264.660   1
   9  -8  -9 277.058 207.245   2
   9   8  -7 6056.40 764.499   1
   9   8  -5 401.218 265.876   1
   9   8  -3 3048.77 595.136   1
   9   8  -1 3928.57 696.826   1
   9   8   1 1439.79 476.520   1
   9   8   3 264.701 249.573   1
   9   8   5 193.718 285.480   1
   9   8   7 159.976 297.163   1
   9   8   9 927.844 408.755   1
   9   8  11-505.658 356.303   1
   9  -9 -18 2994.34 796.189   2
   9  -9 -16 2264.04 655.418   2
  -9   9  14 900.306 431.054   1
   9  -9 -14 327.461 309.667   2
   9  -9 -12 14874.2 1450.95   2
  -9   9  12 14254.5 1441.07   1
   9   9 -10 6796.73 781.364   1
   9  -9 -10 6419.76 921.201   2
   9   9  -8 829.688 326.732   1
   9  -9  -8 1456.76 417.640   2
   9   9  -6 50564.3 2389.41   1
   9   9  -4 47246.6 2376.66   1
   9   9  -2 6095.06 861.068   1
   9   9   0 31498.1 2013.40   1
   9   9   2 32537.2 2102.81   1
   9   9   4 2081.08 558.497   1
   9   9   6 5481.61 908.619   1
   9   9   8 10774.8 1312.64   1
   9   9  10 802.067 450.259   1
   9   9  12-232.502 319.686   1
   9 -10 -19 5641.17 1124.91   2
   9 -10 -17 1585.71 646.057   2
   9 -10 -15 5286.53 971.619   2
  -9  10  15 4693.67 896.365   1
  -9  10  13 37980.8 2489.37   1
   9 -10 -13 37102.5 2419.73   2
   9 -10 -11 15514.2 1476.30   2
  -9  10  11 14359.3 1523.78   1
   9  10  -9 930.663 324.491   1
   9 -10  -9 704.041 343.970   2
   9  10  -7 2752.38 569.470   1
   9 -10  -7 5169.14 822.465   2
   9  10  -5 2254.24 528.731   1
   9  10  -3 1343.39 444.918   1
   9  10  -1 5797.69 890.541   1
   9  10   1-221.937 346.399   1
   9  10   3 9329.77 1188.51   1
   9  10   5-567.894 363.538   1
   9  10   7 18.8739 242.036   1
   9  10   9 1182.14 488.439   1
   9  10  11 167.957 270.538   1
   9 -11 -18 4751.38 1065.87   2
  -9  11  16 2000.24 590.107   1
   9 -11 -16 2669.51 788.126   2
   9 -11 -14 1880.84 592.746   2
  -9  11  14 1383.92 505.628   1
  -9  11  12 18096.4 1779.72   1
   9 -11 -12 17823.6 1673.15   2
   9 -11 -10 32252.0 2168.53   2
  -9  11  10 32510.2 2372.84   1
  -9  11   8 20375.6 1871.79   1
   9  11  -8 20099.5 1567.13   1
   9  11  -6 49203.3 2561.95   1
   9  11  -4 54726.4 2782.35   1
   9  11  -2 26551.3 1960.74   1
   9  11   0 48397.3 2733.48   1
   9  11   2 42527.9 2607.14   1
   9  11   4 23660.8 1974.82   1
   9  11   6 12936.3 1494.76   1
   9  11   8 6741.41 1110.21   1
  -9  12  15 11494.3 1475.64   1
  -9  12  13 9779.56 1371.24   1
   9 -12 -13 10382.1 1328.77   2
  -9  12  11 1552.49 579.257   1
   9 -12 -11 3065.87 692.355   2
  -9  12   9 6299.77 1092.59   1
   9 -12  -9 5503.52 896.461   2
  -9  12   7 21651.2 2005.60   1
   9 -12  -7 20977.3 1716.52   2
   9  12  -7 19797.7 1647.25   1
   9  12  -5 4913.05 864.633   1
   9  12  -3 736.780 416.522   1
   9  12  -1 865.367 424.841   1
   9  12   1 547.204 446.607   1
   9  12   3 61.1308 309.335   1
   9  12   5 1169.50 530.592   1
   9  12   7 1252.28 549.585   1
  -9  13  14 7339.95 1220.27   1
  -9  13  12 3354.63 842.862   1
  -9  13  10 1977.62 690.400   1
  -9  13   8 7274.90 1241.50   1
   9  13  -8 6675.42 990.756   1
   9  13  -6 19541.7 1744.77   1
  -9  13   6 23664.1 2189.07   1
  -9  13   4 31649.4 2529.58   1
   9  13  -4 25018.8 2021.71   1
   9  13  -2 23810.5 2005.44   1
   9  13   0 11947.3 1458.97   1
   9  13   2 3347.27 809.892   1
   9  13   4 7423.78 1175.35   1
  -9  14  11 2280.16 745.276   1
  -9  14   9 726.211 483.306   1
   9  14  -7-173.025 273.594   1
  -9  14   7 155.662 288.549   1
  -9  14   5 22.9110 365.918   1
   9  14  -5-194.607 290.916   1
   9  14  -3 1607.72 565.144   1
  -9  14   3 542.157 447.785   1
  -9  14   1-203.546 444.956   1
   9  14  -1 134.685 219.127   1
   9  14   1 161.931 272.084   1
  -9  14  -1-1340.77 596.838   1
  -9  14  -3-1642.78 629.085   1
   9  15  -6 1269.42 550.299   1
   9  15  -4 1805.93 637.759   1
   9  15  -2 917.890 471.527   1
  10   0 -22 5729.85 1146.77   2
  10   0 -20 1495.23 593.062   2
  10   0 -18 10625.4 1301.34   2
  10   0 -16 112821. 4076.70   2
  10   0 -14 38495.4 2119.12   2
  10   0 -12 531.994 274.982   2
  10   0 -10 64130.7 2467.79   2
  10   0  -8 98180.6 2777.79   1
  10   0  -8 93374.1 2983.83   2
  10   0  -6 85742.0 2650.51   1
  10   0  -4 72700.4 2478.21   1
  10   0  -2 2909.53 503.555   1
  10   0   0 839.863 306.894   1
  10   0   2 5029.96 693.723   1
 -10   0  -4 1354.19 381.892   3
  10   0   4 2333.49 491.805   1
  10   0   6 6958.44 862.870   1
 -10   0  -6 6265.95 864.154   3
 -10   0  -8 4039.96 756.259   3
  10   0   8 3448.12 635.550   1
  10   0  10 260.704 229.272   1
 -10   0 -10-253.603 315.916   3
 -10   0 -12 2526.37 751.135   3
 -10   0 -14 1236.04 582.173   3
  10   1 -21 2135.20 676.866   2
  10  -1 -21 1428.68 573.300   2
  10   1 -19-23.9090 311.256   2
  10  -1 -19-530.284 521.497   2
  10   1 -17 335.651 357.311   2
  10  -1 -17 321.249 308.543   2
  10   1 -15 12983.5 1258.73   2
  10  -1 -15 13484.0 1323.03   2
  10   1 -13 14395.9 1218.58   2
  10  -1 -13 13728.6 1243.70   2
  10   1 -11 22414.3 1405.69   2
  10  -1 -11 21191.5 1434.75   2
  10   1 -11 20149.9 1046.13   1
  10   1  -9 92158.4 2606.78   1
  10   1  -9 89572.9 2848.53   2
  10  -1  -9 92249.1 3030.94   2
  10  -1  -7 186670. 4355.25   1
  10   1  -7 185770. 4294.20   1
  10  -1  -5 121275. 3366.28   1
  10   1  -5 129042. 3417.41   1
  10  -1  -3 193606. 4623.68   1
  10   1  -3 195808. 4648.03   1
  10  -1  -1 118671. 3480.06   1
  10   1  -1 119158. 3482.23   1
  10  -1   1 8226.15 860.533   1
 -10   1  -1 7197.57 653.483   3
  10   1   1 9496.78 917.854   1
  10  -1   3 103468. 3372.74   1
 -10   1  -3 106336. 3185.17   3
  10   1   3 108497. 3456.67   1
  10  -1   5 114385. 3651.81   1
 -10  -1  -5 116442. 3846.50   3
 -10   1  -5 115847. 3672.03   3
  10   1   5 113024. 3683.55   1
  10  -1   7 12949.3 1176.89   1
 -10  -1  -7 14186.7 1372.16   3
  10   1   7 14319.9 1246.03   1
 -10   1  -7 15109.9 1355.84   3
  10  -1   9 11789.0 1140.23   1
  10   1   9 12355.0 1190.24   1
 -10  -1  -9 13691.6 1483.07   3
 -10   1  -9 12778.6 1371.67   3
 -10  -1 -11 6700.15 1144.51   3
 -10   1 -11 6561.57 1083.51   3
 -10  -1 -13 1700.00 662.564   3
 -10   1 -13 2178.52 660.895   3
  10   2 -22 3847.63 953.061   2
  10  -2 -22 3177.95 876.745   2
  10   2 -20 5842.63 1011.35   2
  10  -2 -20 5570.67 1065.06   2
  10   2 -18 4301.00 836.261   2
  10  -2 -18 4585.70 900.943   2
  10   2 -16 9847.36 1107.16   2
  10  -2 -16 9073.16 1129.19   2
  10   2 -14 9804.25 1029.67   2
  10  -2 -14 9048.15 1078.74   2
  10   2 -12 18423.4 1297.92   2
  10  -2 -12 17312.7 1364.70   2
  10   2 -12 16880.1 912.353   1
  10   2 -10 46606.2 1712.48   1
  10   2 -10 45797.7 1973.04   2
  10  -2 -10 47774.0 2201.94   2
  10   2  -8 7419.46 691.366   1
  10   2  -8 6779.79 703.495   2
  10   2  -6 10386.8 854.562   1
  10  -2  -6 10439.0 876.252   1
  10  -2  -4 59415.1 2238.60   1
  10   2  -4 56967.1 2184.94   1
  10  -2  -2 18307.3 1213.15   1
 -10   2   2 16344.2 643.580   3
  10   2  -2 18474.9 1240.51   1
 -10   2   0 2975.73 359.996   3
  10  -2   0 3185.37 550.610   1
  10   2   0 3467.66 570.108   1
 -10   2  -2 744.295 253.837   3
  10  -2   2 635.994 261.288   1
  10   2   2 1048.92 312.145   1
 -10   2  -4 5479.13 679.849   3
  10   2   4 5475.44 756.849   1
  10  -2   4 5209.92 718.592   1
 -10  -2  -6 698.684 365.275   3
 -10   2  -6 320.284 265.614   3
  10  -2   6 427.245 282.525   1
  10   2   6 549.132 351.481   1
 -10  -2  -8 814.351 439.673   3
  10  -2   8 390.652 241.238   1
 -10   2  -8 499.805 308.512   3
  10   2   8 363.830 278.419   1
  10  -2  10 202.149 209.020   1
 -10  -2 -10 257.700 382.377   3
 -10   2 -10-255.557 294.112   3
  10   2  10-226.699 230.338   1
 -10  -2 -12 2938.02 838.861   3
 -10   2 -12 2849.27 752.858   3
 -10  -2 -14 685.650 488.967   3
 -10   2 -14 511.749 420.427   3
  10   3 -21-253.325 339.471   2
  10  -3 -21-252.244 358.914   2
  10   3 -19 3.56416 278.476   2
  10  -3 -19 315.817 357.144   2
  10   3 -17 633.904 309.691   2
  10  -3 -17 1377.22 543.943   2
  10   3 -15 133.278 200.513   2
  10  -3 -15 101.816 302.329   2
  10   3 -13 760.049 305.269   2
  10  -3 -13 1069.14 377.650   2
  10   3 -11 2935.78 400.588   1
  10   3 -11 3088.33 524.273   2
  10  -3 -11 2941.63 579.511   2
  10   3  -9 32797.9 1465.91   1
  10   3  -9 30573.7 1483.48   2
  10  -3  -9 33705.6 1813.83   2
  10   3  -7 32230.6 1517.64   1
  10   3  -7 29282.9 1356.38   2
  10   3  -5 2710.85 460.029   1
  10  -3  -3 584.604 295.028   1
  10   3  -3 110.627 184.194   1
  10  -3  -1 16612.9 1206.38   1
 -10   3   1 13281.5 607.224   3
  10   3  -1 16635.1 1209.22   1
  10  -3   1 26815.7 1580.01   1
 -10   3  -1 23382.0 1111.53   3
  10   3   1 29265.9 1675.13   1
  10  -3   3 11167.0 1043.84   1
 -10   3  -3 11107.5 884.579   3
  10   3   3 11665.2 1095.68   1
  10  -3   5 2042.53 501.458   1
 -10   3  -5 1797.88 446.788   3
  10  -3   7 1127.38 389.344   1
 -10   3  -7 858.969 375.476   3
  10   3   7 1119.87 390.144   1
  10  -3   9 2227.40 506.896   1
 -10  -3  -9 2688.23 691.321   3
 -10   3  -9 2325.79 589.980   3
  10   3   9 2548.54 591.461   1
 -10  -3 -11 1025.35 523.674   3
 -10   3 -11 956.342 566.486   3
  10   3  11 1507.46 451.798   1
 -10  -3 -13 419.743 498.890   3
 -10   3 -13 26.1528 270.175   3
  10   4 -22 547.588 444.522   2
  10   4 -20 95.4692 315.596   2
  10  -4 -20 214.036 322.520   2
  10  -4 -18-86.0264 288.426   3
  10   4 -18-151.239 301.130   2
  10  -4 -18-182.644 391.829   2
  10  -4 -16-356.976 234.243   3
  10   4 -16-239.179 249.742   2
  10  -4 -16 94.7936 242.872   2
  10  -4 -14 69.9917 146.294   3
  10   4 -14 346.000 234.281   2
  10  -4 -14 441.138 309.612   2
  10  -4 -12 4283.93 502.356   3
  10   4 -12 2806.93 501.581   2
  10  -4 -12 3523.07 683.607   2
  10   4 -10 10172.0 790.866   1
  10   4 -10 10524.1 866.486   2
  10  -4 -10 11185.3 1092.35   2
  10   4  -8 69.6075 135.597   1
  10   4  -8 196.793 147.570   2
  10   4  -6 2923.17 404.582   2
  10   4  -6 2747.54 451.735   1
  10   4  -4 644.715 278.453   1
  10   4  -2 905.263 322.543   1
  10   4   0 240.870 181.844   1
  10   4   2 1559.97 390.114   1
 -10   4  -4 1960.72 393.607   3
  10   4   4 1674.13 464.662   1
 -10   4  -6 810.262 317.056   3
  10   4   6 816.905 373.749   1
 -10   4  -8 436.727 272.599   3
  10   4   8 126.788 231.154   1
 -10  -4 -10 492.194 405.452   3
 -10   4 -10 643.138 451.510   3
  10   4  10 135.352 239.160   1
 -10  -4 -12 325.708 398.661   3
  10   5 -21-51.1644 244.830   2
  10  -5 -21 392.951 419.820   2
  10   5 -19 286.103 308.848   2
  10  -5 -19 350.544 465.079   2
  10  -5 -17 243.554 263.078   3
  10   5 -17 503.338 291.992   2
  10  -5 -17 211.008 271.892   2
 -10   5  15 2034.94 457.601   1
  10  -5 -15 2942.17 537.304   3
  10   5 -15 1793.65 444.703   2
  10  -5 -15 1783.88 553.067   2
  10  -5 -13 136.650 151.110   3
  10  -5 -13 87.7027 273.758   2
  10  -5 -11 1668.33 285.932   3
  10   5 -11 1431.89 302.961   1
  10   5 -11 1957.02 385.249   2
  10  -5 -11 2041.30 513.003   2
  10   5  -9 75139.1 2494.80   1
  10   5  -9 79111.5 2384.53   2
  10  -5  -9 81906.6 3118.21   2
  10   5  -7 52639.2 2116.55   1
  10   5  -7 55349.7 1787.33   2
  10   5  -5-81.3064 228.392   1
  10   5  -5 212.579 122.251   2
  10   5  -3 12611.4 1083.77   1
  10   5  -1 37965.5 1964.16   1
  10   5   1 15032.6 1263.97   1
  10   5   3 19101.1 1465.30   1
  10   5   5 11000.5 1145.98   1
  10   5   7 3386.61 685.463   1
  10   5   9 2697.49 603.218   1
 -10  -5 -11 1397.84 633.397   3
  10   5  11 1958.52 566.306   1
  10  -6 -20 2894.62 832.560   2
  10   6 -18 3437.71 708.102   2
  10  -6 -18 3994.10 889.258   2
  10   6 -16 21105.6 1588.31   2
  10  -6 -16 19355.8 1779.24   2
 -10   6  14 10425.9 1083.06   1
  10   6 -14 8456.43 893.760   2
  10  -6 -14 10838.2 1241.56   2
  10   6 -12 8256.60 805.018   2
  10  -6 -12 9952.44 1122.46   2
  10   6 -10 26608.5 1415.49   1
  10   6 -10 29132.1 1370.87   2
  10   6  -8 19771.4 1283.66   1
  10   6  -8 22391.7 1063.49   2
  10   6  -6 20330.9 1340.05   1
  10   6  -6 21011.0 928.011   2
  10   6  -4 51520.8 2285.58   1
  10   6  -4 50526.5 1501.10   2
  10   6  -2 4673.92 701.777   1
  10   6   0 3351.35 624.903   1
  10   6   2 4427.70 722.833   1
  10   6   4 808.943 383.726   1
  10   6   6 3961.39 745.811   1
  10   6   8 13.2364 240.395   1
 -10  -6 -10 77.6436 305.991   3
  10   6  10 238.785 279.594   1
 -10  -6 -12 1251.12 723.115   3
  10  -7 -19-213.433 319.954   2
  10  -7 -17 1878.91 632.027   2
  10  -7 -15 15607.8 1563.41   2
 -10   7  15 14661.3 1352.80   1
  10  -7 -13 40104.1 2391.93   2
  10   7 -11 18570.6 1168.77   1
  10  -7 -11 21447.1 1673.54   2
  10   7  -9 38369.0 1844.22   1
  10  -7  -9 41557.2 2268.98   2
  10   7  -7 21398.5 1401.51   1
  10   7  -5 35719.4 1897.97   1
  10   7  -3 187969. 5057.01   1
  10   7  -1 114916. 3849.90   1
  10   7   1 19792.3 1549.67   1
  10   7   3 27271.9 1867.84   1
  10   7   5 45515.0 2498.58   1
  10   7   7 11100.3 1257.46   1
  10   7   9 7068.55 1015.72   1
 -10  -7 -11 11585.8 1717.06   3
  10   7  11 10376.3 1288.56   1
  10  -8 -20 2386.42 789.653   2
  10  -8 -18 8048.90 1268.99   2
  10  -8 -16 21275.1 1910.63   2
  10  -8 -14 11985.7 1369.27   2
 -10   8  14 9728.97 1174.67   1
  10  -8 -12 14380.1 1426.53   2
  10   8 -10 44756.9 2050.97   1
  10  -8 -10 54014.0 2681.90   2
  10   8  -8 34320.0 1838.43   1
  10  -8  -8 34757.1 2100.53   2
  10   8  -6 1794.15 453.986   1
  10   8  -4 17021.2 1385.87   1
  10   8  -2 21817.4 1612.49   1
  10   8   0 212.739 220.957   1
  10   8   2 1647.22 498.748   1
  10   8   4-8.85566 248.280   1
  10   8   6 2564.95 655.839   1
  10   8   8 1057.75 469.397   1
  10   8  10 1074.55 470.619   1
  10  -9 -19 6.82590 285.433   2
  10  -9 -17 4970.22 980.856   2
 -10   9  15 3759.61 768.596   1
  10  -9 -15 2681.33 696.660   2
 -10   9  13-90.5101 288.165   1
  10  -9 -13 618.527 392.954   2
  10  -9 -11 4304.21 794.377   2
  10   9  -9 55283.0 2447.83   1
  10  -9  -9 65293.1 2990.89   2
  10   9  -7 33890.5 1939.10   1
  10   9  -5 14720.6 1310.70   1
  10   9  -3 34054.1 2062.57   1
  10   9  -1 41718.9 2365.52   1
  10   9   1 49781.2 2656.36   1
  10   9   3 16306.3 1548.84   1
  10   9   5 7006.50 1041.47   1
  10   9   7 6578.40 1049.18   1
  10   9   9 4341.73 881.370   1
  10   9  11 4986.43 930.201   1
  10 -10 -18 2540.37 763.895   2
  10 -10 -16 347.462 328.627   2
 -10  10  16 723.800 372.885   1
 -10  10  14 2738.62 721.422   1
  10 -10 -14 3901.69 841.408   2
  10 -10 -12 14331.9 1485.24   2
 -10  10  12 14443.7 1566.59   1
  10 -10 -10 5342.27 903.737   2
  10  10  -8 2369.07 525.429   1
  10 -10  -8 2235.68 613.850   2
  10  10  -6 17.1899 242.291   1
  10  10  -4-122.015 270.109   1
  10  10  -2 3414.81 704.051   1
  10  10   0 1592.77 528.218   1
  10  10   2 589.020 370.650   1
  10  10   4 781.069 421.784   1
  10  10   6 217.568 352.930   1
  10  10   8 40.4473 266.693   1
  10 -11 -17-263.611 376.372   2
 -10  11  15-322.975 336.739   1
  10 -11 -15-3.36650 288.610   2
 -10  11  13 299.234 357.555   1
  10 -11 -13 1154.26 482.871   2
 -10  11  11 880.332 473.728   1
  10 -11 -11 722.503 380.091   2
  10  11  -9 166.918 195.182   1
 -10  11   9 678.802 393.939   1
  10 -11  -9 685.992 305.973   2
  10  11  -7 504.910 367.864   1
  10 -11  -7 1079.94 437.896   2
  10  11  -5 4727.29 812.318   1
  10  11  -3 3273.43 705.249   1
  10  11  -1 157.921 316.335   1
  10  11   1 791.868 513.585   1
  10  11   3 359.341 394.021   1
  10  11   5-168.290 303.985   1
  10  11   7 628.334 525.945   1
 -10  12  16 1145.30 518.972   1
 -10  12  14 367.170 342.769   1
  10 -12 -14-857.569 471.296   2
 -10  12  12 1969.29 657.756   1
  10 -12 -12 1931.01 586.068   2
 -10  12  10 9422.53 1367.71   1
  10 -12 -10 10539.2 1293.23   2
  10  12  -8 402.802 288.117   1
  10 -12  -8-89.3259 261.409   2
  10  12  -6 2491.54 645.424   1
  10  12  -4 3910.34 798.400   1
  10  12  -2 5681.67 959.117   1
  10  12   0-11.4041 243.174   1
  10  12   2-118.383 290.305   1
  10  12   4 3.35780 294.003   1
  10  12   6 57.3676 271.126   1
 -10  13  15 1951.45 663.618   1
 -10  13  13 2910.20 828.775   1
 -10  13  11 731.743 464.024   1
 -10  13   9 8646.61 1362.52   1
 -10  13   7 15070.1 1783.66   1
  10  13  -7 11654.8 1348.17   1
  10  13  -5 7168.52 1082.18   1
 -10  13   5 9329.80 1402.01   1
  10  13  -3 11772.8 1421.14   1
  10  13  -1 10937.2 1394.71   1
  10  13   1 2992.80 757.364   1
  10  13   3 4467.44 956.079   1
 -10  14  10 5192.89 1130.82   1
 -10  14   8 7786.52 1355.00   1
  10  14  -6 8563.86 1191.15   1
 -10  14   6 9929.66 1500.12   1
 -10  14   4 5868.60 1184.72   1
  10  14  -4 4541.30 922.261   1
  10  14  -2-462.818 373.914   1
 -10  14   2 124.524 417.589   1
  10  14   0-766.895 452.883   1
 -10  14   0-1806.17 670.880   1
 -10  14  -2 1313.61 570.792   1
  10  15  -5 9173.51 1321.80   1
  11   0 -21-567.535 427.609   2
  11   0 -19-70.4242 291.832   2
  11   0 -17 115.029 393.392   2
  11   0 -15 55.1206 278.636   2
  11   0 -13-203.707 243.044   2
  11   0 -11-7.89545 209.413   2
  11   0  -9 14.2272 133.078   1
  11   0  -9 278.195 277.483   2
  11   0  -7 140.391 170.061   1
  11   0  -5 478.517 237.525   1
  11   0  -3 194.202 247.351   1
  11   0  -1 129.764 186.897   1
  11   0   1 155.833 211.519   1
 -11   0  -3 32.0255 172.583   3
  11   0   3-139.935 235.256   1
 -11   0  -5 380.689 303.059   3
  11   0   5 173.599 249.471   1
 -11   0  -7 608.435 350.371   3
  11   0   7-239.142 244.071   1
 -11   0  -9-41.4019 333.928   3
  11   0   9 2.26200 164.259   1
 -11   0 -11-284.983 341.063   3
 -11   0 -13-449.344 404.120   3
  11   1 -22 92.1180 354.892   2
  11  -1 -22 90.7856 378.518   2
  11   1 -20 96.9638 360.994   2
  11  -1 -20-86.0979 336.706   2
  11   1 -18 259.188 307.240   2
  11  -1 -18 229.827 320.101   2
  11   1 -16 431.269 352.008   2
  11  -1 -16-594.285 371.948   2
  11   1 -14 425.484 302.347   2
  11  -1 -14 471.563 279.101   2
  11   1 -12 16757.9 1277.76   2
  11  -1 -12 17410.6 1393.82   2
  11   1 -10 12206.2 892.926   1
  11   1 -10 12102.1 1037.40   2
  11  -1  -8 906.173 291.185   1
  11   1  -8 1092.65 303.503   1
  11   1  -8 1189.50 357.499   2
  11  -1  -6 5349.49 650.187   1
  11   1  -6 4529.69 593.829   1
  11  -1  -4 44428.3 1964.59   1
  11   1  -4 41200.3 1910.03   1
  11  -1  -2 34495.5 1780.94   1
  11   1  -2 31497.2 1703.62   1
  11  -1   0 8008.06 866.323   1
 -11   1   0 7784.73 652.886   3
  11   1   0 7207.99 834.197   1
 -11   1  -2 3007.84 492.600   3
  11  -1   2 3446.42 603.366   1
  11   1   2 1726.64 484.169   1
  11  -1   4 15490.8 1272.53   1
 -11  -1  -4 11541.2 1121.53   3
 -11   1  -4 17288.8 1286.06   3
  11   1   4 12471.3 1177.48   1
  11  -1   6 12183.9 1173.94   1
 -11  -1  -6 13242.5 1310.50   3
  11   1   6 12586.6 1208.19   1
 -11   1  -6 13902.9 1275.71   3
 -11  -1  -8 3703.63 795.069   3
 -11   1  -8 3805.99 755.387   3
  11  -1   8 3943.41 706.015   1
  11   1   8 2728.39 595.339   1
 -11  -1 -10 673.836 307.497   3
 -11   1 -10 210.099 302.002   3
  11  -1  10 408.691 284.574   1
  11   1  10 406.447 295.466   1
 -11  -1 -12 89.8156 321.224   3
 -11   1 -12-725.710 462.693   3
  11   2 -21 1073.27 520.529   2
  11  -2 -21 969.211 491.689   2
  11   2 -19 9633.10 1248.30   2
  11  -2 -19 13219.1 1523.39   2
  11  -2 -17 8176.43 1132.26   2
  11   2 -17 5593.65 909.221   2
  11   2 -15 17927.9 1458.13   2
  11  -2 -15 21170.5 1681.90   2
  11   2 -13 49720.3 2321.32   2
  11  -2 -13 45706.4 2388.08   2
  11   2 -11 22210.4 1190.91   1
  11   2 -11 22577.9 1436.25   2
  11  -2 -11 26053.3 1662.13   2
  11   2  -9 24641.0 1329.93   1
  11   2  -9 25279.3 1418.09   2
  11  -2  -9 28552.8 1680.24   2
  11   2  -7 57434.9 2192.70   1
  11  -2  -7 58334.4 2249.73   1
  11  -2  -5 26921.1 1515.71   1
  11   2  -5 22697.7 1401.87   1
 -11   2   3 1226.37 148.246   3
  11  -2  -3 2008.73 456.366   1
  11   2  -3 2059.93 447.646   1
  11  -2  -1 29033.0 1644.94   1
 -11   2   1 26322.6 1043.09   3
  11   2  -1 25893.5 1585.64   1
  11  -2   1 17199.6 1295.95   1
 -11   2  -1 15178.4 949.731   3
  11   2   1 16058.6 1267.57   1
 -11   2  -3 510.894 251.442   3
  11  -2   3 1603.40 443.641   1
  11   2   3 1182.43 416.897   1
 -11   2  -5 991.397 347.519   3
  11  -2   5 1438.18 439.270   1
  11   2   5 1323.00 429.759   1
 -11  -2  -7 144.921 328.716   3
  11  -2   7 53.6636 206.762   1
 -11   2  -7-171.996 275.976   3
  11   2   7-289.608 311.076   1
 -11  -2  -9 1131.17 515.270   3
  11  -2   9 1305.70 412.042   1
 -11   2  -9 946.278 422.114   3
  11   2   9 707.392 385.728   1
 -11  -2 -11 345.505 300.105   3
 -11   2 -11 196.395 314.044   3
 -11  -2 -13 372.039 501.597   3
 -11   2 -13-461.709 389.592   3
  11   3 -22 666.742 481.855   2
  11  -3 -22 781.541 541.055   2
  11   3 -20 552.394 428.228   2
  11  -3 -20 926.081 526.436   2
  11  -3 -18 8116.36 1192.95   2
  11   3 -18 7278.55 1025.18   2
  11   3 -16 4143.57 721.913   2
  11  -3 -16 3761.46 751.623   2
  11   3 -14 596.225 295.445   2
  11  -3 -14 71.7702 235.807   2
  11   3 -12 15485.5 940.965   1
  11   3 -12 13169.2 1091.02   2
  11  -3 -12 16494.7 1393.77   2
  11   3 -10 17031.9 1078.75   1
  11   3 -10 15361.8 1122.08   2
  11  -3 -10 16759.8 1356.50   2
  11   3  -8 19282.2 1211.98   1
  11   3  -8 19386.6 1162.01   2
  11   3  -6 185150. 4564.24   1
  11   3  -4 103599. 3298.26   1
  11  -3  -4 105763. 3339.45   1
  11  -3  -2 12219.8 1074.46   1
  11   3  -2 11006.7 1021.47   1
 -11   3   0 82208.6 2168.61   3
  11   3   0 83239.2 3075.02   1
  11  -3   2 128191. 3950.04   1
 -11   3  -2 123029. 3252.22   3
  11   3   2 122845. 3961.17   1
  11  -3   4 42687.1 2178.49   1
 -11   3  -4 42188.0 1971.89   3
  11  -3   6 17653.8 1425.23   1
 -11   3  -6 18113.2 1424.12   3
  11   3   6 15798.5 1397.87   1
 -11  -3  -8 18675.7 1781.31   3
  11   3   8 17423.1 1505.81   1
 -11   3  -8 19478.8 1656.63   3
  11  -3   8 15502.4 1359.19   1
 -11  -3 -10 6624.70 1145.26   3
 -11   3 -10 7338.54 1128.53   3
  11   3  10 4872.87 834.572   1
 -11  -3 -12 2954.74 912.431   3
  11   4 -21 3378.75 820.726   2
  11  -4 -21 2433.12 788.310   2
  11   4 -19 15443.6 1537.07   2
  11  -4 -19 16672.1 1750.52   2
  11   4 -17 11587.9 1231.79   2
  11  -4 -17 8856.86 1207.19   2
  11   4 -15 19488.5 1473.52   2
  11  -4 -15 18456.4 1626.50   2
  11   4 -13 74985.8 2808.95   2
  11  -4 -13 74603.3 3235.33   2
  11   4 -11 62368.2 2174.64   1
  11   4 -11 65869.8 2414.35   2
  11  -4 -11 66445.5 2873.53   2
  11   4  -9 53619.7 2105.71   1
  11   4  -9 57239.5 2083.93   2
  11   4  -7 68088.9 2484.61   1
  11   4  -7 65082.2 2147.94   2
  11   4  -5 15054.6 1149.06   1
  11   4  -3 8416.57 906.996   1
  11   4  -1 42779.0 2126.05   1
  11   4   1 14038.7 1238.31   1
  11   4   3-19.3215 229.613   1
  11  -4   3-716.428 330.331   1
  11   4   5 2845.55 624.555   1
  11   4   7-92.6722 273.906   1
 -11  -4  -9 1585.92 609.424   3
  11   4   9 2304.02 593.165   1
 -11  -4 -11-50.3978 300.850   3
  11   4  11-339.019 314.916   1
  11   5 -22 326.201 403.408   2
  11   5 -20 385.088 317.505   2
  11  -5 -20 181.061 302.517   2
  11   5 -18 1075.40 424.252   2
  11  -5 -18 553.380 410.681   2
  11   5 -16-453.993 295.952   2
  11  -5 -16 384.132 353.438   2
  11   5 -14 4468.68 682.370   2
  11  -5 -14 5295.19 882.266   2
  11   5 -12 40130.5 1868.28   2
  11  -5 -12 44901.3 2424.78   2
  11   5 -10 12356.1 967.397   1
  11   5 -10 12528.0 928.197   2
  11  -5 -10 11741.0 1181.99   2
  11   5  -8 578.659 272.167   1
  11   5  -8 460.981 187.245   2
  11   5  -6 34050.9 1762.38   1
  11   5  -6 31616.5 1331.97   2
  11   5  -4 103147. 3368.62   1
  11   5  -2 77291.8 2958.45   1
  11   5   0 73331.0 2943.10   1
  11   5   2 45253.8 2327.64   1
  11   5   4 9391.25 1075.83   1
  11   5   6 13953.6 1356.54   1
  11   5   8 18113.9 1599.46   1
 -11  -5 -10 5541.78 1130.63   3
  11   5  10 3785.64 784.640   1
 -11  -5 -12 1495.63 683.781   3
  11  -6 -19 2464.19 734.408   2
  11  -6 -17 5206.58 991.879   2
 -11   6  15 10766.8 1124.79   1
  11   6 -15 10528.8 1034.59   2
  11  -6 -15 13618.9 1446.07   2
  11   6 -13 17176.4 1229.29   2
  11  -6 -13 17795.2 1572.29   2
  11   6 -11 8144.59 788.647   1
  11   6 -11 7711.51 739.756   2
  11  -6 -11 7780.35 1014.42   2
  11   6  -9 3780.43 459.480   2
  11   6  -9 3870.46 583.889   1
  11  -6  -9 3533.73 695.023   2
  11   6  -7 19545.6 1344.56   1
  11   6  -7 21184.3 1020.52   2
  11   6  -5 27772.5 1674.75   1
  11   6  -3 14659.4 1250.18   1
  11   6  -1 321.477 244.160   1
  11   6   1 482.732 336.696   1
  11   6   3 974.815 367.811   1
  11   6   5 1786.89 512.830   1
  11   6   7-381.518 405.287   1
  11   6   9-3.50259 206.939   1
 -11  -6 -11 1054.59 604.982   3
  11   6  11 167.910 323.315   1
  11  -7 -20-156.469 407.413   2
  11  -7 -18-924.799 491.884   2
  11  -7 -16 333.355 399.222   2
  11  -7 -14 124.583 223.790   2
  11  -7 -12-193.153 286.094   2
  11  -7 -10 3485.14 693.049   2
  11   7 -10 3196.26 533.827   1
  11   7  -8 5972.70 760.065   1
  11   7  -6 20.8126 181.260   1
  11   7  -4 1465.85 470.321   1
  11   7  -2 12215.6 1195.58   1
  11   7   0 1143.27 455.086   1
  11   7   2 533.133 320.939   1
  11   7   4 3983.45 781.203   1
  11   7   6 1662.48 538.933   1
  11   7   8 412.785 312.299   1
 -11  -7 -10 135.460 495.025   3
  11   7  10 388.118 323.014   1
  11  -8 -19 1209.46 632.520   2
  11  -8 -17 720.055 486.268   2
 -11   8  15 2533.86 622.113   1
  11  -8 -15 2247.43 651.796   2
  11  -8 -13 7127.84 1064.62   2
  11  -8 -11 78.7630 245.259   2
  11   8  -9 1174.50 364.880   1
  11  -8  -9 1507.19 490.327   2
  11   8  -7 7422.31 887.743   1
  11   8  -5 6358.92 879.931   1
  11   8  -3 98.1270 189.841   1
  11   8  -1 26.5958 247.298   1
  11   8   1 14.1445 260.103   1
  11   8   3 186.133 306.826   1
  11   8   5 997.959 440.157   1
  11   8   7 353.555 380.258   1
  11   8   9 423.813 375.092   1
  11   8  11 239.230 352.712   1
  11  -9 -18 511.496 393.848   2
 -11   9  16-183.822 264.428   1
  11  -9 -16 211.610 382.062   2
 -11   9  14-234.383 292.621   1
  11  -9 -14-132.009 289.483   2
  11  -9 -12 7809.50 1111.57   2
  11   9 -10 8677.65 938.113   1
  11  -9 -10 13128.1 1371.03   2
  11   9  -8 157.266 229.438   1
  11   9  -6 2697.23 585.793   1
  11   9  -4 17800.4 1522.30   1
  11   9  -2 12910.7 1334.26   1
  11   9   0 19413.4 1661.46   1
  11   9   2 11516.8 1301.37   1
  11   9   4 1653.12 596.942   1
  11   9   6 4431.48 881.270   1
  11   9   8 2157.34 657.097   1
  11 -10 -17 4881.33 988.520   2
 -11  10  15 2747.88 707.376   1
  11 -10 -15 1967.76 638.044   2
  11 -10 -13 17548.1 1711.89   2
 -11  10  13 18984.0 1799.30   1
  11 -10 -11 18863.8 1737.87   2
  11  10  -9 16049.4 1387.86   1
  11 -10  -9 24042.2 1873.42   2
  11  10  -7 31513.3 2010.80   1
  11  10  -5 4271.41 788.552   1
  11  10  -3 1283.10 498.758   1
  11  10  -1 10730.3 1270.12   1
  11  10   1 677.320 393.595   1
  11  10   3-140.594 320.534   1
  11  10   5 2024.33 619.254   1
  11  10   7 1179.39 522.233   1
  11 -11 -16 433.863 389.134   2
 -11  11  16-447.122 353.371   1
 -11  11  14 93.9031 259.041   1
  11 -11 -14 295.454 346.049   2
 -11  11  12 6099.10 1117.31   1
  11 -11 -12 4330.15 886.751   2
  11 -11 -10 12678.0 1431.36   2
  11  11  -8 17313.0 1509.02   1
  11 -11  -8 22322.8 1848.30   2
  11  11  -6 27633.0 1984.11   1
  11  11  -4 10927.3 1270.22   1
  11  11  -2 4785.39 870.909   1
  11  11   0 33121.8 2325.14   1
  11  11   2 45631.4 2815.10   1
  11  11   4 11342.0 1417.62   1
  11  11   6 7933.16 1205.50   1
 -11  12  15 11220.7 1502.93   1
  11 -12 -15 10925.3 1489.46   2
  11 -12 -13 15064.6 1650.80   2
 -11  12  13 14689.8 1753.86   1
  11 -12 -11 11082.3 1373.20   2
 -11  12  11 9770.66 1447.76   1
 -11  12   9 12168.8 1583.44   1
  11 -12  -9 12310.9 1409.89   2
  11  12  -7 14014.0 1445.45   1
  11 -12  -7 17627.1 1705.53   2
  11  12  -5 6099.78 994.105   1
  11  12  -3 6149.85 1015.07   1
  11  12  -1 3691.75 836.231   1
  11  12   1-152.430 290.733   1
  11  12   3 219.621 323.301   1
 -11  13  14 2111.05 695.520   1
 -11  13  12 4324.64 1048.71   1
 -11  13  10 1710.69 697.760   1
  11  13  -8 1700.13 543.282   1
 -11  13   8 1868.36 676.737   1
  11  13  -6 5435.55 961.677   1
  11  13  -4 10116.5 1325.15   1
  11  13  -2 11680.8 1462.54   1
  11  13   0 8786.81 1303.76   1
  11  13   2 3959.30 884.189   1
  11  14  -7 41.1485 227.325   1
 -11  14   7-662.405 496.976   1
  11  14  -5 0.81809 220.535   1
 -11  14   5-299.389 399.944   1
  11  14  -3 1012.64 485.191   1
 -11  14   3 744.276 524.771   1
  12   0 -22 10239.9 1458.09   2
  12   0 -20 4213.32 937.211   2
  12   0 -18 4702.07 867.470   2
  12   0 -16 30650.1 2040.19   2
  12   0 -14 58032.5 2701.04   2
  12   0 -12 61235.6 2661.47   2
  12   0 -10 84887.4 2794.26   1
  12   0 -10 94070.4 3176.58   2
  12   0  -8 50008.3 2084.08   1
  12   0  -6 39262.3 1893.83   1
  12   0  -4 132629. 3877.69   1
  12   0  -2 27603.8 1655.17   1
  12   0   0 14339.6 1226.97   1
 -12   0  -2 56706.7 2324.21   3
  12   0   2 57769.9 2586.66   1
 -12   0  -4 1138.67 372.675   3
  12   0   4 1277.62 424.404   1
 -12   0  -6 431.588 305.520   3
  12   0   6 1.70585 263.584   1
 -12   0  -8 239.454 327.035   3
  12   0   8 98.6034 202.152   1
 -12   0 -10-509.754 409.101   3
 -12   0 -12 1663.31 627.025   3
  12   1 -21 664.351 420.660   2
  12  -1 -21 94.2052 398.634   2
  12   1 -19 684.911 364.969   2
  12  -1 -19 2091.25 640.290   2
  12   1 -17 3771.81 749.322   2
  12  -1 -17 4951.27 951.876   2
  12   1 -15 4907.75 796.036   2
  12  -1 -15 4222.87 765.758   2
  12   1 -13 6581.04 863.660   2
  12  -1 -13 6398.12 881.641   2
  12   1 -11 5165.62 615.788   1
  12   1 -11 4792.94 706.760   2
  12  -1 -11 5232.11 765.432   2
  12   1  -9 38588.3 1783.72   1
  12   1  -9 43632.0 2002.55   2
  12  -1  -9 42394.5 2075.94   2
  12  -1  -9 41397.9 1883.00   1
  12  -1  -7 27349.5 1558.48   1
  12   1  -7 27903.2 1566.59   1
  12  -1  -5 17818.9 1269.31   1
  12   1  -5 19219.4 1331.37   1
  12  -1  -3 44860.7 2109.48   1
  12   1  -3 47354.7 2172.58   1
  12  -1  -1 89127.8 3183.52   1
  12   1  -1 90875.5 3215.45   1
 -12   1   1 85375.2 2400.01   3
  12  -1   1 54879.5 2479.21   1
 -12   1  -1 51067.4 2011.94   3
  12   1   1 53405.1 2484.12   1
  12  -1   3 23884.5 1645.59   1
 -12   1  -3 25385.0 1551.66   3
  12   1   3 26994.4 1765.10   1
  12  -1   5 23048.8 1662.46   1
 -12  -1  -5 27056.5 1860.42   3
  12   1   5 23679.8 1710.48   1
 -12   1  -5 24718.2 1675.53   3
 -12  -1  -7 3653.41 781.670   3
 -12   1  -7 4121.29 773.925   3
  12  -1   7 3485.14 670.552   1
  12   1   7 4213.35 763.257   1
  12   1   9 7454.10 1014.51   1
 -12  -1  -9 9160.15 1274.29   3
 -12   1  -9 9344.61 1245.08   3
  12  -1   9 6867.86 959.493   1
 -12  -1 -11 9528.37 1433.70   3
 -12   1 -11 8075.99 1273.42   3
  12   2 -22 1492.74 563.226   2
  12  -2 -22 713.522 453.153   2
  12   2 -20 4261.47 881.982   2
  12  -2 -20 5360.24 1006.50   2
  12   2 -18 19055.1 1689.29   2
  12  -2 -18 17961.7 1733.13   2
  12   2 -16 11860.0 1236.52   2
  12  -2 -16 14223.4 1443.76   2
  12   2 -14 624.129 296.993   2
  12  -2 -14-168.487 313.938   2
  12   2 -12 10609.2 847.164   1
  12   2 -12 11678.5 1062.60   2
  12  -2 -12 10855.6 1135.82   2
  12   2 -10 92564.8 2908.67   1
  12   2 -10 95020.8 3114.66   2
  12  -2 -10 99959.4 3472.31   2
  12   2  -8 51113.6 2145.53   1
  12   2  -8 53190.8 2149.70   2
  12  -2  -6 4834.46 672.922   1
  12   2  -6 5168.74 689.965   1
  12  -2  -4 45979.1 2156.56   1
  12   2  -4 46285.2 2140.87   1
  12  -2  -2 19529.1 1399.04   1
  12   2  -2 21932.6 1496.55   1
  12  -2   0-1.91202 213.530   1
  12   2   0 46.4950 203.685   1
  12  -2   2 9575.26 1029.97   1
 -12   2  -2 8696.10 806.863   3
  12   2   2 8387.98 994.981   1
  12  -2   4 5889.86 828.583   1
 -12   2  -4 4873.41 686.214   3
  12   2   4 4776.87 787.669   1
 -12  -2  -6 228.706 279.504   3
  12  -2   6 796.586 350.817   1
 -12   2  -6 345.146 248.343   3
  12   2   6 279.871 211.306   1
 -12  -2  -8 9.54545 290.252   3
  12  -2   8-81.8791 207.977   1
 -12   2  -8 473.273 329.484   3
  12   2   8-366.106 288.186   1
 -12  -2 -10-251.992 374.251   3
  12   2  10 478.788 311.166   1
 -12  -2 -12 169.494 288.938   3
  12   3 -21-321.282 362.422   2
  12  -3 -21-15.3001 413.267   2
  12   3 -19-218.882 295.539   2
  12  -3 -19 448.473 471.427   2
  12   3 -17 194.244 270.674   2
  12  -3 -17 125.588 290.935   2
  12   3 -15-120.732 177.935   2
  12  -3 -15 144.710 289.432   2
  12   3 -13 1384.37 391.104   2
  12  -3 -13 2048.34 530.709   2
  12   3 -11-107.934 193.755   1
  12   3 -11-65.0521 148.858   2
  12  -3 -11-256.044 237.007   2
  12   3  -9 12415.1 996.392   1
  12   3  -9 12365.4 1017.52   2
  12   3  -7 11298.9 995.657   1
  12   3  -5 3781.27 595.609   1
  12  -3  -3 3064.08 597.260   1
  12   3  -3 2772.51 552.739   1
  12  -3  -1 3425.45 615.597   1
  12   3  -1 4555.09 725.744   1
  12  -3   1 2635.22 579.793   1
  12   3   1 5491.58 793.044   1
  12  -3   3 2388.70 575.169   1
  12   3   3 3464.15 692.818   1
  12  -3   5 5603.93 830.624   1
  12   3   5 4912.70 814.032   1
  12  -3   7 2204.07 563.217   1
 -12  -3  -7 2878.92 741.109   3
  12   3   7 3210.60 735.156   1
 -12  -3  -9 404.045 370.611   3
  12   3   9 729.563 384.312   1
  12  -3   9 267.207 251.715   1
 -12  -3 -11 916.414 511.948   3
  12   4 -22 286.237 343.326   2
  12   4 -20 98.2422 249.530   2
  12  -4 -20-74.0799 292.565   2
  12   4 -18 57.5891 259.759   2
  12  -4 -18 522.058 399.818   2
  12   4 -16 199.761 190.029   2
  12  -4 -16 1039.58 518.078   2
  12   4 -14 398.422 244.846   2
  12  -4 -14 645.425 385.218   2
  12   4 -12-63.5589 183.306   1
  12   4 -12-9.75966 202.183   2
  12  -4 -12 6.41843 246.471   2
  12   4 -10 13159.1 1031.12   1
  12   4 -10 13922.9 1041.38   2
  12  -4 -10 14668.4 1348.66   2
  12   4  -8 1597.16 439.872   1
  12   4  -8 1722.57 372.645   2
  12   4  -6 6544.26 799.455   1
  12   4  -4 494.491 280.217   1
  12   4  -2 1378.37 437.325   1
  12   4   0 7429.60 945.703   1
  12   4   2 1507.72 511.050   1
  12  -4   2 1105.53 417.682   1
  12   4   4 509.936 332.995   1
  12   4   6 447.408 295.836   1
 -12  -4  -8 602.116 440.332   3
  12   4   8-0.66847 294.688   1
 -12  -4 -10-461.310 418.691   3
  12   4  10 1009.94 331.842   1
  12   5 -21-229.272 318.779   2
  12  -5 -21 130.468 363.087   2
  12   5 -19-331.822 305.744   2
  12  -5 -19-53.1118 303.782   2
  12   5 -17 1161.71 422.706   2
  12  -5 -17 872.845 511.690   2
  12   5 -15 3381.57 631.775   2
  12  -5 -15 3728.32 765.182   2
  12   5 -13 1888.10 425.276   2
  12  -5 -13 1799.06 525.528   2
  12   5 -11 5134.39 657.720   1
  12   5 -11 5831.16 670.137   2
  12  -5 -11 6767.87 939.659   2
  12   5  -9 20622.7 1366.62   1
  12   5  -9 19920.2 1161.37   2
  12   5  -7 49477.1 2230.84   1
  12   5  -7 47768.1 1791.94   2
  12   5  -5 3281.79 602.677   1
  12   5  -3 1772.84 466.375   1
  12   5  -1 8526.05 1001.60   1
  12   5   1 3363.72 669.763   1
  12   5   3 11580.0 1224.21   1
  12   5   5 6530.77 975.396   1
  12   5   7 37.1591 224.140   1
 -12  -5  -9 2157.76 722.683   3
  12   5   9 1846.56 572.454   1
 -12  -5 -11 2738.91 910.634   3
  12  -6 -20 1566.68 551.299   2
  12  -6 -18 5696.91 1062.66   2
  12  -6 -16 33151.5 2364.65   2
  12  -6 -14 11950.8 1377.25   2
  12  -6 -12 7276.85 1035.55   2
  12   6 -10 37816.5 1887.54   1
  12  -6 -10 42449.0 2398.89   2
  12   6  -8 17497.2 1310.51   1
  12   6  -6 18575.1 1394.00   1
  12   6  -4 69061.5 2858.31   1
  12   6  -2 25786.9 1751.74   1
  12   6   0 682.590 297.173   1
  12   6   2 2235.77 536.691   1
  12   6   4 2392.42 606.293   1
  12   6   6-151.524 279.295   1
  12   6   8 712.197 405.633   1
 -12  -6 -10 643.088 423.809   3
  12   6  10 471.719 371.080   1
  12  -7 -19 188.087 394.874   2
  12  -7 -17 5652.38 1044.98   2
  12  -7 -15 206.561 299.581   2
  12  -7 -13 12571.8 1391.97   2
  12   7 -11 3509.68 589.021   1
  12  -7 -11 5036.39 850.386   2
  12   7  -9 8628.08 924.501   1
  12   7  -7 18371.2 1399.21   1
  12   7  -5 24442.8 1675.11   1
  12   7  -3 64854.9 2906.29   1
  12   7  -1 31630.5 2027.50   1
  12   7   1 3675.02 721.476   1
  12   7   3 20264.4 1717.59   1
  12   7   5 16892.1 1602.97   1
  12   7   7 11965.2 1407.75   1
  12   7   9 8344.88 1190.91   1
  12   7  11 3057.68 764.916   1
  12  -8 -18 7100.66 1200.27   2
  12  -8 -16 25164.4 2153.87   2
 -12   8  16 24168.0 1918.24   1
  12  -8 -14 21504.4 1890.70   2
  12  -8 -12 19886.4 1779.59   2
  12   8 -10 17857.1 1346.70   1
  12  -8 -10 20832.7 1748.18   2
  12   8  -8 17706.3 1396.93   1
  12   8  -6 48369.5 2442.21   1
  12   8  -4 36762.5 2182.56   1
  12   8  -2 11955.7 1267.24   1
  12   8   0 5846.94 917.100   1
  12   8   2 7255.67 1043.37   1
  12   8   4 2135.98 657.149   1
  12   8   6 1.50264 309.026   1
  12   8   8 1690.57 572.881   1
  12  -9 -17 1316.02 598.880   2
 -12   9  15 2689.24 677.502   1
  12  -9 -15 1490.93 572.800   2
  12  -9 -13-204.952 293.751   2
  12  -9 -11 684.526 384.630   2
  12   9  -9 5751.92 816.264   1
  12  -9  -9 7521.43 1101.40   2
  12   9  -7 30819.7 1965.91   1
  12   9  -5 14603.4 1384.24   1
  12   9  -3 12175.3 1293.46   1
  12   9  -1 9310.52 1155.72   1
  12   9   1 11473.6 1329.80   1
  12   9   3 16314.5 1614.96   1
  12   9   5 6516.44 1047.78   1
  12   9   7 6048.28 1039.57   1
  12 -10 -18 3987.90 960.651   2
 -12  10  16 1748.54 597.782   1
  12 -10 -16 1105.57 486.766   2
 -12  10  14 848.130 458.193   1
  12 -10 -14 2280.80 670.166   2
  12 -10 -12 11260.5 1401.11   2
  12 -10 -10 12018.2 1402.97   2
  12  10  -8 1583.11 500.074   1
  12  10  -6 1566.95 498.901   1
  12  10  -4 2596.89 650.596   1
  12  10  -2 6472.38 992.729   1
  12  10   0 2770.81 703.476   1
  12  10   2 36.0286 329.581   1
  12  10   4 1116.60 547.514   1
  12  10   6 38.0894 296.153   1
  12 -11 -17-634.719 457.267   2
 -12  11  15 1327.13 592.481   1
  12 -11 -15 322.123 374.557   2
 -12  11  13-270.155 432.921   1
  12 -11 -13 1144.57 486.998   2
  12 -11 -11 2751.45 721.668   2
  12  11  -9-43.8539 195.712   1
  12 -11  -9 293.956 272.152   2
  12  11  -7 398.240 279.287   1
  12  11  -5 345.238 295.783   1
  12  11  -3-596.156 368.051   1
  12  11  -1 67.9665 285.490   1
  12  11   1 1958.22 654.281   1
  12  11   3 242.311 254.936   1
  12  11   5 304.078 275.734   1
 -12  12  16 1053.44 511.614   1
  12 -12 -16 881.529 539.977   2
 -12  12  14 432.378 479.278   1
  12 -12 -14 419.489 384.920   2
 -12  12  12-515.584 390.562   1
  12 -12 -12 336.181 355.129   2
 -12  12  10 8764.58 1382.93   1
  12 -12 -10 9905.73 1321.08   2
  12  12  -8 1568.65 501.089   1
  12 -12  -8 3343.15 783.727   2
  12  12  -6 153.526 240.632   1
  12  12  -4 2387.53 696.923   1
  12  12  -2 710.921 431.499   1
  12  12   0-160.689 277.677   1
  12  12   2 1178.57 557.074   1
 -12  13  11 436.011 321.996   1
 -12  13   9 7573.66 1331.83   1
  12 -13  -9 7647.65 1163.29   2
  12  13  -7 1488.08 532.501   1
  12 -13  -7 2295.17 655.326   2
  12  13  -5 322.499 329.326   1
  12  13  -3 6692.01 1108.61   1
  12  13  -1 6329.30 1104.53   1
  12  14  -6 5677.38 1006.74   1
  12  14  -4 12426.8 1525.29   1
  13   0 -21 96.5956 328.989   2
  13   0 -19 131.544 252.425   2
  13   0 -17-238.469 339.221   2
  13   0 -15 361.802 304.014   2
  13   0 -13 467.650 342.270   2
  13   0 -11 331.784 262.278   1
  13   0 -11 228.120 277.369   2
  13   0  -9-65.7015 206.457   1
  13   0  -7 473.030 257.717   1
  13   0  -5-23.0563 184.653   1
  13   0  -3 378.458 307.107   1
  13   0  -1 493.166 331.369   1
 -13   0  -1 339.846 254.399   3
  13   0   1 699.320 345.377   1
 -13   0  -3 227.828 211.879   3
  13   0   3-263.883 287.172   1
 -13   0  -5 122.068 227.790   3
  13   0   5-764.399 365.771   1
 -13   0  -7-25.1947 235.355   3
  13   0   7-237.791 254.638   1
 -13   0  -9 374.010 386.893   3
  13   0   9 2.64628 212.216   1
  13   1 -22 1162.95 567.055   2
  13  -1 -22-2.89878 314.528   2
  13   1 -20-3.26544 278.634   2
  13  -1 -20 179.435 334.070   2
  13   1 -18 7.67353 278.535   2
  13  -1 -18 821.098 431.615   2
  13   1 -16 4794.42 835.323   2
  13  -1 -16 3449.24 751.252   2
  13   1 -14 1992.23 527.170   2
  13  -1 -14 2302.28 600.511   2
  13   1 -12 5692.77 667.657   1
  13   1 -12 5237.41 758.122   2
  13  -1 -12 6123.04 866.259   2
  13   1 -10 12910.4 1045.74   1
  13   1 -10 11416.1 1089.01   2
  13  -1 -10 14484.0 1252.04   2
  13  -1  -8 999.485 345.648   1
  13   1  -8 842.170 321.935   1
  13  -1  -6 123.303 252.440   1
  13   1  -6 68.8237 207.264   1
  13  -1  -4-80.1087 216.982   1
  13   1  -4 13.1184 194.981   1
  13  -1  -2 3191.39 609.468   1
  13   1  -2 1403.30 470.120   1
  13  -1   0 32963.0 1941.93   1
  13   1   0 29182.8 1858.08   1
  13  -1   2 8930.42 1039.75   1
  13   1   2 5962.40 859.995   1
 -13  -1  -4 100.693 242.956   3
 -13   1  -4 368.352 256.466   3
  13  -1   4 276.598 260.518   1
  13   1   4 613.298 333.165   1
 -13  -1  -6 4469.72 832.550   3
  13  -1   6 4308.61 764.415   1
  13   1   6 2993.82 653.513   1
 -13  -1  -8 4316.21 904.520   3
  13  -1   8 3884.91 757.689   1
  13   1   8 3561.76 737.717   1
 -13  -1 -10-168.032 354.220   3
 -13  -1 -12-1280.93 576.206   3
  13   2 -21 2243.00 678.729   2
  13  -2 -21 1532.80 604.547   2
  13   2 -19 10879.9 1324.91   2
  13  -2 -19 12652.2 1504.62   2
  13   2 -17 4074.66 784.867   2
  13  -2 -17 3662.33 818.861   2
  13   2 -15 9719.26 1077.30   2
  13  -2 -15 9625.01 1172.06   2
  13   2 -13 54967.3 2103.02   1
  13   2 -13 56580.1 2545.48   2
  13  -2 -13 58789.5 2785.74   2
  13   2 -11 23506.9 1392.24   1
  13   2 -11 24140.7 1540.77   2
  13  -2 -11 26955.5 1789.69   2
  13   2  -9 13405.5 1089.04   1
  13   2  -9 11135.0 991.729   2
  13   2  -7 39950.2 2007.38   1
  13  -2  -7 42847.5 2081.25   1
  13  -2  -5 43431.7 2148.89   1
  13   2  -5 38083.4 2011.57   1
  13  -2  -3 49235.7 2346.15   1
  13   2  -3 44287.0 2237.08   1
  13  -2  -1 30236.1 1844.42   1
  13   2  -1 27454.2 1790.38   1
  13  -2   1 3325.57 641.462   1
  13   2   1 2396.22 570.744   1
  13  -2   3 10.2406 204.041   1
  13   2   3 350.763 306.012   1
 -13  -2  -5 5562.52 929.633   3
  13  -2   5 4926.40 821.444   1
  13   2   5 5172.16 847.654   1
 -13  -2  -7 6851.71 1088.62   3
  13  -2   7 4283.01 783.511   1
  13   2   7 4469.16 818.080   1
  13  -2   9 49.2949 211.995   1
 -13  -2  -9-36.3512 315.263   3
  13   2   9-268.871 277.518   1
 -13  -2 -11 57.0756 310.435   3
  13   3 -22 1061.17 526.468   2
  13   3 -20 4023.39 837.319   2
  13  -3 -20 3475.40 863.100   2
  13   3 -18 355.411 314.892   2
  13  -3 -18 600.941 389.693   2
  13   3 -16 555.646 297.764   2
  13  -3 -16 556.196 381.368   2
  13   3 -14 738.185 362.534   2
  13  -3 -14 737.377 390.963   2
  13   3 -12 158.229 169.372   1
  13  -3 -12 395.133 272.915   2
  13   3 -10 3042.45 518.105   1
  13   3 -10 2388.26 475.716   2
  13  -3 -10 3540.80 641.581   2
  13   3  -8 4610.94 665.646   1
  13   3  -8 4885.81 637.462   2
  13   3  -6 31857.1 1818.12   1
  13   3  -4 22717.7 1564.49   1
  13  -3  -4 23844.0 1623.75   1
  13  -3  -2 2123.24 511.528   1
  13   3  -2 2720.74 588.741   1
  13  -3   0 40420.9 2213.29   1
  13   3   0 37210.0 2139.80   1
  13  -3   2 44146.3 2378.52   1
  13   3   2 45614.9 2437.77   1
  13  -3   4 12860.1 1315.90   1
  13   3   4 10272.0 1200.34   1
  13  -3   6 10435.5 1195.39   1
 -13  -3  -6 13657.8 1509.98   3
  13   3   6 12273.5 1333.68   1
 -13  -3  -8 6420.74 1143.73   3
  13   3   8 5475.80 914.919   1
  13  -3   8 5480.59 877.672   1
 -13  -3 -10 2111.15 746.517   3
  13   3  10 2335.52 618.309   1
  13   4 -21 2625.47 700.429   2
  13  -4 -21 2480.57 762.282   2
  13   4 -19 12510.5 1379.81   2
  13  -4 -19 13656.5 1608.02   2
  13   4 -17 11482.1 1237.46   2
  13  -4 -17 9954.16 1306.37   2
  13   4 -15 20190.8 1520.13   2
  13  -4 -15 21154.6 1791.36   2
  13   4 -13 52175.0 2334.07   2
  13  -4 -13 51200.8 2760.48   2
  13   4 -11 32331.9 1699.37   1
  13   4 -11 32620.9 1702.03   2
  13  -4 -11 36745.7 2174.68   2
  13   4  -9 65193.4 2576.89   1
  13   4  -9 64978.7 2393.53   2
  13   4  -7 144417. 4176.66   1
  13   4  -7 134662. 3639.83   2
  13   4  -5 32743.4 1919.49   1
  13   4  -3 2729.24 580.050   1
  13   4  -1 33954.0 2048.15   1
  13   4   1 32313.1 2062.15   1
  13   4   3 3251.18 695.172   1
  13   4   5 3414.90 749.892   1
 -13  -4  -7 1964.59 635.578   3
  13   4   7 2423.55 655.995   1
 -13  -4  -9-21.0238 325.554   3
  13   4   9-97.7637 293.966   1
  13  -5 -20 1546.54 601.041   2
  13   5 -18-374.825 297.319   2
  13  -5 -18 45.0402 300.581   2
  13   5 -16 234.564 236.123   2
  13  -5 -16-135.607 255.408   2
  13   5 -14 567.274 283.172   2
  13  -5 -14 167.806 285.916   2
  13   5 -12 4012.76 586.053   1
  13   5 -12 3922.89 595.512   2
  13  -5 -12 3792.18 742.378   2
  13   5 -10 2690.82 498.918   1
  13   5 -10 2954.46 474.267   2
  13  -5 -10 2785.29 601.041   2
  13   5  -8 776.379 339.919   1
  13   5  -8 364.960 197.155   2
  13   5  -6 9446.90 1015.51   1
  13   5  -4 21096.7 1560.43   1
  13   5  -2 24036.3 1720.63   1
  13   5   0 22205.7 1697.25   1
  13   5   2 11533.7 1268.75   1
  13   5   4 6289.52 991.093   1
  13   5   6 8284.14 1151.20   1
 -13  -5  -8 10319.7 1484.68   3
  13   5   8 7121.04 1089.27   1
 -13  -5 -10 2870.68 887.718   3
  13   5  10 2128.14 625.997   1
  13  -6 -19 1637.85 670.502   2
  13  -6 -17 1200.15 556.772   2
  13  -6 -15 10193.4 1306.99   2
  13  -6 -13 26764.9 2032.69   2
  13   6 -11 16934.7 1269.79   1
  13  -6 -11 20360.5 1704.53   2
  13   6  -9 7265.73 868.505   1
  13   6  -7 7642.32 926.679   1
  13   6  -5 16195.7 1376.68   1
  13   6  -3 12011.2 1214.00   1
  13   6  -1 9618.02 1127.76   1
  13   6   1 1997.54 571.923   1
  13   6   3 917.278 418.531   1
  13   6   5 2371.86 621.482   1
  13   6   7-229.868 385.565   1
 -13  -6  -9-1082.08 588.161   3
  13   6   9 207.640 266.279   1
  13  -7 -18 708.111 482.911   2
  13  -7 -16-238.955 472.858   2
  13  -7 -14 219.697 325.303   2
  13  -7 -12-44.0151 258.820   2
  13   7 -10 570.674 317.386   1
  13  -7 -10 1522.81 529.989   2
  13   7  -8 2341.20 529.927   1
  13   7  -6 4043.92 710.202   1
  13   7  -4 245.323 270.259   1
  13   7  -2 863.826 417.744   1
  13   7   0 783.854 366.758   1
  13   7   2 233.141 295.585   1
  13   7   4 871.166 415.893   1
  13   7   6 727.413 401.456   1
  13   7   8 654.870 399.165   1
  13  -8 -19 366.410 412.341   2
  13  -8 -17 246.615 345.658   2
  13  -8 -15 615.964 388.971   2
  13  -8 -13 15750.1 1631.14   2
  13  -8 -11 5592.23 955.509   2
  13   8  -9-51.6916 271.785   1
  13   8  -7 301.675 319.403   1
  13   8  -5 641.007 387.934   1
  13   8  -3 1096.37 482.213   1
  13   8  -1 1653.00 542.486   1
  13   8   1 378.977 273.853   1
  13   8   3-391.633 322.043   1
  13   8   5 1595.40 584.839   1
  13   8   7-153.684 265.860   1
  13  -9 -18 184.559 330.708   2
 -13   9  16 367.418 305.284   1
  13  -9 -16-278.910 348.986   2
  13  -9 -14 44.3237 313.134   2
  13  -9 -12 3908.14 859.242   2
  13   9 -10-288.296 337.839   1
  13  -9 -10-233.144 303.484   2
  13   9  -8 1058.71 416.637   1
  13   9  -6 3343.94 672.541   1
  13   9  -4 6372.43 954.592   1
  13   9  -2 2103.93 582.454   1
  13   9   0 5545.00 951.232   1
  13   9   2 3842.48 848.988   1
  13   9   4 144.266 280.779   1
  13   9   6 2405.28 747.515   1
  13 -10 -17 7786.87 1283.83   2
 -13  10  15 7553.04 1192.28   1
  13 -10 -15 6866.70 1186.62   2
  13 -10 -13 14221.2 1630.32   2
  13 -10 -11 16218.1 1675.48   2
  13  10  -9 16706.3 1480.81   1
  13 -10  -9 22209.3 1945.85   2
  13  10  -7 39396.6 2377.47   1
  13  10  -5 8120.93 1109.96   1
  13  10  -3 734.410 413.688   1
  13  10  -1 11024.4 1352.23   1
  13  10   1 8277.65 1197.76   1
  13  10   3 1671.86 602.257   1
  13  10   5 1227.38 556.558   1
 -13  11  16 397.307 371.342   1
  13 -11 -16-164.299 359.177   2
 -13  11  14-765.752 468.728   1
  13 -11 -14 1183.26 435.949   2
  13 -11 -12 1497.36 550.374   2
  13 -11 -10 0.81802 327.781   2
  13  11  -8 195.568 249.010   1
  13 -11  -8 673.616 422.357   2
  13  11  -6 10940.9 1305.56   1
  13  11  -4 9800.91 1283.72   1
  13  11  -2 3504.63 787.869   1
  13  11   0 6067.23 1056.10   1
  13  11   2 11303.1 1449.41   1
 -13  12  15 10006.0 1527.96   1
  13 -12 -15 10658.1 1496.94   2
  13 -12 -13 21425.5 2059.74   2
 -13  12  13 21143.8 2152.21   1
  13 -12 -11 11221.7 1491.64   2
 -13  12  11 12821.6 1663.52   1
  13 -12  -9 7187.87 1151.37   2
  13  12  -7 13706.9 1496.77   1
  13  12  -5 12809.7 1475.58   1
  13  12  -3 8195.65 1199.52   1
  13  12  -1 6930.74 1123.68   1
  13  12   1 3379.89 817.805   1
  13 -13 -10 1709.06 569.257   2
  13  13  -8-403.923 332.653   1
  13 -13  -8 153.022 277.093   2
  13  13  -6-708.788 408.513   1
  13  13  -4 851.033 478.750   1
  13  13  -2 7090.74 1186.33   1
  13  14  -7 525.783 361.007   1
  14   0 -22 12272.5 1627.94   2
  14   0 -20 1201.47 536.223   2
  14   0 -18 1836.64 594.394   2
  14   0 -16 27636.9 2004.84   2
  14   0 -14 40575.9 2294.50   2
  14   0 -12 67565.3 2936.12   2
  14   0 -10 75814.9 2838.92   1
  14   0 -10 68924.9 2888.07   2
  14   0  -8 19879.2 1424.29   1
  14   0  -6 16996.5 1348.49   1
  14   0  -4 115345. 3863.42   1
  14   0  -2 120629. 4061.73   1
  14   0   0 12127.8 1240.88   1
  14   0   2 14769.9 1393.23   1
  14   0   4 6356.52 938.509   1
  14   0   6 163.920 219.461   1
  14   0   8 3796.17 781.415   1
  14   1 -21-116.636 357.149   2
  14  -1 -21 278.526 366.329   2
  14   1 -19 1093.81 479.628   2
  14  -1 -19 1102.05 529.326   2
  14   1 -17 5303.73 909.485   2
  14  -1 -17 4587.64 896.697   2
  14   1 -15 495.497 353.167   2
  14  -1 -15 792.643 441.369   2
  14   1 -13 323.651 273.449   2
  14  -1 -13 525.234 304.071   2
  14   1 -11 1686.20 441.351   1
  14   1 -11 2407.53 535.379   2
  14  -1 -11 1978.90 503.159   2
  14  -1  -9 6176.29 800.128   1
  14   1  -9 5635.40 746.877   1
  14  -1  -7 1018.33 364.584   1
  14   1  -7 1919.54 487.394   1
  14  -1  -5 1517.31 440.537   1
  14   1  -5 709.178 360.152   1
  14  -1  -3 47319.1 2384.75   1
  14   1  -3 46836.2 2387.02   1
  14  -1  -1 17112.0 1446.99   1
  14   1  -1 19531.8 1557.47   1
  14  -1   1 3630.92 712.501   1
  14   1   1 2723.63 596.653   1
  14  -1   3 7577.34 1008.53   1
 -14  -1  -3 7459.02 960.782   3
  14   1   3 7910.24 1034.93   1
  14  -1   5 8802.12 1120.58   1
  14   1   5 8619.41 1121.04   1
 -14  -1  -5 10140.7 1230.62   3
 -14  -1  -7 6415.29 1060.83   3
  14  -1   7 3802.85 772.497   1
  14   1   7 4784.19 863.153   1
  14  -1   9 2762.91 660.722   1
  14   1   9 3312.40 725.830   1
  14   2 -22 831.597 525.634   2
  14   2 -20 887.857 472.121   2
  14  -2 -20 2451.40 727.477   2
  14   2 -18 7468.01 1079.75   2
  14  -2 -18 8202.32 1207.97   2
  14   2 -16 23629.2 1787.47   2
  14  -2 -16 25556.9 1986.98   2
  14   2 -14 8619.90 1015.10   2
  14  -2 -14 7893.54 1080.50   2
  14   2 -12 3103.69 536.945   1
  14   2 -12 3592.82 643.265   2
  14  -2 -12 3387.99 696.139   2
  14   2 -10 20109.1 1377.27   1
  14   2 -10 18382.5 1343.84   2
  14  -2 -10 20524.1 1592.26   2
  14   2  -8 46451.9 2221.05   1
  14  -2  -8 45277.3 2240.07   1
  14  -2  -6 34338.3 1983.86   1
  14   2  -6 36267.2 2015.88   1
  14  -2  -4 14710.7 1308.28   1
  14   2  -4 15312.9 1332.34   1
  14  -2  -2 13645.9 1281.86   1
  14   2  -2 14431.9 1318.09   1
  14  -2   0 12896.1 1279.46   1
  14   2   0 14940.6 1372.22   1
  14  -2   2 12632.2 1291.03   1
  14   2   2 15015.3 1437.48   1
 -14  -2  -4 2684.12 636.986   3
  14  -2   4 1940.47 556.943   1
  14   2   4 2040.80 575.246   1
 -14  -2  -6-0.76929 233.714   3
  14  -2   6-16.1255 288.228   1
  14   2   6-22.4505 327.982   1
  14  -2   8 2123.82 583.571   1
 -14  -2  -8 1864.19 639.377   3
  14   2   8 1437.78 513.382   1
 -14  -2 -10 230.019 342.375   3
  14   3 -21 375.258 342.593   2
  14  -3 -21 19.9910 334.468   2
  14   3 -19 378.159 387.464   2
  14  -3 -19 567.346 412.190   2
  14   3 -17-41.8069 230.483   2
  14  -3 -17 306.283 313.741   2
  14   3 -15 638.908 353.458   2
  14  -3 -15 772.278 390.200   2
  14   3 -13 101.995 219.893   2
  14  -3 -13 244.091 300.617   2
  14   3 -11 3319.71 558.837   1
  14   3 -11 3002.36 556.146   2
  14  -3 -11 3791.30 743.180   2
  14   3  -9-19.6715 193.537   1
  14   3  -9 242.949 226.936   2
  14   3  -7 8687.75 960.629   1
  14   3  -5 5961.66 843.438   1
  14  -3  -5 5941.90 836.063   1
  14  -3  -3 1608.02 471.476   1
  14   3  -3 896.124 377.144   1
  14  -3  -1 114.764 248.988   1
  14   3  -1 123.326 237.935   1
  14  -3   1 736.052 399.251   1
  14   3   1 493.881 367.787   1
  14  -3   3 2063.17 569.621   1
  14   3   3 2182.31 604.881   1
 -14  -3  -5 1013.65 479.254   3
  14  -3   5 1241.98 462.982   1
  14   3   5 1127.40 444.238   1
 -14  -3  -7 872.574 469.008   3
  14   3   7 940.872 444.147   1
  14  -3   7 350.401 265.297   1
 -14  -3  -9 1087.38 539.217   3
  14   3   9 921.219 431.750   1
  14   4 -22 48.1512 265.285   2
  14   4 -20 389.230 336.872   2
  14  -4 -20-176.210 296.516   2
  14   4 -18 231.922 262.297   2
  14  -4 -18 385.057 444.341   2
  14   4 -16 1790.99 505.178   2
  14  -4 -16 2470.07 669.167   2
  14   4 -14 390.603 278.898   2
  14  -4 -14-87.0507 249.650   2
  14   4 -12-43.7901 205.312   1
  14   4 -12 242.384 251.237   2
  14   4 -10 33.7679 234.324   1
  14   4 -10 160.152 167.958   2
  14   4  -8 956.865 387.180   1
  14   4  -8 837.328 342.379   2
  14   4  -6 658.983 367.103   1
  14   4  -4 5567.51 824.290   1
  14   4  -2 256.563 229.682   1
  14   4   0 2275.00 614.599   1
  14   4   2 82.7683 304.666   1
  14   4   4 844.480 462.346   1
 -14  -4  -6 381.469 314.795   3
  14   4   6 1065.73 465.140   1
 -14  -4  -8-53.3371 391.204   3
  14   4   8 252.911 263.075   1
 -14  -4 -10 933.800 561.272   3
  14   4  10-533.556 348.856   1
  14  -5 -19 1532.92 602.937   2
  14  -5 -17 376.185 289.856   2
  14  -5 -15 173.923 305.064   2
  14   5 -13 697.173 299.079   2
  14  -5 -13 464.707 356.483   2
  14   5 -11 2881.48 560.062   1
  14   5 -11 2998.99 523.777   2
  14  -5 -11 3723.78 775.862   2
  14   5  -9 2998.01 592.741   1
  14   5  -9 2947.21 490.248   2
  14   5  -7 3673.08 667.793   1
  14   5  -7 2637.41 454.588   2
  14   5  -5 16.7683 258.740   1
  14   5  -3 2018.95 575.215   1
  14   5  -1 3967.94 768.893   1
  14   5   1 408.162 344.002   1
  14   5   3 563.517 385.025   1
  14   5   5 2644.33 711.357   1
 -14  -5  -7 1006.07 515.590   3
  14   5   7 1341.62 539.055   1
 -14  -5  -9 409.500 437.595   3
  14   5   9 486.684 358.183   1
  14  -6 -20 2719.50 851.120   2
  14  -6 -18 4657.14 988.889   2
  14  -6 -16 15739.7 1688.77   2
  14  -6 -14 11890.8 1409.31   2
  14  -6 -12 11975.8 1374.29   2
  14   6 -10 29709.3 1826.71   1
  14   6  -8 17493.9 1432.14   1
  14   6  -6 17411.7 1467.21   1
  14   6  -4 47300.1 2510.25   1
  14   6  -2 16342.0 1495.90   1
  14   6   0 5216.70 890.162   1
  14   6   2 9026.53 1188.08   1
  14   6   4 2228.73 654.416   1
  14   6   6 967.259 446.704   1
 -14  -6  -8 1553.69 730.138   3
  14   6   8 1374.49 549.419   1
  14  -7 -19 1124.12 614.599   2
  14  -7 -17 6177.58 1138.42   2
  14  -7 -15 2057.63 611.261   2
  14  -7 -13 2338.26 691.623   2
  14   7 -11 421.423 268.519   1
  14  -7 -11 551.274 335.665   2
  14   7  -9 11580.7 1170.73   1
  14   7  -7 3135.62 654.789   1
  14   7  -5-209.740 277.944   1
  14   7  -3 5495.93 895.994   1
  14   7  -1 13998.5 1443.55   1
  14   7   1 2580.04 703.901   1
  14   7   3 9060.80 1234.23   1
  14   7   5 9905.13 1330.80   1
  14   7   7 940.557 524.774   1
  14  -8 -18 7150.63 1239.28   2
  14  -8 -16 19148.3 1919.05   2
  14  -8 -14 8069.97 1222.10   2
  14  -8 -12 10258.1 1361.35   2
  14   8 -10 51623.1 2552.90   1
  14  -8 -10 61660.4 3227.04   2
  14   8  -8 28454.7 1935.16   1
  14   8  -6 16820.2 1508.22   1
  14   8  -4 33001.2 2175.18   1
  14   8  -2 13860.4 1433.51   1
  14   8   0 8389.79 1162.29   1
  14   8   2 9095.11 1239.68   1
  14   8   4 7739.78 1190.77   1
  14   8   6 1929.67 661.057   1
  14  -9 -17 874.849 519.811   2
  14  -9 -15-405.314 363.779   2
  14  -9 -13 190.488 306.893   2
  14  -9 -11-107.276 379.870   2
  14   9  -9 76.9324 205.511   1
  14   9  -7 954.163 443.508   1
  14   9  -5 2227.55 594.276   1
  14   9  -3 4063.25 799.929   1
  14   9  -1 6287.69 1023.24   1
  14   9   1 2612.39 732.951   1
  14   9   3 3848.84 863.271   1
  14   9   5 3505.44 839.576   1
 -14  10  16 1886.38 636.048   1
  14 -10 -16 2854.19 824.519   2
  14 -10 -14 2542.99 719.199   2
  14 -10 -12 1598.34 561.367   2
  14 -10 -10 5249.77 983.218   2
  14  10  -8 8627.55 1125.10   1
  14  10  -6 8928.69 1167.00   1
  14  10  -4 2763.91 677.141   1
  14  10  -2 829.811 472.334   1
  14  10   0 3339.97 762.630   1
  14  10   2 1755.39 581.825   1
 -14  11  15 1140.78 505.622   1
  14 -11 -15 2248.58 705.312   2
  14 -11 -13 1172.82 529.659   2
  14 -11 -11 1623.11 592.528   2
  14  11  -9 83.8654 274.177   1
  14 -11  -9-508.482 389.848   2
  14  11  -7 711.722 408.872   1
  14  11  -5 159.248 252.400   1
  14  11  -3 118.584 267.640   1
  14  11  -1 226.218 335.175   1
  14  11   1 631.772 424.470   1
  14 -12 -14-787.314 463.387   2
 -14  12  12-416.454 430.473   1
  14 -12 -12-788.695 472.125   2
  14 -12 -10 5078.35 992.940   2
  14  12  -8 2285.27 667.221   1
  14 -12  -8 3294.77 838.197   2
  14  12  -6 105.229 241.731   1
  14  12  -4 964.527 558.038   1
  14  12  -2 848.217 490.500   1
  14 -13 -11 645.817 437.041   2
  14 -13  -9 1173.26 507.030   2
  14  13  -7 1584.90 570.737   1
  14 -13  -7 1225.78 519.176   2
  14  13  -5-561.461 384.957   1
  15   0 -21 228.835 344.610   2
  15   0 -19-63.1809 250.179   2
  15   0 -17 491.420 354.882   2
  15   0 -15 318.395 400.928   2
  15   0 -13 227.600 281.247   2
  15   0 -11 313.263 246.223   1
  15   0 -11 438.582 344.245   2
  15   0  -9 83.6126 227.046   1
  15   0  -7-207.837 315.306   1
  15   0  -5 475.190 381.138   1
  15   0  -3 606.643 354.260   1
  15   0  -1-492.124 329.223   1
  15   0   1 132.627 281.024   1
  15   0   3-4.06828 269.678   1
  15   0   5 253.469 275.399   1
  15   0   7 714.344 399.418   1
  15   1 -22 786.748 499.350   2
  15   1 -20-147.142 389.636   2
  15  -1 -20 839.022 478.721   2
  15   1 -18 455.383 314.363   2
  15  -1 -18 1322.30 563.419   2
  15   1 -16 1029.62 449.551   2
  15  -1 -16 1831.79 555.810   2
  15   1 -14 11404.8 1220.73   2
  15  -1 -14 9823.29 1179.48   2
  15   1 -12 126.501 189.963   1
  15   1 -12-205.176 240.252   2
  15  -1 -12 105.174 223.145   2
  15   1 -10 1879.56 486.768   1
  15   1 -10 1679.66 444.367   2
  15  -1 -10 2450.75 538.355   1
  15  -1  -8 505.641 321.681   1
  15   1  -8 304.921 222.130   1
  15  -1  -6 928.511 388.120   1
  15   1  -6 1469.05 439.247   1
  15  -1  -4 2593.26 589.253   1
  15   1  -4 1762.21 498.623   1
  15  -1  -2 2327.16 577.655   1
  15   1  -2 1895.48 541.616   1
  15  -1   0 721.097 359.736   1
  15   1   0 128.102 238.354   1
  15  -1   2 971.436 436.072   1
  15   1   2 600.435 399.988   1
  15  -1   4 202.790 289.857   1
  15   1   4 809.865 396.260   1
  15  -1   6 221.383 301.486   1
  15   1   6 208.395 291.365   1
  15  -1   8 283.061 265.661   1
  15   1   8 442.738 334.986   1
  15   2 -21 795.168 427.848   2
  15  -2 -21 1322.68 582.321   2
  15   2 -19 4548.13 858.733   2
  15  -2 -19 3652.70 856.032   2
  15   2 -17 2104.31 581.956   2
  15  -2 -17 2403.04 669.480   2
  15  -2 -15 8248.12 1131.35   2
  15   2 -15 5845.10 884.811   2
  15   2 -13 35260.9 1841.83   1
  15   2 -13 33809.1 2025.05   2
  15   2 -11 19518.2 1416.52   1
  15   2 -11 20843.8 1515.94   2
  15  -2 -11 22504.9 1768.22   2
  15   2  -9 9588.10 1026.39   1
  15   2  -9 9101.43 982.271   2
  15  -2  -7 47369.7 2414.34   1
  15   2  -7 44036.5 2300.61   1
  15  -2  -5 26785.9 1847.83   1
  15   2  -5 25876.5 1791.66   1
  15  -2  -3 14958.4 1392.70   1
  15   2  -3 14264.6 1366.75   1
  15  -2  -1 23744.2 1785.59   1
  15   2  -1 23260.4 1773.43   1
  15   2   1 6944.77 1029.89   1
  15  -2   1 6018.88 928.474   1
 -15  -2  -3 3720.45 754.350   3
  15  -2   3 3912.25 788.795   1
  15   2   3 3362.85 713.364   1
  15  -2   5 4011.41 813.409   1
  15   2   5 5293.87 942.141   1
  15  -2   7 1234.05 467.047   1
  15   2   7 1862.69 553.338   1
  15   2   9-266.337 320.146   1
  15   3 -22 1524.28 575.953   2
  15   3 -20 3983.69 837.531   2
  15  -3 -20 5615.85 1080.95   2
  15   3 -18 1991.16 584.776   2
  15  -3 -18 2827.43 757.719   2
  15   3 -16 2396.44 592.017   2
  15  -3 -16 4182.09 880.869   2
  15   3 -14 763.417 378.557   2
  15  -3 -14-10.4895 261.398   2
  15   3 -12 1736.63 424.093   1
  15   3 -12 1672.48 467.307   2
  15   3 -10 4131.79 685.935   1
  15   3 -10 4218.93 648.781   2
  15   3  -8 11311.2 1142.46   1
  15   3  -6 3454.51 670.695   1
  15   3  -4 10729.6 1167.21   1
  15  -3  -4 12185.6 1261.74   1
  15  -3  -2 1779.17 547.420   1
  15   3  -2 492.319 330.502   1
  15  -3   0 4700.53 837.189   1
  15   3   0 4031.08 764.928   1
  15  -3   2 10554.5 1246.46   1
  15   3   2 9187.73 1181.27   1
  15  -3   4 709.925 416.654   1
  15   3   4 1100.32 465.098   1
  15  -3   6 3220.41 746.138   1
 -15  -3  -6 2696.57 772.679   3
  15   3   6 2839.96 723.257   1
 -15  -3  -8 4418.60 1005.99   3
  15   3   8 3153.73 785.302   1
  15   4 -19 5025.85 901.267   2
  15  -4 -19 5692.99 1095.39   2
  15   4 -17 10382.7 1181.10   2
  15  -4 -17 10487.2 1390.47   2
  15   4 -15 13855.9 1286.07   2
  15  -4 -15 16416.8 1654.19   2
  15   4 -13 24955.7 1648.76   2
  15  -4 -13 26834.6 2040.06   2
  15   4 -11 20370.0 1476.72   1
  15   4 -11 21136.8 1442.52   2
  15  -4 -11 21485.4 1789.04   2
  15   4  -9 41179.5 2199.06   1
  15   4  -9 43788.8 2024.23   2
  15   4  -7 84538.7 3360.05   1
  15   4  -5 35499.2 2151.75   1
  15   4  -3 10861.1 1218.47   1
  15   4  -1 22778.5 1787.69   1
  15   4   1 17467.9 1607.56   1
  15   4   3 9669.89 1246.99   1
  15   4   5 7141.66 1112.43   1
 -15  -4  -7 2052.98 707.812   3
  15   4   7 1370.00 524.318   1
 -15  -4  -9 432.532 410.585   3
  15  -5 -20 1318.24 661.586   2
  15  -5 -18 93.8662 341.450   2
  15  -5 -16 3471.22 812.230   2
  15  -5 -14 4845.54 935.358   2
  15   5 -12 49.9378 208.507   1
  15  -5 -12 174.779 233.306   2
  15   5 -10 480.058 276.478   1
  15   5  -8 505.598 362.899   1
  15   5  -6 1745.70 498.063   1
  15   5  -4-64.2863 325.863   1
  15   5  -2 418.474 346.966   1
  15   5   0 7648.88 1097.22   1
  15   5   2 10171.8 1288.91   1
  15   5   4 3439.59 803.287   1
  15   5   6 2580.60 701.142   1
 -15  -5  -8 2925.75 845.932   3
  15   5   8 1858.29 611.325   1
  15  -6 -19 3233.85 875.026   2
  15  -6 -17-1407.44 573.659   2
  15  -6 -15 867.406 436.855   2
  15  -6 -13 13866.6 1541.44   2
  15   6 -11 23210.0 1627.26   1
  15  -6 -11 26516.4 2065.44   2
  15   6  -9 12909.0 1255.16   1
  15   6  -7 2287.26 561.693   1
  15   6  -5 7332.85 1031.99   1
  15   6  -3 16358.0 1533.09   1
  15   6  -1 10919.6 1289.84   1
  15   6   1 3722.32 793.302   1
  15   6   3 326.924 324.947   1
  15   6   5 1625.72 553.040   1
 -15  -6  -7 1728.22 663.991   3
  15   6   7 800.537 465.433   1
  15  -7 -18 676.403 459.593   2
  15  -7 -16-353.465 349.441   2
  15  -7 -14-439.059 371.495   2
  15  -7 -12 68.9953 261.323   2
  15   7 -10 137.711 225.554   1
  15   7  -8-179.656 202.811   1
  15   7  -6 9.49928 242.179   1
  15   7  -4 337.750 317.375   1
  15   7  -2 1111.80 493.282   1
  15   7   0 300.562 303.574   1
  15   7   2 193.745 320.685   1
  15   7   4 1025.18 539.361   1
  15   7   6 134.653 319.509   1
  15  -8 -17 318.011 357.607   2
  15  -8 -15 180.257 322.590   2
  15  -8 -13 7501.41 1208.28   2
  15  -8 -11 7094.70 1159.03   2
  15   8  -9 520.175 303.771   1
  15   8  -7 423.564 312.288   1
  15   8  -5 158.000 299.107   1
  15   8  -3 487.196 377.379   1
  15   8  -1 2120.28 636.643   1
  15   8   1-288.880 394.427   1
  15   8   3 75.9652 324.829   1
  15  -9 -16 610.471 466.557   2
  15  -9 -14 5557.21 1065.40   2
  15  -9 -12-654.692 436.205   2
  15   9 -10 291.833 278.095   1
  15  -9 -10 771.371 453.344   2
  15   9  -8 295.518 245.537   1
  15   9  -6-2.09135 226.118   1
  15   9  -4-62.9083 344.584   1
  15   9  -2-4.62170 321.715   1
  15   9   0-619.285 413.763   1
  15   9   2 146.733 330.896   1
  15 -10 -15 9282.50 1418.15   2
  15 -10 -13 9767.34 1430.10   2
  15 -10 -11 2160.06 706.932   2
  15  10  -9 8693.70 1153.12   1
  15  10  -7 26112.8 2034.47   1
  15  10  -5 11283.7 1374.45   1
  15  10  -3 4621.52 923.968   1
  15  10  -1 11539.6 1447.60   1
  15  10   1 5350.27 1034.68   1
 -15  11  16 657.440 461.099   1
 -15  11  14-255.342 379.906   1
  15 -11 -14 1230.17 550.697   2
  15 -11 -12-504.058 403.401   2
  15 -11 -10 2305.93 763.131   2
  15  11  -8 166.865 285.971   1
  15  11  -6 2243.74 628.685   1
  15  11  -4-545.866 405.974   1
  15  11  -2-424.064 387.754   1
  15 -12 -11 12707.3 1663.40   2
  15 -12  -9 14742.8 1775.05   2
  15  12  -7 7262.62 1138.70   1
  15  12  -5 7512.93 1182.41   1
  15  13  -8 53.0388 229.574   1
  15 -13  -8-239.114 310.043   2
  16   0 -20 4377.32 938.788   2
  16   0 -18 4235.13 854.730   2
  16   0 -16 9526.57 1208.89   2
  16   0 -14 4121.09 784.865   2
  16   0 -12 16139.8 1453.19   2
  16   0 -12 15823.3 1324.84   1
  16   0 -10 65912.8 2862.42   1
  16   0  -8 41299.8 2262.47   1
  16   0  -6 38871.7 2260.41   1
  16   0  -4 36147.6 2231.56   1
  16   0  -2 19976.0 1683.58   1
  16   0   0 16556.2 1562.93   1
  16   0   2 10350.6 1268.98   1
  16   0   4 9607.09 1253.78   1
  16   0   6 3012.47 725.184   1
  16   0   8 3245.53 737.171   1
  16   1 -21 442.533 396.907   2
  16  -1 -21 482.075 468.990   2
  16   1 -19 3997.37 866.427   2
  16  -1 -19 5805.82 1041.04   2
  16   1 -17 7710.29 1117.18   2
  16  -1 -17 8527.22 1204.75   2
  16   1 -15 2611.67 614.356   2
  16  -1 -15 1547.84 525.171   2
  16   1 -13 3429.11 617.236   1
  16   1 -13 4562.93 800.205   2
  16  -1 -13 3065.16 720.436   2
  16   1 -11 8648.11 995.175   1
  16   1 -11 9025.60 1050.08   2
  16  -1 -11 8267.63 1096.52   2
  16  -1  -9-186.263 203.246   1
  16   1  -9 143.626 257.650   1
  16  -1  -7 1787.84 479.406   1
  16   1  -7 2328.17 575.058   1
  16  -1  -5 1631.85 532.932   1
  16   1  -5 2043.24 564.302   1
  16  -1  -3 224.352 218.543   1
  16   1  -3-217.805 335.278   1
  16  -1  -1 2689.19 670.633   1
  16   1  -1 1690.63 544.908   1
  16  -1   1 225.570 343.165   1
  16   1   1-210.023 207.617   1
  16  -1   3 4138.83 843.484   1
  16   1   3 4442.78 884.933   1
  16  -1   5 1552.46 547.641   1
  16   1   5 1507.71 555.717   1
  16  -1   7 1003.58 386.721   1
  16   1   7 552.098 357.852   1
  16   2 -20-240.254 321.279   2
  16  -2 -20-313.304 347.074   2
  16   2 -18 5132.35 944.231   2
  16  -2 -18 4153.59 880.088   2
  16   2 -16 16257.0 1522.15   2
  16  -2 -16 15394.9 1586.38   2
  16   2 -14 5908.27 876.136   2
  16  -2 -14 5196.73 919.929   2
  16   2 -12 3670.97 633.139   1
  16   2 -12 3632.23 681.100   2
  16  -2 -12 2743.38 712.301   2
  16   2 -10 11006.3 1130.32   1
  16   2 -10 10862.5 1131.30   2
  16   2  -8 4450.68 757.706   1
  16  -2  -8 4233.36 745.089   1
  16  -2  -6 21558.1 1707.00   1
  16   2  -6 24312.6 1772.78   1
  16  -2  -4 45174.4 2542.47   1
  16   2  -4 46620.3 2557.31   1
  16  -2  -2 8569.93 1126.73   1
  16   2  -2 10829.3 1258.20   1
  16  -2   0 1720.66 561.497   1
  16   2   0 2184.92 618.727   1
  16  -2   2 5718.82 962.111   1
  16   2   2 5692.45 976.122   1
  16  -2   4 6094.09 1007.26   1
  16   2   4 6366.26 1045.65   1
  16  -2   6 372.933 313.075   1
  16   2   6 261.119 308.465   1
  16   2   8-76.7945 253.634   1
  16   3 -21-49.8115 259.265   2
  16   3 -19-125.002 280.643   2
  16  -3 -19 154.460 320.670   2
  16   3 -17 24.6448 220.362   2
  16  -3 -17 601.731 424.718   2
  16   3 -15 1264.58 420.821   2
  16  -3 -15 1697.23 597.438   2
  16   3 -13 483.097 285.235   2
  16  -3 -13 606.197 342.170   2
  16   3 -11-133.180 245.269   1
  16   3 -11-67.6882 237.990   2
  16  -3 -11-258.526 391.360   2
  16   3  -9-96.4115 211.256   1
  16   3  -9 48.0442 240.736   2
  16   3  -7-12.9722 211.276   1
  16   3  -5 141.573 247.764   1
  16  -3  -5 101.150 287.765   1
  16  -3  -3 272.756 284.070   1
  16   3  -3 479.128 261.869   1
  16  -3  -1 534.605 357.937   1
  16   3  -1 696.524 378.424   1
  16  -3   1-160.361 287.113   1
  16   3   1-308.387 324.244   1
  16  -3   3-129.806 337.165   1
  16   3   3-456.871 350.793   1
  16   3   5 848.360 455.749   1
  16  -3   5 976.629 457.695   1
  16   3   7 323.640 312.993   1
  16  -4 -20 80.9834 330.724   2
  16  -4 -18 83.8158 366.242   2
  16   4 -16 1544.83 485.777   2
  16  -4 -16 2446.47 736.428   2
  16   4 -14 303.928 251.499   2
  16  -4 -14-936.658 465.466   2
  16   4 -12 703.369 326.197   1
  16   4 -12 1284.56 407.460   2
  16  -4 -12 447.780 407.961   2
  16   4 -10-8.26033 202.215   1
  16   4 -10-165.315 201.802   2
  16   4  -8 2744.14 612.821   1
  16   4  -8 1639.13 453.312   2
  16   4  -6 2510.84 598.851   1
  16   4  -4 122.248 280.253   1
  16   4  -2 878.440 397.564   1
  16   4   0 412.495 362.245   1
  16   4   2 308.477 311.130   1
  16   4   4-114.183 289.108   1
  16   4   6 647.555 396.821   1
  16  -5 -19 1160.23 590.402   2
  16  -5 -17 5637.45 1057.01   2
  16  -5 -15-145.438 252.430   2
  16  -5 -13-313.170 323.837   2
  16   5 -11 1815.04 504.776   1
  16  -5 -11 1780.67 589.653   2
  16   5  -9 836.870 371.527   1
  16   5  -7 802.674 358.126   1
  16   5  -5-285.118 298.503   1
  16   5  -3 3257.95 747.844   1
  16   5  -1 659.995 344.826   1
  16   5   1 409.459 348.297   1
  16   5   3 980.381 514.192   1
  16   5   5 177.999 333.174   1
 -16  -5  -7 147.271 310.934   3
  16  -6 -18 1953.91 737.186   2
  16  -6 -16 9585.47 1357.42   2
  16  -6 -14 3058.37 767.076   2
  16  -6 -12 9535.40 1314.22   2
  16   6 -10 24108.5 1759.38   1
  16   6  -8 8617.39 1100.27   1
  16   6  -6 3246.89 700.310   1
  16   6  -4 24921.5 1948.39   1
  16   6  -2 16494.7 1664.43   1
  16   6   0 8366.11 1207.00   1
  16   6   2 10326.1 1365.94   1
  16   6   4 2192.07 714.251   1
  16  -7 -17 3719.22 910.155   2
  16  -7 -15 603.737 434.208   2
  16  -7 -13 6045.50 1082.22   2
  16   7 -11 9795.25 1120.61   1
  16  -7 -11 13377.0 1591.66   2
  16   7  -9 657.169 344.564   1
  16   7  -7 1011.25 466.672   1
  16   7  -5-496.809 341.895   1
  16   7  -3 268.798 324.537   1
  16   7  -1 113.615 297.876   1
  16   7   1 443.232 363.755   1
  16   7   3 515.704 454.559   1
  16  -8 -16 5140.60 1050.65   2
  16  -8 -14 12614.8 1608.31   2
  16  -8 -12 17530.6 1840.84   2
  16   8 -10 16341.3 1508.66   1
  16   8  -8 15732.0 1540.12   1
  16   8  -6 9473.54 1234.56   1
  16   8  -4 15123.3 1572.68   1
  16   8  -2 16031.9 1667.81   1
  16   8   0 12775.9 1523.37   1
  16   8   2 10966.7 1441.72   1
  16  -9 -15 1666.98 620.800   2
  16  -9 -13-849.352 487.414   2
  16  -9 -11 566.964 413.249   2
  16   9  -9 700.296 387.889   1
  16   9  -7 1468.67 501.544   1
  16   9  -5-126.088 296.888   1
  16   9  -3 1128.05 459.495   1
  16   9  -1 517.545 394.490   1
  16   9   1 1114.70 566.954   1
 -16  10  16 1054.00 516.041   1
  16 -10 -14 34.0876 279.493   2
  16 -10 -12 4245.44 991.364   2
  16 -10 -10 1577.69 562.355   2
  16  10  -8 2873.23 724.415   1
  16  10  -6 6079.02 1030.08   1
  16  10  -4 5026.31 1002.34   1
  16  10  -2 1407.98 558.717   1
  16 -11 -11 233.460 321.469   2
  16  11  -9-873.930 417.549   1
  16 -11  -9-539.991 424.502   2
  16  11  -7-106.996 285.166   1
  16  11  -5-163.500 322.385   1
  16  12  -8 258.565 297.781   1
  17   0 -21 29.3064 313.036   2
  17   0 -19-13.3050 249.598   2
  17   0 -17 329.767 249.452   2
  17   0 -15 451.929 290.355   2
  17   0 -13 63.8649 266.534   2
  17   0 -11 157.113 253.482   1
  17   0 -11 481.998 347.914   2
  17   0  -9 285.137 308.884   1
  17   0  -7 672.344 379.957   1
  17   0  -5-126.804 256.682   1
  17   0  -3 239.056 351.178   1
  17   0  -1 837.884 415.673   1
  17   0   1 166.127 330.277   1
  17   0   3-67.1697 259.522   1
  17   0   5 315.019 338.841   1
  17   1 -20 1381.53 547.295   2
  17  -1 -20 2574.22 850.402   2
  17   1 -18 390.444 365.961   2
  17  -1 -18 470.398 380.551   2
  17   1 -16 321.693 303.055   2
  17  -1 -16-227.541 439.791   2
  17   1 -14 3211.90 688.380   2
  17  -1 -14 2610.53 690.219   2
  17   1 -12 7944.44 984.380   1
  17   1 -12 7881.29 1027.92   2
  17  -1 -12 7973.25 1093.48   2
  17  -1 -10 3622.83 709.750   1
  17   1 -10 3546.40 672.622   1
  17   1 -10 2652.31 599.019   2
  17  -1  -8 245.407 301.416   1
  17   1  -8-68.4519 232.274   1
  17  -1  -6 2574.73 645.203   1
  17   1  -6 2260.99 603.041   1
  17  -1  -4 496.403 381.462   1
  17   1  -4 418.306 330.631   1
  17  -1  -2 268.803 330.627   1
  17   1  -2 638.540 389.992   1
  17  -1   0-50.2277 249.565   1
  17   1   0 16.4216 268.584   1
  17  -1   2 369.447 429.413   1
  17   1   2-395.772 346.357   1
  17  -1   4-290.508 314.563   1
  17   1   4-150.881 267.111   1
  17  -1   6 75.8835 262.158   1
  17   1   6 623.758 383.541   1
  17   2 -21 427.640 381.511   2
  17   2 -19 2221.16 641.692   2
  17  -2 -19 3132.43 801.726   2
  17   2 -17 383.546 335.826   2
  17  -2 -17 1237.18 493.361   2
  17   2 -15 1590.58 502.158   2
  17  -2 -15 960.783 453.805   2
  17   2 -13 8734.89 1011.07   1
  17   2 -13 11218.6 1208.07   2
  17  -2 -13 11689.4 1347.85   2
  17   2 -11 12350.5 1236.39   1
  17   2 -11 12762.2 1254.25   2
  17  -2 -11 14085.9 1493.05   2
  17   2  -9 9933.43 1135.39   1
  17   2  -7 15773.7 1483.98   1
  17  -2  -7 14937.4 1450.20   1
  17  -2  -5 15128.7 1485.21   1
  17   2  -5 11590.7 1293.59   1
  17  -2  -3 6774.12 1026.55   1
  17   2  -3 5800.46 944.813   1
  17  -2  -1 16703.2 1626.45   1
  17   2  -1 16330.6 1613.13   1
  17  -2   1 7099.82 1105.93   1
  17   2   1 5515.48 971.431   1
  17  -2   3 906.076 443.352   1
  17   2   3 833.310 484.302   1
  17  -2   5 3510.74 809.554   1
  17   2   5 2749.10 711.845   1
  17   3 -20 3855.26 852.852   2
  17   3 -18 4043.06 845.862   2
  17  -3 -18 4167.36 941.696   2
  17   3 -16 5398.98 907.903   2
  17  -3 -16 6081.46 1054.57   2
  17   3 -14 6957.80 935.268   2
  17  -3 -14 7317.60 1124.73   2
  17   3 -12 49.5246 222.747   1
  17   3 -12 469.417 286.512   2
  17  -3 -12 508.435 325.487   2
  17   3 -10 3863.23 741.228   1
  17   3 -10 4223.63 709.392   2
  17   3  -8 8929.57 1118.14   1
  17   3  -6 371.110 299.665   1
  17   3  -4 229.607 326.341   1
  17  -3  -4 926.286 400.878   1
  17  -3  -2 502.448 353.675   1
  17   3  -2-55.4592 215.037   1
  17  -3   0 913.549 459.136   1
  17   3   0-1271.34 512.170   1
  17  -3   2 389.297 333.333   1
  17   3   2-190.626 420.603   1
  17   3   4 112.419 248.430   1
  17  -3   4 395.500 339.730   1
  17  -4 -19 863.807 559.197   2
  17  -4 -17 2422.48 701.102   2
  17  -4 -15 10406.2 1392.70   2
  17  -4 -13 21001.9 1877.21   2
  17   4 -11 5945.65 854.514   1
  17   4  -9 13973.1 1392.17   1
  17   4  -7 50060.1 2699.26   1
  17   4  -5 21768.0 1803.34   1
  17   4  -3 6900.89 1037.20   1
  17   4  -1 21064.2 1878.35   1
  17   4   1 14548.8 1592.75   1
  17   4   3 1291.25 494.471   1
  17   4   5 3899.33 857.067   1
  17  -5 -18 2322.38 720.564   2
  17  -5 -16 2228.28 718.788   2
  17  -5 -14 5181.89 992.950   2
  17   5 -12 1939.31 530.387   1
  17  -5 -12 1702.62 586.636   2
  17   5 -10 820.664 375.672   1
  17   5  -8 2492.71 628.088   1
  17   5  -6 792.858 418.755   1
  17   5  -4 1099.04 481.587   1
  17   5  -2 360.055 431.733   1
  17   5   0 1838.61 605.575   1
  17   5   2 1311.81 628.182   1
  17   5   4 368.658 339.469   1
  17  -6 -17 1001.43 505.001   2
  17  -6 -15-550.929 388.462   2
  17  -6 -13 4792.91 976.857   2
  17   6 -11 8890.37 1098.02   1
  17  -6 -11 9890.80 1346.58   2
  17   6  -9 6745.65 1009.03   1
  17   6  -7 4540.93 866.913   1
  17   6  -5 3515.31 760.579   1
  17   6  -3 6730.04 1089.96   1
  17   6  -1 4796.11 935.204   1
  17   6   1 2094.66 671.954   1
  17   6   3 2568.96 751.298   1
  17  -7 -16 620.763 429.574   2
  17  -7 -14-1216.41 544.799   2
  17  -7 -12 894.563 493.983   2
  17   7 -10 294.929 300.727   1
  17   7  -8-420.582 326.462   1
  17   7  -6-49.4654 237.405   1
  17   7  -4-306.082 337.580   1
  17   7  -2-492.583 389.811   1
  17   7   0 846.835 492.589   1
  17   7   2 162.103 323.134   1
  17  -8 -15 1390.72 583.200   2
  17  -8 -13 1104.86 559.627   2
  17  -8 -11 2842.39 799.492   2
  17   8  -9 1075.97 495.448   1
  17   8  -7 281.401 362.977   1
  17   8  -5-936.220 480.960   1
  17   8  -3 373.779 340.139   1
  17   8  -1 616.488 457.184   1
  17  -9 -14 2979.16 813.976   2
  17  -9 -12-816.711 480.106   2
  17   9 -10-202.904 300.870   1
  17   9  -8 606.941 417.200   1
  17   9  -6-142.541 282.811   1
  17   9  -4 958.356 475.263   1
  17   9  -2 252.617 375.262   1
  17 -10 -11 2789.17 801.993   2
  17  10  -9 3255.57 748.083   1
  17  10  -7 11971.7 1467.63   1
  17  10  -5 7358.12 1182.85   1
  17  11  -8 3900.84 832.360   1
  18   0 -20 629.014 546.580   2
  18   0 -18 3132.34 768.564   2
  18   0 -16 4120.66 824.901   2
  18   0 -14-360.678 304.927   2
  18   0 -12 3837.36 796.837   2
  18   0 -12 3877.18 723.511   1
  18   0 -10 45282.8 2568.20   1
  18   0  -8 20646.4 1736.70   1
  18   0  -6 3622.79 771.998   1
  18   0  -4 17043.0 1639.75   1
  18   0  -2 8135.75 1164.75   1
  18   0   0 7133.14 1116.82   1
  18   0   2 14727.5 1629.67   1
  18   0   4 4562.73 948.028   1
  18   1 -19 4806.47 959.056   2
  18  -1 -19 5034.43 1014.57   2
  18   1 -17 7709.42 1151.98   2
  18  -1 -17 7735.44 1176.62   2
  18   1 -15 1808.67 561.199   2
  18  -1 -15 2086.26 645.014   2
  18   1 -13 8917.29 1146.37   2
  18  -1 -13 9136.22 1207.50   2
  18   1 -13 8126.44 1027.67   1
  18   1 -11 8373.49 1086.90   1
  18   1 -11 7542.21 1036.06   2
  18  -1 -11 7614.32 1112.25   2
  18  -1  -9 2129.41 602.042   1
  18   1  -9 2012.93 599.079   1
  18  -1  -7 3082.62 720.817   1
  18   1  -7 2655.97 690.218   1
  18  -1  -5 1521.49 485.996   1
  18   1  -5 2547.17 640.942   1
  18  -1  -3 419.136 380.814   1
  18   1  -3 485.561 352.934   1
  18  -1  -1 389.352 401.550   1
  18   1  -1 3.93443 289.681   1
  18  -1   1-264.487 358.029   1
  18   1   1-169.797 268.588   1
  18  -1   3 817.826 448.476   1
  18   1   3-10.3252 219.708   1
  18   2 -20 175.875 356.732   2
  18   2 -18-820.025 421.905   2
  18  -2 -18-213.691 411.021   2
  18   2 -16 3677.63 750.658   2
  18  -2 -16 2505.14 722.597   2
  18   2 -14 6080.04 928.665   2
  18  -2 -14 7278.01 1113.44   2
  18   2 -12 3341.00 663.676   1
  18   2 -12 2903.34 646.096   2
  18  -2 -12 2662.68 659.490   2
  18   2 -10 3799.94 727.419   1
  18   2 -10 4379.45 769.105   2
  18   2  -8 5114.54 873.009   1
  18  -2  -8 4303.28 815.328   1
  18  -2  -6 4108.69 823.727   1
  18   2  -6 4179.12 816.955   1
  18  -2  -4 9883.25 1271.92   1
  18   2  -4 9631.00 1255.22   1
  18  -2  -2 4873.07 930.640   1
  18   2  -2 5782.71 1024.34   1
  18  -2   0 4812.10 947.282   1
  18   2   0 4515.15 954.223   1
  18  -2   2 4849.13 952.139   1
  18   2   2 4702.56 938.571   1
  18  -2   4 1328.75 534.335   1
  18   2   4 1014.03 475.507   1
  18  -3 -19 427.828 418.405   2
  18   3 -17 1204.38 475.690   2
  18  -3 -17 1113.52 494.270   2
  18   3 -15 1204.80 452.233   2
  18  -3 -15 664.285 434.678   2
  18   3 -13 281.010 248.078   2
  18  -3 -13 166.181 234.467   2
  18   3 -11 71.4915 214.473   1
  18   3 -11 339.669 257.902   2
  18   3  -9 611.235 362.058   1
  18   3  -9 283.439 248.560   2
  18   3  -7 1579.69 554.698   1
  18   3  -5 304.934 284.219   1
  18   3  -3-270.942 344.420   1
  18  -3  -3-547.917 378.744   1
  18  -3  -1 66.8470 311.273   1
  18   3  -1 322.724 379.050   1
  18  -3   1-428.333 362.721   1
  18   3   1-385.664 343.483   1
  18   3   3-48.8789 249.277   1
  18  -3   3-6.05042 260.243   1
  18  -4 -18-94.4522 264.548   2
  18  -4 -16-618.359 398.535   2
  18  -4 -14-467.332 379.280   2
  18   4 -12 725.977 354.110   1
  18  -4 -12-121.799 347.149   2
  18   4 -10 263.387 263.897   1
  18   4  -8 903.766 469.252   1
  18   4  -6 167.645 328.268   1
  18   4  -4 1290.04 542.936   1
  18   4  -2 308.962 217.118   1
  18   4   0-0.84266 271.021   1
  18   4   2-26.7445 257.633   1
  18  -5 -17 3971.77 914.325   2
  18  -5 -15 2616.53 783.711   2
  18  -5 -13 2516.09 772.404   2
  18   5 -11 723.362 340.815   1
  18   5  -9 331.918 317.075   1
  18   5  -7 607.498 351.707   1
  18   5  -5 4011.10 849.413   1
  18   5  -3-461.856 357.503   1
  18   5  -1 422.029 318.841   1
  18   5   1 264.752 284.549   1
  18  -6 -16 6877.68 1193.08   2
  18  -6 -14 2216.16 695.000   2
  18  -6 -12 1886.78 665.258   2
  18   6 -10 6037.90 968.777   1
  18   6  -8 3631.63 802.270   1
  18   6  -6 3607.99 810.898   1
  18   6  -4 11907.2 1452.84   1
  18   6  -2 10034.1 1359.71   1
  18   6   0 2292.25 699.082   1
  18  -7 -15 1056.71 545.625   2
  18  -7 -13 8762.77 1347.05   2
  18   7 -11 14615.3 1483.92   1
  18  -7 -11 18793.6 1940.26   2
  18   7  -9 566.755 352.552   1
  18   7  -7-112.267 282.841   1
  18   7  -5 1769.73 592.358   1
  18   7  -3 130.079 383.080   1
  18   7  -1 939.210 507.578   1
  18  -8 -14 1938.57 667.042   2
  18  -8 -12 4422.48 994.148   2
  18   8 -10 7000.46 1077.72   1
  18   8  -8 3957.69 826.314   1
  18   8  -6 8190.70 1212.77   1
  18   8  -4 13079.0 1594.95   1
  18   8  -2 8488.13 1349.09   1
  18  -9 -11 1427.16 652.430   2
  18   9  -9 668.463 397.557   1
  18   9  -7 2473.38 724.547   1
  18   9  -5 2066.23 694.318   1
  18  10  -8 2494.90 703.952   1
  19   0 -19-119.387 295.241   2
  19   0 -17 148.564 273.929   2
  19   0 -15 199.517 272.236   2
  19   0 -13-353.676 312.567   2
  19   0 -11 88.8888 277.107   1
  19   0 -11 282.435 189.849   2
  19   0  -9 10.7236 281.103   1
  19   0  -7 158.382 273.886   1
  19   0  -5 354.840 302.823   1
  19   0  -3-180.953 284.337   1
  19   0  -1-6.74884 274.723   1
  19   0   1 613.209 410.275   1
  19   1 -20 1495.35 592.552   2
  19   1 -18-458.650 435.482   2
  19  -1 -18 303.302 280.578   2
  19   1 -16 1227.61 474.435   2
  19  -1 -16-571.419 392.965   2
  19   1 -14 1707.29 592.181   2
  19  -1 -14 1428.97 534.276   2
  19   1 -12 1072.81 457.111   1
  19   1 -12 683.543 352.868   2
  19  -1 -12 1267.67 530.056   2
  19   1 -10 1220.45 463.695   1
  19  -1 -10 1659.27 538.697   1
  19  -1  -8 4098.27 841.875   1
  19   1  -8 3532.61 770.136   1
  19  -1  -6-64.5594 250.548   1
  19   1  -6 91.2838 251.967   1
  19  -1  -4-372.795 388.996   1
  19   1  -4 147.926 298.407   1
  19  -1  -2 1141.56 499.036   1
  19   1  -2 541.769 390.616   1
  19  -1   0-418.715 378.793   1
  19   1   0 1731.79 597.988   1
  19  -1   2-856.203 460.060   1
  19   1   2-53.8425 246.098   1
  19   2 -19 570.704 374.460   2
  19   2 -17-130.976 274.739   2
  19  -2 -17 505.637 330.237   2
  19   2 -15 545.399 260.552   2
  19  -2 -15-385.946 345.834   2
  19   2 -13 4006.19 766.645   1
  19   2 -13 4651.29 840.415   2
  19  -2 -13 4556.08 949.651   2
  19   2 -11 1751.22 544.857   1
  19   2 -11 1061.22 415.756   2
  19   2  -9 4429.68 853.036   1
  19   2  -7 6870.55 1091.85   1
  19  -2  -7 8231.50 1175.87   1
  19  -2  -5 2668.10 718.243   1
  19   2  -5 3568.88 796.483   1
  19  -2  -3 2607.40 706.795   1
  19   2  -3 2553.36 698.213   1
  19  -2  -1 4080.56 927.177   1
  19   2  -1 3006.67 769.149   1
  19  -2   1 4565.27 948.904   1
  19   2   1 4088.77 898.264   1
  19  -3 -18 3156.50 799.760   2
  19  -3 -16 14675.9 1707.87   2
  19  -3 -14 14097.9 1621.21   2
  19   3 -12 956.275 400.881   1
  19  -3 -12 1258.96 572.963   2
  19   3 -10 1151.43 456.208   1
  19   3  -8 9732.94 1277.60   1
  19   3  -6 5381.64 980.124   1
  19   3  -4 2139.15 645.678   1
  19   3  -2 2659.89 727.152   1
  19  -3  -2 3684.14 840.195   1
  19   3   0-499.039 380.202   1
  19  -3   0-803.110 455.336   1
  19  -4 -17 349.096 346.597   2
  19  -4 -15-257.501 331.546   2
  19  -4 -13 7046.62 1176.41   2
  19   4 -11 3923.00 768.914   1
  19   4  -9 3308.91 763.190   1
  19   4  -7 9087.31 1232.75   1
  19   4  -5 12843.5 1506.49   1
  19   4  -3 9325.66 1316.89   1
  19   4  -1 5696.28 1061.35   1
  19  -5 -16 4196.82 966.966   2
  19  -5 -14 3188.31 853.582   2
  19   5 -12 2507.07 622.262   1
  19  -5 -12 2457.93 707.471   2
  19   5 -10 4982.77 909.336   1
  19   5  -8 4725.37 893.228   1
  19   5  -6 947.583 465.361   1
  19   5  -4 1342.17 565.194   1
  19   5  -2 2076.99 675.647   1
  19  -6 -15-412.681 380.582   2
  19  -6 -13 411.318 418.954   2
  19   6 -11 1191.09 463.955   1
  19   6  -9 2335.46 639.086   1
  19   6  -7 3488.27 782.082   1
  19   6  -5 3124.81 786.829   1
  19   6  -3 1459.51 559.847   1
  19  -7 -12 652.338 433.432   2
  19   7 -10 20.7183 206.915   1
  19   7  -8-61.4131 286.689   1
  19   7  -6-139.930 311.574   1
  19   7  -4-561.185 414.951   1
  19  -8 -11-322.164 367.621   2
  19   8  -9 521.865 419.456   1
  19   8  -7 2183.48 701.463   1
  19   8  -5 191.928 318.164   1
  19   9 -10 2345.88 662.231   1
  19   9  -8 2209.15 704.706   1
  20   0 -18 598.650 426.770   2
  20   0 -16 4545.62 935.181   2
  20   0 -14-12.5806 199.188   2
  20   0 -12-77.4086 221.736   2
  20   0 -12 822.356 411.593   1
  20   0 -10 2047.15 670.194   1
  20   0  -8 4139.15 868.087   1
  20   0  -6 3627.30 814.451   1
  20   0  -4 6925.00 1120.99   1
  20   0  -2 7832.42 1251.59   1
  20   1 -19 4089.37 916.046   2
  20   1 -17 6636.71 1082.99   2
  20  -1 -17 6312.77 1107.03   2
  20   1 -15 1953.69 610.524   2
  20  -1 -15 2906.67 740.186   2
  20   1 -13 5707.72 944.166   1
  20   1 -13 6392.63 1039.97   2
  20  -1 -13 6360.87 1063.52   2
  20   1 -11 13973.8 1503.66   1
  20   1 -11 14442.2 1532.72   2
  20  -1 -11 16795.5 1707.11   2
  20  -1  -9 2489.12 663.272   1
  20   1  -9 2916.63 713.407   1
  20  -1  -7 2699.20 743.490   1
  20   1  -7 1568.46 556.427   1
  20  -1  -5 4498.58 912.289   1
  20   1  -5 4669.86 921.727   1
  20  -1  -3 1433.99 596.738   1
  20   1  -3 1287.58 505.008   1
  20  -1  -1 1558.57 600.475   1
  20   1  -1 2731.29 750.006   1
  20   2 -18 464.388 378.644   2
  20   2 -16 580.297 349.592   2
  20  -2 -16 474.341 383.766   2
  20   2 -14 453.033 332.957   2
  20  -2 -14 734.860 433.826   2
  20   2 -12 4372.83 821.714   1
  20   2 -12 4371.33 804.718   2
  20  -2 -12 4899.29 984.295   2
  20   2 -10 2114.74 602.243   1
  20   2 -10 1958.64 568.128   2
  20   2  -8 657.313 393.270   1
  20  -2  -6 488.789 354.541   1
  20   2  -6 1470.12 597.473   1
  20  -2  -4 5053.75 987.616   1
  20   2  -4 6173.97 1086.00   1
  20  -2  -2 2824.56 776.518   1
  20   2  -2 2264.87 688.076   1
  20  -3 -15 1575.61 584.317   2
  20  -3 -13 905.925 472.476   2
  20   3 -11 237.652 277.643   1
  20   3  -9 760.843 420.761   1
  20   3  -7 958.764 472.945   1
  20   3  -5 523.511 398.024   1
  20   3  -3 1221.51 538.543   1
  20  -4 -14 150.764 311.922   2
  20   4 -12 64.4107 234.026   1
  20  -4 -12 823.359 462.116   2
  20   4 -10-511.277 379.155   1
  20   4  -8 17.7663 266.500   1
  20   4  -6 276.275 338.975   1
  20   4  -4 736.353 455.950   1
  20   4  -2-80.8383 310.086   1
  20  -5 -13 2482.18 747.089   2
  20   5 -11 409.913 318.865   1
  20   5  -9-80.3158 268.675   1
  20   5  -7 1515.59 596.071   1
  20   5  -5 353.021 382.960   1
  20   5  -3-323.140 354.264   1
  20  -6 -12 94.0648 344.351   2
  20   6 -10 3323.00 780.570   1
  20   6  -8 1500.79 589.463   1
  20   6  -6 1340.03 515.379   1
  20   7 -11 9363.21 1274.29   1
  20   7  -9 6599.77 1101.11   1
  20   7  -7 2738.00 730.251   1
  20   8 -10 2291.89 655.564   1
  21   0 -17-26.3663 212.098   2
  21   0 -15-140.398 233.210   2
  21   0 -13-141.913 242.011   2
  21   0 -11-93.5244 234.794   1
  21   0 -11-259.754 325.069   2
  21   0  -9 337.999 320.290   1
  21   0  -7-396.747 348.543   1
  21   0  -5 129.394 330.100   1
  21   1 -16 568.460 367.065   2
  21  -1 -16 148.059 252.155   2
  21   1 -14-254.540 261.852   2
  21  -1 -14-569.699 370.793   2
  21   1 -12 894.177 439.856   1
  21   1 -12 1164.60 495.959   2
  21  -1 -12 2028.04 647.709   2
  21   1 -10 2502.34 691.179   1
  21  -1  -8 2107.63 660.014   1
  21   1  -8 1266.24 543.600   1
  21  -1  -6 625.157 422.165   1
  21   1  -6 892.538 475.252   1
  21  -1  -4 694.575 413.505   1
  21   1  -4 1095.21 505.021   1
  21  -2 -15 139.346 257.549   2
  21  -2 -13 1918.15 722.031   2
  21   2 -11-305.294 322.627   1
  21   2  -9 542.490 371.768   1
  21   2  -7 2230.56 730.418   1
  21   2  -5 720.980 422.126   1
  21  -2  -5 957.428 491.198   1
  21  -3 -14 8715.47 1328.90   2
  21   3 -12 3503.89 787.968   1
  21  -3 -12 5098.78 1030.51   2
  21   3 -10 4105.58 851.085   1
  21   3  -8 5589.37 1045.22   1
  21   3  -6 2084.51 677.676   1
  21  -4 -13 955.434 470.917   2
  21   4 -11 168.001 253.153   1
  21   4  -9 1714.56 589.579   1
  21   4  -7 4380.08 932.339   1
  21   5 -10 3178.52 764.094   1
  21   5  -8 3936.90 871.498   1
  21   6 -11-161.477 283.346   1
  21   6  -9 292.315 346.460   1
  21   7 -10 365.583 341.767   1
  22   0 -14-330.716 320.288   2
  22   0 -12 1332.99 520.336   2
  22   0 -10 124.578 280.734   1
  22   0  -8 156.762 278.655   1
  22   1 -15 4143.29 867.003   2
  22   1 -13 2579.79 703.436   2
  22  -1 -13 3995.16 892.329   2
  22   1 -13 2138.47 613.673   1
  22   1 -11 5634.44 1023.75   1
  22   1 -11 3830.17 819.465   2
  22  -1 -11 5179.16 1016.33   2
  22   1  -9 4210.50 945.170   1
  22  -1  -9 2248.44 696.157   1
  22   2 -12-25.1782 216.959   1
  22  -2 -12 736.906 485.692   2
  22   2 -10 256.823 485.953   1
  22   2  -8 751.587 434.771   1
  22   3 -11 838.303 446.084   1
  22   3  -9-199.290 318.556   1
  22   4 -12-435.568 319.043   1
  22   4 -10-395.027 339.958   1
  22   5 -11 1734.67 556.930   1
   0   0   0    0.00    0.00   0
TITL exp_133 in I2/a
REM I2/a (#15 in standard setting)
CELL 0.71073  15.427415  11.461500  15.730636  90.0000 115.7341  90.0000
ZERR    7.00   0.002170   0.000560   0.001671   0.0000   0.0153   0.0000
LATT  2
SYMM -x+1/2, y,-z
SFAC C H N O S Cd
UNIT 70.00 70.00 28.00 14.00 14.00 7.00
TREF
HKLF 4
END
;
_shelx_hkl_checksum   93295
