# Supplementary material
Source: MDPI journal article supplement (https://www.mdpi.com/2073-4352/11/6/697)
Supplement: s1 [file s1 › 2.cif]

 
data_2
 
_audit_creation_method            'SHELXL-2018/3'
_shelx_SHELXL_version_number      '2018/3'
_chemical_name_systematic         ?
_chemical_name_common             ?
_chemical_melting_point           ?
_chemical_formula_moiety          ?
_chemical_formula_sum
 'C8 H7 Cd N5 O S2' 
_chemical_formula_weight          365.71

loop_
 _atom_type_symbol
 _atom_type_description
 _atom_type_scat_dispersion_real
 _atom_type_scat_dispersion_imag
 _atom_type_scat_source
 'C'  'C'   0.0033   0.0016
 'International Tables Vol C Tables 4.2.6.8 and 6.1.1.4'
 'H'  'H'   0.0000   0.0000
 'International Tables Vol C Tables 4.2.6.8 and 6.1.1.4'
 'Cd'  'Cd'  -0.8075   1.2024
 'International Tables Vol C Tables 4.2.6.8 and 6.1.1.4'
 'N'  'N'   0.0061   0.0033
 'International Tables Vol C Tables 4.2.6.8 and 6.1.1.4'
 'O'  'O'   0.0106   0.0060
 'International Tables Vol C Tables 4.2.6.8 and 6.1.1.4'
 'S'  'S'   0.1246   0.1234
 'International Tables Vol C Tables 4.2.6.8 and 6.1.1.4'
 
_space_group_crystal_system       monoclinic
_space_group_IT_number            14
_space_group_name_H-M_alt         'P 21/c'
_space_group_name_Hall            '-P 2ybc'
 
_shelx_space_group_comment
;
The symmetry employed for this shelxl refinement is uniquely defined
by the following loop, which should always be used as a source of
symmetry information in preference to the above space-group names.
They are only intended as comments.
;
 
loop_
 _space_group_symop_operation_xyz
 'x, y, z'
 '-x, y+1/2, -z+1/2'
 '-x, -y, -z'
 'x, -y-1/2, z-1/2'
 
_cell_length_a                    10.3369(5)
_cell_length_b                    9.5051(5)
_cell_length_c                    12.2558(6)
_cell_angle_alpha                 90
_cell_angle_beta                  90.203(4)
_cell_angle_gamma                 90
_cell_volume                      1204.17(10)
_cell_formula_units_Z             4
_cell_measurement_temperature     296(2)
_cell_measurement_reflns_used     3751
_cell_measurement_theta_min       4.5180
_cell_measurement_theta_max       32.0740
 
_exptl_crystal_description        'plate'
_exptl_crystal_colour             'colourless'
_exptl_crystal_density_meas       ?
_exptl_crystal_density_method     ?
_exptl_crystal_density_diffrn     2.017          
_exptl_crystal_F_000              712
_exptl_transmission_factor_min    ?
_exptl_transmission_factor_max    ?
_exptl_crystal_size_max           0.38
_exptl_crystal_size_mid           0.23
_exptl_crystal_size_min           0.05
_exptl_absorpt_coefficient_mu     2.149
_shelx_estimated_absorpt_T_min    ?
_shelx_estimated_absorpt_T_max    ?
_exptl_absorpt_correction_type    'multi-scan'
_exptl_absorpt_correction_T_min   0.60414
_exptl_absorpt_correction_T_max   1.00000
_exptl_absorpt_process_details    
;
CrysAlisPro, Agilent Technologies,
Version 1.171.37.35 (release 13-08-2014 CrysAlis171 .NET)
(compiled Aug 13 2014,18:06:01)
Empirical absorption correction using spherical harmonics,
 implemented in SCALE3 ABSPACK scaling algorithm.
;
_exptl_absorpt_special_details    ?
_diffrn_ambient_temperature       296(2)
_diffrn_radiation_wavelength      0.71073
_diffrn_radiation_type            MoK\a
_diffrn_source                    ?
_diffrn_measurement_device_type   
'Oxford Diffraction Xcalibur2 diffractometer with Sapphire 3 CCD detector'
_diffrn_measurement_method         '\w-scans'
_diffrn_detector_area_resol_mean  ?
_diffrn_reflns_number             8319
_diffrn_reflns_av_unetI/netI      0.0240
_diffrn_reflns_av_R_equivalents   0.0288
_diffrn_reflns_limit_h_min        -12
_diffrn_reflns_limit_h_max        10
_diffrn_reflns_limit_k_min        -10
_diffrn_reflns_limit_k_max        11
_diffrn_reflns_limit_l_min        -14
_diffrn_reflns_limit_l_max        14
_diffrn_reflns_theta_min          4.416
_diffrn_reflns_theta_max          24.996
_diffrn_reflns_theta_full         24.996
_diffrn_measured_fraction_theta_max   0.992
_diffrn_measured_fraction_theta_full  0.992
_diffrn_reflns_Laue_measured_fraction_max    0.992
_diffrn_reflns_Laue_measured_fraction_full   0.992
_diffrn_reflns_point_group_measured_fraction_max   0.992
_diffrn_reflns_point_group_measured_fraction_full  0.992
_reflns_number_total              2111
_reflns_number_gt                 1932
_reflns_threshold_expression      'I > 2\s(I)'
_reflns_Friedel_coverage          0.000
_reflns_Friedel_fraction_max      .
_reflns_Friedel_fraction_full     .
 
_reflns_special_details
;
 Reflections were merged by SHELXL according to the crystal
 class for the calculation of statistics and refinement.
 
 _reflns_Friedel_fraction is defined as the number of unique
 Friedel pairs measured divided by the number that would be
 possible theoretically, ignoring centric projections and
 systematic absences.
;
 
_computing_data_collection        
;
CrysAlisPro, Agilent Technologies,
Version 1.171.37.35 (release 13-08-2014 CrysAlis171 .NET)
(compiled Aug 13 2014,18:06:01)
;
_computing_cell_refinement        
;
CrysAlisPro, Agilent Technologies,
Version 1.171.37.35 (release 13-08-2014 CrysAlis171 .NET)
(compiled Aug 13 2014,18:06:01)
;
_computing_data_reduction         
;
CrysAlisPro, Agilent Technologies,
Version 1.171.37.35 (release 13-08-2014 CrysAlis171 .NET)
(compiled Aug 13 2014,18:06:01)
;
_computing_structure_solution   'SHELXT (Sheldrick, 2015)'
_computing_structure_refinement 'SHELXL-2018/3 (Sheldrick, 2018)'
_computing_molecular_graphics   'MERCURY, Version 2020.2.0 (Macrae et al., 2020)'
_computing_publication_material 'SHELXL-2018/3 (Sheldrick, 2018)'
_refine_special_details           ?
_refine_ls_structure_factor_coef  Fsqd
_refine_ls_matrix_type            full
_refine_ls_weighting_scheme       calc
_refine_ls_weighting_details
'w=1/[\s^2^(Fo^2^)+(0.0222P)^2^+0.5420P] where P=(Fo^2^+2Fc^2^)/3'
_atom_sites_solution_primary      ?
_atom_sites_solution_secondary    ?
_atom_sites_solution_hydrogens    mixed
_refine_ls_hydrogen_treatment     mixed
_refine_ls_extinction_method      none
_refine_ls_extinction_coef        .
_refine_ls_number_reflns          2111
_refine_ls_number_parameters      163
_refine_ls_number_restraints      3
_refine_ls_R_factor_all           0.0264
_refine_ls_R_factor_gt            0.0225
_refine_ls_wR_factor_ref          0.0500
_refine_ls_wR_factor_gt           0.0487
_refine_ls_goodness_of_fit_ref    1.064
_refine_ls_restrained_S_all       1.064
_refine_ls_shift/su_max           0.001
_refine_ls_shift/su_mean          0.000
 
loop_
 _atom_site_label
 _atom_site_type_symbol
 _atom_site_fract_x
 _atom_site_fract_y
 _atom_site_fract_z
 _atom_site_U_iso_or_equiv
 _atom_site_adp_type
 _atom_site_occupancy
 _atom_site_site_symmetry_order  
 _atom_site_calc_flag
 _atom_site_refinement_flags_posn
 _atom_site_refinement_flags_adp
 _atom_site_refinement_flags_occupancy
 _atom_site_disorder_assembly
 _atom_site_disorder_group
Cd1 Cd 0.74973(2) 0.84309(2) 0.40198(2) 0.02725(8) Uani 1 1 d . . . . .
N1 N 1.0546(3) 0.7353(3) 0.6435(2) 0.0445(7) Uani 1 1 d . . . . .
N2 N 0.7486(3) 0.6807(3) 0.2440(2) 0.0415(7) Uani 1 1 d . . . . .
N3 N 0.5501(2) 0.7448(2) 0.44555(18) 0.0290(5) Uani 1 1 d . . . . .
N4 N 0.1747(2) 0.5301(3) 0.29772(18) 0.0302(5) Uani 1 1 d D . . . .
H41 H 0.124(2) 0.570(3) 0.342(2) 0.036 Uiso 1 1 d D U . . .
N5 N 0.1067(2) 0.4692(2) 0.21045(19) 0.0291(5) Uani 1 1 d D . . . .
H51 H 0.063(3) 0.531(2) 0.176(2) 0.035 Uiso 1 1 d D U . . .
H52 H 0.054(2) 0.412(3) 0.239(2) 0.035 Uiso 1 1 d D U . . .
O1 O 0.36834(19) 0.4895(2) 0.21855(16) 0.0384(5) Uani 1 1 d . . . . .
S1 S 0.93103(8) 0.66062(8) 0.44628(6) 0.03585(18) Uani 1 1 d . . . . .
S2 S 0.77639(9) 0.48782(8) 0.07276(6) 0.0416(2) Uani 1 1 d . . . . .
C1 C 1.0006(3) 0.7082(3) 0.5618(3) 0.0326(7) Uani 1 1 d . . . . .
C2 C 0.7612(3) 0.6021(3) 0.1733(2) 0.0309(6) Uani 1 1 d . . . . .
C3 C 0.4848(3) 0.6742(3) 0.3692(2) 0.0294(6) Uani 1 1 d . . . . .
H3 H 0.520634 0.667576 0.299915 0.035 Uiso 1 1 calc R U . . .
C4 C 0.3669(3) 0.6105(3) 0.3876(2) 0.0256(6) Uani 1 1 d . . . . .
C5 C 0.3154(3) 0.6168(3) 0.4914(2) 0.0335(7) Uani 1 1 d . . . . .
H5 H 0.237530 0.572559 0.507363 0.040 Uiso 1 1 calc R U . . .
C6 C 0.3820(3) 0.6900(3) 0.5710(2) 0.0418(8) Uani 1 1 d . . . . .
H6 H 0.349275 0.696677 0.641380 0.050 Uiso 1 1 calc R U . . .
C7 C 0.4975(3) 0.7531(3) 0.5444(2) 0.0382(7) Uani 1 1 d . . . . .
H7 H 0.540840 0.803994 0.598076 0.046 Uiso 1 1 calc R U . . .
C8 C 0.3033(3) 0.5378(3) 0.2944(2) 0.0261(6) Uani 1 1 d . . . . .
 
loop_
 _atom_site_aniso_label
 _atom_site_aniso_U_11
 _atom_site_aniso_U_22
 _atom_site_aniso_U_33
 _atom_site_aniso_U_23
 _atom_site_aniso_U_13
 _atom_site_aniso_U_12
Cd1 0.02408(13) 0.03405(13) 0.02361(12) 0.00421(8) -0.00174(8) -0.00087(9)
N1 0.0457(17) 0.0496(17) 0.0382(16) -0.0076(12) -0.0043(13) -0.0034(13)
N2 0.0317(15) 0.0592(18) 0.0336(14) -0.0141(13) 0.0000(12) -0.0051(12)
N3 0.0245(13) 0.0368(13) 0.0259(12) -0.0027(9) 0.0001(10) -0.0044(10)
N4 0.0221(13) 0.0407(14) 0.0278(13) -0.0109(10) 0.0009(10) 0.0012(10)
N5 0.0246(13) 0.0331(14) 0.0294(13) -0.0020(10) -0.0041(10) -0.0007(10)
O1 0.0264(11) 0.0566(13) 0.0323(11) -0.0197(9) 0.0073(9) -0.0081(10)
S1 0.0371(4) 0.0351(4) 0.0353(4) -0.0023(3) -0.0032(3) 0.0091(3)
S2 0.0641(6) 0.0305(4) 0.0301(4) -0.0017(3) -0.0015(4) 0.0034(4)
C1 0.0290(16) 0.0260(15) 0.0428(18) 0.0027(12) 0.0081(14) 0.0046(12)
C2 0.0264(16) 0.0381(16) 0.0282(16) 0.0037(13) -0.0030(12) -0.0014(12)
C3 0.0258(15) 0.0387(16) 0.0236(14) -0.0025(11) 0.0009(12) -0.0044(12)
C4 0.0262(15) 0.0251(14) 0.0255(14) -0.0026(10) 0.0000(11) 0.0001(11)
C5 0.0282(16) 0.0406(16) 0.0317(16) -0.0026(12) 0.0061(13) -0.0088(13)
C6 0.0424(19) 0.059(2) 0.0236(15) -0.0107(14) 0.0091(14) -0.0127(16)
C7 0.0364(18) 0.0521(19) 0.0262(16) -0.0089(13) -0.0008(14) -0.0126(15)
C8 0.0278(15) 0.0274(14) 0.0230(14) 0.0001(11) -0.0006(12) -0.0035(12)
 
_geom_special_details
;
 All esds (except the esd in the dihedral angle between two l.s. planes)
 are estimated using the full covariance matrix.  The cell esds are taken
 into account individually in the estimation of esds in distances, angles
 and torsion angles; correlations between esds in cell parameters are only
 used when they are defined by crystal symmetry.  An approximate (isotropic)
 treatment of cell esds is used for estimating esds involving l.s. planes.
;
 
loop_
 _geom_bond_atom_site_label_1
 _geom_bond_atom_site_label_2
 _geom_bond_distance
 _geom_bond_site_symmetry_2
 _geom_bond_publ_flag
Cd1 N3 2.329(2) . ?
Cd1 N5 2.356(2) 2_655 ?
Cd1 O1 2.3653(19) 2_655 ?
Cd1 N2 2.476(3) . ?
Cd1 S1 2.6092(8) . ?
Cd1 S2 2.6525(8) 4_576 ?
N1 C1 1.173(4) . ?
N2 C2 1.152(4) . ?
N3 C7 1.333(4) . ?
N3 C3 1.333(3) . ?
N4 C8 1.332(4) . ?
N4 N5 1.403(3) . ?
N4 H41 0.851(10) . ?
N5 H51 0.854(10) . ?
N5 H52 0.851(10) . ?
O1 C8 1.238(3) . ?
S1 C1 1.649(3) . ?
S2 C2 1.650(3) . ?
C3 C4 1.380(4) . ?
C3 H3 0.9300 . ?
C4 C5 1.383(4) . ?
C4 C8 1.486(4) . ?
C5 C6 1.379(4) . ?
C5 H5 0.9300 . ?
C6 C7 1.376(4) . ?
C6 H6 0.9300 . ?
C7 H7 0.9300 . ?
 
loop_
 _geom_angle_atom_site_label_1
 _geom_angle_atom_site_label_2
 _geom_angle_atom_site_label_3
 _geom_angle
 _geom_angle_site_symmetry_1
 _geom_angle_site_symmetry_3
 _geom_angle_publ_flag
N3 Cd1 N5 153.96(8) . 2_655 ?
N3 Cd1 O1 85.61(8) . 2_655 ?
N5 Cd1 O1 70.14(7) 2_655 2_655 ?
N3 Cd1 N2 85.84(8) . . ?
N5 Cd1 N2 82.02(9) 2_655 . ?
O1 Cd1 N2 82.95(8) 2_655 . ?
N3 Cd1 S1 108.79(6) . . ?
N5 Cd1 S1 90.37(6) 2_655 . ?
O1 Cd1 S1 152.83(5) 2_655 . ?
N2 Cd1 S1 75.51(7) . . ?
N3 Cd1 S2 98.72(6) . 4_576 ?
N5 Cd1 S2 95.13(6) 2_655 4_576 ?
O1 Cd1 S2 100.85(6) 2_655 4_576 ?
N2 Cd1 S2 174.22(7) . 4_576 ?
S1 Cd1 S2 99.56(3) . 4_576 ?
C2 N2 Cd1 172.9(2) . . ?
C7 N3 C3 117.4(2) . . ?
C7 N3 Cd1 123.36(19) . . ?
C3 N3 Cd1 119.19(18) . . ?
C8 N4 N5 119.8(2) . . ?
C8 N4 H41 128(2) . . ?
N5 N4 H41 111(2) . . ?
N4 N5 Cd1 109.93(16) . 2_645 ?
N4 N5 H51 111(2) . . ?
Cd1 N5 H51 113(2) 2_645 . ?
N4 N5 H52 106(2) . . ?
Cd1 N5 H52 109(2) 2_645 . ?
H51 N5 H52 108(3) . . ?
C8 O1 Cd1 114.02(17) . 2_645 ?
C1 S1 Cd1 107.89(10) . . ?
C2 S2 Cd1 100.40(10) . 4_575 ?
N1 C1 S1 176.1(3) . . ?
N2 C2 S2 178.8(3) . . ?
N3 C3 C4 123.5(3) . . ?
N3 C3 H3 118.3 . . ?
C4 C3 H3 118.3 . . ?
C3 C4 C5 118.3(3) . . ?
C3 C4 C8 117.9(2) . . ?
C5 C4 C8 123.8(3) . . ?
C6 C5 C4 118.7(3) . . ?
C6 C5 H5 120.7 . . ?
C4 C5 H5 120.7 . . ?
C7 C6 C5 118.9(3) . . ?
C7 C6 H6 120.5 . . ?
C5 C6 H6 120.5 . . ?
N3 C7 C6 123.1(3) . . ?
N3 C7 H7 118.4 . . ?
C6 C7 H7 118.4 . . ?
O1 C8 N4 123.2(2) . . ?
O1 C8 C4 120.6(2) . . ?
N4 C8 C4 116.2(2) . . ?
 
loop_
 _geom_torsion_atom_site_label_1
 _geom_torsion_atom_site_label_2
 _geom_torsion_atom_site_label_3
 _geom_torsion_atom_site_label_4
 _geom_torsion
 _geom_torsion_site_symmetry_1
 _geom_torsion_site_symmetry_2
 _geom_torsion_site_symmetry_3
 _geom_torsion_site_symmetry_4
 _geom_torsion_publ_flag
C8 N4 N5 Cd1 14.5(3) . . . 2_645 ?
C7 N3 C3 C4 0.1(4) . . . . ?
Cd1 N3 C3 C4 179.0(2) . . . . ?
N3 C3 C4 C5 -1.9(4) . . . . ?
N3 C3 C4 C8 178.7(3) . . . . ?
C3 C4 C5 C6 2.0(4) . . . . ?
C8 C4 C5 C6 -178.6(3) . . . . ?
C4 C5 C6 C7 -0.5(5) . . . . ?
C3 N3 C7 C6 1.5(5) . . . . ?
Cd1 N3 C7 C6 -177.3(2) . . . . ?
C5 C6 C7 N3 -1.3(5) . . . . ?
Cd1 O1 C8 N4 -11.6(3) 2_645 . . . ?
Cd1 O1 C8 C4 169.15(18) 2_645 . . . ?
N5 N4 C8 O1 -2.4(4) . . . . ?
N5 N4 C8 C4 177.0(2) . . . . ?
C3 C4 C8 O1 26.6(4) . . . . ?
C5 C4 C8 O1 -152.8(3) . . . . ?
C3 C4 C8 N4 -152.7(3) . . . . ?
C5 C4 C8 N4 27.9(4) . . . . ?
 
loop_
 _geom_hbond_atom_site_label_D 
 _geom_hbond_atom_site_label_H 
 _geom_hbond_atom_site_label_A 
 _geom_hbond_distance_DH 
 _geom_hbond_distance_HA 
 _geom_hbond_distance_DA 
 _geom_hbond_angle_DHA 
 _geom_hbond_site_symmetry_A 
 _geom_hbond_publ_flag
N4 H41 S1  0.851(10) 2.519(13) 3.352(2) 166(3) 1_455 yes
N5 H51 N1  0.854(10) 2.26(2) 2.975(4) 142(3) 4_475 yes
N5 H52 N1  0.851(10) 2.299(13) 3.128(4) 165(3) 3_666 yes
C3 H3 N2  0.93 2.46 3.134(4) 129.5 . yes
 
_refine_diff_density_max    0.328
_refine_diff_density_min   -0.566
_refine_diff_density_rms    0.064

_shelx_res_file
;
TITL shelxt_a.res in P2(1)/c
    shelx.res
    created by SHELXL-2018/3 at 01:12:45 on 20-May-2021
CELL  0.71073  10.336907   9.505104  12.255816   90.000   90.2031   90.000
ZERR     4   0.000466   0.000513   0.000605    0.000    0.0040    0.000
LATT   1
SYMM  - X, 1/2 + Y, 1/2 - Z
SFAC  C    H    CD   N    O    S
UNIT  32 28 4 20 4 8
MERG   2
OMIT    -1.00  50.00
OMIT 3   2   4
OMIT 1   2   0
OMIT  4   1   0
OMIT -2   0   2
OMIT  1   1   2
OMIT -5   1   1
ACTA
CONF
FMAP   2
PLAN   20
BOND  $H
EQIV $5 x-1, y, z
HTAB N4 S1_$5
EQIV $6 x-1, -y+3/2, z-1/2
HTAB N5 N1_$6
EQIV $7 -x+1, -y+1, -z+1
HTAB N5 N1_$7
HTAB C3 N2
LIST   6
L.S.  10
TEMP    23
DFIX 0.86 0.01 N4 H41
DFIX 0.86 0.01 N5 H51
DFIX 0.86 0.01 N5 H52
WGHT    0.022200    0.542000
FVAR       4.45391
CD1   3    0.749731    0.843094    0.401975    11.00000    0.02408    0.03405 =
         0.02361    0.00421   -0.00174   -0.00087
N1    4    1.054607    0.735294    0.643509    11.00000    0.04572    0.04960 =
         0.03815   -0.00759   -0.00431   -0.00336
N2    4    0.748562    0.680704    0.244020    11.00000    0.03171    0.05918 =
         0.03362   -0.01414   -0.00003   -0.00513
N3    4    0.550105    0.744840    0.445554    11.00000    0.02449    0.03676 =
         0.02590   -0.00268    0.00012   -0.00438
N4    4    0.174741    0.530060    0.297717    11.00000    0.02210    0.04071 =
         0.02778   -0.01090    0.00090    0.00119
H41   2    0.123755    0.570442    0.342245    11.00000   -1.20000
N5    4    0.106735    0.469162    0.210446    11.00000    0.02463    0.03315 =
         0.02943   -0.00199   -0.00414   -0.00073
H51   2    0.062970    0.531043    0.175880    11.00000   -1.20000
H52   2    0.053696    0.411701    0.239191    11.00000   -1.20000
O1    5    0.368336    0.489475    0.218554    11.00000    0.02638    0.05656 =
         0.03234   -0.01973    0.00729   -0.00813
S1    6    0.931028    0.660620    0.446278    11.00000    0.03711    0.03506 =
         0.03534   -0.00233   -0.00317    0.00906
S2    6    0.776393    0.487816    0.072756    11.00000    0.06408    0.03051 =
         0.03012   -0.00173   -0.00153    0.00344
C1    1    1.000612    0.708181    0.561806    11.00000    0.02899    0.02600 =
         0.04276    0.00272    0.00806    0.00458
C2    1    0.761183    0.602072    0.173295    11.00000    0.02637    0.03814 =
         0.02819    0.00367   -0.00297   -0.00135
C3    1    0.484832    0.674247    0.369231    11.00000    0.02576    0.03871 =
         0.02361   -0.00248    0.00093   -0.00438
AFIX  43
H3    2    0.520634    0.667576    0.299915    11.00000   -1.20000
AFIX   0
C4    1    0.366923    0.610508    0.387579    11.00000    0.02622    0.02506 =
         0.02548   -0.00264   -0.00004    0.00008
C5    1    0.315450    0.616816    0.491442    11.00000    0.02816    0.04064 =
         0.03172   -0.00260    0.00614   -0.00883
AFIX  43
H5    2    0.237530    0.572559    0.507363    11.00000   -1.20000
AFIX   0
C6    1    0.381959    0.690047    0.570967    11.00000    0.04242    0.05929 =
         0.02364   -0.01066    0.00912   -0.01267
AFIX  43
H6    2    0.349275    0.696677    0.641380    11.00000   -1.20000
AFIX   0
C7    1    0.497454    0.753136    0.544437    11.00000    0.03636    0.05206 =
         0.02621   -0.00885   -0.00078   -0.01263
AFIX  43
H7    2    0.540840    0.803994    0.598076    11.00000   -1.20000
AFIX   0
C8    1    0.303292    0.537844    0.294401    11.00000    0.02780    0.02737 =
         0.02305    0.00010   -0.00062   -0.00346

HKLF    4


REM  shelxt_a.res in P2(1)/c
REM wR2 = 0.0500, GooF = S = 1.064, Restrained GooF = 1.064 for all data
REM R1 = 0.0225 for 1932 Fo > 4sig(Fo) and 0.0264 for all 2111 data
REM 163 parameters refined using 3 restraints

END

WGHT      0.0220      0.5659

REM Highest difference peak  0.328,  deepest hole -0.566,  1-sigma level  0.064
Q1    1   0.7988  0.7991  0.3343  11.00000  0.05    0.33
Q2    1   0.5805  0.8258  0.4259  11.00000  0.05    0.28
Q3    1   0.7614  0.7455  0.4023  11.00000  0.05    0.27
Q4    1   0.1233  0.3799  0.2144  11.00000  0.05    0.26
Q5    1   0.6860  0.7699  0.4639  11.00000  0.05    0.22
Q6    1   0.1814  0.4414  0.1539  11.00000  0.05    0.22
Q7    1   0.8804  0.6527  0.5194  11.00000  0.05    0.21
Q8    1   0.2582  0.7191  0.7533  11.00000  0.05    0.21
Q9    1   0.8106  0.5466 -0.0110  11.00000  0.05    0.21
Q10   1   0.3328  0.6444  0.4207  11.00000  0.05    0.21
Q11   1   0.4244  0.6195  0.3793  11.00000  0.05    0.21
Q12   1   0.7801  0.6253  0.4007  11.00000  0.05    0.20
Q13   1   1.0868  0.7752  0.5915  11.00000  0.05    0.20
Q14   1   0.6813  0.8585  0.4824  11.00000  0.05    0.20
Q15   1   0.3634  0.4463  0.2584  11.00000  0.05    0.20
Q16   1   0.9047  0.5481  0.4921  11.00000  0.05    0.19
Q17   1   0.6949  0.4917  0.0519  11.00000  0.05    0.19
Q18   1   0.5249  0.7289  0.4830  11.00000  0.05    0.18
Q19   1   0.3391  0.5567  0.3603  11.00000  0.05    0.18
Q20   1   0.2578  0.7597  0.6089  11.00000  0.05    0.18
;
_shelx_res_checksum   85295

_shelx_hkl_file
;
   0   0  -3 546.846 210.440   1
   0   0  -4 171120. 3606.56   1
   0   0  -5-344.826 276.876   1
   0   0   5 2.19980 279.128   6
   0   0  -6 556460. 10511.1   1
   0   0   6 560677. 10532.9   6
   0   0  -7 324.663 352.910   1
   0   0   7 714.889 356.828   6
   0   0  -8 28736.1 1462.71   1
   0   0   8 28586.6 1437.78   6
   0   0   9 497.392 562.197   6
   0   0  -9 861.533 519.934   1
   0   0 -10 62457.7 2490.45   1
   0   0  10 65160.4 2480.61   6
   0   0  11 545.625 547.052   6
   0   0 -11 512.494 571.468   1
   0   0 -12 2962.33 794.912   1
   0   0  12 3608.48 767.435   6
   0   0 -13 600.720 618.742   1
   0   0  13 273.977 549.363   6
   0   0  14 2465.86 761.664   6
   0   0  15 626.780 660.201   6
   0   0  16 6593.87 1081.27   6
   0   0  17 1066.70 839.106   6
   0   0  18 709.728 679.551   6
   0  -1  -3 41512.3 939.142   3
   0   1   3 41958.1 927.962   3
   0   1   3 42095.3 930.064   2
   0   1  -3 40616.0 941.329   3
   0  -1  -3 40934.8 1092.79   1
   0   1  -3 40849.7 930.223   2
   0  -1   3 40501.7 925.043   3
   0   1  -3 40523.0 1218.25   1
   0   1  -4 219967. 4391.52   1
   0  -1  -4 214777. 4188.69   1
   0   1  -4 211012. 3795.13   3
   0   1   4 226630. 4209.79   6
   0   1  -4 214985. 3760.13   2
   0  -1   4 210529. 3759.34   3
   0  -1  -4 209825. 3780.68   3
   0   1   4 217036. 3764.89   2
   0  -1  -5 131773. 2414.46   3
   0  -1  -5 128411. 2991.92   1
   0  -1   5 130567. 2398.36   3
   0   1  -5 128040. 3136.06   1
   0   1   5 135705. 2989.26   6
   0  -1   6 23667.7 1196.55   6
   0   1  -6 24941.4 1195.17   1
   0  -1  -6 22897.5 1051.65   1
   0   1   6 22983.3 1034.56   6
   0  -1  -7 72475.6 2201.40   1
   0   1   7 69277.6 2141.47   6
   0   1  -7 67201.5 2294.41   1
   0  -1   7 69382.5 2305.23   6
   0  -1  -8 137243. 3664.58   1
   0   1   8 145147. 3633.06   6
   0   1  -8 139222. 3819.44   1
   0  -1   8 141579. 3827.07   6
   0   1   9 18958.7 1190.06   6
   0  -1   9 18631.7 1274.90   6
   0  -1  -9 19754.5 1239.31   1
   0   1  -9 18427.3 1310.32   1
   0   1 -10 304.390 565.403   1
   0  -1  10 175.183 505.607   6
   0   1  10-156.291 465.808   6
   0  -1 -11 35077.1 1846.24   1
   0   1 -11 34340.2 1941.51   1
   0  -1  11 33304.9 1886.44   6
   0   1  11 33724.5 1775.05   6
   0  -1  12 37781.3 2080.95   6
   0   1  12 41470.4 2053.04   6
   0   1 -12 38560.9 2180.25   1
   0  -1 -12 40378.1 2101.15   1
   0   1 -13 5970.46 1043.70   1
   0   1  13 6888.42 955.306   6
   0   1  13 5798.90 735.651   7
   0  -1 -13 4980.15 860.067   1
   0  -1  13 6075.59 973.975   6
   0   1  14 5449.83 907.777   6
   0  -1  14 3381.21 832.707   6
   0   1  14 3614.23 660.243   7
   0   1  15 13123.8 1187.35   7
   0  -1  15 13104.5 1434.71   6
   0   1  15 13813.4 1391.40   6
   0   1  16 5182.04 991.096   6
   0  -1  16 4701.21 946.924   6
   0  -1  17 1803.07 817.593   6
   0   1  17 3281.69 868.067   6
   0  -1  18 11532.8 1557.26   6
   0   2   1 12661.9 553.763   4
   0   2   1 12927.5 561.811   3
   0   2  -1 11805.5 530.080   3
   0  -2   1 11455.7 455.157   1
   0   2  -1 11703.1 532.024   2
   0   2   1 11960.1 548.505   7
   0   2   1 11861.6 535.955   2
   0   2  -2 234927. 4482.38   2
   0   2   2 238471. 4491.42   2
   0   2   2 231721. 4298.86   5
   0   2  -2 240811. 4539.02   1
   0   2   2 233537. 4595.05   7
   0   2   2 240825. 4669.54   4
   0  -2  -2 237404. 4313.85   5
   0   2   2 244472. 4524.15   3
   0   2  -2 235775. 4522.79   3
   0  -2  -3 266025. 4891.77   1
   0  -2  -3 271583. 5051.62   5
   0   2   3 272127. 5403.76   4
   0   2  -3 272194. 5259.58   1
   0   2  -3 264323. 5030.74   2
   0   2   3 268859. 5270.67   7
   0   2   3 278126. 5058.98   3
   0   2  -3 272025. 5074.15   3
   0   2   3 266472. 4798.84   6
   0   2   3 269549. 5035.20   2
   0   2  -4 94112.9 2120.54   3
   0   2  -4 94233.8 2089.69   2
   0  -2  -4 93971.3 2133.81   1
   0   2   4 98291.3 2075.16   6
   0   2   4 95806.7 2099.19   3
   0   2   4 99799.2 2599.54   4
   0   2  -4 98390.1 2455.71   1
   0   2   4 99025.5 2421.17   7
   0   2   4 94807.6 2090.97   2
   0  -2  -5-45.3617 212.231   1
   0   2  -5 140.709 164.464   2
   0   2  -5 344.634 329.032   1
   0  -2   5 447.103 317.363   6
   0   2   5 512.768 193.300   3
   0   2   5 431.578 198.695   2
   0   2   5 298.752 309.476   4
   0   2   5-100.265 212.241   7
   0   2   5 135.820 191.528   6
   0   2  -5 455.689 196.232   3
   0   2   6 24135.3 773.199   2
   0   2  -6 25728.8 1249.12   1
   0   2   6 25929.3 1146.13   7
   0   2  -6 25701.7 832.709   3
   0  -2   6 27693.0 1330.23   6
   0   2   6 23335.7 1001.01   6
   0   2  -6 24190.7 777.398   2
   0  -2  -6 23206.0 1023.61   1
   0   2   7 209534. 4671.58   7
   0  -2  -7 203991. 3923.63   3
   0   2  -7 204438. 4943.37   1
   0   2   7 205174. 4515.05   6
   0  -2   7 222973. 5042.41   6
   0  -2  -7 212257. 4623.23   1
   0  -2  -8 13289.5 493.691   3
   0  -2  -8 13779.3 941.060   1
   0   2   8 13009.2 894.798   6
   0   2   8 12773.0 888.540   7
   0   2  -8 14165.3 1112.39   1
   0  -2   8 13925.9 1117.63   6
   0  -2   9 94885.7 3102.93   6
   0   2   9 86053.4 2666.41   6
   0   2  -9 93563.5 3125.62   1
   0   2   9 91161.5 2754.26   7
   0  -2  -9 88010.0 2769.69   1
   0  -2  10 4957.83 885.200   6
   0  -2 -10 4736.95 690.440   1
   0   2  10 5923.92 693.580   7
   0   2 -10 5291.67 921.283   1
   0   2  10 5871.99 743.497   6
   0   2 -11 10113.9 1190.11   1
   0   2  11 9040.10 904.223   6
   0   2  11 13055.1 1010.17   7
   0  -2 -11 9575.08 969.471   1
   0  -2  11 11029.0 1205.61   6
   0   2  12 873.241 414.994   7
   0  -2  12 1251.30 714.446   6
   0  -2 -12 1110.72 598.109   1
   0   2 -12-167.553 583.803   1
   0   2  12 451.461 462.934   6
   0  -2  13 52624.3 2674.26   6
   0  -2 -13 51663.3 2488.59   1
   0   2  13 53765.5 2316.03   7
   0   2  13 54343.5 2438.86   6
   0  -2  14 20921.6 1754.05   6
   0   2  14 18713.2 1481.93   6
   0   2  14 15718.4 1287.93   7
   0   2  15 6811.39 912.745   7
   0   2  15 9752.11 1104.92   6
   0  -2  15 9515.56 1320.87   6
   0  -2  16 92.7263 683.623   6
   0   2  16 1509.15 805.316   4
   0  -2  17 9354.70 1455.65   6
   0   2  17 9912.36 1520.30   4
   0   2  18 2638.82 1013.45   4
   0   3   0-33.8667 302.373   2
   0   3   0 77.7907 233.464   4
   0   3   0 406.258 317.337   3
   0  -3   0 253.676 148.596   6
   0   3  -1 3343.52 483.791   2
   0  -3  -1 3558.24 275.508   5
   0   3   1 3640.02 431.024   7
   0   3   1 3566.34 434.454   2
   0   3  -1 3362.28 464.852   3
   0  -3   1 3371.42 340.560   6
   0   3   1 3662.33 444.715   3
   0   3   1 3281.78 389.928   4
   0   3  -2 131170. 2944.59   2
   0   3   2 132141. 2958.50   2
   0  -3  -2 129894. 2583.97   5
   0   3   2 133967. 2994.21   3
   0   3   2 136568. 3055.53   4
   0   3   2 130616. 3033.43   7
   0   3  -2 134885. 3008.33   3
   0   3  -3 77505.1 1996.21   2
   0   3   3 78427.4 2152.06   7
   0   3  -3 79514.7 2064.47   1
   0   3  -3 78472.2 2055.68   3
   0  -3  -3 77618.8 1805.63   5
   0   3   3 80479.8 2211.22   4
   0   3   3 77802.3 2012.82   3
   0   3   3 76742.8 1990.08   2
   0   3   4 8764.79 666.755   7
   0  -3  -4 8597.58 532.162   5
   0   3  -4 8223.85 565.584   3
   0   3   4 9351.77 715.885   4
   0   3   4 9645.86 386.406   6
   0   3  -4 9064.46 690.310   1
   0   3  -4 8222.87 546.226   2
   0   3   4 8754.26 564.279   2
   0   3   4 7809.87 540.726   3
   0  -3  -4 8917.32 447.378   1
   0  -3   4 9396.01 720.617   6
   0  -3   5 142551. 3491.02   6
   0   3   5 139945. 3497.77   4
   0   3   5 133269. 2943.90   2
   0   3   5 130497. 2724.85   6
   0  -3  -5 128494. 2843.70   1
   0   3   5 133278. 2964.19   3
   0   3  -5 131654. 2946.38   2
   0   3  -5 131375. 3009.06   3
   0   3  -5 136185. 3361.13   1
   0   3   5 131325. 3300.63   7
   0   3   6 1633.27 308.359   3
   0   3   6 1361.95 292.446   2
   0   3  -6 2051.84 517.927   1
   0   3   6 1363.49 280.431   6
   0   3   6 1508.58 418.911   7
   0  -3  -6 1321.89 320.454   1
   0  -3   6 1722.78 510.619   6
   0   3  -6 1335.73 277.915   2
   0   3   6 1189.83 408.789   4
   0   3  -6 1803.75 343.153   3
   0   3   7 1854.09 357.663   6
   0   3  -7 1496.20 530.767   1
   0   3  -7 2320.23 375.372   3
   0   3   7 1925.81 470.608   7
   0   3   7 1857.75 305.428   2
   0   3   7 2126.97 548.451   4
   0  -3  -7 1760.22 413.289   1
   0  -3   7 1549.99 525.231   6
   0   3  -7 2051.09 304.864   2
   0   3   8 18817.0 979.348   6
   0   3  -8 17533.3 1287.38   1
   0   3   8 19641.6 1173.86   7
   0  -3   8 22113.2 1436.91   6
   0  -3  -8 18956.4 1064.90   1
   0   3   8 19938.8 1356.50   4
   0   3  -9 139304. 4187.54   1
   0  -3   9 147554. 4216.91   6
   0   3   9 137371. 3828.30   7
   0   3   9 141546. 3545.88   6
   0  -3  -9 139948. 3681.69   1
   0   3   9 143567. 4315.41   4
   0  -3  10 960.549 649.694   6
   0  -3 -10 857.851 402.750   1
   0   3  10 1825.73 472.239   6
   0   3  10 713.733 411.113   7
   0   3 -10 916.202 559.524   1
   0   3  11 103185. 3342.78   7
   0  -3 -11 99847.6 3280.51   1
   0   3  11 106532. 3902.90   4
   0   3  11 111866. 3265.34   6
   0  -3  11 111568. 3800.06   6
   0  -3 -12 1655.83 569.753   1
   0  -3  12 423.511 657.624   6
   0   3  12 639.669 449.613   7
   0   3  12 491.025 430.210   6
   0   3  12 525.224 611.479   4
   0   3  13 9363.22 977.910   6
   0   3  13 9003.53 1204.11   4
   0   3  13 10106.8 1009.21   7
   0  -3 -13 10664.2 1150.39   1
   0  -3  13 13150.1 1401.99   6
   0   3  14 2107.06 856.428   4
   0   3  14 372.207 421.061   7
   0  -3  14 1379.05 835.212   6
   0   3  15 59522.0 2727.91   7
   0   3  15 58599.1 3209.13   4
   0  -3  15 63207.7 3224.24   6
   0   3  16 1734.48 927.532   4
   0  -3  16 1028.28 774.361   6
   0   3  17 11459.8 1571.70   4
   0  -3  17 9747.78 1460.85   6
   0   4   0 11856.3 763.156   2
   0  -4   0 9778.36 472.183   6
   0   4   0 10979.6 731.918   3
   0   4   1 37525.7 1373.82   2
   0  -4   1 34458.0 1116.30   6
   0   4   1 37413.3 1410.45   3
   0   4  -1 35607.7 1384.12   3
   0   4   1 36041.5 1367.16   4
   0  -4  -1 37384.4 851.619   6
   0   4  -1 35375.3 1355.02   2
   0   4  -2 40875.2 1488.00   2
   0  -4  -2 42506.2 1103.48   5
   0   4  -2 43070.0 1545.85   3
   0   4   2 41926.4 1494.36   2
   0   4   2 43215.8 1521.29   4
   0  -4   2 40759.9 1358.61   6
   0   4   2 41997.2 1562.01   7
   0   4   2 41786.4 1515.62   3
   0   4  -3 119904. 3016.36   2
   0   4  -3 121967. 3093.41   3
   0   4   3 125578. 3044.66   2
   0  -4   3 124361. 3037.96   6
   0   4   3 120835. 3153.31   7
   0   4   3 124243. 3054.05   3
   0  -4  -3 124940. 2613.70   5
   0   4   3 125586. 3159.65   4
   0   4  -4 86278.4 2455.07   3
   0  -4  -4 90596.9 1924.02   1
   0   4  -4 87024.2 2394.93   2
   0   4   4 87936.9 2414.16   2
   0  -4   4 93995.4 2582.64   6
   0   4   4 85322.4 2587.69   7
   0  -4  -4 90773.9 2184.33   5
   0   4   4 91565.2 2439.30   3
   0   4   4 95269.9 2701.91   4
   0  -4   5 21509.2 1181.23   6
   0   4  -5 20224.5 1010.19   3
   0  -4  -5 20408.3 777.646   1
   0   4   5 19709.0 1131.13   7
   0   4   5 22314.8 1221.35   4
   0   4   5 21671.5 1005.27   2
   0   4   5 20480.7 994.589   3
   0   4  -5 20025.8 969.622   2
   0   4   5 18464.1 573.286   6
   0   4   6 20838.2 1249.97   4
   0   4   6 17828.0 679.581   6
   0  -4   6 20868.6 1262.97   6
   0   4   6 17844.1 944.298   3
   0   4  -6 19071.0 958.852   2
   0  -4  -6 17664.9 802.321   1
   0   4  -6 18144.8 977.698   3
   0   4   6 16982.6 1102.35   7
   0   4   6 18266.5 929.625   2
   0   4  -7 56361.3 1845.20   3
   0   4   7 52899.6 1545.39   6
   0   4  -7 56028.3 1747.77   2
   0   4   7 57922.3 2163.33   7
   0  -4   7 60796.7 2322.44   6
   0   4   7 55626.8 1729.37   2
   0   4   7 61312.8 2347.08   4
   0  -4  -7 56567.1 1738.18   1
   0   4   7 58956.8 1791.24   3
   0   4   8 36995.8 1881.61   4
   0  -4  -8 37002.6 1442.36   1
   0   4   8 36430.3 1753.21   7
   0   4   8 37913.7 1346.47   2
   0  -4   8 39103.8 1934.96   6
   0   4  -8 38775.0 1456.42   3
   0   4  -8 34827.9 1316.74   2
   0   4   8 39341.8 1347.77   6
   0   4   9 44213.7 2002.90   7
   0   4   9 47914.3 2246.96   4
   0   4   9 47559.4 1625.63   6
   0  -4   9 45808.1 2185.54   6
   0  -4  -9 42860.2 1711.79   1
   0  -4  10 43902.4 2234.94   6
   0   4  10 41380.6 2157.76   4
   0  -4 -10 36339.2 1650.24   1
   0   4  10 39230.5 1572.02   6
   0   4  10 37137.4 1859.40   7
   0   4  11 19349.6 1355.28   7
   0   4  11 21831.6 1633.37   4
   0  -4  11 20255.9 1582.75   6
   0  -4 -11 19644.9 1289.55   1
   0   4  12 10992.3 1075.23   7
   0   4  12 9409.11 1129.00   4
   0  -4  12 11872.2 1329.32   6
   0  -4 -12 10130.0 983.945   1
   0   4  13 26306.5 1711.52   7
   0  -4  13 28556.1 2046.15   6
   0   4  13 30003.1 2114.91   4
   0  -4 -13 29468.5 1729.27   1
   0  -4  14 28848.0 2181.26   6
   0   4  14 29521.0 1858.75   7
   0   4  14 29785.6 2189.16   4
   0   4  15 712.096 362.935   7
   0  -4  15 1328.90 765.533   6
   0   4  15 1325.61 677.082   4
   0   4  16 7763.49 1247.21   4
   0  -4  16 7939.37 1409.48   6
   0   4  17 6985.13 1295.52   4
   0   5   0-670.998 507.177   2
   0   5   0-314.362 353.954   3
   0  -5   0-17.7843 164.526   6
   0  -5   1 13078.6 684.878   6
   0   5  -1 14431.4 931.208   2
   0   5   1 13419.0 942.160   2
   0   5  -1 12764.5 922.573   3
   0   5   1 13795.7 916.788   4
   0  -5  -1 14030.7 497.662   6
   0   5   1 13915.5 952.482   3
   0   5   2 245918. 5350.61   2
   0  -5   2 234839. 4984.70   6
   0   5   2 249462. 5432.96   4
   0  -5  -2 245725. 4605.71   5
   0   5   2 244038. 5393.40   3
   0   5  -2 237881. 5332.04   2
   0   5  -2 240698. 5425.66   3
   0   5   3 119.057 369.791   2
   0   5  -3-379.197 438.177   3
   0  -5   3 313.126 315.608   6
   0   5  -3-160.968 407.988   2
   0   5   3 238.564 343.852   7
   0   5   3-84.0294 362.232   3
   0   5   3-207.676 304.806   4
   0  -5  -3 343.514 161.353   5
   0   5   4 173084. 4114.98   2
   0   5  -4 167649. 4179.35   3
   0   5   4 177164. 4333.28   4
   0  -5  -4 170055. 3239.31   1
   0   5   4 172007. 4326.14   7
   0  -5  -4 170516. 3627.44   5
   0   5   4 174601. 4126.75   3
   0   5  -4 165181. 4069.79   2
   0  -5   4 173575. 4132.27   6
   0   5  -5 11995.0 880.157   2
   0   5   5 12283.7 890.158   2
   0  -5   5 12448.9 935.426   6
   0  -5  -5 11964.3 540.522   1
   0   5   5 12949.3 1024.95   4
   0   5   5 12537.0 908.027   3
   0  -5  -5 11939.3 714.594   5
   0   5  -5 11567.7 887.227   3
   0   5   5 11081.5 968.390   7
   0   5   6 70346.6 2286.92   7
   0   5   6 73828.0 2340.00   4
   0   5   6 72278.0 1925.33   3
   0   5  -6 70068.7 1880.59   2
   0   5  -6 65982.1 1952.00   3
   0  -5  -6 66715.4 1314.80   1
   0  -5   6 66498.7 2160.19   6
   0   5   6 66987.0 1840.23   2
   0   5  -7 6945.29 682.905   2
   0   5   7 5360.11 328.722   6
   0  -5  -7 5777.38 498.183   1
   0   5   7 5046.05 711.731   7
   0   5   7 6893.56 707.576   3
   0   5   7 5813.66 635.744   2
   0  -5   7 6645.70 874.102   6
   0   5  -7 7834.04 791.148   3
   0   5   7 5404.44 780.636   4
   0   5   8 27056.9 1668.27   4
   0   5   8 27326.2 1272.48   3
   0   5   8 24140.0 1200.68   2
   0   5  -8 29052.8 1400.82   3
   0  -5   8 26759.5 1650.88   6
   0   5   8 25420.2 1542.61   7
   0   5  -8 27299.5 1268.69   2
   0  -5  -8 25849.6 1125.03   1
   0  -5   9 26650.4 1713.84   6
   0   5   9 23743.3 1505.21   7
   0  -5  -9 21351.6 1109.25   1
   0   5   9 26143.7 1685.37   4
   0   5   9 23618.2 1157.35   2
   0   5  -9 23223.1 1162.60   2
   0   5  10 848.605 407.019   7
   0  -5  10 168.496 519.742   6
   0   5  10 382.929 457.211   4
   0  -5 -10 473.389 334.015   1
   0  -5  11 3324.32 865.302   6
   0   5  11 4817.90 789.706   7
   0   5  11 3884.52 771.040   4
   0   5  12 28168.3 1963.10   4
   0  -5  12 25187.3 1902.44   6
   0   5  12 25965.4 1705.19   7
   0   5  13 1633.95 674.117   4
   0   5  13 220.873 487.300   7
   0  -5  13 1272.47 745.473   6
   0  -5  14 8975.83 1330.26   6
   0   5  14 8939.65 1217.30   4
   0   5  14 7421.03 1016.09   7
   0  -5  15 1424.25 714.213   6
   0   5  15 1394.41 635.947   7
   0   5  15 394.034 518.223   4
   0   5  16 11162.7 1428.59   4
   0  -5  16 10570.8 1474.51   6
   0   5  17-41.1463 609.673   4
   0  -6   0 399238. 7298.40   6
   0   6   0 386185. 8295.29   3
   0   6   0 399133. 8248.75   2
   0   6   1 706.669 380.384   4
   0  -6  -1 674.461 164.093   6
   0   6   1 227.826 452.173   2
   0   6  -1-614.438 540.320   3
   0   6  -1-79.4509 458.995   2
   0   6   1 458.050 543.779   3
   0  -6   1 850.189 290.125   6
   0   6   2 20052.9 1259.34   3
   0   6   2 21538.3 1281.75   4
   0   6   2 20897.3 1252.83   2
   0   6  -2 20207.9 1237.44   2
   0   6  -2 20457.3 1262.75   3
   0  -6   2 20551.9 1015.85   6
   0  -6  -2 19843.9 650.616   1
   0  -6  -2 21762.0 803.873   5
   0   6  -3-255.610 511.674   3
   0   6  -3 507.112 522.045   2
   0   6   3 833.750 477.195   4
   0  -6  -3 46.5817 180.169   5
   0   6   3 634.020 485.898   3
   0  -6   3 314.934 384.586   6
   0   6   3 502.298 508.636   2
   0   6  -4 54328.8 2174.45   3
   0   6  -4 55744.0 2114.27   2
   0   6   4 61519.8 2318.06   4
   0   6   4 56327.8 2296.99   7
   0   6   4 58775.5 2176.76   3
   0   6   4 59153.6 2159.18   2
   0  -6  -4 55074.6 1225.57   1
   0  -6   4 54570.1 2009.03   6
   0  -6  -4 58392.3 1626.81   5
   0  -6  -5 1412.68 304.845   5
   0   6  -5 1711.39 500.099   3
   0   6   5 2235.98 614.667   4
   0  -6   5 2757.69 639.171   6
   0  -6  -5 1658.17 198.218   1
   0   6   5 2898.90 686.874   7
   0   6   5 1632.43 505.115   2
   0   6   5 1251.54 529.716   3
   0   6  -5 1351.39 493.978   2
   0   6   6 180143. 4889.04   7
   0   6  -6 175053. 4401.10   2
   0   6   6 182826. 4838.61   4
   0   6   6 185870. 4511.11   3
   0  -6   6 181413. 4689.43   6
   0   6   6 180729. 4429.30   2
   0   6  -6 173333. 4537.96   3
   0  -6  -6 170175. 3466.86   1
   0  -6  -7 10603.0 579.095   1
   0   6  -7 10700.9 907.144   2
   0   6   7 11453.5 1092.05   4
   0   6   7 10551.5 878.109   2
   0   6   7 9139.04 1037.06   7
   0   6  -7 9767.00 951.958   3
   0  -6   7 8873.91 1057.73   6
   0   6   7 10147.0 900.553   3
   0   6  -8 3037.01 606.838   3
   0   6   8 3134.36 581.306   3
   0  -6   8 1775.96 652.365   6
   0   6   8 2174.98 511.368   2
   0   6   8 3022.40 749.447   7
   0   6  -8 2497.03 463.242   2
   0   6   8 3198.00 678.505   4
   0   6  -9 4126.24 589.441   2
   0   6   9 4507.63 800.213   7
   0   6   9 5302.63 855.483   4
   0   6   9 4213.10 611.745   2
   0  -6   9 3785.49 840.384   6
   0   6  -9 4819.50 700.123   3
   0   6  10 37774.1 2183.08   4
   0  -6  10 38478.4 2222.31   6
   0   6  10 34934.6 2023.52   7
   0   6  11 5249.92 850.309   7
   0   6  11 6659.67 947.523   4
   0  -6  11 5689.67 1001.84   6
   0   6  12 5818.37 936.100   7
   0   6  12 6310.97 977.449   4
   0  -6  12 4761.01 1029.47   6
   0   6  13 4537.06 829.540   7
   0   6  13 5509.29 986.967   4
   0  -6  13 5206.37 1099.08   6
   0   6  14 1174.39 564.419   7
   0   6  14 1042.10 634.546   4
   0  -6  14 1580.75 858.481   6
   0   6  15 579.690 537.606   7
   0  -6  15 605.948 728.539   6
   0   6  15 409.536 498.470   4
   0   6  16 6828.72 1191.36   4
   0   7   0 123.553 488.244   2
   0  -7   0-124.743 208.654   6
   0   7   0 276.526 529.454   3
   0   7   1 78908.4 2826.29   2
   0  -7  -1 84967.4 1837.32   6
   0   7  -1 81437.7 2898.09   3
   0   7  -1 83679.7 2899.92   2
   0   7   1 85183.1 2924.33   3
   0  -7  -1 84904.7 2176.68   5
   0  -7   1 82514.3 2238.78   6
   0  -7   2 100733. 2750.40   6
   0   7   2 106684. 3357.44   3
   0   7  -2 108975. 3430.47   3
   0  -7  -2 105921. 2418.45   5
   0   7  -2 106529. 3310.24   2
   0   7   2 105601. 3311.46   2
   0   7   2 109736. 3405.73   4
   0  -7  -3 9071.74 541.241   5
   0   7  -3 11016.9 1101.35   2
   0  -7   3 8844.81 796.432   6
   0   7   3 10104.3 1036.36   3
   0   7  -3 12384.2 1176.88   3
   0   7   3 9480.02 942.308   4
   0   7   3 10197.5 1034.58   2
   0  -7   4 5233.73 708.464   6
   0   7   4 5755.38 809.623   4
   0   7   4 5652.41 823.407   3
   0  -7  -4 5411.76 464.332   5
   0   7  -4 6402.47 822.928   3
   0   7  -4 6299.48 826.343   2
   0   7   4 7253.82 897.225   2
   0  -7  -5 85388.1 2303.93   5
   0   7  -5 85278.1 3045.40   3
   0   7  -5 85787.4 2908.54   2
   0   7   5 86263.2 3171.21   7
   0   7   5 87016.6 2944.60   3
   0   7   5 88329.9 3139.99   4
   0   7   5 83476.8 2909.14   2
   0  -7   5 87893.3 2850.91   6
   0   7   6 23.7170 504.828   3
   0   7  -6 407.788 520.827   3
   0   7  -6 175.486 431.352   2
   0   7   6 665.414 522.514   4
   0   7   6 595.280 506.017   7
   0  -7   6 514.143 519.588   6
   0   7   6 281.313 436.411   2
   0   7   7 26787.5 1773.95   7
   0   7  -7 29851.7 1703.83   3
   0   7   7 31206.7 1858.40   4
   0   7  -7 29439.8 1587.72   2
   0   7   7 27718.0 1542.96   2
   0   7   7 30201.1 1617.15   3
   0  -7   7 30891.5 1759.34   6
   0   7   8 22162.9 1397.54   3
   0   7   8 21257.7 1598.33   7
   0  -7   8 20190.9 1509.50   6
   0   7   8 23016.8 1640.38   4
   0   7  -8 20716.4 1310.23   2
   0   7   8 21091.8 1345.01   2
   0   7  -8 21851.8 1462.29   3
   0   7   9 14063.3 1353.87   4
   0   7   9 13421.6 1319.34   7
   0   7  -9 16430.5 1255.08   3
   0   7  -9 14222.8 1113.33   2
   0   7   9 15849.7 1135.45   2
   0  -7   9 17068.2 1465.92   6
   0   7  10 190.402 435.080   7
   0   7  10-402.990 456.159   4
   0  -7  10-52.5774 607.948   6
   0   7  11 25927.3 1853.37   7
   0  -7  11 23892.4 1922.52   6
   0   7  11 28282.5 2015.91   4
   0   7  12 1375.81 605.898   4
   0   7  12 2062.62 631.724   7
   0  -7  12 3490.14 939.432   6
   0   7  13 2562.00 769.325   4
   0   7  13 2129.01 676.274   7
   0  -7  13 2915.02 962.748   6
   0   7  14 339.207 488.207   7
   0   7  14 844.360 611.267   4
   0  -7  14 1794.03 924.097   6
   0   7  15 4528.04 942.890   7
   0   7  15 3301.45 827.465   4
   0  -7  15 2853.92 918.122   6
   0  -8   0 8852.11 582.078   6
   0   8   0 10099.2 1064.12   2
   0   8   1 23286.2 1565.64   3
   0   8   1 22134.3 1508.60   2
   0   8  -1 20574.9 1475.45   2
   0  -8  -1 23594.0 1018.78   5
   0   8  -1 21311.9 1539.90   3
   0  -8   1 22838.5 1059.21   6
   0   8  -2 4230.30 851.168   3
   0   8   2 4553.10 845.678   2
   0   8  -2 5198.72 874.506   2
   0  -8   2 3557.57 532.656   6
   0   8   2 4953.11 858.705   3
   0  -8  -2 4292.23 398.275   5
   0   8   3 60810.3 2514.60   2
   0   8   3 64479.2 2660.77   4
   0   8  -3 65318.1 2682.45   3
   0  -8   3 58954.4 2103.13   6
   0   8   3 59199.4 2538.17   3
   0   8  -3 59673.7 2511.26   2
   0  -8  -3 58458.3 1632.04   5
   0   8  -4 760.966 616.453   3
   0   8   4 1129.59 620.474   2
   0   8   4 512.847 545.024   4
   0  -8   4 252.091 410.638   6
   0   8   4 806.131 589.289   3
   0   8  -4 1728.77 666.094   2
   0  -8   5 140.628 418.760   6
   0   8   5 733.004 562.435   4
   0   8   5-97.1137 495.613   2
   0   8   5 983.787 586.036   3
   0   8  -5 578.408 496.087   3
   0   8  -5 236.799 476.476   2
   0   8   6-244.234 435.731   4
   0  -8   6 591.520 493.826   6
   0   8  -6 28.3936 494.429   2
   0   8  -6 13.3603 461.894   3
   0   8   6 1282.97 598.251   3
   0   8   6 1528.99 606.100   2
   0   8   7 67616.5 2705.70   2
   0   8   7 72414.1 3122.29   7
   0   8   7 71063.2 2746.09   3
   0   8  -7 68045.0 2686.84   2
   0  -8   7 64534.7 2718.46   6
   0   8  -7 60743.6 2751.81   3
   0   8   7 71203.0 3040.49   4
   0  -8   8 3138.58 829.606   6
   0   8  -8 4137.09 781.948   3
   0   8   8 2474.49 598.385   2
   0   8   8 2658.88 694.531   7
   0   8   8 3249.47 700.214   4
   0   8  -8 2964.74 687.085   2
   0   8   8 3818.43 755.449   3
   0   8   9 24899.4 1828.00   4
   0  -8   9 24414.0 1785.85   6
   0   8  -9 23701.5 1535.20   2
   0   8   9 27788.5 1980.08   7
   0   8   9 23894.3 1532.54   2
   0   8  10 391.031 408.863   4
   0  -8  10 1318.42 724.455   6
   0   8  10 512.134 621.610   7
   0   8  11 5902.63 1034.70   7
   0  -8  11 6011.46 1000.83   6
   0   8  11 6261.43 1054.28   4
   0  -8  12 99.3649 626.190   6
   0   8  12 634.289 606.203   7
   0   8  12-8.23845 567.074   4
   0   8  13 32199.9 2311.92   4
   0   8  13 33981.6 2334.90   7
   0  -8  13 34588.8 2494.34   6
   0  -8  14 1230.91 878.604   6
   0   8  14 121.467 539.481   4
   0   8  14 2254.25 746.319   7
   0   8  15 1630.83 678.492   7
   0   9   0-158.092 615.304   2
   0   9   0 208.408 565.050   3
   0   9   1 5583.77 967.836   3
   0   9  -1 6694.17 1017.76   3
   0   9  -1 5198.23 910.682   2
   0   9   1 5805.20 973.285   2
   0   9   2 47190.0 2376.54   3
   0   9  -2 42708.9 2345.10   3
   0  -9   2 46103.0 1743.78   6
   0   9   2 46167.3 2333.17   2
   0   9  -2 41107.3 2191.41   2
   0   9   3 4207.37 808.148   4
   0   9   3 3817.97 790.063   2
   0   9  -3 4522.59 835.151   2
   0   9   3 3592.96 850.163   3
   0   9  -3 3883.66 869.471   3
   0  -9   3 4058.68 567.690   6
   0   9   4 15748.3 1392.03   3
   0  -9   4 14638.3 1078.67   6
   0   9   4 13668.2 1309.63   4
   0   9  -4 16482.2 1380.03   2
   0   9  -4 12592.1 1331.35   3
   0   9   4 14448.1 1321.44   2
   0   9  -5 25830.2 1714.33   2
   0   9  -5 28117.1 1912.29   3
   0   9   5 29805.4 1850.63   3
   0   9   5 28784.1 1824.23   2
   0   9   5 28932.6 1928.83   4
   0  -9   5 28268.3 1611.41   6
   0   9   6 4077.26 819.927   2
   0  -9   6 2745.83 657.239   6
   0   9  -6 4798.53 826.955   2
   0   9   6 5288.56 916.055   4
   0   9   6 4326.68 865.042   3
   0   9  -6 4272.75 886.387   3
   0   9  -7 2277.78 606.156   2
   0   9   7 2756.62 810.177   4
   0   9  -7 3501.82 881.128   3
   0  -9   7 2094.20 611.538   6
   0   9   7 3434.23 769.428   3
   0   9   7 1524.35 612.224   2
   0   9   8 21286.8 1730.40   4
   0   9  -8 20107.9 1640.58   3
   0   9   8 19804.5 1494.48   2
   0   9   8 21893.1 1611.69   3
   0   9  -8 21778.0 1586.77   2
   0  -9   8 21586.1 1612.32   6
   0   9  -9 32511.1 1931.53   2
   0   9   9 27437.3 1768.05   2
   0  -9   9 26876.0 1895.86   6
   0   9   9 25019.5 1929.89   4
   0   9  10 2715.66 821.179   7
   0   9  10 2835.53 811.992   4
   0  -9  10 4433.91 1052.69   6
   0  -9  11 17310.0 1701.89   6
   0   9  11 14977.7 1625.18   7
   0   9  11 13886.3 1513.92   4
   0  -9  12 1302.55 818.929   6
   0   9  12 1923.45 744.953   7
   0   9  12 697.453 491.944   4
   0   9  13 1566.45 772.075   7
   0   9  13 1120.61 535.990   4
   0  -9  13 1679.88 869.595   6
   0   9  14 1975.55 715.181   7
   0  10   0 28773.9 1943.25   2
   0  10   0 27211.1 1968.47   3
   0  10  -1 592.084 660.410   3
   0  10   1-115.050 536.226   2
   0  10  -1 44.1676 558.813   2
   0  10   1 1490.07 770.491   3
   0  10   2 4507.92 880.884   2
   0  10   2 4350.13 871.244   3
   0  10  -2 3588.90 867.285   2
   0  10  -2 4484.74 1018.96   3
   0  10  -3 78.6614 586.653   3
   0  10   3 1255.75 716.091   3
   0  10  -3 29.3668 526.011   2
   0  10   3 459.591 575.646   2
   0  10   4 9357.21 1163.30   4
   0  10   4 9771.09 1230.52   3
   0 -10   4 9082.72 919.025   6
   0  10  -4 7971.41 1155.89   3
   0  10  -4 8595.92 1083.56   2
   0  10   4 8484.80 1124.57   2
   0  10   5 5473.24 1014.47   4
   0  10  -5 2557.66 666.337   2
   0  10  -5 4750.70 981.095   3
   0 -10   5 4081.89 690.798   6
   0  10   5 3854.74 844.485   3
   0  10   5 5915.70 998.414   2
   0  10   6 10587.1 1202.53   3
   0  10  -6 12317.2 1328.30   2
   0  10   6 12728.0 1442.53   4
   0 -10   6 11255.7 1105.49   6
   0  10   6 13109.2 1345.44   2
   0  10  -6 15503.3 1574.39   3
   0 -10   7 2969.55 713.175   6
   0  10   7 3014.03 774.790   4
   0  10   7 5464.11 988.030   3
   0  10   7 3957.87 853.726   2
   0  10  -7 3630.91 850.204   2
   0  10  -7 4896.83 983.425   3
   0  10   8 1110.74 514.967   2
   0  10   8 798.610 613.478   4
   0 -10   8 127.189 539.946   6
   0  10  -8 432.233 576.462   2
   0  10  -9 722.733 597.620   2
   0  10   9 993.738 586.725   4
   0 -10   9 1005.06 637.716   6
   0 -10  10 7269.40 1178.76   6
   0  10  10 6968.96 1180.34   4
   0 -10  11 10667.6 1375.27   6
   0  10  11 7980.22 1254.49   4
   0 -10  12-1123.97 879.974   6
   0  10  12-257.960 511.602   4
   0  11   0 423.794 752.190   3
   0  11   0-405.220 613.994   2
   0  11   1 240.013 618.964   3
   0  11  -1 119.832 631.153   2
   0  11   1 40.0837 656.257   2
   0  11  -2 18369.0 1685.52   2
   0  11   2 16241.7 1614.12   3
   0  11   2 20155.5 1745.29   2
   0  11  -2 19774.7 1749.88   3
   0  11   3 1027.84 749.605   3
   0  11  -3 1020.60 845.183   3
   0  11  -3-30.7783 604.277   2
   0  11   3 941.489 760.390   2
   0  11  -4 16921.9 1690.67   3
   0  11  -4 15809.3 1554.99   2
   0  11   4 15879.6 1571.75   2
   0  11   4 17611.8 1677.89   3
   0  11  -5 2301.44 963.855   3
   0  11   5 1361.43 809.179   2
   0  11   5 2023.18 789.273   3
   0  11  -5 1097.81 760.328   2
   0  11  -6 4815.84 1198.42   3
   0  11  -6 2239.64 745.237   2
   0  11   6 1821.70 697.028   2
   0  11   6 4600.86 1010.88   4
   0  11   6 5463.80 1054.74   3
   0  11  -7 38.0135 542.522   2
   0  11   7 303.320 568.384   4
   0  11  -7 555.465 708.978   3
   0  11   7 506.990 635.920   2
   0 -11   7 1504.49 727.765   6
   0  11  -8 5140.44 1022.40   2
   0  11   8 4654.57 1000.79   4
   0  11   8 3217.05 763.807   2
   0 -11   8 3547.23 850.923   6
   0 -11   9 525.605 576.665   6
   0  11   9 1212.79 809.498   4
   0  11  -9-342.368 527.769   2
   0  11  10 1295.85 683.576   4
   0 -11  10 853.469 661.163   6
   0 -11  11 394.784 657.630   6
   0  11  11 939.099 615.050   4
   0  12   0 19411.6 1844.83   2
   0  12   0 21037.1 1940.56   3
   0  12  -1 2857.48 986.654   3
   0  12  -1 1880.16 830.588   2
   0  12   1 4126.65 1075.82   2
   0  12   1 3802.37 1011.08   3
   0  12  -2 6043.12 1197.90   3
   0  12   2 7439.14 1277.16   3
   0  12  -2 5534.57 1080.11   2
   0  12   2 5611.90 1130.12   2
   0  12   3 1945.16 882.513   2
   0  12   3 3927.90 1004.26   3
   0  12  -3 3136.25 1074.41   3
   0  12  -3 3401.56 945.116   2
   0  12  -4 8693.67 1433.87   3
   0  12   4 6723.21 1137.92   3
   0  12  -4 5765.84 1086.82   2
   0  12   4 10266.2 1428.17   2
   0  12   5 2643.72 876.573   3
   0  12  -5 2916.60 850.776   2
   0  12   5 3251.80 986.366   2
   0  12  -5 3713.79 1195.48   3
   0  12  -6 10220.2 1389.48   2
   0  12  -6 12497.3 1641.24   3
   0  12   6 8456.20 1287.70   2
   0  12   7 5844.27 1129.99   2
   0  12  -7 6766.66 1129.53   2
   0  12   7 6214.67 1141.60   4
   0  12   8-651.853 716.774   4
   0  12   8 20.9278 650.025   2
   0  12  -8-360.989 593.322   2
   0  12   9 1260.02 646.046   4
   0  13   0 1488.57 904.585   3
   0  13   0 547.912 768.212   2
   0  13  -1 7182.43 1252.34   2
   0  13   1 7295.11 1196.06   2
   0  13   1 8980.78 1498.02   3
   0  13  -1 6994.44 1362.35   3
   0  13   2 5497.86 1250.74   3
   0  13  -2 5822.49 1259.68   3
   0  13  -2 4927.00 1150.43   2
   0  13   2 4299.42 1090.55   2
   0  13   3 1616.53 778.920   2
   0  13   3 3002.94 1091.64   3
   0  13  -3 786.410 698.691   2
   0  13  -3 2218.03 974.285   3
   0  13  -4 1494.66 825.023   2
   0  13   4 2922.72 976.772   2
   0  13  -4 3520.47 1218.62   3
   0  13  -5 7699.70 1301.10   2
   0  13   5 7618.80 1258.01   2
   0  13   6 1021.81 750.638   2
   0  13  -6-16.4855 739.910   2
   0  13  -7 836.783 754.308   2
   0  13   7 4.92756 615.203   2
  -1   0  18 24424.0 2052.75   6
  -1   0  17 411.032 654.037   6
  -1   0  16 9532.41 1260.83   6
  -1   0  15 866.379 626.314   6
  -1   0  14 24421.7 1789.18   6
  -1   0  13 947.817 644.511   6
  -1   0  12 46067.0 2245.42   6
  -1   0  11-28.2528 481.725   6
  -1   0  10 778.325 493.887   6
  -1   0   9 8.67156 532.956   6
   1   0  -9-41.9358 491.180   1
   1   0  -8 237339. 5417.40   1
  -1   0   8 232407. 5336.06   6
   1   0  -7 140.942 334.874   1
  -1   0   7-43.3706 320.116   6
  -1   0   6 75152.9 2172.78   6
   1   0  -6 76003.6 2212.86   1
  -1   0   5 274.755 285.453   6
   1   0  -5 316.295 270.050   1
  -1   0   4 204317. 4145.25   6
  -1   0   3 232.677 249.038   6
  -1   0  -3 249.488 266.653   1
  -1   0  -4 187831. 3936.87   1
  -1   0  -5 637.003 346.310   1
  -1   0  -5 201.973 82.4712   3
  -1   0  -6 84020.4 2425.85   1
  -1   0  -7 623.316 373.345   1
  -1   0  -8 63756.9 2283.68   1
  -1   0  -9 1011.09 613.845   1
  -1   0 -10 10594.1 1082.01   1
   1   0  10 10053.0 1045.77   6
   1   0  11 460.382 491.089   6
  -1   0 -11-646.182 601.191   1
   1   0  12 43870.9 2246.77   6
  -1   0 -12 43436.1 2257.60   1
  -1   0 -13 898.235 545.074   1
   1   0  13-82.7839 476.169   6
  -1   0 -14 12194.9 1374.82   1
   1   0  14 10577.5 1252.09   6
  -1   0 -15 1532.30 766.105   1
   1   0  15-419.010 519.426   6
   1   0  16 12242.6 1430.51   6
   1   0  17 414.425 564.435   6
   1   0  18 24896.3 2122.84   6
  -1   1  18 2328.18 911.099   4
  -1  -1  18 912.066 714.103   6
  -1   1  17 11404.4 1350.22   6
  -1  -1  17 12911.7 1619.94   6
  -1   1  16 9009.36 1062.54   7
  -1  -1  16 11261.6 1463.88   6
  -1   1  16 7803.48 1116.18   6
  -1  -1  15 1797.65 666.947   6
  -1   1  15 2338.58 692.994   6
  -1   1  15 1640.44 556.235   7
  -1   1  14 23805.6 1709.23   6
  -1  -1  14 21667.3 1705.77   6
  -1  -1  13 11752.6 1261.51   6
  -1   1  13 14075.5 1290.84   6
  -1   1  12 12238.2 1132.92   6
  -1  -1  12 11257.0 1214.79   6
  -1   1  11 100651. 3269.19   6
  -1  -1  11 99312.9 3413.67   6
  -1   1  10 64476.1 2369.88   6
   1  -1 -10 65178.3 2474.77   1
  -1  -1  10 65469.2 2587.05   6
   1  -1  -9 4867.04 689.097   1
  -1   1   9 3651.05 589.997   6
  -1  -1   9 4779.85 717.785   6
   1  -1  -8 1982.82 502.741   1
  -1   1   8 2068.56 515.405   6
  -1  -1   8 2446.51 597.609   6
   1   1  -7 39423.4 1653.96   1
   1  -1  -7 39744.9 1531.56   1
  -1   1   7 40707.3 1509.10   6
   1   1  -7 38388.5 853.140   2
  -1  -1   7 39383.8 1624.43   6
  -1   1   6 377923. 7243.80   6
   1   1  -6 369706. 6528.86   2
  -1  -1   6 382440. 7495.39   6
   1   1  -6 384773. 7523.23   1
   1  -1  -6 373638. 6520.66   2
  -1  -1   6 373526. 6491.18   3
   1  -1  -6 374193. 7283.26   1
  -1  -1   5 17491.0 934.892   6
  -1  -1   5 17617.1 551.912   3
   1  -1  -5 19120.8 566.980   2
  -1   1   5 18371.2 547.600   3
   1  -1  -5 19489.8 845.632   1
  -1   1   5 18272.0 825.252   6
  -1   1   4 202291. 3938.73   6
  -1  -1   4 195480. 3635.99   3
  -1   1   4 195368. 3609.72   3
   1  -1  -4 197607. 3620.92   2
   1  -1  -4 196727. 3930.98   1
  -1  -1   4 198076. 4140.22   6
  -1  -1   3 8082.26 386.279   3
  -1   1   3 9739.67 469.901   6
   1  -1  -3 8159.91 376.545   2
  -1   1   3 9114.65 374.400   3
  -1  -1   3 8590.27 565.228   6
   1  -1  -3 9306.64 387.792   3
  -1  -1   2 36724.4 1084.16   6
  -1   1   2 43283.7 988.479   6
   1  -1  -2 40711.7 1010.98   3
  -1   1   2 40732.7 1069.17   4
  -1   1   2 42209.9 952.631   1
   1  -1  -2 43124.8 1012.57   6
   1  -1   2 543.575 119.370   3
  -1  -1  -2 554.909 118.538   7
  -1   1  -2 376.514 182.552   1
   1   1   2 737.366 134.636   7
  -1  -1  -2 299.842 130.068   5
  -1  -1  -3 4453.98 400.237   5
  -1   1  -3 4229.92 276.694   3
   1  -1   3 4761.76 283.354   2
   1   1   3 4186.58 313.869   7
   1  -1   3 4498.61 267.171   3
  -1   1  -3 3959.94 415.819   1
  -1  -1  -4 30050.8 1046.06   1
  -1  -1  -4 27544.5 792.126   3
   1   1   4 30025.2 946.555   7
  -1  -1  -4 27896.3 1105.48   5
  -1   1  -4 29113.0 1123.31   1
  -1   1  -4 26768.1 778.161   3
   1  -1   4 29290.7 764.949   2
  -1  -1  -5 4368.16 477.632   1
  -1   1  -5 3481.15 239.215   3
   1   1   5 3243.67 342.179   7
  -1   1  -5 3674.79 473.929   1
  -1  -1  -5 3505.79 256.374   3
   1  -1   5 3379.79 228.701   2
  -1  -1  -6 76318.9 1419.80   3
  -1  -1  -6 77374.2 2105.65   1
  -1   1  -6 76897.0 2218.79   1
   1   1   6 73894.7 1349.21   2
  -1   1  -6 75952.7 1399.90   3
  -1  -1  -7 90532.0 1760.01   3
  -1   1  -7 90303.0 1775.41   3
  -1   1  -7 92642.7 2780.03   1
  -1  -1  -7 88922.4 2612.90   1
  -1  -1  -8 1671.07 476.409   1
  -1   1  -8 2356.77 584.803   1
  -1  -1  -9 31585.9 1656.51   1
   1   1   9 35946.3 1680.33   6
  -1   1  -9 33178.2 1762.86   1
   1   1  10 30034.3 1630.71   6
  -1   1 -10 30558.1 1781.23   1
  -1  -1 -10 29778.5 1671.31   1
   1  -1  10 31809.9 1814.73   6
   1   1  10 31437.4 1433.66   7
  -1   1 -11 51090.1 2449.97   1
   1  -1  11 51761.3 2410.78   6
  -1  -1 -11 50990.0 2305.37   1
   1   1  11 49606.6 1969.02   7
   1   1  11 57000.8 2358.08   6
   1   1  12 8264.92 999.321   6
   1   1  12 6986.54 736.559   7
   1  -1  12 6052.66 915.087   6
  -1  -1 -12 7151.52 966.549   1
  -1   1 -12 8913.99 1115.29   1
   1  -1  13 8905.83 1171.71   6
  -1  -1 -13 10787.0 1225.86   1
   1   1  13 9714.25 915.496   7
  -1   1 -13 11679.8 1302.79   1
   1   1  13 10203.4 1108.87   6
   1   1  14 31107.6 1974.82   6
  -1   1 -14 30486.7 2129.42   1
   1  -1  14 33230.4 2148.02   6
   1   1  14 29166.3 1647.06   7
  -1  -1 -14 31065.2 2059.67   1
  -1   1 -15 1067.84 620.520   1
   1   1  15 965.826 705.049   6
   1  -1  15 817.516 667.294   6
  -1  -1 -15 405.434 673.411   1
   1  -1  16 18829.1 1796.72   6
  -1  -1 -16 21548.7 1935.78   1
   1   1  16 15592.7 1539.80   6
   1  -1  17 8088.21 1296.31   6
   1   1  17 9127.91 1311.60   6
   1  -1  18 1994.43 940.338   6
  -1   2  18 373.432 561.040   4
  -1  -2  17 4534.59 1084.77   6
  -1   2  17 8122.71 1358.08   4
  -1   2  16 664.885 536.855   7
  -1  -2  16 97.0844 613.032   6
  -1   2  16 1125.72 777.106   4
  -1   2  15 38403.8 2483.74   4
  -1   2  15 35884.7 2102.19   6
  -1  -2  15 34453.0 2339.21   6
  -1   2  15 34088.7 2013.01   7
  -1   2  14 672.411 426.768   7
  -1  -2  14 1679.45 749.581   6
  -1   2  14 308.805 451.813   6
  -1   2  13 2388.93 615.913   7
  -1  -2  13 1337.95 659.609   6
  -1   2  13 1871.07 588.067   6
  -1   2  12 3413.76 677.880   6
  -1   2  12 3642.88 673.227   7
  -1  -2  12 4167.68 852.490   6
  -1  -2  11 47373.8 2303.70   6
  -1   2  11 47661.8 2088.02   7
  -1   2  11 45232.0 2004.14   6
   1  -2 -10 24208.7 1400.18   1
  -1  -2  10 24564.0 1584.03   6
  -1   2  10 23146.1 1331.03   6
  -1   2  10 25373.5 1443.21   7
   1  -2  -9 95483.0 2906.90   1
  -1   2   9 96589.2 2837.77   6
  -1  -2   9 101175. 3213.92   6
  -1   2   9 100413. 3005.39   7
  -1   2   8 17433.9 983.934   6
  -1  -2   8 16106.0 1159.51   6
  -1  -2   8 14724.1 534.798   3
   1  -2  -8 16102.6 1003.98   1
   1   2  -8 15792.8 582.094   2
  -1   2   8 16173.4 569.040   3
  -1   2   7 971.424 190.057   3
   1  -2  -7 1642.11 412.733   1
   1   2  -7 1546.16 226.070   2
  -1  -2   7 2139.87 563.004   6
  -1   2   7 1138.53 367.025   6
  -1  -2   6 394.203 361.950   6
  -1   2   6 24.6061 243.954   6
   1   2  -6 170.659 188.100   2
  -1   2   6 336.239 188.637   3
   1  -2  -6-15.8757 227.612   1
  -1   2   5 65451.7 1688.77   6
   1  -2  -5 60314.1 1662.60   1
  -1   2   5 67422.1 1989.90   7
  -1   2   5 64823.3 1565.69   3
   1   2  -5 60976.1 1557.11   2
  -1  -2   5 64843.8 2026.84   6
  -1   2   5 68643.0 2049.15   4
  -1   2   4 115340. 2493.00   3
  -1  -2   4 114640. 2848.02   6
  -1   2   4 122613. 2493.21   6
   1  -2  -4 115949. 2457.39   1
  -1   2   4 119576. 2850.60   4
  -1   2   4 119686. 2876.97   7
  -1   2   3 66019.7 1396.12   6
  -1  -2   3 60652.7 1718.73   6
  -1   2   3 67000.4 1807.43   7
  -1   2   3 65727.0 1716.27   4
  -1   2   3 63046.9 1547.40   3
  -1   2   3 60434.3 1334.67   1
   1  -2  -3 62660.3 1428.85   6
  -1   2   2 272393. 5038.94   2
  -1   2   2 270327. 5219.45   7
  -1   2   2 271426. 4736.70   6
  -1  -2   2 275025. 5124.65   6
  -1   2   2 275615. 4716.83   5
   1  -2  -2 266261. 4736.53   6
  -1   2   2 271075. 5033.03   3
  -1   2   2 255261. 5037.94   4
  -1   2   1 364466. 6480.69   2
  -1   2   1 338070. 6395.18   4
  -1   2   1 371230. 6548.73   7
   1  -2  -1 333857. 6211.93   6
  -1   2   1 374159. 6491.83   3
  -1  -2   1 340353. 6372.52   6
   1   2  -1 363479. 6525.09   3
   1   2   0 7662.97 345.545   6
  -1   2   0 7541.59 439.707   2
   1   2   0 8451.13 481.120   3
  -1   2   0 6177.65 257.442   1
   1   2   0 8249.96 464.832   4
  -1   2   0 7499.86 431.047   3
  -1   2   0 7775.39 423.584   7
   1  -2   1 505625. 8950.83   1
   1   2   1 519958. 9124.78   3
   1   2   1 518947. 8729.79   6
  -1   2  -1 538340. 8949.70   1
  -1   2  -1 514398. 9097.58   3
   1   2   1 511028. 9180.26   4
  -1   2  -1 519672. 9065.89   2
  -1  -2  -2 395652. 7202.22   5
   1   2   2 402306. 7523.65   4
  -1   2  -2 393041. 7215.42   2
  -1   2  -2 407584. 7298.41   1
   1   2   2 411458. 7327.21   7
  -1   2  -2 391526. 7248.35   3
   1   2   3 140514. 2971.24   7
  -1   2  -3 131945. 2842.24   3
  -1  -2  -3 133511. 2908.76   5
  -1   2  -3 135939. 2815.41   2
   1   2   3 145832. 3317.64   4
  -1   2  -3 138669. 3053.29   1
   1   2   4 153082. 3749.06   4
  -1   2  -4 148873. 3158.53   3
  -1  -2  -4 158503. 3413.45   5
   1   2   4 159472. 3367.56   7
   1   2   4 154446. 3161.87   2
  -1   2  -4 155932. 3524.74   1
   1   2   5 315406. 5867.11   2
  -1   2  -5 317389. 6482.00   1
  -1  -2  -5 318143. 6341.46   5
  -1  -2  -5 320632. 6185.02   1
   1   2   5 317558. 6233.88   7
  -1   2  -5 313443. 5888.19   3
   1   2   6 3143.49 302.534   2
  -1   2  -6 4402.67 615.711   1
  -1   2  -6 2884.38 303.234   3
   1   2   6 3949.67 448.811   7
  -1  -2  -6 3632.44 469.450   1
  -1   2  -7 52693.0 2046.32   1
   1   2   7 51864.4 1753.34   7
   1   2   7 51567.8 1308.88   2
  -1  -2  -7 51459.4 1804.36   1
  -1   2  -7 53648.2 1383.58   3
   1   2   8 48300.4 1746.76   7
  -1  -2  -8 44964.0 1176.76   3
  -1   2  -8 47034.7 1225.50   3
   1   2   8 45603.5 1131.11   2
  -1  -2  -8 47103.6 1812.01   1
  -1   2  -8 48526.3 2065.47   1
  -1   2  -9 132126. 3919.02   1
   1   2   9 129817. 3518.77   6
   1   2   9 127617. 3407.09   7
  -1  -2  -9 128099. 3603.32   1
   1   2  10 15675.5 1047.86   7
   1   2  10 17155.9 1168.36   6
  -1  -2 -10 15387.0 1166.56   1
  -1   2 -10 15999.4 1382.57   1
   1  -2  10 15280.6 1298.17   6
   1  -2  11 125543. 4078.74   6
  -1  -2 -11 120304. 3769.75   1
   1   2  11 118380. 3459.53   7
   1   2  11 123644. 3695.60   6
  -1   2 -11 119511. 4048.89   1
   1  -2  12 716.667 656.476   6
   1   2  12 2555.35 521.648   7
   1   2  12 2247.41 661.876   6
  -1   2 -12 2416.29 796.287   1
  -1  -2 -12 1798.98 587.290   1
   1  -2  13 362.307 660.398   6
  -1  -2 -13 318.212 537.033   1
   1   2  13 170.294 404.157   7
   1   2  13 910.336 609.626   6
  -1   2 -13 1083.28 699.741   1
  -1  -2 -14 398.130 555.150   1
  -1   2 -14 114.889 590.772   1
   1   2  14 184.777 364.223   7
   1   2  14-261.201 482.799   6
   1  -2  14-133.362 685.917   6
  -1  -2 -15 20497.3 1746.45   1
   1  -2  15 21548.3 1844.04   6
   1   2  15 18553.8 1556.83   6
   1   2  16 1342.61 927.290   4
   1  -2  16 1273.14 741.099   6
  -1  -2 -16-157.398 599.302   1
   1   2  17 3622.69 1004.70   4
   1  -2  17 1115.33 811.934   6
  -1   3  18-539.677 682.399   4
  -1   3  17 7727.26 1261.50   4
  -1  -3  17 9855.11 1454.32   6
  -1   3  16 3349.02 937.429   4
  -1   3  16 3375.69 735.430   7
  -1  -3  16 2786.64 972.820   6
  -1  -3  15 2572.00 808.510   6
  -1   3  15 2396.05 679.088   7
  -1   3  15 2179.83 791.364   4
  -1   3  14 382.221 481.863   7
  -1   3  14 1564.02 701.495   4
  -1  -3  14-160.283 538.292   6
  -1  -3  13 61315.4 2945.20   6
  -1   3  13 66952.9 3052.15   4
  -1   3  13 61233.9 2494.60   6
  -1   3  13 60394.5 2629.67   7
  -1   3  12 7926.72 872.294   6
  -1   3  12 9042.17 954.543   7
  -1   3  12 7153.91 999.700   4
  -1  -3  12 6171.40 956.361   6
  -1   3  11 11367.5 1033.14   7
  -1  -3  11 13201.9 1273.38   6
  -1   3  11 13819.4 1258.58   4
  -1   3  11 10403.7 898.319   6
  -1  -3  10 183.541 563.681   6
  -1   3  10 442.294 383.665   7
  -1   3  10 827.977 407.838   6
  -1   3  10 498.602 461.814   4
  -1   3   9 17755.3 1192.53   7
  -1   3   9 17656.5 1022.19   6
  -1   3   9 20467.9 1368.61   4
  -1  -3   9 17923.8 1348.36   6
   1  -3  -9 19039.7 1110.34   1
   1   3  -9 19685.2 794.949   2
   1   3  -8 893.318 285.909   2
  -1   3   8 1251.21 358.111   6
  -1   3   8 268.287 373.176   7
  -1   3   8 781.783 243.704   3
   1  -3  -8 439.764 337.532   1
  -1  -3   8 1616.20 605.345   6
  -1   3   8 812.859 469.397   4
  -1   3   7 120024. 2718.89   3
  -1   3   7 114790. 3258.15   7
   1  -3  -7 113589. 2853.02   1
   1   3  -7 115660. 2715.87   2
  -1  -3   7 119427. 3391.31   6
  -1   3   7 117351. 2825.80   6
  -1   3   7 126514. 3433.90   4
  -1   3   6 5065.93 430.816   6
  -1   3   6 6107.55 646.651   4
  -1  -3   6 5873.53 719.165   6
  -1   3   6 6090.67 482.570   3
   1  -3  -6 4546.84 456.632   1
   1   3  -6 4874.64 449.953   2
  -1   3   6 4707.49 600.440   7
  -1   3   5-343.200 240.131   2
   1  -3  -5 241.228 192.411   1
  -1   3   5 369.197 249.229   3
   1   3  -5 362.436 269.309   2
  -1  -3   5 438.126 439.132   6
  -1   3   5-43.8633 258.778   4
  -1   3   5 188.048 167.524   6
  -1   3   5 73.5378 275.428   7
  -1   3   4 14741.4 521.896   6
  -1   3   4 15684.8 907.708   7
  -1   3   4 16134.2 858.393   4
   1   3  -4 16043.0 770.381   2
  -1  -3   4 14519.6 859.697   6
   1   3  -4 13387.4 760.346   3
  -1   3   4 14329.4 719.669   2
  -1   3   4 14520.0 730.444   3
  -1   3   3 521416. 9022.99   6
   1   3  -3 523184. 9587.24   2
  -1   3   3 502588. 9649.88   4
  -1   3   3 518063. 9103.89   5
  -1   3   3 526592. 9551.20   2
  -1  -3   3 530406. 9689.19   6
  -1   3   3 520935. 9822.76   7
   1   3  -3 517260. 9624.50   3
   1  -3  -3 553669. 9034.27   6
  -1   3   3 535643. 9570.63   3
  -1   3   2 16429.4 839.327   7
   1   3  -2 16193.3 816.281   2
  -1   3   2 16045.4 786.732   3
  -1   3   2 16466.9 784.909   4
  -1  -3   2 15738.2 755.569   6
   1   3  -2 16442.6 834.922   3
   1  -3  -2 18003.3 457.689   6
  -1   3   2 16835.4 791.398   2
  -1   3   2 16594.5 470.732   5
  -1  -3   1 1166.19 260.317   6
  -1   3   1 1255.00 324.902   7
   1   3  -1 1029.41 400.484   2
  -1   3   1 642.950 305.350   2
  -1   3   1 885.637 239.719   4
   1   3  -1 1730.66 385.029   3
  -1   3   1 1171.45 336.363   3
   1   3   0 55.2556 252.955   4
  -1  -3   0 146.973 168.319   6
   1  -3   0 117.674 128.226   1
  -1   3   0 265.058 257.616   7
  -1   3   0 419.064 348.762   2
  -1   3   0 399.241 304.905   3
  -1   3   0 81.0647 132.876   1
   1   3   0 740.273 391.048   2
   1   3   0 849.972 348.808   3
  -1   3  -1 52899.7 1587.17   2
  -1  -3  -1 57055.7 1199.98   6
   1   3   1 56523.9 1661.35   2
   1   3   1 59012.0 1229.33   6
   1   3   1 58679.7 1692.97   4
   1   3   1 52783.0 1626.64   3
  -1   3  -1 56084.6 1382.04   1
  -1   3  -1 53495.0 1622.39   3
   1   3   2 4101.90 465.801   4
   1   3   2 4248.18 493.921   2
   1   3   2 3875.87 185.915   6
  -1   3  -2 3975.78 426.594   2
  -1  -3  -2 3939.99 350.764   5
   1   3   2 4028.14 451.776   3
  -1   3  -2 4123.46 432.303   3
  -1   3  -2 4422.34 408.001   1
  -1   3  -3 979039. 17322.6   3
  -1   3  -3 999999. 17374.8   1
   1   3   3 998618. 17335.1   2
  -1   3  -3 956642. 17243.2   2
   1   3   3 997050. 17456.0   7
   1   3   3 980065. 17304.8   3
  -1  -3  -3 974816. 17146.0   5
  -1   3  -4 17057.8 816.504   3
  -1   3  -4 18832.0 956.414   1
  -1   3  -4 16679.4 786.367   2
   1   3   4 17730.1 838.350   2
   1   3   4 17794.5 911.844   7
  -1  -3  -4 17456.8 821.543   5
  -1   3  -5 1065.78 319.319   3
  -1   3  -5 1232.68 267.921   2
   1   3   5 1100.92 335.301   7
  -1   3  -5 1671.81 432.625   1
  -1  -3  -5 1327.77 327.399   1
  -1  -3  -5 776.153 315.765   5
   1   3   5 1560.16 478.691   4
   1   3   5 753.845 284.344   2
   1   3   6 216.082 325.101   7
  -1   3  -6 689.022 455.276   1
   1   3   6-250.590 424.797   4
   1   3   6 99.4113 227.523   2
  -1  -3  -6 413.539 299.919   1
  -1   3  -6 246.199 262.352   3
  -1   3  -7 307022. 6764.73   1
   1   3   7 283426. 6962.29   4
  -1   3  -7 310049. 5997.70   3
  -1  -3  -7 305311. 6265.20   1
   1   3   7 306325. 6451.33   7
   1   3   7 302700. 5887.20   2
   1   3   8 197.689 229.777   2
   1   3   8 521.715 375.909   7
   1   3   8-196.419 537.152   4
   1   3   8 167.395 322.945   6
  -1   3  -8-35.9589 588.739   1
  -1   3  -8 71.4403 246.780   3
  -1  -3  -8-54.4553 331.979   1
   1   3   9 146964. 3158.47   2
   1   3   9 139907. 4551.43   4
   1   3   9 156740. 3859.67   6
  -1   3  -9 160227. 3327.82   3
  -1  -3  -9 154326. 3999.93   1
   1   3   9 152219. 4000.51   7
  -1   3  -9 151400. 4424.13   1
   1  -3   9 160639. 4541.94   6
   1   3  10 35.6740 349.133   6
  -1   3 -10 85.5158 617.921   1
   1  -3  10 402.061 593.438   6
   1   3  10-598.385 383.141   7
   1   3  10 366.593 560.541   4
  -1  -3 -10 935.763 482.375   1
   1   3  11 1647.86 752.662   4
  -1  -3 -11 1855.18 581.447   1
   1   3  11 1515.82 516.605   6
   1  -3  11-227.657 519.526   6
   1   3  11 1828.34 510.122   7
  -1   3 -11 2538.45 937.502   1
   1   3  12 132.714 305.053   7
   1  -3  12-367.227 656.112   6
  -1  -3 -12 1029.61 587.611   1
   1   3  12 139.972 375.299   6
   1   3  12 1060.61 748.293   4
  -1   3 -12 571.997 606.752   1
   1   3  13 55495.4 3038.64   4
   1   3  13 58495.9 2453.82   6
   1   3  13 56359.7 2410.31   7
   1  -3  13 60142.4 2946.09   6
  -1   3 -13 57813.8 2967.90   1
  -1  -3 -13 55616.8 2590.32   1
  -1  -3 -14 3566.49 795.506   1
   1   3  14 4967.78 1028.81   4
   1  -3  14 3459.59 980.703   6
   1   3  14 2782.90 573.086   7
  -1   3 -14 3971.13 919.720   1
   1  -3  15 2704.22 904.962   6
   1   3  15 5018.35 1115.50   4
  -1  -3 -15 3552.49 883.808   1
   1   3  16 379.311 577.438   4
   1  -3  16 576.312 701.457   6
   1   3  17 4293.40 1034.43   4
   1  -3  17 6143.91 1284.15   6
  -1   4  17 2285.06 780.265   4
  -1   4  16 553.659 630.974   4
  -1   4  16 496.339 463.253   7
  -1  -4  15 19012.7 1813.37   6
  -1   4  15 15234.2 1434.11   7
  -1   4  15 18183.7 1666.68   4
  -1   4  14 3888.38 910.597   4
  -1   4  14 3271.46 735.127   7
  -1  -4  14 2652.68 771.164   6
  -1   4  13 593.297 433.821   7
  -1   4  13-157.463 457.538   4
  -1  -4  12 2600.17 835.165   6
  -1   4  12 2111.95 562.951   7
  -1   4  12 1298.71 512.927   4
  -1  -4  11 26349.2 1794.73   6
  -1   4  11 27827.8 1769.60   4
  -1   4  11 22176.5 1488.79   7
  -1   4  10 46250.0 1703.45   6
  -1  -4  10 46881.3 2307.85   6
  -1   4  10 47309.0 2240.28   4
  -1   4  10 42856.9 2057.31   7
  -1   4   9 13575.7 823.063   6
  -1   4   9 13486.1 1128.11   7
   1   4  -9 14859.2 818.998   2
  -1  -4   9 12309.4 1152.89   6
  -1   4   9 14602.4 793.049   3
  -1   4   9 15471.7 1211.23   4
  -1  -4   8 154235. 4272.71   6
  -1   4   8 143863. 3314.90   6
  -1   4   8 150757. 3451.11   3
   1   4  -8 145873. 3458.34   2
  -1   4   8 149056. 4133.16   4
   1  -4  -8 145194. 3439.02   1
  -1   4   8 144743. 4058.19   7
   1  -4  -7 1557.68 338.064   1
  -1  -4   7 729.666 537.625   6
  -1   4   7 1352.54 480.058   7
  -1   4   7 1508.57 358.839   3
  -1   4   7 1500.75 300.712   6
   1   4  -7 1425.51 371.501   2
  -1   4   7 1413.73 441.342   4
  -1   4   6 19550.5 952.452   2
  -1  -4   6 18866.8 1197.45   6
   1  -4  -6 18021.6 754.582   1
  -1   4   6 21464.5 1210.89   4
  -1   4   6 19254.2 1185.42   7
  -1   4   6 19299.7 977.253   3
   1   4  -6 18113.1 948.366   2
  -1   4   6 18964.2 703.908   6
  -1   4   5 121569. 3293.17   7
  -1   4   5 124426. 3219.98   4
   1   4  -5 120141. 2945.69   2
  -1  -4   5 125306. 3242.19   6
   1   4  -5 119474. 3013.85   3
  -1   4   5 121435. 2917.51   2
  -1   4   5 121329. 2947.96   3
  -1   4   5 109579. 2305.62   6
  -1   4   4 272700. 3870.43   3
  -1   4   4 268317. 4286.61   7
   1   4  -4 260704. 3947.71   3
  -1   4   4 263344. 3806.76   2
   1   4  -4 268204. 3870.78   2
  -1   4   4 270778. 4063.48   4
  -1  -4   4 269183. 4024.49   6
  -1   4   3 377.159 339.181   2
   1   4  -3 115.827 295.336   3
  -1   4   3-112.044 299.686   7
  -1   4   3 135.376 120.159   5
   1   4  -3-262.875 342.981   2
  -1   4   3 76.8628 278.035   3
  -1   4   3 229.694 253.654   4
  -1  -4   3 5.15979 297.716   6
  -1   4   2 256335. 5437.07   7
   1   4  -2 254476. 5395.30   3
  -1   4   2 256373. 5306.97   2
  -1  -4   2 254245. 5113.21   6
   1  -4  -2 256526. 4506.35   5
  -1   4   2 257415. 5315.54   3
   1  -4  -2 259127. 4460.06   6
   1   4  -2 250610. 5315.92   2
  -1   4   2 252506. 5285.54   4
   1  -4  -1 85641.6 1658.09   1
  -1   4   1 85293.9 2336.48   2
  -1   4   1 85978.5 2359.33   3
  -1   4   1 83811.6 2303.46   4
   1   4  -1 82338.6 2390.20   3
   1   4  -1 84100.6 2367.30   2
   1  -4  -1 89417.3 1706.92   5
  -1  -4   1 87922.1 2085.35   6
  -1   4   1 83175.7 2373.53   7
  -1  -4   0 770.632 203.066   6
   1   4   0 811.569 398.481   3
   1   4   0 929.749 393.880   2
   1  -4   0 778.818 166.575   1
  -1   4   0 487.804 373.309   2
  -1   4   0 274.079 308.267   3
   1   4   0 766.713 323.749   4
  -1   4  -1 93530.8 2449.98   2
  -1   4  -1 86606.9 2436.98   3
   1   4   1 91984.4 2491.05   2
   1   4   1 94091.9 2537.42   4
   1   4   1 89328.2 2491.98   3
   1   4   1 91777.9 1869.55   6
  -1  -4  -1 91340.9 1829.50   6
  -1   4  -1 90415.8 2079.22   1
   1   4   2 88923.6 2440.21   3
  -1   4  -2 88661.3 2386.00   2
  -1   4  -2 88028.1 2182.21   1
   1   4   2 97321.9 2592.77   4
   1   4   2 89289.1 2468.48   2
   1   4   2 87233.8 1680.68   6
  -1   4  -2 88475.1 2443.50   3
  -1  -4  -2 96303.1 2189.15   5
   1   4   3 9241.36 715.924   2
  -1   4  -3 10639.0 742.734   3
   1   4   3 12436.0 874.362   4
   1   4   3 9921.42 766.786   7
  -1   4  -3 10812.4 693.078   1
  -1   4  -3 10032.2 693.860   2
   1   4   3 10725.4 753.543   3
  -1  -4  -3 10138.6 596.586   5
   1   4   4 70724.3 2201.36   7
  -1   4  -4 67645.5 2080.66   1
   1   4   4 71120.5 2082.76   3
  -1   4  -4 68169.9 2063.42   3
  -1  -4  -4 70406.1 1910.94   5
  -1   4  -4 65841.0 1971.91   2
   1   4   4 70947.4 2127.65   2
   1   4   4 65548.0 1439.82   6
   1   4   4 76457.6 2438.50   4
  -1   4  -5 340694. 6717.79   2
   1   4   5 365517. 7487.20   4
   1   4   5 353428. 6819.46   2
   1   4   5 350448. 7136.79   7
  -1   4  -5 350037. 6884.85   3
  -1   4  -5 348825. 7079.85   1
  -1  -4  -5 352615. 6800.22   5
  -1   4  -6 775.686 368.242   3
  -1   4  -6 729.002 414.680   1
  -1  -4  -6 680.834 352.793   5
   1   4   6 490.213 195.856   6
  -1   4  -6 689.399 357.880   2
   1   4   6 802.967 363.967   2
   1   4   6 72.5056 337.583   7
   1   4   6 1258.53 535.963   4
  -1  -4  -6 735.370 294.241   1
  -1   4  -7 15288.4 1143.91   1
   1   4   7 15048.3 1214.18   4
   1   4   7 13947.6 1036.84   7
  -1   4  -7 13728.4 873.775   3
  -1  -4  -7 15029.5 882.514   1
   1   4   7 14398.4 767.852   6
   1   4   7 14541.9 860.474   2
  -1   4  -8 41746.3 2006.06   1
   1   4   8 39953.1 1431.27   6
   1   4   8 41216.4 2094.06   4
  -1   4  -8 38998.5 1487.93   3
   1   4   8 37748.2 1747.46   7
   1   4   8 38647.8 1408.57   2
  -1  -4  -8 38195.1 1549.53   1
   1  -4   9 42231.3 2144.82   6
   1   4   9 40392.1 2149.40   4
  -1  -4  -9 36626.8 1634.13   1
  -1   4  -9 40174.9 1495.53   3
   1   4   9 40792.6 1528.36   6
   1   4   9 38273.8 1372.90   2
   1   4   9 38367.1 1794.85   7
  -1   4  -9 42994.8 2113.19   1
   1   4  10 3001.71 761.530   4
   1   4  10 2651.63 599.835   7
  -1  -4 -10 3076.32 576.501   1
   1   4  10 2275.70 446.368   6
   1  -4  10 3472.39 780.381   6
  -1   4 -10 2455.13 655.672   1
   1   4  11 37848.3 2262.93   4
   1  -4  11 40662.6 2291.19   6
  -1   4 -11 36903.8 2194.61   1
   1   4  11 38392.8 1904.59   7
  -1  -4 -11 38004.4 1852.03   1
   1  -4  12 16213.8 1549.65   6
  -1   4 -12 16947.2 1586.48   1
   1   4  12 16506.7 1579.24   4
   1   4  12 15753.3 1260.93   7
  -1  -4 -12 16266.6 1299.76   1
   1   4  13 856.914 648.320   4
   1  -4  13 660.070 652.255   6
  -1  -4 -13 1487.42 548.803   1
   1   4  13 423.452 407.791   7
   1   4  14 9737.32 1325.87   4
  -1  -4 -14 11701.6 1200.23   1
   1  -4  14 11526.2 1410.16   6
   1   4  14 8336.89 985.566   7
   1   4  15 10873.1 1444.24   4
   1  -4  15 11708.8 1535.96   6
   1   4  16 992.942 700.553   4
   1  -4  16-94.7360 779.138   6
   1   4  17 1723.39 739.024   4
  -1   5  17 5867.09 1055.36   4
  -1  -5  16 7827.66 1274.55   6
  -1   5  16 4797.45 911.675   7
  -1   5  16 7372.86 1152.63   4
  -1   5  15 37.9378 537.653   4
  -1   5  15 441.740 480.221   7
  -1  -5  15 848.421 827.664   6
  -1  -5  14 5488.50 1071.75   6
  -1   5  14 5013.04 931.363   4
  -1   5  14 4705.24 860.399   7
  -1   5  13 3723.25 820.813   4
  -1  -5  13 3712.55 925.919   6
  -1   5  13 2865.63 692.010   7
  -1   5  12 22526.2 1667.67   4
  -1  -5  12 23016.3 1826.76   6
  -1   5  12 22395.2 1614.04   7
  -1   5  11 20164.6 1514.28   4
  -1  -5  11 18892.2 1589.11   6
  -1   5  11 17381.3 1374.93   7
  -1  -5  10 78721.5 3132.40   6
  -1   5  10 74331.3 2953.30   7
  -1   5  10 80328.8 3079.17   4
   1   5  -9 181.265 322.052   2
  -1   5   9 21.4668 380.170   4
  -1   5   9 306.132 337.532   3
  -1   5   9 369.826 385.907   7
  -1  -5   9 1304.16 578.673   6
  -1   5   8 3791.91 695.793   4
   1   5  -8 4083.64 601.456   2
  -1   5   8 3358.13 678.725   7
  -1   5   8 3344.61 515.274   3
  -1  -5   8 2937.77 720.876   6
  -1  -5   7-735.238 500.771   6
  -1   5   7 45.2712 130.846   6
  -1   5   7 262.878 357.183   3
  -1   5   7-102.074 442.999   7
  -1   5   7 365.578 384.281   2
  -1   5   7-94.4095 402.820   4
   1   5  -7-195.796 359.408   2
  -1   5   6 192599. 4906.49   7
  -1   5   6 193171. 4794.36   4
  -1   5   6 189773. 3545.01   6
  -1   5   6 195090. 4484.51   3
   1   5  -6 189586. 4464.44   2
   1   5  -6 184613. 4516.03   3
  -1   5   6 184982. 4383.06   2
  -1  -5   6 193094. 4764.99   6
   1   5  -5 25146.7 1271.23   2
   1   5  -5 25567.5 1351.11   3
  -1   5   5 25045.2 1243.60   2
  -1  -5   5 26611.3 1372.32   6
  -1   5   5 26599.7 1476.43   7
  -1   5   5 25198.4 1248.35   3
  -1   5   5 28210.5 1397.27   4
  -1   5   4 206659. 4686.80   3
  -1  -5   4 203874. 4663.97   6
  -1   5   4 208802. 4804.87   4
  -1   5   4 200512. 4924.83   7
   1   5  -4 201345. 4766.99   3
  -1   5   4 200516. 4618.56   2
   1   5  -4 197968. 4653.55   2
  -1   5   3 22552.1 1150.63   4
  -1  -5   3 19120.2 1007.69   6
   1  -5  -3 20482.1 638.977   5
  -1   5   3 19639.9 1101.37   3
  -1   5   3 20671.0 1127.89   2
   1   5  -3 18992.9 1101.46   2
   1   5  -3 20134.0 1185.21   3
  -1   5   3 19452.9 1161.74   7
  -1  -5   2 5039.13 533.267   6
  -1   5   2 4963.31 568.954   4
   1   5  -2 5144.34 630.628   2
   1   5  -2 4503.20 636.053   3
   1  -5  -2 6042.73 239.934   6
   1  -5  -2 5010.76 257.711   5
  -1   5   2 5026.18 605.991   7
  -1   5   2 4999.79 641.893   3
  -1   5   2 5636.28 622.064   2
   1   5  -1 158.040 441.135   3
   1  -5  -1 223.293 100.520   1
   1  -5  -1 325.923 128.650   5
  -1   5   1 759.798 344.078   4
  -1   5   1 424.528 355.480   3
  -1  -5   1 604.551 241.728   6
  -1   5   1 1029.90 454.815   2
   1   5   0 395615. 8018.97   2
   1   5   0 393807. 8087.97   3
  -1   5   0 396418. 8014.39   3
  -1   5   0 393994. 7973.47   2
  -1  -5   0 404237. 7274.40   6
  -1   5  -1 14557.8 958.930   3
  -1   5  -1 16725.3 1017.71   2
   1   5   1 15351.3 999.770   2
   1   5   1 15629.2 1030.14   3
   1   5   1 16438.2 1020.05   4
  -1  -5  -1 15291.4 532.774   6
   1   5   2 49148.4 1867.06   4
  -1  -5  -2 50858.9 1489.90   5
  -1   5  -2 45509.5 1781.11   3
   1   5   2 46984.2 1788.38   2
  -1   5  -2 43160.6 1709.82   2
   1   5   2 47254.9 1810.40   3
   1   5   3 13556.6 929.668   3
  -1   5  -3 12448.4 914.711   3
   1   5   3 11366.9 901.660   4
   1   5   3 11574.0 883.436   2
  -1   5  -3 11339.0 812.549   2
  -1  -5  -3 10821.0 629.018   5
  -1   5  -4 38190.3 1532.92   1
  -1   5  -4 38217.6 1635.68   3
   1   5   4 37745.3 1678.69   7
  -1   5  -4 36016.5 1536.68   2
   1   5   4 40056.8 1623.65   3
   1   5   4 41543.0 1812.54   4
  -1  -5  -4 40041.4 1352.20   5
   1   5   4 40430.7 1622.00   2
  -1   5  -5 13596.7 943.286   3
   1   5   5 15609.4 1007.00   3
  -1   5  -5 13086.9 879.808   2
   1   5   5 12010.5 970.477   7
   1   5   5 14752.1 1103.86   4
  -1   5  -5 14133.7 987.369   1
   1   5   5 13395.1 938.953   2
  -1  -5  -5 13833.8 827.090   5
  -1  -5  -6 91695.5 2595.76   5
  -1   5  -6 88282.6 2831.52   1
   1   5   6 87877.8 2874.73   7
   1   5   6 84755.9 1785.04   6
  -1  -5  -6 91252.2 2293.93   1
  -1   5  -6 86903.2 2542.28   2
   1   5   6 94204.2 3159.48   4
   1   5   6 91957.9 2654.90   2
  -1   5  -6 87997.7 2693.47   3
  -1   5  -7 908.519 411.532   2
  -1  -5  -7 720.229 295.357   1
   1   5   7 1392.48 475.396   2
   1   5   7 538.204 182.162   6
  -1   5  -7 536.079 437.043   3
   1   5   7 595.588 438.924   4
   1   5   7 1141.80 447.779   7
  -1   5  -7 1028.64 548.688   1
   1   5   8 2223.57 666.883   4
   1  -5   8 1281.07 593.895   6
  -1   5  -8 770.483 396.259   3
  -1   5  -8 878.907 550.381   1
   1   5   8 1214.21 528.578   7
   1   5   8 1582.26 409.489   2
  -1  -5  -8 1999.91 441.951   1
  -1   5  -9 235.694 375.026   3
   1   5   9 1176.73 599.850   4
  -1  -5  -9 282.168 313.242   1
   1  -5   9 730.636 636.352   6
   1   5   9 572.901 326.028   2
  -1   5  -9 1044.80 771.803   1
   1   5   9 1259.91 535.988   7
  -1  -5 -10 37401.3 1687.53   1
   1   5  10 36376.7 2157.22   4
  -1   5 -10 35234.6 2102.69   1
   1  -5  10 41234.9 2238.69   6
   1   5  10 38332.2 1972.82   7
   1   5  11 13906.6 1358.02   4
   1  -5  11 11371.6 1259.79   6
   1   5  11 11183.0 1098.43   7
  -1  -5 -11 11091.8 959.343   1
   1   5  12 254.330 382.719   7
   1  -5  12 350.902 595.651   6
   1   5  12 264.238 571.350   4
   1  -5  13 1259.98 768.084   6
   1   5  13 196.721 372.788   7
   1   5  13 1193.86 597.476   4
   1  -5  14 15094.1 1577.22   6
   1   5  14 13266.7 1274.28   7
   1   5  14 15808.6 1712.62   4
   1   5  15 683.484 721.037   4
   1  -5  15-417.932 670.487   6
   1  -5  16 14828.8 1708.57   6
   1   5  16 16089.1 1800.34   4
  -1   6  16 3615.86 878.233   7
  -1   6  16 3293.79 867.408   4
  -1  -6  15 3794.59 1019.38   6
  -1   6  15 1073.69 611.624   4
  -1   6  15 4275.86 909.308   7
  -1   6  14 5609.44 931.771   7
  -1  -6  14 5127.44 987.565   6
  -1   6  14 5964.09 1011.76   4
  -1  -6  13 151.253 692.104   6
  -1   6  13 429.408 472.299   4
  -1   6  13 311.255 575.118   7
  -1   6  12 24462.4 1799.65   4
  -1  -6  12 24320.1 1917.18   6
  -1   6  12 26160.7 1819.82   7
  -1  -6  11 13751.6 1434.06   6
  -1   6  11 12579.4 1277.25   7
  -1   6  11 12556.7 1266.32   4
  -1   6  10 303.695 401.293   7
  -1  -6  10 514.364 610.168   6
  -1   6  10 1073.52 478.829   4
   1   6  -9 606.629 392.911   2
  -1   6   9 365.348 383.638   4
  -1  -6   9 1292.37 671.911   6
  -1   6   9 762.300 375.221   3
  -1   6   9 1396.67 532.823   7
  -1   6   8 122094. 3397.86   3
  -1  -6   8 114947. 3762.66   6
  -1   6   8 111707. 3722.57   4
  -1   6   8 119092. 3899.93   7
   1   6  -8 116947. 3353.68   2
  -1   6   7 2379.98 549.869   3
  -1   6   7 1541.52 525.199   4
  -1   6   7 275.420 395.307   2
  -1   6   7 1291.44 500.071   7
  -1  -6   7 1613.32 627.359   6
   1   6  -7 2134.38 543.341   2
   1   6  -6 48649.0 1982.06   2
  -1   6   6 49950.1 2269.50   7
  -1   6   6 53373.9 2029.57   3
  -1  -6   6 50774.0 2116.42   6
  -1   6   6 50958.8 2165.26   4
  -1   6   6 49780.3 1952.41   2
   1   6  -6 48118.6 2083.90   3
  -1   6   5 34122.1 1575.28   2
   1   6  -5 31674.0 1641.11   3
  -1   6   5 33957.9 1660.27   4
  -1  -6   5 29586.4 1513.46   6
   1   6  -5 30689.4 1550.76   2
  -1   6   5 32200.6 1738.09   7
  -1   6   5 32180.9 1546.73   3
  -1   6   4 44300.4 1821.29   2
  -1   6   4 44193.5 2008.75   7
  -1  -6   4 41998.7 1733.67   6
  -1   6   4 43700.3 1852.97   3
   1   6  -4 44138.8 1938.23   3
   1   6  -4 45383.8 1881.46   2
  -1   6   4 44473.6 1877.07   4
  -1  -6   3 5028.70 608.498   6
   1   6  -3 4903.62 706.620   2
   1  -6  -3 4735.00 293.452   5
  -1   6   3 6902.06 778.360   2
  -1   6   3 6093.47 718.497   4
  -1   6   3 5075.66 766.957   7
  -1   6   3 4434.65 697.172   3
   1   6  -3 5562.06 797.286   3
   1  -6  -2 237804. 4264.33   6
  -1   6   2 249623. 5637.05   3
   1  -6  -2 244495. 4279.18   6
   1   6  -2 244776. 5636.50   2
   1  -6  -2 241405. 4407.34   5
  -1  -6   2 244258. 5124.14   6
  -1   6   2 246005. 5580.48   2
   1   6  -2 245174. 5750.30   3
  -1   6   2 250891. 5595.45   4
   1  -6  -1 41078.6 1060.67   1
  -1   6   1 41660.9 1798.88   2
   1  -6  -1 42786.5 1144.74   6
   1   6  -1 43989.9 1852.74   2
  -1   6   1 42487.4 1844.18   3
   1   6  -1 45221.7 1952.47   3
  -1  -6   1 44774.2 1433.62   6
   1  -6  -1 43550.2 1138.78   5
   1   6   0 12089.4 1007.54   2
  -1   6   0 12031.7 1014.19   3
  -1   6   0 13244.1 1021.15   2
  -1  -6   0 12797.6 623.198   6
   1   6   0 12076.0 1046.70   3
   1   6   1 19227.1 1257.27   4
  -1   6  -1 21135.3 1289.01   3
  -1  -6  -1 18499.5 627.333   6
   1   6   1 16993.0 1193.53   2
   1   6   1 16818.9 1208.81   3
  -1   6  -1 18158.6 1164.52   2
   1   6   2 30016.9 1542.34   2
  -1  -6  -2 33762.2 1215.29   5
  -1   6  -2 32038.6 1545.08   2
  -1   6  -2 29719.1 1574.37   3
   1   6   2 32193.7 1614.07   4
   1   6   2 29751.2 1578.58   3
   1   6   3 485.188 572.509   3
  -1   6  -3 827.659 586.670   3
   1   6   3 250.383 474.280   2
   1   6   3-233.624 398.022   4
  -1   6  -3-486.297 447.376   2
  -1  -6  -3 183.987 249.520   5
  -1  -6  -4 4916.88 475.343   5
   1   6   4 4778.16 715.062   2
   1   6   4 6061.23 813.157   4
   1   6   4 5331.63 768.654   3
  -1   6  -4 4489.87 714.716   3
  -1   6  -4 5376.48 699.512   2
   1   6   5 63360.5 2500.31   4
  -1   6  -5 56647.7 2127.06   2
  -1  -6  -5 59382.7 1882.51   5
   1   6   5 56253.1 2331.03   7
   1  -6   5 57103.9 2228.55   6
   1   6   5 59343.3 2232.33   2
   1   6   5 59437.0 2211.80   3
  -1   6  -5 58158.1 2252.35   3
  -1   6  -6 9246.48 814.328   2
   1   6   6 9029.72 1011.70   7
   1  -6   6 9315.47 964.187   6
  -1  -6  -6 10870.9 651.197   1
   1   6   6 9538.05 911.011   2
   1   6   6 10505.2 1102.85   4
  -1  -6  -6 10188.5 809.579   5
  -1   6  -6 9046.91 885.110   3
   1   6   7 1639.07 503.553   2
   1   6   7 2210.90 692.233   4
   1   6   7 3085.46 727.961   7
  -1   6  -7 2317.14 577.842   3
   1  -6   7 1391.55 535.404   6
  -1   6  -7 1230.86 460.894   2
  -1  -6  -7 1594.72 337.368   1
   1   6   8 12879.6 1185.02   7
   1  -6   8 12973.8 1220.52   6
  -1   6  -8 11492.4 971.482   3
   1   6   8 12923.1 971.274   2
   1   6   8 13664.3 1291.05   4
  -1  -6  -8 12257.6 788.790   1
   1   6   9 1090.96 660.147   4
   1   6   9 1207.43 515.525   7
   1  -6   9 1442.25 720.675   6
   1   6   9 941.647 395.531   2
  -1   6  -9 676.767 445.870   3
   1   6  10 8778.18 1044.21   7
   1  -6  10 8251.80 1143.75   6
   1   6  10 8210.10 1093.39   4
   1  -6  11 19121.4 1645.84   6
   1   6  11 18395.2 1616.38   4
   1   6  11 18960.6 1500.20   7
   1   6  12 49484.9 2783.04   4
   1   6  12 43364.7 2340.40   7
   1  -6  12 50519.8 2817.11   6
   1  -6  13 4690.30 1035.10   6
   1   6  13 3740.64 861.602   4
   1   6  13 3234.25 691.199   7
   1   6  14 11412.8 1221.83   7
   1   6  14 10491.5 1352.79   4
   1  -6  15 2934.34 992.711   6
   1   6  15 4412.36 1084.16   4
   1   6  16 10122.0 1495.46   4
  -1   7  16 1225.44 614.999   7
  -1   7  16 2132.83 782.835   4
  -1   7  15 1301.07 692.248   7
  -1   7  15 733.121 667.847   4
  -1  -7  15 1063.44 846.043   6
  -1  -7  14 5482.82 1123.28   6
  -1   7  14 4055.79 845.697   7
  -1   7  14 4528.52 897.425   4
  -1   7  13 21577.0 1811.13   4
  -1  -7  13 26669.0 2154.81   6
  -1   7  13 22169.0 1842.18   7
  -1   7  12 2420.05 721.879   4
  -1   7  12 1575.94 655.686   7
  -1  -7  12 999.689 800.676   6
  -1   7  11 22213.7 1741.73   7
  -1  -7  11 22352.2 1799.73   6
  -1   7  11 18850.6 1557.41   4
  -1  -7  10 17991.6 1578.03   6
  -1   7  10 13368.4 1283.79   4
  -1   7  10 16937.8 1506.48   7
  -1   7   9 6261.41 946.809   7
  -1   7   9 6169.38 905.303   4
  -1  -7   9 6854.81 992.610   6
  -1   7   9 7188.15 831.500   3
   1   7  -9 6095.35 745.967   2
  -1   7   8 21109.8 1581.25   7
  -1  -7   8 21336.8 1516.12   6
  -1   7   8 20612.5 1345.71   3
   1   7  -8 20843.1 1334.40   2
  -1   7   8 20869.7 1501.57   4
  -1   7   7 24431.7 1610.55   4
  -1  -7   7 26024.7 1607.83   6
  -1   7   7 23779.4 1414.36   2
   1   7  -7 25179.5 1495.01   2
  -1   7   7 26072.6 1505.02   3
  -1   7   7 24686.4 1712.01   7
   1   7  -6 33919.6 1841.85   3
  -1   7   6 36280.8 1900.60   4
  -1   7   6 37135.4 2053.70   7
  -1   7   6 34358.8 1750.20   3
  -1  -7   6 35645.1 1805.78   6
  -1   7   6 36188.0 1754.36   2
   1   7  -6 36466.6 1809.73   2
   1   7  -5 5121.45 805.095   2
  -1   7   5 3548.52 708.778   3
  -1  -7   5 6212.87 779.005   6
  -1   7   5 7535.47 865.381   2
  -1   7   5 5259.80 828.175   7
   1   7  -5 4789.48 898.014   3
  -1   7   5 4290.59 705.901   4
  -1   7   4 31525.0 1829.37   7
   1   7  -4 30762.4 1773.40   3
  -1   7   4 30863.8 1612.19   2
   1   7  -4 31782.3 1704.55   2
  -1  -7   4 28497.5 1436.14   6
  -1   7   4 28016.6 1572.70   3
  -1   7   4 29752.6 1640.79   4
  -1   7   3 17715.1 1229.96   4
   1  -7  -3 15106.3 562.004   5
   1   7  -3 16430.8 1363.44   3
   1   7  -3 16131.7 1216.86   2
  -1  -7   3 14606.9 989.172   6
  -1   7   3 16367.7 1182.59   2
  -1   7   3 16084.7 1215.30   3
  -1  -7   2 440.063 385.785   6
   1  -7  -2 293.369 126.249   5
   1   7  -2-314.539 516.190   2
  -1   7   2 365.835 524.110   2
  -1   7   2 890.579 474.771   4
   1   7  -2 1617.78 701.009   3
  -1   7   2 266.734 577.147   3
  -1  -7   1 20585.8 970.394   6
   1   7  -1 23220.0 1452.45   2
   1   7  -1 21684.8 1475.48   3
   1  -7  -1 20944.6 748.795   6
  -1   7   1 20284.7 1343.10   3
  -1   7   1 20580.8 1318.70   2
   1  -7  -1 21743.3 765.443   5
  -1   7   0 33299.2 1733.02   2
   1   7   0 33359.7 1751.12   2
  -1  -7   0 34490.6 1135.61   6
  -1   7   0 32492.6 1744.34   3
   1   7   0 34814.0 1856.11   3
   1  -7   0 32365.2 1156.26   6
   1   7   1 31008.0 1669.43   2
  -1   7  -1 31099.0 1694.47   3
   1   7   1 32356.1 1755.42   3
  -1  -7  -1 30639.8 892.451   6
  -1   7  -1 26887.2 1527.20   2
   1   7   1 32623.7 1724.79   4
  -1  -7  -1 28474.0 1226.67   5
   1  -7   1 28168.7 1185.37   6
  -1   7  -2 22461.6 1453.03   3
   1   7   2 20379.1 1404.15   3
   1   7   2 21365.1 1436.65   2
   1  -7   2 21256.0 1113.67   6
  -1   7  -2 22571.7 1379.84   2
  -1  -7  -2 23222.4 1020.03   5
   1   7   2 25694.6 1553.49   4
   1   7   3 30420.1 1727.75   3
  -1   7  -3 30870.6 1718.97   3
   1  -7   3 30926.0 1459.67   6
  -1   7  -3 30411.6 1638.20   2
   1   7   3 34695.8 1841.17   4
   1   7   3 34661.4 1795.63   2
  -1  -7  -3 32972.1 1224.61   5
   1  -7   4 2084.24 567.759   6
   1   7   4 1239.51 565.733   2
  -1   7  -4 1433.94 589.083   3
   1   7   4 3883.45 778.964   4
   1   7   4 3075.58 811.966   3
  -1  -7  -4 1954.34 356.010   5
  -1   7  -4 1562.73 572.416   2
  -1   7  -5 345.214 505.220   3
   1   7   5 573.248 532.717   2
   1   7   5 2269.43 648.952   3
   1   7   5 2227.98 651.729   4
  -1  -7  -5 938.864 329.195   5
   1  -7   5 583.510 498.137   6
  -1   7  -5 505.766 447.150   2
   1   7   6 5858.25 795.297   2
  -1   7  -6 5361.86 709.374   2
   1  -7   6 5156.02 834.574   6
   1   7   6 6986.60 961.219   4
   1   7   6 6020.24 849.295   3
  -1  -7  -6 5162.46 602.824   5
  -1   7  -6 4354.12 738.245   3
   1  -7   7 56736.8 2481.43   6
   1   7   7 55183.3 2285.60   2
   1   7   7 58584.8 2698.65   4
  -1   7  -7 54548.6 2343.93   3
   1   7   7 58264.9 2610.97   7
  -1   7  -7 53236.2 2206.67   2
  -1   7  -8 17518.3 1306.07   3
   1   7   8 20406.5 1613.70   4
   1  -7   8 19638.2 1519.66   6
   1   7   8 18187.5 1473.40   7
   1   7   8 17990.5 1258.21   2
   1   7   9 13074.2 1343.57   4
   1  -7   9 14112.7 1387.52   6
  -1   7  -9 13637.7 1140.94   3
   1   7   9 14551.2 1098.49   2
   1   7   9 13819.7 1340.71   7
   1   7  10 5990.29 941.562   7
   1   7  10 5682.10 1019.25   4
   1  -7  10 5425.03 1095.48   6
   1   7  11 10388.3 1287.39   4
   1  -7  11 7972.71 1147.89   6
   1   7  11 9197.34 1115.20   7
   1   7  12-285.183 425.245   4
   1   7  12 669.082 597.070   7
   1  -7  12 1455.45 783.374   6
   1   7  13 13316.2 1427.11   7
   1  -7  13 15722.4 1677.13   6
   1   7  13 15078.4 1651.91   4
   1   7  14 11428.3 1339.86   7
   1   7  14 11474.2 1506.48   4
   1  -7  14 13414.1 1655.48   6
   1  -7  15-667.012 859.475   6
   1   7  15 4.14440 456.047   4
  -1   8  15 13263.3 1531.60   7
  -1   8  15 11549.5 1421.23   4
  -1   8  14-151.946 470.667   4
  -1   8  14 857.298 718.141   7
  -1  -8  14 572.646 887.662   6
  -1  -8  13 3532.05 1075.28   6
  -1   8  13 3211.57 833.551   4
  -1   8  13 4847.39 999.849   7
  -1   8  12-281.051 425.849   4
  -1   8  12 668.455 718.324   7
  -1  -8  11 9499.08 1306.82   6
  -1   8  11 9860.65 1245.32   4
  -1   8  11 11226.8 1327.48   7
  -1   8  10 3781.42 889.703   7
  -1   8  10 3322.66 766.880   4
  -1  -8  10 2920.89 821.790   6
  -1   8   9 49299.0 2263.08   3
  -1   8   9 47714.0 2514.50   4
  -1  -8   9 46865.2 2446.78   6
  -1   8   9 47437.1 2594.15   7
   1   8  -9 47832.9 2231.47   2
  -1   8   8 2070.43 660.162   3
  -1  -8   8 1418.42 629.702   6
  -1   8   8 1785.03 635.572   4
   1   8  -8 1531.76 617.840   2
  -1   8   8 2293.11 735.350   7
  -1   8   7 1194.45 654.003   7
  -1   8   7 1017.03 522.805   2
  -1   8   7 705.806 393.746   4
  -1  -8   7 1082.80 598.163   6
   1   8  -7 2076.82 563.386   2
  -1   8   7 1433.24 576.043   3
  -1   8   6 1245.53 541.415   3
   1   8  -6 1002.17 619.852   2
  -1   8   6 847.498 490.872   2
  -1   8   6 650.261 408.754   4
  -1  -8   6 1645.15 518.649   6
  -1   8   6 1130.99 638.320   7
   1   8  -6 1687.00 725.278   3
  -1   8   5 12326.5 1197.71   4
   1   8  -5 12013.4 1225.27   3
  -1   8   5 11898.0 1091.57   2
  -1  -8   5 11246.7 983.507   6
   1   8  -5 12590.9 1160.81   2
  -1   8   5 11822.2 1274.47   7
  -1   8   5 9664.77 1067.24   3
  -1  -8   4 16438.8 1127.84   6
  -1   8   4 16415.8 1283.48   2
   1   8  -4 18468.0 1502.65   3
  -1   8   4 17501.7 1323.15   4
  -1   8   4 15738.0 1272.47   3
   1   8  -4 16968.1 1337.66   2
  -1   8   3 1126.44 520.851   3
  -1   8   3 1426.43 500.541   4
   1   8  -3 1521.70 709.179   3
  -1   8   3 1209.04 612.186   2
  -1  -8   3 1400.33 431.609   6
   1   8  -3-367.251 620.042   2
  -1   8   2 10859.4 1119.55   3
  -1   8   2 13311.1 1174.44   2
   1   8  -2 14245.4 1281.59   2
  -1  -8   2 12892.2 888.168   6
   1   8  -2 15434.3 1324.65   3
  -1  -8   1 34569.1 1322.78   6
   1   8  -1 32602.5 1867.36   2
  -1   8   1 31505.3 1811.71   2
  -1   8   1 30349.7 1807.45   3
   1   8  -1 31414.9 1919.52   3
  -1   8   0 592.567 539.780   3
   1   8   0 1617.93 698.161   2
  -1   8   0 1403.01 602.874   2
   1  -8   0 1655.91 319.211   6
  -1  -8   0 2136.83 330.251   6
  -1   8  -1 13353.7 1212.36   2
   1   8   1 14670.8 1324.09   3
  -1  -8  -1 13409.7 856.678   5
   1   8   1 14978.8 1277.63   2
  -1   8  -1 12937.0 1224.83   3
   1  -8   1 13301.5 829.138   6
  -1  -8  -2 1699.94 344.659   5
   1   8   2 1846.73 611.733   2
   1   8   2 1422.34 546.802   4
   1   8   2 1138.12 641.854   3
  -1   8  -2 87.0450 694.350   3
   1  -8   2 1359.91 406.808   6
  -1   8  -2 854.097 611.066   2
   1   8   3 44633.4 2234.04   4
   1   8   3 40705.1 2104.07   3
   1  -8   3 40225.6 1718.69   6
  -1   8  -3 41759.9 2020.69   2
  -1  -8  -3 42250.5 1443.09   5
   1   8   3 45349.6 2204.75   2
  -1   8  -3 40718.9 2123.56   3
  -1  -8  -4 1667.05 348.058   5
  -1   8  -4 1638.80 701.164   3
   1   8   4 2547.27 749.945   3
   1   8   4 2533.57 691.234   4
  -1   8  -4 1386.39 602.690   2
   1  -8   4 2341.83 506.882   6
   1   8   4 2241.56 707.741   2
   1   8   5 69749.7 2777.18   3
   1   8   5 67262.5 2753.61   2
  -1   8  -5 65303.0 2758.15   3
   1  -8   5 65403.8 2516.33   6
  -1  -8  -5 68044.1 2084.85   5
  -1   8  -5 60002.1 2543.89   2
   1   8   5 71326.0 2997.66   4
   1  -8   6-95.6217 449.623   6
   1   8   6 184.482 419.997   2
   1   8   6 282.237 512.595   4
  -1   8  -6 114.539 514.335   3
  -1   8  -6 313.552 481.945   2
   1   8   7 15230.4 1455.15   4
   1  -8   7 15294.2 1327.41   6
  -1   8  -7 15268.5 1319.71   3
  -1   8  -7 14144.6 1209.72   2
   1   8   7 15776.4 1273.42   2
  -1   8  -8 289.441 418.365   2
  -1   8  -8 572.712 567.721   3
   1  -8   8 402.654 534.760   6
   1   8   8-59.5697 417.265   2
   1   8   8 873.323 573.953   4
   1   8   9 35834.1 2267.04   4
  -1   8  -9 34626.2 1963.32   3
   1  -8   9 36232.6 2212.54   6
   1   8   9 32778.3 1810.78   2
   1   8   9 36036.9 2230.74   7
   1   8  10 403.881 639.887   7
   1  -8  10 728.146 636.202   6
   1   8  10 607.316 640.745   4
   1  -8  11 24920.9 1983.99   6
   1   8  11 24110.1 1977.04   4
   1   8  11 24798.0 1944.08   7
   1   8  12 1422.07 688.394   4
   1   8  12 21.9207 466.729   7
   1  -8  12 2633.83 1028.15   6
   1   8  13 1549.71 790.290   4
   1  -8  13 1627.49 856.065   6
   1   8  13 213.579 463.122   7
   1   8  14-211.354 574.123   4
   1  -8  14 1204.28 943.568   6
   1   8  14 302.543 554.936   7
  -1   9  14 1077.06 608.763   7
  -1   9  14-131.608 375.367   4
  -1   9  13 8535.41 1300.15   7
  -1   9  13 9061.96 1292.72   4
  -1  -9  13 12077.6 1618.61   6
  -1   9  12-11.6580 484.995   7
  -1  -9  12 2261.50 901.634   6
  -1   9  12 1541.78 646.835   4
  -1   9  11 1406.09 675.700   7
  -1  -9  11 1661.68 761.786   6
  -1   9  11 1784.86 653.818   4
  -1  -9  10 3456.71 925.037   6
  -1   9  10 2472.62 729.982   4
  -1   9  10 3447.55 818.419   7
   1   9  -9 9334.50 1075.64   2
  -1   9   9 8744.31 1110.66   4
  -1   9   9 9345.62 1053.71   3
  -1   9   9 9379.53 1315.61   7
  -1  -9   9 7831.46 1056.83   6
  -1   9   8 536.129 503.523   3
  -1   9   8 286.731 600.242   7
  -1   9   8 1120.32 512.577   4
  -1  -9   8 783.989 475.824   6
   1   9  -8 238.869 485.961   2
   1   9  -7 9680.83 1102.26   2
  -1  -9   7 10830.3 1138.98   6
  -1   9   7 13126.5 1309.01   4
  -1   9   7 12104.9 1411.34   7
  -1   9   7 13928.4 1287.48   3
  -1   9   7 9777.46 1068.47   2
   1   9  -6 14131.0 1423.23   3
  -1  -9   6 12386.0 1116.51   6
  -1   9   6 12173.3 1195.36   2
   1   9  -6 14112.5 1332.18   2
  -1   9   6 12685.2 1287.74   4
  -1   9   6 12744.2 1255.71   3
  -1   9   5 1789.30 709.467   3
   1   9  -5 1388.30 808.487   3
  -1  -9   5 559.482 447.969   6
   1   9  -5-15.1272 548.566   2
  -1   9   5 1220.12 559.557   4
  -1   9   5 325.586 535.453   2
  -1   9   4 8718.04 1030.77   4
  -1  -9   4 9028.77 876.544   6
  -1   9   4 7061.97 954.636   2
   1   9  -4 8598.19 1067.52   2
   1   9  -4 9326.51 1106.10   3
  -1   9   4 8575.04 1014.72   3
   1   9  -3 24783.5 1812.84   3
   1   9  -3 22385.8 1636.79   2
  -1   9   3 23968.9 1634.90   2
  -1   9   3 23130.7 1660.11   3
  -1  -9   3 24167.3 1308.02   6
  -1   9   2 1150.30 511.294   3
   1   9  -2 1800.07 753.919   3
   1   9  -2 1962.22 674.942   2
  -1  -9   2 1057.27 387.112   6
  -1   9   2 1184.67 599.262   2
  -1   9   1 7313.01 1009.34   2
   1   9  -1 8518.47 1124.08   2
   1   9  -1 6134.92 958.479   3
  -1   9   1 6700.82 1005.61   3
  -1   9   0 5098.45 832.173   3
   1   9   0 5541.88 932.539   2
  -1   9   0 5166.86 940.134   2
   1   9   0 7048.91 1116.63   3
   1   9   1 35841.7 2085.43   3
   1   9   1 38396.5 2138.86   2
  -1   9  -1 34247.9 1957.37   2
  -1  -9  -1 36938.6 1497.87   5
  -1   9  -1 32057.5 2016.48   3
   1   9   2 5979.79 1004.64   2
   1  -9   2 5303.17 612.022   6
   1   9   2 5697.38 1008.67   3
  -1   9  -2 3486.84 738.496   2
  -1   9  -2 5688.66 974.202   3
   1   9   3 73953.0 3064.17   2
   1  -9   3 67972.5 2386.03   6
  -1   9  -3 71903.6 2921.64   2
  -1   9  -3 67453.5 2993.19   3
   1   9   3 72462.3 3021.11   3
   1   9   3 71952.7 3088.88   4
   1  -9   4 3531.87 649.527   6
   1   9   4 3552.67 842.896   3
  -1   9  -4 3733.68 732.923   2
   1   9   4 4066.62 833.659   2
  -1   9  -4 4250.34 875.719   3
   1   9   4 4080.12 813.277   4
   1   9   5-180.529 552.313   2
   1  -9   5 425.718 485.031   6
  -1   9  -5 578.243 597.776   3
   1   9   5 800.556 605.480   3
   1   9   5 456.818 594.063   4
  -1   9  -5 859.833 519.786   2
   1   9   6 3231.35 816.685   4
  -1   9  -6 3202.39 824.809   3
   1  -9   6 2138.35 680.639   6
   1   9   6 2005.76 638.129   2
  -1   9  -6 3839.07 790.075   2
  -1   9  -7 32202.8 1929.20   2
   1  -9   7 32333.1 1924.70   6
   1   9   7 30747.2 1909.48   2
   1   9   7 33706.3 2223.92   4
  -1   9  -7 31187.4 2007.57   3
   1   9   8 1318.31 694.925   4
   1  -9   8 1040.64 664.837   6
  -1   9  -8 1965.00 744.666   3
   1   9   8 355.534 421.857   2
   1   9   9 27772.1 2119.64   4
   1   9   9 24219.9 1688.33   2
  -1   9  -9 27528.4 1845.52   3
   1  -9   9 27222.5 1974.79   6
   1  -9  10 3177.72 929.913   6
   1   9  10 3742.57 923.673   4
   1  -9  11 650.331 744.736   6
   1   9  11 483.591 568.173   4
   1  -9  12 325.442 710.716   6
   1   9  12 936.614 653.655   4
   1   9  13 5039.79 1067.94   4
   1  -9  13 4469.10 1044.01   6
  -1  10  12 3535.10 969.963   7
  -1  10  12 4892.81 1005.77   4
  -1 -10  12 5503.48 1114.08   6
  -1  10  11 1224.47 664.447   4
  -1 -10  11 1355.89 855.564   6
  -1  10  11 1660.61 863.104   7
  -1 -10  10 2558.48 740.704   6
  -1  10  10 3682.41 882.863   4
  -1 -10   9 735.374 740.995   6
  -1  10   9 866.780 609.515   3
  -1  10   9 2045.41 757.271   4
   1  10  -9 616.850 482.997   2
  -1  10   8 15153.0 1532.47   4
   1  10  -8 14566.0 1434.69   2
  -1 -10   8 13766.0 1334.03   6
  -1  10   8 15232.2 1412.34   3
  -1  10   7 174.218 630.614   3
  -1  10   7 0.74006 412.591   4
  -1  10   7-891.361 595.805   2
  -1 -10   7 558.158 542.471   6
   1  10  -7 647.634 497.836   2
  -1  10   6 2474.47 680.479   2
  -1 -10   6 3390.31 674.698   6
  -1  10   6 4853.97 930.834   4
  -1  10   6 3996.06 899.838   3
   1  10  -6 4247.79 840.963   2
   1  10  -5 8961.91 1313.86   3
   1  10  -5 6583.97 986.812   2
  -1  10   5 6681.27 971.252   2
  -1 -10   5 5958.54 784.577   6
  -1  10   5 7100.04 1056.77   3
  -1  10   5 6827.81 1046.84   4
   1  10  -4 29761.2 2011.87   2
  -1  10   4 29020.3 1938.24   2
  -1 -10   4 27795.6 1551.09   6
  -1  10   4 26185.1 1881.95   3
   1  10  -4 28349.0 2049.89   3
   1  10  -3 886.219 594.242   2
  -1  10   3 1367.36 693.217   3
  -1  10   3 1550.82 757.135   2
   1  10  -3 1726.49 850.616   3
  -1  10   2 47848.1 2519.57   2
   1  10  -2 51132.2 2639.41   2
  -1  10   2 45762.6 2482.98   3
   1  10  -2 50862.5 2711.72   3
   1  10  -1 9100.70 1233.83   2
  -1  10   1 9447.78 1184.02   3
  -1  10   1 10260.6 1196.56   2
   1  10  -1 8963.03 1247.16   3
   1  10   0 1108.59 675.997   2
   1  10   0 1038.12 712.968   3
  -1  10   0 1468.21 721.234   3
  -1  10   0 1117.06 646.681   2
   1  10   1 3866.61 947.284   3
  -1  10  -1 896.536 635.932   3
  -1  10  -1 1961.60 764.610   2
   1  10   1 2842.46 801.901   2
   1  10   2 50194.1 2642.25   2
  -1  10  -2 45543.5 2450.76   2
  -1  10  -2 49769.4 2648.33   3
   1  10   2 51533.2 2660.88   3
  -1  10  -3 1805.20 753.747   2
   1  10   3 2543.92 768.914   3
  -1  10  -3 2491.23 831.812   3
   1  10   3 2666.20 756.602   2
   1  10   4 28560.6 1947.93   2
  -1  10  -4 27827.9 1882.42   2
   1  10   4 28369.4 2016.36   4
   1 -10   4 23886.4 1455.07   6
  -1  10  -4 29930.0 2097.80   3
   1  10   4 28171.7 1932.84   3
  -1  10  -5 30916.7 2117.13   3
   1  10   5 31408.4 2070.10   2
  -1  10  -5 33394.4 2052.07   2
   1  10   5 32694.2 2235.12   4
   1 -10   5 26502.9 1629.48   6
  -1  10  -6 2519.11 700.207   2
   1 -10   6 3335.48 646.688   6
  -1  10  -6 4188.61 965.026   3
   1  10   6 5054.73 948.136   4
   1  10   6 3593.64 837.104   2
   1  10   7 4447.65 1007.77   4
  -1  10  -7 2907.02 690.621   2
   1 -10   7 2774.25 759.755   6
   1  10   7 2162.51 672.270   2
  -1  10  -7 4907.58 979.785   3
   1 -10   8 18177.0 1576.41   6
   1  10   8 15365.1 1431.74   2
   1  10   8 14961.8 1629.81   4
  -1  10  -8 17162.6 1606.62   3
  -1  10  -9 2013.39 768.778   3
   1  10   9 1377.83 681.019   4
   1 -10   9 1154.11 546.656   6
   1 -10  10 2719.25 942.555   6
   1  10  10 3393.37 876.068   4
   1  10  11 3829.74 1016.74   4
   1 -10  11 2658.57 882.144   6
   1 -10  12 4519.85 1112.10   6
   1  10  12 6757.92 1232.05   4
  -1  11  11 121.431 461.258   4
  -1 -11  11 9.68097 575.667   6
  -1 -11  10 9713.00 1267.82   6
  -1  11  10 9760.19 1352.75   4
  -1 -11   9 2451.51 701.597   6
   1  11  -9 1653.41 631.364   2
  -1  11   9 1993.35 690.470   4
  -1  11   8 392.417 592.161   4
   1  11  -8 394.505 645.614   2
  -1  11   8 1062.11 728.892   3
  -1 -11   8 1205.97 705.003   6
  -1  11   7 1272.81 719.565   3
  -1  11   7 1675.84 700.051   4
  -1 -11   7 1324.12 569.966   6
   1  11  -7 832.500 615.975   2
  -1  11   6 30639.6 2153.91   2
   1  11  -6 34170.5 2256.13   2
  -1  11   6 31737.7 2189.57   3
  -1  11   6 32431.0 2245.31   4
  -1  11   5 4156.68 875.484   2
  -1  11   5 2979.22 893.680   3
   1  11  -5 4898.36 1048.34   2
  -1  11   4 27446.0 2044.06   2
   1  11  -4 30385.7 2145.06   2
  -1  11   4 28490.6 2069.57   3
  -1  11   3 1827.51 772.345   2
   1  11  -3 2426.45 1038.08   3
  -1  11   3 2726.38 822.226   3
   1  11  -3 1944.21 817.210   2
   1  11  -2 7325.68 1145.30   2
  -1  11   2 6469.15 1168.82   3
   1  11  -2 7868.00 1275.64   3
  -1  11   2 9520.48 1282.57   2
  -1  11   1 3064.58 840.000   3
   1  11  -1 3067.12 943.886   2
  -1  11   1 3235.80 843.171   2
   1  11  -1 3168.39 977.465   3
  -1  11   0 57037.2 2949.20   3
  -1  11   0 54089.2 2814.01   2
   1  11   0 51007.2 2859.32   3
   1  11   0 56987.3 2971.21   2
   1  11   1 3869.07 1025.69   2
  -1  11  -1 4067.84 946.984   3
   1  11   1 5240.94 1052.94   3
  -1  11  -1 3117.15 818.043   2
  -1  11  -2 14201.0 1471.91   2
  -1  11  -2 13307.1 1522.02   3
   1  11   2 16194.4 1588.02   3
   1  11   2 16236.5 1599.90   2
   1  11   3 1651.34 736.815   2
  -1  11  -3 1998.21 825.427   3
   1  11   3 3596.42 977.647   3
  -1  11  -3 1901.69 733.993   2
   1  11   4 4946.38 1020.67   2
  -1  11  -4 4583.67 966.836   2
  -1  11  -4 5331.51 1127.77   3
   1  11   5 1953.82 753.156   2
   1  11   5 977.461 623.945   4
  -1  11  -5 779.658 907.598   3
  -1  11  -5-81.6287 583.484   2
   1  11   6 13587.6 1471.96   2
   1  11   6 13656.3 1579.13   4
  -1  11  -6 13857.2 1584.93   3
  -1  11  -6 14385.5 1457.13   2
   1  11   7 857.168 641.952   4
  -1  11  -7 1462.19 884.134   3
   1  11   7-451.217 571.752   2
   1 -11   7-736.278 574.297   6
   1  11   8 1209.60 676.928   4
  -1  11  -8 2193.85 881.810   3
   1  11   8-782.572 629.037   2
   1 -11   8-195.017 549.188   6
   1  11   9 2871.07 839.186   4
  -1  11  -9 3591.72 948.533   3
   1 -11   9 3634.44 888.137   6
   1  11  10 11498.5 1594.68   4
   1 -11  10 9573.79 1297.28   6
   1 -11  11 1618.94 856.442   6
  -1  12   9 684.420 680.833   4
   1  12  -8 4180.20 929.771   2
  -1  12   8 6178.33 1128.73   4
  -1  12   7 3793.57 975.141   3
   1  12  -7 1683.80 656.517   2
  -1  12   6 2279.70 846.516   3
   1  12  -6 1817.17 765.787   2
  -1  12   5 9583.40 1276.97   2
   1  12  -5 7697.18 1194.92   2
  -1  12   5 10062.8 1362.53   3
   1  12  -4 303.997 538.639   2
  -1  12   4 1501.03 673.442   2
  -1  12   4 1662.66 877.324   3
   1  12  -3 432.831 576.521   2
  -1  12   3-286.856 595.663   2
   1  12  -2 12295.7 1510.55   2
  -1  12   2 10443.8 1430.12   3
  -1  12   2 11321.6 1474.49   2
  -1  12   1 5693.25 1175.55   3
  -1  12   1 7518.55 1177.18   2
   1  12  -1 4927.70 1109.06   2
  -1  12   0 458.104 867.597   3
  -1  12   0 733.297 713.698   2
   1  12   0 958.957 675.729   2
  -1  12  -1 4346.89 943.606   2
  -1  12  -1 5367.84 1160.98   3
   1  12   1 4442.86 1046.21   2
  -1  12  -2 4530.24 1088.14   3
  -1  12  -2 4790.25 1020.96   2
   1  12   2 4268.99 997.767   2
  -1  12  -3 2400.37 1040.37   3
   1  12   3 92.8882 698.541   2
  -1  12  -3 1292.16 677.483   2
   1  12   4 367.433 603.580   2
  -1  12  -4 720.334 608.967   2
  -1  12  -4 655.037 637.239   3
  -1  12  -5 13399.0 1653.98   3
  -1  12  -5 14735.5 1608.61   2
   1  12   5 13595.2 1549.05   2
  -1  12  -6 923.165 890.149   3
   1  12   6 1451.89 821.201   2
  -1  12  -7 3635.05 1028.37   3
   1  12   7 2684.46 855.623   4
   1  12   7 2777.17 848.836   2
  -1  12  -8 3629.58 1077.08   3
   1  12   8 4220.89 972.487   4
   1  12   8 2345.87 828.529   2
   1  13  -7 4699.50 1085.27   2
   1  13  -6 990.147 751.321   2
  -1  13   6 227.375 658.488   3
  -1  13   5 314.284 724.623   3
   1  13  -5 229.344 730.877   2
  -1  13   4 1571.86 944.371   3
   1  13  -4-93.7595 660.461   2
  -1  13   4 532.928 680.340   2
  -1  13   3 6231.44 1322.36   3
  -1  13   3 4524.51 1006.81   2
   1  13  -3 4032.11 967.485   2
  -1  13   2 1651.62 879.390   3
  -1  13   2-260.219 738.848   2
   1  13  -2 612.479 777.351   2
   1  13  -1 115.761 555.174   2
  -1  13   1 1251.86 840.001   3
  -1  13   1 2385.35 870.547   2
   1  13   0 360.629 611.808   2
  -1  13   0-175.737 702.078   3
  -1  13   0 242.616 561.831   2
  -1  13  -1 3795.36 1195.33   3
  -1  13  -1 3438.55 978.086   2
   1  13   1 2825.14 899.086   2
  -1  13  -2 1148.06 873.953   3
  -1  13  -2 32.2945 698.967   2
   1  13   2 1515.48 902.419   2
  -1  13  -3 5109.71 1189.60   3
  -1  13  -3 4339.65 975.921   2
   1  13   3 4386.30 1013.49   2
  -1  13  -4 2187.43 1067.59   3
   1  13   4 440.010 601.974   2
  -1  13  -4 430.702 792.229   2
  -1  13  -5 525.481 866.207   3
   1  13   5-317.800 624.397   2
  -1  13  -6 2556.65 1031.23   3
   1  13   6 436.892 648.147   2
  -1  13  -7 8846.13 1445.21   3
  -2   0  18-362.627 779.802   6
  -2   0  17 105.642 762.201   6
  -2   0  16 15333.7 1522.20   6
  -2   0  15 1067.32 735.638   6
  -2   0  14 5578.48 965.378   6
  -2   0  13 239.123 523.328   6
  -2   0  12 51677.5 2389.43   6
  -2   0  11 384.460 495.437   6
  -2   0  10 173245. 4638.59   6
  -2   0   9 373.269 450.602   6
  -2   0   8 273.078 52.4361   3
   2   0  -8 885.491 132.766   2
  -2   0   8 1046.70 496.254   6
  -2   0   8 847.641 107.452   3
  -2   0   7 53.3406 79.0734   3
  -2   0   7-31.7476 348.710   6
  -2   0   6 168685. 3907.50   6
  -2   0   5-362.892 262.825   6
  -2   0   4 146686. 3227.16   6
  -2   0   3 211.160 285.792   6
  -2   0   2 20403.3 743.187   6
  -2   0   1 653.251 163.688   6
  -2   0  -1 247.291 154.083   5
  -2   0  -2 438.414 220.615   5
  -2   0  -3 308.609 295.523   5
  -2   0  -4 119542. 2906.01   5
  -2   0  -5 304.833 313.809   1
  -2   0  -6 294909. 6205.42   1
  -2   0  -7 275.219 428.778   1
  -2   0  -7 60.3967 122.291   3
  -2   0  -8 31427.7 679.863   3
  -2   0  -8 31501.0 1544.97   1
  -2   0  -9 258.584 462.183   1
  -2   0 -10 307226. 7229.18   1
  -2   0 -11 1077.02 681.165   1
  -2   0 -12 75765.4 3117.54   1
   2   0  12 75067.7 3060.45   6
   2   0  12 71530.7 2403.55   7
  -2   0 -13-188.605 556.088   1
   2   0  13 1251.51 708.594   6
  -2   0 -14 26829.2 1976.95   1
   2   0  14 24548.2 1859.33   6
  -2   0 -15 335.096 761.740   1
   2   0  15 210.717 657.152   6
   2   0  16 33315.4 2288.03   6
  -2   0 -16 31757.3 2370.91   1
  -2   0 -17 414.004 830.089   1
   2   0  17 1199.39 715.324   6
   2   0  18 587.673 771.018   6
  -2   1  18 11179.1 1518.44   4
  -2  -1  18 9483.97 1389.96   6
  -2  -1  17 249.293 532.074   6
  -2   1  17-827.771 628.799   7
  -2   1  17 402.891 623.583   6
  -2  -1  16 94.0530 658.952   6
  -2   1  16 270.475 418.498   7
  -2   1  16-78.2832 543.678   6
  -2   1  15 6708.69 1030.30   6
  -2  -1  15 10411.9 1336.98   6
  -2  -1  14 22681.7 1784.36   6
  -2   1  14 23238.4 1691.58   6
  -2  -1  13 728.144 567.366   6
  -2   1  13 1069.14 563.423   6
  -2   1  12 44758.5 2142.86   6
  -2  -1  12 43600.7 2253.41   6
  -2  -1  11 13537.0 1249.07   6
  -2   1  11 13660.0 1120.37   6
  -2   1  10 2473.05 558.478   6
  -2  -1  10 1132.69 617.084   6
   2   1  -9 472.766 100.427   2
   2  -1  -9 824.525 117.165   2
  -2   1   9 538.194 449.104   6
  -2  -1   8 161853. 4122.43   6
  -2   1   8 158368. 2965.24   3
  -2   1   8 158956. 3939.08   6
   2  -1  -8 157476. 3052.89   2
  -2  -1   8 154740. 2966.32   3
  -2   1   7 51550.8 1778.73   6
  -2  -1   7 51235.1 1900.73   6
  -2   1   7 47416.0 1181.93   3
  -2  -1   6 102876. 2833.13   6
  -2   1   6 101665. 2657.38   6
  -2   1   6 106703. 2195.80   3
  -2   1   5 175685. 3447.60   3
  -2  -1   5 179258. 4009.20   6
  -2   1   5 179047. 3806.25   6
  -2   1   4 130892. 2867.36   6
  -2   1   4 129301. 2642.24   3
  -2  -1   4 130733. 3037.03   6
  -2   1   3 9767.40 473.449   3
  -2   1   3 9146.42 514.236   6
  -2  -1   3 8972.89 620.570   6
  -2   1   2 444293. 8164.73   4
  -2   1   2 453421. 8355.57   6
  -2  -1   2 478073. 8534.34   6
  -2   1   2 474867. 8395.57   3
   2  -1  -1 435837. 7337.03   4
  -2   1   1 415294. 7286.61   4
  -2   1   1 431736. 7686.37   6
  -2  -1   1 448977. 7641.95   6
  -2  -1   1 411811. 7416.11   4
  -2   1   0 48862.0 1152.60   7
  -2  -1   0 49465.4 1134.36   4
   2   1   0 54670.2 1184.95   4
   2  -1   0 52485.8 1178.09   5
  -2   1   0 54252.7 1160.11   5
  -2  -1  -1 275313. 5106.65   5
   2   1   1 249576. 5003.34   4
  -2   1  -1 258156. 4669.10   7
  -2   1  -1 260594. 4876.49   5
   2  -1   1 271423. 4693.00   7
  -2  -1  -2 139045. 2707.92   7
   2  -1   2 144159. 2594.84   7
  -2   1  -2 143290. 2921.28   3
  -2  -1  -2 147156. 3038.25   5
  -2   1  -2 146723. 3017.93   5
   2   1   3 44911.6 1120.32   7
  -2   1  -3 47483.1 1254.83   3
  -2  -1  -3 45183.1 1400.92   5
  -2  -1  -3 46272.2 1113.50   7
  -2   1  -3 45604.7 1436.71   5
  -2   1  -4 90892.9 2373.75   1
  -2   1  -4 88485.1 2002.70   3
  -2  -1  -4 89169.1 2334.10   5
   2   1   4 87963.9 1955.93   7
  -2   1  -5 404400. 7876.13   1
  -2  -1  -5 398944. 7848.39   5
  -2   1  -5 400197. 7235.42   3
   2   1   5 392576. 7296.50   7
   2   1   6 46816.7 1413.81   7
  -2  -1  -6 46265.2 1695.81   1
  -2   1  -6 47611.0 1257.93   3
  -2   1  -6 47179.6 1777.72   1
  -2   1  -7 38077.4 1061.67   3
  -2  -1  -7 35109.2 1529.28   1
  -2   1  -7 39086.4 1697.69   1
   2   1   7 34500.0 1246.64   7
   2   1   8 96133.2 2502.64   7
  -2   1  -8 97640.4 2043.97   3
   2   1   8 94156.3 1970.80   2
   2  -1   8 95123.6 1963.69   2
  -2  -1  -8 99512.8 2981.26   1
  -2   1  -8 98323.0 3095.70   1
  -2  -1  -8 94929.5 2062.22   3
   2   1   9 664.537 299.549   7
  -2  -1  -9 168.598 99.8936   3
  -2  -1  -9 403.070 541.552   1
  -2   1  -9-118.927 524.757   1
  -2   1  -9 85.0054 95.5949   3
  -2  -1 -10 536.680 551.147   1
   2   1  10 577.155 311.527   7
  -2   1 -10 1316.28 692.194   1
  -2   1 -11 27701.1 1798.37   1
   2   1  11 26419.5 1308.04   7
  -2  -1 -11 26070.8 1678.12   1
   2   1  12 57475.2 2150.85   7
  -2   1 -12 60770.6 2850.62   1
   2   1  12 61695.0 2669.87   6
   2  -1  12 63689.2 2882.84   6
  -2  -1 -12 62593.7 2751.56   1
  -2  -1 -13 3989.78 862.365   1
   2   1  13 3034.30 715.031   6
   2  -1  13 2645.06 738.147   6
  -2   1 -13 3133.97 852.373   1
  -2   1 -14 20171.5 1812.22   1
   2   1  14 21024.7 1683.42   6
   2  -1  14 21387.4 1803.70   6
  -2  -1 -14 20617.7 1730.95   1
  -2   1 -15 5669.55 1118.99   1
   2  -1  15 5985.13 1101.92   6
  -2  -1 -15 5782.63 1101.65   1
   2   1  15 6244.78 1058.68   6
   2  -1  16 2672.57 895.743   6
  -2  -1 -16 4249.34 1014.21   1
   2   1  16 2435.78 754.857   6
  -2   1 -16 3911.19 1042.68   1
  -2   1 -17-739.350 833.656   1
   2  -1  17 441.691 623.632   6
   2   1  17 370.100 591.612   6
  -2  -1 -17 1093.95 776.792   1
   2  -1  18 16153.3 1824.99   6
  -2   2  18-692.577 592.006   4
  -2   2  17 20784.1 1878.73   4
  -2  -2  17 18787.4 1807.25   6
  -2   2  17 17868.4 1611.48   7
  -2   2  16 8206.79 1103.33   7
  -2  -2  16 8860.75 1336.76   6
  -2   2  16 9288.36 1237.45   4
  -2   2  15 19.6572 515.933   6
  -2  -2  15 404.733 560.637   6
  -2   2  15 999.383 502.742   7
  -2   2  15 49.2822 445.921   4
  -2   2  14 19191.2 1617.69   4
  -2  -2  14 18814.7 1655.04   6
  -2   2  14 18094.7 1451.64   7
  -2   2  14 18147.1 1451.01   6
  -2   2  13 22694.4 1577.15   7
  -2   2  13 22291.8 1519.55   6
  -2  -2  13 23715.7 1763.13   6
  -2   2  12 8474.63 932.023   6
  -2  -2  12 8131.11 1080.05   6
  -2   2  12 9675.57 1015.88   7
  -2  -2  11 16952.1 1420.82   6
  -2   2  11 18973.0 1263.14   6
  -2  -2  10 35083.0 1890.02   6
  -2   2  10 35844.3 1660.14   6
  -2  -2   9 37569.7 1851.17   6
   2   2  -9 37779.2 1079.51   2
  -2   2   9 35812.3 1559.80   6
   2   2  -8 64988.1 1643.18   2
  -2   2   8 63817.6 1583.54   3
  -2  -2   8 65462.7 2404.53   6
  -2   2   8 63879.9 2065.55   6
  -2   2   7 107045. 2766.53   6
  -2   2   7 105262. 2388.58   3
  -2  -2   7 111206. 3133.96   6
  -2  -2   6 6484.20 717.104   6
  -2   2   6 5408.80 494.120   6
  -2   2   6 6540.29 595.599   4
  -2   2   6 5585.92 411.191   3
  -2   2   5 21544.4 994.164   4
  -2   2   5 20751.8 869.567   6
  -2   2   5 21657.4 820.096   3
  -2  -2   5 21723.0 1109.52   6
  -2   2   4 5544.91 415.769   3
  -2   2   4 5219.28 389.347   6
  -2  -2   4 5648.01 547.969   6
  -2   2   4 4749.43 421.497   4
  -2   2   3 395354. 7585.07   4
  -2   2   3 428328. 7674.19   3
  -2  -2   3 429960. 7907.50   6
  -2   2   3 432866. 8012.39   7
  -2   2   3 403070. 7486.42   6
  -2   2   2 84829.0 2156.19   7
  -2   2   2 92984.6 1976.33   6
  -2  -2   2 89819.2 2111.03   6
  -2   2   2 86048.0 2033.82   3
  -2   2   1 1155.79 280.461   7
  -2  -2   1 953.774 245.298   6
  -2   2   1 839.243 244.378   3
  -2   2   1 897.195 183.148   4
  -2   2   0 152561. 2891.53   5
  -2   2   0 156013. 3183.01   7
  -2  -2   0 156334. 3104.97   6
  -2   2   0 162130. 3298.34   3
   2  -2   0 157064. 2886.33   5
  -2   2  -1 304158. 5649.81   3
  -2  -2  -1 292067. 5708.99   5
  -2   2  -1 297672. 5401.41   5
   2   2   1 304663. 5731.16   4
  -2  -2  -1 292031. 5525.38   6
  -2   2  -1 285308. 5430.76   7
  -2   2  -2 16704.2 749.005   1
   2   2   2 14378.6 807.431   4
  -2   2  -2 15097.4 705.586   3
  -2  -2  -2 14640.0 729.023   5
  -2   2  -3 804347. 13935.8   1
   2   2   3 812312. 13684.7   7
  -2   2  -3 783751. 13711.9   3
  -2  -2  -3 793106. 13829.7   5
   2   2   4 14051.6 684.161   7
   2   2   4 16137.2 1000.14   4
  -2   2  -4 15501.0 708.672   3
  -2   2  -4 14724.8 838.895   1
  -2  -2  -4 14009.1 786.549   5
  -2  -2  -5 454.504 350.395   5
  -2   2  -5 779.582 237.475   3
   2   2   5 751.349 256.401   7
  -2   2  -5 540.416 316.387   1
   2   2   6 3513.00 402.300   7
  -2  -2  -6 2558.94 463.189   5
  -2   2  -6 2769.98 565.641   1
  -2   2  -6 2585.53 343.933   3
  -2  -2  -6 2012.78 422.124   1
  -2  -2  -7 174779. 4156.06   1
  -2   2  -7 168997. 3580.58   3
  -2   2  -7 169366. 4393.78   1
   2   2   7 173700. 3903.05   7
  -2  -2  -8 57270.9 2094.48   1
  -2   2  -8 57714.6 1545.46   3
   2   2   8 54828.0 1474.51   2
   2   2   8 55968.5 1862.75   7
  -2   2  -8 58659.7 2336.22   1
  -2   2  -9 66145.5 1652.24   3
  -2  -2  -9 68533.7 2458.01   1
   2   2   9 62071.3 2094.84   7
   2   2   9 64435.9 1553.80   2
  -2   2  -9 66192.8 2671.72   1
   2   2  10 35471.7 1556.42   7
  -2   2 -10 37802.4 2043.55   1
  -2  -2 -10 38003.9 1870.56   1
  -2   2 -11 7120.17 1029.26   1
   2   2  11 7612.98 902.606   6
  -2  -2 -11 9461.41 988.392   1
   2   2  11 6858.30 724.974   7
   2   2  12 1673.92 444.067   7
  -2  -2 -12 2032.34 682.226   1
   2  -2  12 549.756 612.897   6
   2   2  12 378.299 475.521   6
  -2   2 -12 408.122 643.265   1
   2  -2  13 18380.1 1645.83   6
  -2  -2 -13 22262.2 1687.84   1
  -2   2 -13 20801.5 1743.17   1
   2   2  13 20978.8 1533.25   6
  -2  -2 -14 17688.7 1601.24   1
   2   2  14 18521.6 1527.79   6
  -2   2 -14 19138.3 1748.95   1
   2  -2  14 18580.0 1718.57   6
  -2   2 -15 451.793 643.688   1
   2   2  15 1921.60 689.542   6
   2  -2  15 213.735 774.768   6
  -2  -2 -15 1779.12 762.274   1
   2   2  16 8672.72 1410.23   4
  -2   2 -16 8318.16 1412.89   1
   2  -2  16 7673.32 1248.48   6
  -2  -2 -16 7313.79 1204.51   1
   2  -2  17 5382.52 1167.00   6
  -2  -2 -17 8211.40 1317.62   1
   2   2  17 6525.68 1340.90   4
  -2   3  18 694.354 597.062   4
  -2   3  17 4492.22 852.942   7
  -2  -3  17 3527.65 1077.94   6
  -2   3  17 3615.87 852.572   4
  -2  -3  16 1008.63 699.925   6
  -2   3  16 693.580 566.767   4
  -2   3  16 928.156 497.222   7
  -2  -3  15 41999.0 2636.97   6
  -2   3  15 44820.1 2536.49   4
  -2   3  15 44762.0 2454.94   7
  -2  -3  14-547.032 567.609   6
  -2   3  14 743.525 449.332   4
  -2   3  14 630.271 452.684   7
  -2  -3  13 16034.3 1519.60   6
  -2   3  13 14630.8 1338.10   4
  -2   3  13 14075.1 1136.28   6
  -2   3  13 13492.0 1248.85   7
  -2  -3  12 653.250 633.947   6
  -2   3  12 909.291 515.003   4
  -2   3  12 209.598 405.644   7
  -2   3  12 624.864 407.501   6
  -2   3  11 32571.2 1589.49   6
  -2   3  11 30367.0 1722.96   7
  -2   3  11 31309.9 1809.69   4
  -2  -3  11 33036.9 1947.54   6
  -2  -3  10 1214.12 728.458   6
  -2   3  10 188.394 391.569   7
  -2   3  10 337.691 336.564   6
  -2   3  10 165.252 435.687   4
  -2   3   9 80357.7 2774.83   4
   2   3  -9 81781.3 2117.94   2
  -2   3   9 81902.6 2810.42   7
  -2  -3   9 86025.7 3011.02   6
  -2   3   9 80004.0 2040.83   3
  -2   3   9 79754.4 2423.94   6
  -2   3   8 15081.9 1030.53   4
  -2   3   8 12926.0 1018.48   7
  -2  -3   8 15686.2 1211.20   6
  -2   3   8 13980.7 840.142   6
  -2   3   8 13199.6 719.695   3
   2   3  -8 14779.3 785.027   2
  -2   3   7 7327.61 703.701   4
  -2   3   7 7799.40 813.296   7
  -2   3   7 6716.16 583.798   6
  -2  -3   7 6968.52 831.716   6
  -2   3   7 6738.48 544.854   3
   2   3  -7 8579.00 639.249   2
  -2   3   6 210.090 362.953   7
  -2   3   6 1139.39 289.496   3
  -2   3   6 162.145 198.174   6
  -2   3   6 289.604 260.609   4
  -2  -3   6 982.295 458.993   6
  -2   3   5 158978. 3672.61   4
  -2   3   5 157237. 3494.98   3
  -2  -3   5 155966. 3862.13   6
  -2   3   5 158677. 3288.19   6
  -2   3   5 164361. 3957.94   7
  -2  -3   4 5029.51 569.718   6
  -2   3   4 4380.35 440.746   3
  -2   3   4 5238.26 589.915   7
  -2   3   4 4790.74 345.421   6
  -2   3   4 4592.74 284.263   1
  -2   3   4 5133.77 462.457   4
  -2   3   3 44753.4 1408.01   4
  -2  -3   3 49485.9 1572.68   6
  -2   3   3 47650.6 1657.76   7
  -2   3   3 47554.8 1081.34   5
  -2   3   3 53184.2 1341.02   6
  -2   3   3 48205.1 1487.50   3
  -2   3   3 46912.2 1020.83   1
  -2   3   2 11458.4 734.342   7
  -2   3   2 10714.2 585.818   4
  -2   3   2 10002.3 642.592   3
  -2  -3   2 10509.7 646.964   6
  -2  -3   1 358496. 6597.77   6
  -2   3   1 355266. 6802.58   3
  -2   3   1 346807. 6817.69   7
  -2   3   0 33600.6 1220.74   3
   2   3   0 36199.5 1272.57   4
  -2   3   0 35103.1 924.889   1
  -2   3   0 31591.9 1139.63   7
  -2  -3   0 32829.0 991.953   6
   2  -3   0 33103.1 782.032   5
  -2  -3  -1 285799. 5775.87   5
  -2  -3  -1 290080. 5436.45   6
  -2   3  -1 298433. 5492.63   1
   2   3   1 298147. 5896.45   4
  -2   3  -1 288821. 5785.67   3
  -2   3  -2 249.739 230.639   1
   2   3   2 127.658 293.672   4
  -2   3  -2 425.921 278.148   3
  -2  -3  -2-11.0447 235.516   5
  -2   3  -3 112107. 2762.15   1
   2   3   3 114557. 3062.55   4
  -2  -3  -3 114587. 2702.24   5
  -2   3  -3 110952. 2730.76   3
  -2   3  -4 11417.7 784.349   1
   2   3   4 10313.6 692.661   7
  -2  -3  -4 10740.3 700.704   5
   2   3   4 12375.0 919.873   4
  -2   3  -4 11138.1 683.342   3
   2   3   5 146268. 3504.74   7
  -2   3  -5 153074. 3778.10   1
   2   3   5 144319. 3995.64   4
  -2  -3  -5 153911. 3604.04   5
  -2   3  -5 149578. 3413.83   3
  -2   3  -6 1508.50 488.303   1
   2   3   6 769.505 298.649   7
  -2  -3  -6 735.545 406.252   5
   2   3   6 1078.91 423.342   2
   2   3   6 1174.49 550.858   4
  -2   3  -6 565.065 294.774   3
   2   3   7 51664.7 1613.28   2
  -2  -3  -7 50917.8 1852.29   1
   2   3   7 53168.6 2396.50   4
  -2   3  -7 51650.6 1641.46   3
   2   3   7 53748.7 1854.22   7
  -2  -3  -7 50466.9 1965.43   5
  -2   3  -7 51258.1 2111.27   1
  -2   3  -8 28927.9 1662.31   1
   2   3   8 29980.6 1791.07   4
   2   3   8 26829.2 1067.76   2
  -2  -3  -8 26811.9 1357.99   1
  -2   3  -8 26995.3 1104.26   3
   2   3   8 25627.1 1277.20   7
   2   3   9 40245.5 2228.81   4
  -2   3  -9 44253.6 2151.04   1
  -2   3  -9 42565.0 1398.66   3
   2   3   9 40280.7 1307.14   2
   2   3   9 37829.0 1656.56   7
  -2  -3  -9 39552.0 1798.06   1
  -2   3 -10 439.125 643.078   1
   2   3  10 1311.75 721.751   4
   2   3  10 927.923 415.666   6
  -2  -3 -10 1290.03 489.120   1
   2   3  10 597.165 320.734   7
  -2  -3 -11 15460.0 1241.80   1
  -2   3 -11 14843.3 1475.16   1
   2   3  11 17587.2 1630.09   4
   2   3  11 16485.3 1203.38   6
   2   3  11 14438.6 1050.10   7
   2   3  12 5358.99 1033.99   4
  -2  -3 -12 3780.85 764.482   1
  -2   3 -12 3217.87 846.939   1
   2   3  12 4358.81 634.973   7
   2   3  12 3102.43 661.164   6
   2  -3  12 3823.37 915.281   6
  -2   3 -13 4691.67 930.023   1
   2  -3  13 3988.13 941.595   6
   2   3  13 7240.87 1191.98   4
   2   3  13 7005.64 903.251   6
  -2  -3 -13 5727.47 914.220   1
  -2   3 -14 1817.80 887.206   1
   2   3  14 949.406 874.204   4
   2  -3  14 1492.94 766.702   6
  -2  -3 -14 1768.93 759.289   1
   2   3  15 19591.7 1955.02   4
  -2  -3 -15 15242.0 1550.76   1
  -2   3 -15 18225.5 1842.06   1
   2  -3  15 17925.3 1831.69   6
   2  -3  16 1293.42 894.164   6
  -2   3 -16 369.407 723.112   1
  -2  -3 -16 1160.04 737.867   1
   2   3  16 2482.72 1112.87   4
   2  -3  17 186.738 848.507   6
   2   3  17 1279.63 791.367   4
  -2   4  17 8913.39 1204.78   7
  -2   4  17 9077.57 1212.58   4
  -2  -4  16 8727.53 1314.27   6
  -2   4  16 7915.76 1107.82   7
  -2   4  16 7666.00 1101.30   4
  -2  -4  15 1650.19 932.939   6
  -2   4  15 819.168 569.967   4
  -2   4  15 395.542 382.093   7
  -2   4  14 9048.07 1136.77   7
  -2  -4  14 11138.5 1386.07   6
  -2   4  14 9968.52 1155.27   4
  -2   4  13 9383.12 1059.33   7
  -2   4  13 11412.2 1186.32   4
  -2  -4  13 12812.6 1417.29   6
  -2   4  12 9597.59 1072.56   7
  -2   4  12 9208.88 1038.62   4
  -2  -4  12 9803.89 1240.26   6
  -2   4  11 31534.4 1780.61   4
  -2   4  11 31774.0 1823.05   7
  -2  -4  11 29805.5 1923.16   6
  -2   4  10 29068.0 1316.50   6
  -2   4  10 29154.8 1641.66   4
  -2  -4  10 29203.7 1826.89   6
  -2   4  10 31997.0 1775.08   7
  -2   4   9 7709.10 898.528   7
  -2   4   9 7633.33 819.174   4
  -2  -4   9 8508.99 1044.38   6
  -2   4   9 7024.16 614.240   6
  -2   4   9 8487.64 658.511   3
   2   4  -9 8010.81 647.441   2
  -2   4   8 21058.1 1373.13   7
  -2   4   8 19827.3 1235.06   4
  -2  -4   8 20567.6 1450.57   6
  -2   4   8 19448.5 923.487   6
   2   4  -8 21495.6 1062.91   2
  -2   4   8 21059.1 1042.17   3
   2   4  -7 12086.0 833.798   2
  -2   4   7 12104.2 661.452   6
  -2  -4   7 12732.9 1115.91   6
  -2   4   7 12352.8 1038.07   7
  -2   4   7 12617.0 924.293   4
  -2   4   7 11656.5 786.957   3
  -2   4   6 54519.5 1925.03   4
  -2   4   6 54362.0 2100.75   7
  -2   4   6 50920.9 1429.31   6
   2   4  -6 51153.3 1798.18   2
  -2  -4   6 52661.3 2066.05   6
  -2   4   6 52095.6 1746.22   3
  -2   4   5 1588.39 376.052   3
  -2   4   5 1631.31 470.435   7
  -2   4   5 2238.01 425.569   4
   2   4  -5 2834.72 517.938   2
  -2  -4   5 1441.55 474.797   6
  -2   4   5 2153.42 268.852   6
  -2   4   4 134303. 3269.27   4
  -2   4   4 139522. 3304.75   3
  -2   4   4 134562. 2831.21   6
  -2  -4   4 138226. 3408.13   6
  -2   4   4 131314. 2620.01   5
  -2   4   4 138832. 3593.02   7
  -2   4   3 122212. 3275.84   7
  -2   4   3 121741. 2998.08   4
  -2   4   3 128178. 3119.33   3
  -2  -4   3 128633. 3103.59   6
  -2   4   2-70.9375 216.112   4
  -2   4   2 208.606 280.816   7
  -2  -4   2 573.622 298.592   6
  -2   4   1 33429.3 1258.13   2
  -2  -4   1 33276.1 1058.31   6
  -2   4   1 32721.1 1267.14   7
  -2   4   1 32764.6 1254.46   3
  -2   4   0 143673. 3393.84   7
  -2  -4   0 142363. 2991.35   6
  -2   4   0 140596. 3439.12   3
   2  -4   0 144340. 2692.94   5
  -2   4   0 142060. 3417.92   2
  -2   4   0 142256. 2825.05   1
   2   4   0 151414. 3564.78   4
   2   4   1 161489. 3784.11   4
  -2   4  -1 151481. 3208.04   1
  -2  -4  -1 158140. 3116.86   6
  -2   4  -1 152591. 3605.72   2
  -2   4  -1 150167. 3652.72   3
   2   4   2 65029.8 2154.58   4
  -2  -4  -2 68075.6 1945.84   5
  -2   4  -2 64961.1 2034.93   3
  -2   4  -2 65027.8 1802.34   1
  -2   4  -3 148723. 3681.02   3
  -2   4  -3 153104. 3552.73   1
  -2  -4  -3 154618. 3491.84   5
  -2   4  -4 6335.75 635.554   3
   2   4   4 7753.50 693.657   2
   2   4   4 7862.01 814.768   4
  -2  -4  -4 7800.08 598.767   5
  -2   4  -4 7300.33 684.614   1
  -2  -4  -5 805.650 343.949   5
   2   4   5 1098.70 414.138   7
  -2   4  -5 1154.32 360.448   3
   2   4   5 1032.69 393.460   2
  -2   4  -5 335.984 360.342   1
   2   4   5 721.459 563.518   4
   2   4   6 38.3368 322.313   7
   2   4   6 968.964 451.310   2
  -2   4  -6 1529.12 422.574   3
  -2  -4  -6 500.202 373.120   5
  -2   4  -6 695.346 486.633   1
   2   4   6 816.645 530.777   4
  -2   4  -7 73707.4 2670.31   1
  -2   4  -7 72778.1 2245.16   3
   2   4   7 70106.2 2810.65   4
   2   4   7 72927.4 2438.72   7
  -2  -4  -7 76754.6 2327.96   1
   2   4   7 77997.8 2257.45   2
  -2  -4  -7 70930.3 2446.61   5
   2   4   8 10492.1 746.815   2
   2   4   8 10265.9 876.238   7
  -2  -4  -8 12106.0 891.565   1
  -2   4  -8 12603.6 1180.26   1
  -2   4  -8 9641.91 757.694   3
   2   4   8 11910.7 1200.77   4
  -2   4  -9 37881.1 2084.63   1
   2   4   9 35529.8 2114.65   4
  -2   4  -9 39391.6 1536.74   3
   2   4   9 40419.3 1478.21   2
  -2  -4  -9 42424.7 1792.42   1
   2   4   9 37938.8 1770.81   7
   2   4   9 39994.7 1625.86   6
   2   4  10 27649.6 1385.51   6
   2   4  10 26967.6 1498.73   7
   2   4  10 27831.0 1930.30   4
  -2   4 -10 28998.4 1861.93   1
  -2  -4 -10 28073.7 1535.04   1
   2   4  11 16177.0 1613.28   4
  -2   4 -11 16638.1 1534.01   1
   2  -4  11 14672.6 1443.55   6
  -2  -4 -11 13698.8 1145.37   1
   2   4  11 12244.0 1057.29   7
   2   4  12 2120.25 759.528   4
   2   4  12 1522.65 465.828   7
   2  -4  12 980.512 690.058   6
  -2  -4 -12 2972.84 652.593   1
  -2   4 -12 2138.51 850.525   1
   2   4  13 9362.33 1267.01   4
   2  -4  13 9674.44 1344.30   6
   2   4  13 7783.98 908.633   7
  -2   4 -13 10906.2 1390.91   1
  -2  -4 -13 7556.96 975.251   1
  -2   4 -14 26070.3 2162.53   1
   2  -4  14 26733.3 2131.85   6
   2   4  14 28827.2 2285.35   4
  -2  -4 -14 27107.0 1881.74   1
  -2   4 -15 1176.41 752.316   1
   2   4  15-16.2314 530.607   4
   2  -4  15 794.644 822.454   6
   2  -4  16 14182.2 1773.67   6
   2   4  16 13806.4 1693.38   4
  -2   5  17-161.234 532.103   7
  -2   5  17 118.069 524.272   4
  -2  -5  16 1629.37 853.527   6
  -2   5  16 481.938 461.222   7
  -2   5  16 945.330 489.144   4
  -2   5  15 1143.69 561.765   4
  -2   5  15 289.139 392.913   7
  -2  -5  15 1460.79 933.755   6
  -2  -5  14 25965.9 2140.38   6
  -2   5  14 25807.8 1856.79   4
  -2   5  14 24046.2 1819.63   7
  -2   5  13 718.447 529.205   7
  -2   5  13-378.388 441.418   4
  -2  -5  13-142.774 623.086   6
  -2   5  12 46979.6 2361.90   4
  -2  -5  12 47596.3 2623.64   6
  -2   5  12 42677.3 2311.93   7
  -2   5  11 352.890 444.674   7
  -2   5  11 762.837 449.547   4
  -2   5  10 7955.50 966.503   7
  -2  -5  10 8812.83 1095.61   6
  -2   5  10 7498.81 863.746   4
   2   5  -9 168.392 373.302   2
  -2   5   9 410.891 400.550   7
  -2  -5   9 1226.81 680.288   6
  -2   5   9 332.017 280.801   3
  -2   5   9 316.541 411.696   4
  -2   5   8 124793. 3322.14   3
  -2   5   8 118616. 3785.54   7
  -2   5   8 123788. 3645.26   4
  -2  -5   8 124398. 3852.75   6
   2   5  -8 124464. 3356.70   2
  -2   5   7 8638.39 843.767   4
   2   5  -7 7472.63 745.405   2
  -2   5   7 8027.58 913.312   7
  -2  -5   7 7516.76 920.015   6
  -2   5   7 7913.29 774.851   3
  -2   5   7 7278.18 474.695   6
   2   5  -6 90767.7 2731.05   2
  -2   5   6 89665.5 2116.99   6
  -2   5   6 90293.9 2793.20   4
  -2  -5   6 89648.5 2922.70   6
  -2   5   6 94420.6 2715.39   3
  -2   5   6 90884.8 3022.65   7
  -2   5   5 23630.6 1235.28   4
  -2   5   5 25122.1 1260.85   3
  -2  -5   5 23013.8 1301.12   6
   2  -5  -5 23818.2 760.566   6
   2   5  -5 22549.3 1270.08   2
  -2   5   5 23667.6 1401.18   7
  -2   5   4 42252.7 1668.42   4
  -2  -5   4 43392.1 1716.51   6
  -2   5   4 41751.8 1852.09   7
  -2   5   4 42981.6 1706.57   3
   2   5  -4 43512.9 1761.93   2
   2  -5  -4 45175.9 1086.47   6
   2   5  -3 2000.72 595.238   2
  -2   5   3 1385.81 356.014   4
  -2   5   3 2261.26 516.148   2
  -2   5   3 2044.90 452.677   3
   2  -5  -3 1605.02 167.571   6
  -2   5   3 2715.70 563.409   7
  -2  -5   3 1482.83 438.318   6
  -2   5   2 150713. 3887.23   7
  -2   5   2 154008. 3798.10   3
  -2   5   2 153393. 3794.54   2
   2   5  -2 151497. 3881.20   2
  -2  -5   2 153778. 3517.03   6
  -2   5   2 148907. 3663.03   4
  -2   5   1 86444.5 2582.40   3
  -2  -5   1 86424.4 2198.38   6
  -2   5   1 87668.4 2579.48   2
   2   5  -1 88434.3 2683.07   2
  -2   5   1 85568.6 2616.70   7
  -2   5   0 40147.8 1076.93   1
  -2  -5   0 38095.8 1190.48   6
  -2   5   0 36884.2 1547.65   2
   2   5   0 39636.0 1688.55   2
  -2   5   0 38829.6 1608.82   3
   2   5   0 41448.8 1683.03   4
   2  -5   0 38740.0 968.005   5
   2   5   1 83554.2 2600.21   4
  -2   5  -1 77436.3 1950.31   1
  -2  -5  -1 82598.9 1860.11   6
  -2   5  -1 78632.0 2427.64   2
  -2   5  -1 79550.4 2489.85   3
   2   5   1 80115.0 2548.99   2
  -2   5  -2 20380.5 921.935   1
   2   5   2 22002.5 1270.87   4
  -2   5  -2 19507.9 1166.56   3
   2   5   2 21394.0 1239.96   2
  -2  -5  -2 22445.6 1042.15   5
  -2   5  -2 20947.8 1154.55   2
  -2   5  -3 4674.97 540.407   1
  -2   5  -3 4444.25 651.573   3
  -2  -5  -3 5051.45 519.240   5
   2   5   3 7138.95 810.795   2
   2   5   3 5000.18 695.456   4
   2   5   3 4835.54 281.637   6
  -2   5  -3 5004.68 618.856   2
  -2   5  -4 54756.6 1860.05   1
  -2   5  -4 50354.2 1917.37   3
   2   5   4 47011.5 1122.86   6
   2   5   4 51672.0 1948.45   2
  -2  -5  -4 50891.9 1684.41   5
  -2   5  -5 54905.4 2067.55   1
   2   5   5 61579.1 2457.38   4
  -2   5  -5 57047.7 2053.25   3
   2   5   5 58133.4 2084.88   2
  -2  -5  -5 56246.7 1893.74   5
   2   5   6 44304.4 1918.93   7
   2   5   6 46885.5 2223.96   4
  -2   5  -6 45369.0 1827.16   3
   2   5   6 45672.8 1826.00   2
  -2   5  -6 46264.5 1962.82   1
  -2  -5  -6 46911.8 1784.53   5
   2   5   7 10646.8 1198.15   4
   2   5   7 13529.2 969.379   2
  -2   5  -7 13244.9 980.951   3
  -2  -5  -7 12232.4 836.795   1
  -2  -5  -7 12101.3 978.048   5
   2   5   7 14200.9 1094.84   7
  -2   5  -7 15022.3 1213.61   1
   2   5   8 66469.5 2935.47   4
  -2  -5  -8 71106.0 2283.69   1
   2   5   8 67154.2 2559.63   7
  -2   5  -8 68578.4 2746.58   1
   2   5   8 71986.2 2315.98   2
  -2   5  -8 67218.8 2310.80   3
  -2  -5  -8 67232.8 2487.23   5
   2   5   9 512.837 405.928   7
   2   5   9 363.354 541.430   4
   2   5   9 242.168 312.699   2
  -2   5  -9 288.065 371.471   3
  -2  -5  -9 443.423 401.347   1
  -2   5  -9 384.636 656.043   1
  -2   5 -10 3114.47 818.992   1
  -2  -5 -10 2863.93 576.099   1
   2   5  10 3065.23 798.525   4
   2  -5  10 2007.73 599.831   6
   2   5  10 2519.50 598.736   7
   2   5  11 1595.26 651.149   4
  -2   5 -11 2772.67 922.699   1
  -2  -5 -11 2049.45 541.865   1
   2  -5  11 2301.10 815.756   6
   2   5  11 1849.26 527.364   7
   2   5  12 52300.3 2949.76   4
   2  -5  12 57906.8 2966.83   6
  -2   5 -12 55012.4 2939.32   1
   2   5  12 51388.2 2410.88   7
  -2  -5 -12 59921.4 2511.87   1
   2   5  13 4638.17 1056.73   4
   2  -5  13 3447.15 972.506   6
   2   5  13 4378.27 752.118   7
  -2   5 -13 5426.11 1212.67   1
   2   5  14 24688.4 2138.56   4
   2  -5  14 21616.6 1973.64   6
   2   5  15 332.753 712.150   4
   2  -5  15-150.701 740.705   6
   2   5  16 6335.67 1316.43   4
   2  -5  16 7241.15 1386.89   6
  -2   6  16 3932.17 844.193   4
  -2   6  16 3923.01 884.261   7
  -2   6  15 344.464 440.258   4
  -2   6  15 82.3714 426.488   7
  -2  -6  15 544.613 893.484   6
  -2   6  14 1770.29 564.764   4
  -2   6  14 917.657 502.420   7
  -2   6  13 3533.18 763.526   7
  -2  -6  13 3949.59 975.003   6
  -2   6  13 3227.21 743.174   4
  -2   6  12 12948.5 1313.41   7
  -2   6  12 13637.6 1282.80   4
  -2  -6  12 14850.0 1513.38   6
  -2  -6  11 501.367 686.384   6
  -2   6  11 1441.72 503.148   4
  -2   6  11 2167.21 602.419   7
  -2   6  10 42905.0 2159.13   4
  -2  -6  10 43400.6 2324.47   6
  -2   6  10 42080.1 2256.50   7
  -2   6   9 9496.55 990.730   4
  -2   6   9 11195.1 1145.18   7
  -2  -6   9 8976.37 1159.87   6
   2   6  -9 9564.44 875.707   2
  -2   6   9 9033.94 843.830   3
  -2   6   8 2318.89 532.708   4
  -2   6   8 1343.89 433.553   3
   2   6  -8 1381.45 512.139   2
  -2   6   8 995.499 483.488   7
  -2  -6   8 2287.56 763.586   6
  -2   6   7 10207.0 955.783   4
  -2  -6   7 11426.5 1102.33   6
   2   6  -7 11157.0 974.374   2
  -2   6   7 10115.1 888.413   3
  -2   6   7 11205.4 1093.09   7
  -2   6   6 151473. 4167.36   4
   2   6  -6 155334. 4138.86   2
  -2   6   6 152490. 4496.02   7
  -2  -6   6 155083. 4234.98   6
  -2   6   6 159652. 4110.97   3
  -2   6   5-425.653 497.166   7
  -2  -6   5 517.577 543.418   6
  -2   6   5 138.426 360.911   4
   2   6  -5-132.282 487.519   2
  -2   6   5 840.272 477.811   3
  -2   6   4 102400. 3038.66   4
  -2   6   4 96211.7 3000.04   2
  -2   6   4 102050. 3293.00   7
  -2   6   4 98176.5 3022.49   3
   2   6  -4 103220. 3146.83   2
  -2  -6   4 102114. 2956.54   6
   2  -6  -3 6442.06 286.902   6
  -2   6   3 8058.45 777.690   4
   2   6  -3 8354.29 934.797   2
  -2  -6   3 6929.63 681.873   6
  -2   6   3 6369.85 817.371   7
  -2   6   3 7467.39 809.145   3
  -2   6   3 7240.16 812.221   2
  -2   6   2 21943.5 1282.33   3
  -2  -6   2 21408.3 1059.38   6
   2   6  -2 21675.4 1341.31   2
  -2   6   2 22818.6 1367.59   7
  -2   6   2 22625.0 1300.24   2
   2   6  -1 5703.58 845.268   3
   2   6  -1 5450.22 799.279   2
  -2  -6   1 5038.72 503.981   6
  -2   6   1 4893.79 669.723   3
  -2   6   1 5075.97 737.547   2
  -2  -6   0 211072. 4314.74   6
  -2   6   0 210496. 5118.38   3
   2   6   0 225499. 5299.93   2
  -2   6   0 212468. 5086.41   2
   2   6   0 213335. 5198.54   3
  -2  -6  -1 31662.7 985.372   6
   2   6   1 32176.7 1660.89   4
  -2   6  -1 29635.0 1521.39   2
  -2   6  -1 28410.5 1498.42   3
   2   6   1 31591.5 1662.29   2
  -2   6  -2 13598.6 782.000   1
   2   6   2 16044.9 1196.78   4
  -2   6  -2 14231.2 1061.99   2
  -2  -6  -2 15656.9 905.891   5
  -2   6  -2 13814.6 1104.13   3
   2   6   2 14662.5 1143.63   2
  -2   6  -3 3028.68 531.922   1
  -2   6  -3 2868.53 580.663   2
  -2   6  -3 3127.09 661.964   3
  -2  -6  -3 3164.31 453.623   5
   2   6   3 3721.20 700.951   4
   2   6   3 4793.03 807.512   2
  -2   6  -4 36256.4 1752.37   3
  -2   6  -4 36186.0 1524.88   1
   2   6   4 36611.0 1902.01   4
   2   6   4 35711.2 1755.78   2
  -2   6  -4 34931.3 1636.94   2
  -2  -6  -4 35757.6 1406.41   5
   2   6   5 4812.20 794.162   4
  -2  -6  -5 5093.09 597.412   5
   2   6   5 5595.47 787.504   2
  -2   6  -5 4872.94 670.555   1
  -2   6  -5 5468.66 754.035   3
   2   6   6 90215.1 3311.21   4
  -2   6  -6 84733.6 2882.82   1
  -2   6  -6 82610.3 2837.40   3
   2   6   6 86155.6 2843.78   2
  -2  -6  -6 84488.4 2612.94   5
  -2   6  -7 5896.48 774.759   3
  -2  -6  -7 6020.46 616.081   1
  -2   6  -7 5355.23 836.722   1
   2   6   7 6073.22 1018.94   4
   2   6   7 6060.20 771.229   2
   2   6   7 6151.96 826.867   7
  -2  -6  -7 4528.47 626.253   5
  -2   6  -8 8695.08 869.706   3
  -2  -6  -8 7612.44 837.039   5
   2   6   8 8396.99 862.501   2
  -2   6  -8 9037.67 1061.62   1
   2   6   8 9137.19 1119.63   4
  -2  -6  -8 8572.36 736.445   1
   2   6   8 9072.75 991.181   7
   2   6   9 2099.80 506.817   2
   2   6   9 1169.78 505.669   4
   2   6   9 2785.25 682.653   7
  -2  -6  -9 2625.74 490.122   1
   2  -6   9 1738.94 689.686   6
  -2   6  -9 1718.47 620.496   1
  -2   6  -9 1672.41 471.017   3
   2   6  10 39793.0 2414.69   4
   2  -6  10 41620.3 2364.58   6
  -2   6 -10 38658.9 2283.47   1
   2   6  10 35606.2 2007.57   7
   2   6  11 590.857 392.975   7
  -2   6 -11 1013.48 606.078   1
   2  -6  11 928.212 701.876   6
   2   6  11 992.297 786.652   4
   2   6  12 6995.21 942.009   7
   2   6  12 8673.25 1274.32   4
   2  -6  12 7286.56 1179.19   6
   2   6  13 36.6383 398.203   7
   2  -6  13 698.019 957.308   6
   2   6  13-92.0769 670.785   4
   2  -6  14 16528.9 1850.49   6
   2   6  14 11405.7 1507.91   4
   2   6  15-415.543 595.046   4
   2  -6  15 1669.45 971.011   6
  -2   7  16-1210.27 692.800   4
  -2   7  15 5551.87 986.319   4
  -2   7  15 6271.17 1074.78   7
  -2  -7  14 6034.19 1172.50   6
  -2   7  14 5658.25 983.621   4
  -2   7  14 6016.61 1016.62   7
  -2   7  13 798.108 550.561   7
  -2   7  13 637.409 482.010   4
  -2  -7  13 934.420 775.590   6
  -2   7  12 5439.04 870.287   4
  -2   7  12 5005.34 947.293   7
  -2  -7  12 5481.20 1083.97   6
  -2   7  11 13233.1 1349.09   7
  -2  -7  11 11246.5 1322.05   6
  -2   7  11 9801.60 1121.81   4
  -2  -7  10 10721.5 1229.25   6
  -2   7  10 9102.72 1168.85   7
  -2   7  10 9473.82 1056.92   4
  -2   7   9 6075.56 793.910   3
   2   7  -9 5713.41 787.675   2
  -2   7   9 5110.69 905.413   7
  -2  -7   9 6097.04 932.949   6
  -2   7   9 7019.74 915.444   4
  -2   7   8 63770.8 2847.32   7
  -2   7   8 55988.6 2482.72   4
   2   7  -8 60036.2 2447.20   2
  -2   7   8 59614.1 2393.47   3
  -2  -7   8 59426.7 2629.60   6
  -2   7   7 22010.1 1431.10   4
   2   7  -7 19726.7 1369.18   2
  -2   7   7 20219.8 1356.12   3
  -2  -7   7 20611.9 1453.49   6
  -2   7   7 20228.8 1568.65   7
   2   7  -6 6914.14 908.180   2
  -2   7   6 6985.03 915.166   7
  -2   7   6 6374.72 817.032   4
  -2  -7   6 4316.81 777.924   6
  -2   7   6 5309.08 771.884   3
  -2  -7   5 40209.2 1830.20   6
  -2   7   5 37589.5 1865.03   4
   2   7  -5 39597.9 1944.66   2
  -2   7   5 41498.2 2161.61   7
  -2   7   5 40352.9 1904.42   3
   2   7  -4 7462.05 919.245   2
  -2   7   4 8121.38 995.589   7
  -2  -7   4 7421.09 786.742   6
  -2   7   4 9915.82 1013.98   3
  -2   7   4 9373.22 907.085   4
  -2   7   4 9864.81 978.009   2
  -2   7   3 1725.58 566.062   3
  -2   7   3 1145.77 479.806   4
   2   7  -3 850.621 584.689   2
  -2  -7   3 2190.61 545.481   6
  -2   7   3 1301.17 541.266   2
  -2   7   3 1657.32 629.676   7
  -2   7   2 48258.2 2144.95   3
   2   7  -2 54233.4 2284.66   2
  -2  -7   2 50314.1 1762.74   6
  -2   7   2 46847.4 2097.95   2
  -2  -7   1 120531. 2937.32   6
  -2   7   1 118844. 3616.34   3
  -2   7   1 113905. 3517.67   2
   2   7  -1 121368. 3708.71   2
   2   7  -1 118195. 3690.61   3
   2   7   0 3142.43 804.160   2
   2   7   0 3735.52 895.592   3
  -2  -7   0 2568.97 361.804   6
  -2   7   0 2319.68 635.247   2
  -2   7   0 2608.81 668.148   3
  -2  -7  -1 67110.5 1660.13   6
   2   7   1 63882.9 2579.28   2
  -2   7  -1 64857.3 2474.85   2
  -2   7  -1 61987.6 2504.89   3
  -2  -7  -1 63329.8 2127.81   5
   2   7   1 63250.5 2535.11   3
   2   7   1 68699.1 2652.26   4
  -2   7  -2 28360.3 1589.02   2
   2   7   2 30840.9 1752.37   4
  -2   7  -2 30155.8 1708.81   3
   2   7   2 33093.6 1802.05   2
  -2  -7  -2 30459.6 1345.90   5
  -2   7  -3 10372.0 1047.04   3
   2   7   3 10891.4 1130.43   4
   2   7   3 9155.97 1024.07   2
  -2  -7  -3 10311.9 739.533   5
  -2   7  -3 8502.66 928.424   2
   2   7   4 6388.63 938.173   2
   2   7   4 6491.83 941.600   4
  -2   7  -4 5583.42 865.816   3
  -2  -7  -4 5027.50 564.912   5
  -2   7  -4 5803.26 806.661   2
  -2   7  -5 141036. 4094.90   2
   2   7   5 153571. 4314.11   2
   2   7   5 154574. 4703.19   4
  -2  -7  -5 148880. 3710.05   5
  -2   7  -5 146485. 4310.48   3
  -2   7  -6 1647.88 569.556   3
  -2  -7  -6 2832.69 516.557   5
   2   7   6 2070.23 685.552   4
   2   7   6 2146.78 626.007   2
  -2   7  -7 33494.2 1837.34   3
   2   7   7 33306.8 1787.06   2
   2   7   7 33542.9 2104.15   4
  -2  -7  -7 34135.8 1610.24   5
   2  -7   8 14464.8 1371.43   6
   2   7   8 15430.8 1459.64   4
  -2   7  -8 14721.8 1208.94   3
   2   7   8 14184.4 1143.85   2
  -2  -7  -8 13270.4 1063.37   5
   2   7   9 11252.8 1018.39   2
   2   7   9 7802.94 1157.29   4
   2  -7   9 10280.3 1214.63   6
  -2   7  -9 11133.4 1040.88   3
   2   7  10 535.886 589.763   4
   2  -7  10-68.2720 656.065   6
   2   7  10-670.967 552.571   7
   2  -7  11 24363.2 1944.39   6
   2   7  11 22393.7 1937.46   4
   2   7  11 20387.8 1628.57   7
   2   7  12 18389.5 1589.63   7
   2  -7  12 18795.2 1829.28   6
   2   7  12 15365.4 1639.56   4
   2  -7  13 776.071 681.626   6
   2   7  13 777.873 481.444   7
   2   7  13 72.4369 611.108   4
   2   7  14 225.091 654.809   4
   2  -7  14 1033.30 708.356   6
   2   7  15 4341.33 1100.66   4
  -2   8  15-406.177 493.705   4
  -2   8  14 1737.86 747.364   7
  -2  -8  14-381.303 826.082   6
  -2   8  14 1152.30 505.570   4
  -2   8  13 8921.66 1177.50   4
  -2  -8  13 8688.28 1331.87   6
  -2   8  13 10141.7 1311.71   7
  -2   8  12-265.553 558.463   4
  -2   8  12 893.276 654.016   7
  -2  -8  12 12.3763 594.732   6
  -2   8  11 2732.92 704.765   4
  -2  -8  11 1885.34 805.624   6
  -2   8  11 2221.60 699.467   7
  -2   8  10 932.442 524.117   4
  -2  -8  10 425.454 522.372   6
  -2   8  10 834.535 662.747   7
  -2   8   9 5224.29 938.397   7
  -2   8   9 5357.67 863.173   4
  -2   8   9 5470.91 822.357   3
   2   8  -9 4285.03 722.260   2
  -2  -8   9 4971.67 908.777   6
  -2   8   8 4944.74 820.187   3
  -2   8   8 5547.02 856.142   4
   2   8  -8 6168.42 910.263   2
  -2  -8   8 4709.75 856.353   6
  -2   8   8 6106.11 1004.12   7
  -2   8   7 20300.0 1500.15   4
  -2  -8   7 20541.1 1496.96   6
   2   8  -7 18564.3 1405.56   2
  -2   8   7 21239.8 1487.93   3
   2   8  -6 65.5805 523.543   2
  -2   8   6 296.061 467.036   3
  -2   8   6 679.839 426.985   4
  -2  -8   6 436.806 489.310   6
  -2   8   6 1083.01 644.300   7
  -2   8   5 6414.00 897.902   3
   2   8  -5 6987.95 931.899   2
  -2   8   5 6335.17 977.392   7
  -2   8   5 6503.85 848.228   4
  -2  -8   5 6427.01 810.982   6
  -2   8   4 936.011 490.955   4
   2   8  -4 485.768 492.507   2
  -2   8   4 1072.84 583.961   7
  -2  -8   4-224.286 381.015   6
  -2   8   4-50.6270 519.825   3
  -2   8   4 871.705 535.664   2
  -2  -8   3 122661. 3376.69   6
  -2   8   3 124781. 3874.71   2
   2   8  -3 121272. 3978.78   2
  -2   8   3 121095. 3879.51   3
   2   8  -2 6019.73 944.453   2
  -2   8   2 5426.31 847.158   3
  -2  -8   2 5245.25 604.774   6
  -2   8   2 6468.64 889.846   2
  -2   8   1 21202.0 1460.58   2
  -2  -8   1 20530.0 1022.08   6
   2   8  -1 21562.0 1533.79   2
  -2   8   1 19748.3 1464.68   3
  -2   8   0 2803.98 722.235   3
   2   8   0 4872.99 906.756   2
  -2  -8   0 3148.47 377.602   6
   2  -8   0 2529.37 411.973   6
  -2   8   0 4148.84 804.329   2
   2   8   1 69967.5 2840.63   2
  -2   8  -1 65965.4 2666.85   2
  -2   8  -1 66962.4 2793.52   3
  -2  -8  -1 67323.7 2281.76   5
   2   8   2 1060.38 645.946   2
  -2  -8  -2 3133.53 498.718   5
   2   8   2 2124.19 674.745   4
  -2   8  -2 3137.81 747.483   2
  -2   8  -2 2995.45 771.599   3
   2   8   3 199245. 5335.62   2
   2   8   3 201545. 5582.97   4
  -2   8  -3 183813. 5218.57   3
  -2  -8  -3 179610. 4292.46   5
  -2   8  -3 181640. 5047.40   2
  -2  -8  -4 815.677 312.609   5
   2   8   4 366.424 550.690   2
  -2   8  -4 691.635 572.953   3
   2   8   4 704.155 515.412   4
  -2   8  -4 369.260 471.804   2
  -2  -8  -5 1574.13 399.664   5
  -2   8  -5 1025.54 608.642   3
   2   8   5 1763.37 631.372   2
  -2   8  -5 701.299 540.923   2
   2   8   5 917.550 563.548   4
   2  -8   5 1054.97 549.298   6
   2   8   6 6984.01 1072.53   4
   2   8   6 6100.96 892.092   2
   2  -8   6 5597.19 850.754   6
  -2  -8  -6 6555.54 701.754   5
  -2   8  -6 5557.28 898.069   3
   2  -8   7 44351.4 2307.73   6
  -2   8  -7 42531.0 2203.62   3
   2   8   7 43193.0 2480.22   4
  -2  -8  -7 41911.0 1837.13   5
   2   8   7 42036.2 2168.12   2
   2   8   8 3229.08 841.606   4
  -2   8  -8 2293.14 667.812   3
   2   8   8 3572.52 777.512   2
   2  -8   8 2073.31 743.729   6
   2   8   9 41767.3 2533.93   4
   2  -8   9 39913.0 2364.32   6
   2   8   9 36825.1 1966.29   2
  -2   8  -9 36710.3 2072.08   3
   2   8  10 1210.60 738.918   4
   2  -8  10-143.273 668.231   6
   2   8  11 1033.47 671.197   4
   2  -8  11 726.855 753.739   6
   2   8  12 4554.77 993.876   4
   2  -8  12 6575.47 1186.86   6
   2   8  13 15187.0 1739.27   4
   2  -8  13 14014.0 1695.51   6
   2   8  14 2545.25 931.051   4
   2  -8  14 3971.32 1025.19   6
  -2   9  14 1908.13 669.185   4
  -2   9  13 3513.42 808.814   4
  -2  -9  13 4430.00 1164.63   6
  -2   9  13 5079.54 1021.99   7
  -2   9  12 1119.47 692.570   7
  -2  -9  12 1569.12 754.187   6
  -2   9  12 2044.62 703.238   4
  -2   9  11 3293.75 825.546   4
  -2   9  11 2923.46 852.168   7
  -2  -9  11 4547.41 1023.83   6
  -2   9  10 724.829 511.490   4
  -2  -9  10 1264.98 737.236   6
  -2   9  10 1162.14 701.389   7
  -2  -9   9 17994.0 1533.74   6
  -2   9   9 18701.2 1493.61   3
  -2   9   9 19653.9 1822.56   7
  -2   9   9 18173.9 1557.63   4
   2   9  -9 19992.2 1559.16   2
  -2   9   8 12352.0 1424.54   7
  -2   9   8 9802.98 1126.30   4
   2   9  -8 13519.0 1249.75   2
  -2  -9   8 10950.0 1215.21   6
  -2   9   8 15418.1 1366.25   3
   2   9  -7 924.141 639.721   2
  -2   9   7 1226.38 613.494   7
  -2   9   7 867.846 645.076   3
  -2   9   7 337.617 453.620   4
  -2  -9   7 1007.39 622.927   6
   2   9  -6 31.6865 541.683   2
  -2   9   6 863.830 577.391   3
  -2   9   6-69.8426 349.908   4
  -2  -9   6 505.393 470.324   6
  -2   9   6 1196.65 754.262   7
   2   9  -5 18263.1 1514.37   2
  -2   9   5 17219.9 1426.25   4
  -2  -9   5 15535.7 1191.87   6
  -2   9   5 17205.5 1441.54   3
  -2  -9   4 8034.83 851.982   6
  -2   9   4 5392.11 850.945   3
  -2   9   4 7039.44 997.941   2
   2   9  -4 7228.00 1063.97   2
   2   9  -3-1120.47 732.972   2
  -2  -9   3 546.713 415.229   6
  -2   9   3 5.23219 541.663   3
  -2   9   3 595.614 529.332   2
  -2   9   2 23715.9 1681.91   3
  -2  -9   2 23315.8 1201.18   6
  -2   9   2 23898.3 1668.72   2
   2   9  -2 23493.9 1746.72   2
  -2   9   1 16978.8 1419.15   3
   2   9  -1 19574.8 1575.73   2
  -2   9   1 14621.7 1366.18   2
   2   9   0 468.018 669.014   2
  -2   9   0-459.608 607.807   2
  -2   9   0-1058.78 708.192   3
  -2   9  -1 29710.3 1894.43   3
   2   9   1 30312.9 1965.02   2
  -2   9  -1 29636.2 1838.68   2
  -2  -9  -1 28527.4 1439.33   5
   2   9   2 29392.3 1942.11   2
   2  -9   2 27183.5 1362.17   6
  -2   9  -2 25353.2 1751.69   2
  -2   9  -2 29642.8 1933.99   3
  -2  -9  -2 27544.0 1329.63   5
  -2   9  -3 1804.05 741.746   3
   2   9   3 913.298 609.387   2
   2  -9   3 1530.89 427.006   6
   2   9   3 2108.67 724.314   4
  -2   9  -3 1359.52 601.896   2
  -2  -9  -3 1440.76 355.133   5
   2   9   4 1641.21 734.244   2
  -2   9  -4 1643.68 635.731   2
  -2   9  -4 1614.05 678.709   3
   2  -9   4 2258.66 596.390   6
   2   9   4 1089.26 613.753   4
   2   9   5 44343.2 2558.45   4
   2   9   5 41854.1 2308.62   2
  -2   9  -5 37177.6 2233.96   3
   2  -9   5 40607.6 2049.29   6
   2  -9   6 4192.11 797.151   6
   2   9   6 2707.35 796.616   2
  -2   9  -6 2893.69 772.659   3
   2   9   6 3118.43 840.168   4
   2   9   7 1739.55 682.127   2
   2   9   7 3978.35 999.640   4
  -2   9  -7 634.109 569.526   3
   2  -9   7 3198.06 755.222   6
  -2   9  -8 10923.9 1215.50   3
   2   9   8 13660.7 1324.54   2
   2  -9   8 14809.8 1473.78   6
   2   9   8 13818.4 1523.26   4
  -2   9  -9 12591.9 1351.93   3
   2   9   9 11333.5 1179.50   2
   2   9   9 13043.8 1523.80   4
   2  -9   9 12747.5 1402.70   6
   2  -9  10 2308.62 817.087   6
   2   9  10 913.607 692.668   4
   2   9  11 8748.59 1353.47   4
   2  -9  11 8627.57 1380.80   6
   2   9  12 5817.48 1173.93   4
   2  -9  12 4002.43 977.965   6
   2   9  13 2972.34 876.924   4
   2  -9  13 1491.67 992.471   6
  -2  10  13 723.710 546.163   4
  -2  10  12 3987.10 1042.24   7
  -2  10  12 3391.69 825.720   4
  -2 -10  12 3700.08 981.432   6
  -2  10  11 5037.33 1108.74   7
  -2 -10  11 4749.83 991.674   6
  -2  10  11 4938.33 978.357   4
  -2  10  10 26661.8 2194.12   7
  -2  10  10 21259.4 1834.56   4
  -2 -10  10 27148.1 2017.89   6
  -2  10   9 658.301 465.817   4
  -2  10   9 75.3696 587.825   7
  -2  10   9 284.347 564.913   3
  -2 -10   9 570.008 634.453   6
   2  10  -9 1861.43 687.929   2
  -2 -10   8 3414.13 820.975   6
  -2  10   8 3290.74 777.278   4
  -2  10   8 4572.67 885.931   3
   2  10  -8 2797.19 755.890   2
   2  10  -7 94.3708 628.225   2
  -2  10   7 1229.88 624.979   4
  -2 -10   7 715.973 507.096   6
  -2  10   7-34.4990 529.376   3
   2  10  -6 22179.2 1795.11   2
  -2  10   6 23749.1 1785.12   4
  -2 -10   6 22701.6 1516.75   6
  -2  10   6 22508.9 1762.53   3
  -2  10   5 2296.68 718.115   3
  -2 -10   5 2526.37 629.767   6
   2  10  -5 2282.37 755.217   2
  -2  10   4 21426.6 1699.12   3
  -2 -10   4 18289.5 1258.30   6
   2  10  -4 19430.3 1679.10   2
  -2  10   4 17321.0 1544.06   2
   2  10  -3 4816.14 1025.83   2
  -2  10   3 4787.83 889.728   3
  -2  10   3 5121.92 963.610   2
   2  10  -2 810.733 574.274   2
  -2  10   2 121.771 651.317   3
  -2  10   2-409.681 549.645   2
  -2  10   1 1423.25 724.393   3
   2  10  -1 2538.58 787.777   2
  -2  10   1 2867.51 761.425   2
  -2  10   0 7102.10 1068.29   3
   2  10   0 8713.67 1230.89   2
  -2  10   0 8418.49 1134.96   2
  -2  10  -1 5476.99 1006.48   3
   2  10   1 8127.04 1158.01   2
  -2  10  -1 5663.60 952.510   2
  -2  10  -2 1392.93 618.915   3
   2  10   2 2566.30 810.168   2
  -2  10  -2 165.743 485.062   2
   2  10   3 2445.33 799.822   2
  -2  10  -3 1873.59 714.653   3
  -2  10  -3 3863.19 874.426   2
   2  10   4 8383.31 1211.30   4
   2 -10   4 7685.27 904.426   6
  -2  10  -4 5420.10 866.964   2
  -2  10  -4 7772.29 1145.37   3
   2  10   4 8632.41 1166.24   2
   2  10   5 1322.04 734.560   2
  -2  10  -5 288.728 526.249   3
   2 -10   5 28.9341 434.911   6
   2  10   5 903.560 617.372   4
   2  10   6 1547.65 658.102   2
   2  10   6 2360.96 803.588   4
  -2  10  -6 3168.86 889.292   3
   2  10   7 3559.71 866.093   2
  -2  10  -7 2619.12 840.847   3
   2  10   7 4373.38 1023.53   4
   2 -10   7 4019.49 838.061   6
   2  10   8 3348.60 793.570   2
   2  10   8 4016.60 938.512   4
  -2  10  -8 3832.38 896.884   3
   2 -10   8 4856.92 940.294   6
  -2  10  -9 2057.09 799.268   3
   2 -10   9 1858.50 847.019   6
   2  10   9 1852.30 710.711   4
   2  10  10 19906.6 1946.12   4
   2 -10  10 19123.2 1856.05   6
   2 -10  11 1897.81 928.160   6
   2  10  11 2089.21 860.948   4
   2 -10  12 1494.16 852.229   6
  -2  11  11 152.966 521.087   4
  -2 -11  11 1911.99 808.008   6
  -2 -11  10-867.195 710.232   6
  -2  11  10 818.657 637.432   4
  -2  11   9 63.0383 520.207   4
   2  11  -9 98.2381 560.177   2
  -2 -11   9 828.766 715.569   6
  -2 -11   8 17313.0 1499.37   6
   2  11  -8 14602.4 1515.91   2
  -2  11   8 18777.9 1763.61   4
  -2  11   8 20747.1 1811.39   3
   2  11  -7 339.337 515.014   2
  -2  11   7 206.031 504.215   4
  -2 -11   7 608.444 601.106   6
  -2  11   7 1461.91 796.207   3
   2  11  -6 20720.8 1808.58   2
  -2  11   6 15657.6 1576.48   3
   2  11  -5 650.404 516.660   2
  -2  11   5 1350.27 706.823   3
   2  11  -4 871.228 620.300   2
  -2  11   4 1837.03 853.030   3
   2  11  -3 1215.90 676.498   2
  -2  11   3 1882.66 737.811   3
  -2  11   2 12929.8 1436.48   2
   2  11  -2 10145.2 1367.30   2
  -2  11   2 11946.4 1404.26   3
   2  11  -1 1038.60 689.970   2
  -2  11   1-371.478 629.187   3
  -2  11   1 575.783 592.930   2
   2  11   0-1055.44 721.870   2
  -2  11   0-1394.83 786.152   2
  -2  11   0 334.771 669.071   3
  -2  11  -1 849.797 704.625   2
   2  11   1 78.0433 580.337   2
  -2  11  -1 1054.17 829.557   3
   2  11   2 2738.35 859.685   2
  -2  11  -2 3161.37 798.774   2
  -2  11  -2 3722.81 968.381   3
   2  11   3 1140.50 684.874   2
  -2  11  -3-943.538 785.657   3
  -2  11  -4 402.287 627.677   3
   2  11   4-242.921 578.252   2
   2  11   5 501.414 725.245   2
   2  11   5 1001.00 672.048   4
  -2  11  -5 450.258 660.230   3
   2  11   6 8325.51 1178.33   2
  -2  11  -6 8327.85 1312.70   3
   2  11   6 7677.43 1273.94   4
   2  11   7 937.410 689.327   2
  -2  11  -7 63.3184 698.621   3
   2  11   7 1487.44 838.953   4
   2 -11   7 165.073 499.586   6
  -2  11  -8 4763.23 1014.54   3
   2 -11   8 6254.48 1101.03   6
   2  11   8 5622.26 1162.01   4
   2  11   8 5989.45 1038.15   2
   2 -11   9-969.261 638.278   6
  -2  11  -9 340.954 691.501   3
   2  11   9-217.607 649.983   4
   2  11  10 2018.77 816.820   4
   2 -11  10 2576.26 899.205   6
   2 -11  11 1449.55 736.008   6
  -2  12   9 712.393 586.514   4
  -2  12   8 732.563 676.413   3
   2  12  -8-140.189 574.942   2
   2  12  -7 307.280 576.189   2
  -2  12   7 1420.31 756.086   3
  -2  12   6 8631.99 1324.57   3
   2  12  -6 6275.96 1139.95   2
   2  12  -5 699.198 635.820   2
  -2  12   5 793.125 696.340   3
   2  12  -4 8956.35 1280.27   2
  -2  12   4 9229.54 1406.76   3
   2  12  -3 2149.35 847.989   2
  -2  12   3 2312.48 957.199   3
   2  12  -2 2182.81 913.227   2
  -2  12   2 546.602 695.223   3
   2  12  -1 3341.73 943.802   2
  -2  12   1 4160.24 1088.35   3
   2  12   0 3703.85 952.968   2
  -2  12   0 6058.44 1190.60   3
   2  12   1 495.104 671.053   2
  -2  12  -1 2596.50 968.484   3
   2  12   2 1344.69 871.194   2
  -2  12  -2 533.556 865.227   3
  -2  12  -3 3322.63 996.962   3
   2  12   3 2733.12 986.269   2
   2  12   4 2999.00 821.255   2
  -2  12  -4 3214.57 1043.51   3
   2  12   5 1265.49 653.583   2
  -2  12  -5-103.018 660.901   3
   2  12   6 6136.66 1140.97   2
   2  12   6 6618.50 1243.86   4
  -2  12  -6 5502.51 1260.97   3
  -2  12  -7 5131.56 1147.54   3
   2  12   7 3457.30 913.062   4
   2  12   7 1508.82 694.733   2
   2  12   8 1815.27 786.897   4
  -2  12  -8 2796.49 1008.29   3
   2  12   8 2424.52 845.057   2
  -2  12  -9 2539.55 881.800   3
  -2  13   7 3289.20 993.862   3
  -2  13   6 1021.42 710.230   3
   2  13  -6 862.321 624.655   2
  -2  13   5 4388.81 1144.74   3
   2  13  -5 4096.57 1013.17   2
  -2  13   4 3316.71 1063.43   3
   2  13  -4-245.492 674.314   2
  -2  13   3 1441.61 940.054   3
   2  13  -3 503.429 583.869   2
  -2  13   2 1383.14 825.343   3
   2  13  -2-1125.18 901.480   2
  -2  13   1 16644.8 1880.96   3
   2  13  -1 18937.4 1945.29   2
   2  13   0-488.985 696.187   2
  -2  13   0 1084.80 829.938   3
  -2  13  -1 13437.1 1755.68   3
   2  13   1 7951.29 1361.70   2
  -2  13  -2 445.952 903.480   3
   2  13   2-617.621 783.938   2
  -2  13  -3 3027.45 1081.38   3
   2  13   3 555.793 670.290   2
  -2  13  -4 2602.33 989.769   3
   2  13   4 6.98257 621.330   2
  -2  13  -5 12085.7 1705.32   3
   2  13   5 11668.7 1548.53   2
  -2  13  -6 1650.09 832.535   3
   2  13   6 851.224 747.151   2
  -2  13  -7 3205.87 1155.17   3
  -3   0  18 22987.2 2001.10   6
  -3   0  18 25416.5 2046.12   7
  -3   0  17 266.860 562.732   6
  -3   0  16 5744.66 1041.65   6
  -3   0  15 1013.93 733.982   6
  -3   0  14 27587.7 1894.31   6
  -3   0  13 822.407 628.511   6
  -3   0  12 126386. 4039.67   6
  -3   0  11 299.675 489.922   6
  -3   0  10 367.205 457.978   6
  -3   0   9 164.347 503.939   6
  -3   0   8 178552. 4418.54   6
  -3   0   8 178491. 3499.99   3
  -3   0   7 663.980 384.261   6
  -3   0   6 386204. 7680.13   6
  -3   0   5 507.389 359.671   6
  -3   0   4 25694.7 1063.26   6
  -3   0   3-9.07471 261.303   6
  -3   0   2 13683.2 671.904   6
  -3   0   1 548.517 257.245   6
  -3   0   0 3908.18 451.638   6
  -3   0   0 4805.27 443.229   5
  -3   0  -1-157.289 263.335   5
  -3   0  -2 21855.6 917.468   5
  -3   0  -3 133.270 298.730   5
  -3   0  -4 71875.9 2104.93   5
   3   0   5 124.063 83.2602   7
  -3   0  -5 177.045 323.922   5
  -3   0  -6 402788. 7994.63   1
  -3   0  -6 385223. 7986.84   5
   3   0   6 387421. 7006.06   7
   3   0   7-81.1611 143.454   7
  -3   0  -7 696.221 448.350   1
  -3   0  -8 99134.1 2324.73   3
  -3   0  -8 95518.8 3112.88   1
  -3   0  -9-316.640 510.608   1
   3   0   9 402.216 250.255   7
  -3   0  -9-19.1211 150.836   3
  -3   0 -10 6556.69 937.389   1
   3   0  10 6115.43 547.208   7
  -3   0 -11 189.310 500.593   1
  -3   0 -12 149098. 4767.45   1
  -3   0 -13 397.718 632.560   1
   3   0  14 38782.6 2372.39   6
  -3   0 -14 35678.3 2323.72   1
  -3   0 -15-883.575 674.868   1
   3   0  15 32.3609 533.998   6
   3   0  16 7703.13 1176.27   6
  -3   0 -16 6770.53 1224.86   1
   3   0  17-344.608 595.525   6
  -3   0 -17 570.186 754.843   1
   3   0  18 8726.10 1323.35   6
  -3   1  18 1133.08 524.704   7
  -3   1  17 3570.73 824.850   4
  -3   1  17 3422.91 885.239   6
  -3   1  17 4900.61 975.670   7
  -3  -1  17 3867.43 1038.05   6
  -3   1  16 26191.6 1943.21   7
  -3  -1  16 22129.4 1878.06   6
  -3   1  16 20479.1 1720.98   6
  -3   1  15 608.067 564.107   6
  -3  -1  15 450.090 590.135   6
  -3   1  14 13378.1 1284.67   6
  -3  -1  14 13033.2 1341.75   6
  -3  -1  13 15805.5 1416.57   6
  -3   1  13 15985.1 1317.98   6
  -3   1  12 37879.8 1967.87   6
  -3  -1  12 39052.5 2131.77   6
  -3   1  11 18418.9 1287.53   6
  -3  -1  11 16209.1 1319.83   6
  -3  -1  10 101652. 3326.81   6
  -3   1  10 99358.7 3124.66   6
  -3   1   9 14334.1 1044.94   6
  -3  -1   9 15864.0 1188.71   6
  -3   1   8 42648.4 1717.96   6
  -3  -1   8 44058.3 1888.23   6
  -3   1   8 40619.6 1181.46   3
  -3   1   7 32253.7 1413.93   6
  -3   1   7 33703.9 1053.89   3
  -3  -1   7 31554.4 1492.02   6
  -3  -1   6 70817.4 2261.47   6
  -3   1   6 73859.5 2139.64   6
  -3   1   6 72931.4 1796.71   3
  -3   1   5 10256.1 677.508   6
  -3   1   5 10152.2 552.063   3
  -3  -1   5 9456.07 736.426   6
  -3   1   4 238756. 4823.76   6
  -3  -1   4 238074. 4976.30   6
  -3   1   3 238998. 4366.63   4
  -3  -1   3 241335. 4897.82   6
  -3   1   3 238143. 4741.87   6
  -3  -1   2 35586.2 1180.34   6
  -3  -1   2 34018.3 863.448   4
  -3   1   2 34898.9 1124.32   6
  -3   1   2 32319.9 728.466   4
  -3  -1   1 22101.3 654.550   4
  -3  -1   1 24594.8 906.486   6
   3   1  -1 22376.8 673.987   4
  -3  -1   0 311283. 5783.91   4
  -3   1   0 321123. 5948.63   5
   3   1   0 311667. 5821.61   4
  -3  -1   0 331812. 6145.44   6
   3   1   1 50154.2 1435.41   4
  -3  -1  -1 51377.1 1571.03   5
  -3   1  -1 52057.5 1394.20   5
  -3   1  -1 49534.4 1159.71   7
  -3   1  -2 1897.43 351.750   5
  -3   1  -2 1627.87 127.083   7
  -3  -1  -2 2137.57 404.560   5
  -3  -1  -3 70451.4 1961.00   5
  -3  -1  -3 67490.3 1455.77   7
  -3   1  -3 67529.0 1909.59   5
  -3   1  -4 274817. 5705.91   5
  -3  -1  -4 275582. 5674.46   5
  -3   1  -5 6299.39 660.183   1
  -3  -1  -5 5634.82 593.409   5
   3   1   5 5833.75 375.643   7
  -3   1  -5 6765.26 487.622   3
  -3   1  -6 119978. 2709.30   3
  -3   1  -6 119659. 3259.05   1
  -3  -1  -6 121167. 3257.65   5
   3   1   6 112142. 2543.88   7
   3   1   7 16630.9 761.977   7
  -3  -1  -7 19284.0 1203.47   5
  -3  -1  -7 18586.9 1172.97   1
  -3   1  -7 16835.8 774.982   3
  -3   1  -7 17604.7 1167.65   1
  -3   1  -8 41690.2 1282.86   3
  -3   1  -8 40626.1 1902.58   1
   3   1   8 39505.4 1342.49   7
  -3  -1  -8 39875.7 1818.79   1
  -3   1  -9 879.252 589.190   1
  -3   1  -9 1160.38 250.936   3
   3   1   9 1129.47 280.856   7
   3   1  10 78268.1 2285.85   7
  -3  -1 -10 82988.2 2985.42   1
  -3   1 -10 80861.7 3051.23   1
  -3   1 -11 5466.43 921.644   1
  -3  -1 -11 6922.24 966.129   1
  -3  -1 -12 13393.4 1312.14   1
  -3   1 -12 13549.1 1426.88   1
   3   1  13 7979.06 1086.65   6
  -3  -1 -13 7244.77 1096.33   1
  -3   1 -13 7825.47 1149.00   1
  -3  -1 -14 19868.5 1728.23   1
  -3   1 -14 19658.7 1800.43   1
   3  -1  14 18151.1 1693.65   6
   3   1  14 18282.9 1582.10   6
  -3   1 -15 2793.96 961.536   1
  -3  -1 -15 106.072 679.858   1
   3  -1  15 2309.54 939.899   6
   3   1  15 925.837 672.114   6
  -3  -1 -16 10883.7 1414.27   1
   3  -1  16 10216.9 1397.22   6
   3   1  16 8087.99 1154.18   6
  -3   1 -16 9528.63 1420.52   1
  -3  -1 -17 7503.84 1281.34   1
   3  -1  17 8532.48 1354.75   6
   3   1  17 8659.84 1276.06   6
  -3   1 -17 10354.7 1569.23   1
  -3  -1 -18 751.306 767.122   1
  -3   2  18 1265.83 668.579   7
  -3  -2  17 428.831 791.103   6
  -3   2  17 1305.52 639.593   4
  -3   2  17 743.814 519.012   7
  -3   2  16-169.421 382.735   4
  -3  -2  16 985.213 616.056   6
  -3   2  16 355.924 507.564   7
  -3   2  15 24071.2 1785.75   4
  -3   2  15 23378.2 1781.56   7
  -3  -2  15 23760.0 1916.51   6
  -3   2  15 23333.7 1686.20   6
  -3   2  14 2249.52 685.587   4
  -3   2  14 1414.61 525.886   6
  -3  -2  14 1384.69 691.971   6
  -3   2  14 2393.46 614.261   7
  -3   2  13 3624.47 789.086   7
  -3   2  13 4350.88 745.521   4
  -3  -2  13 3853.08 867.422   6
  -3   2  13 3324.12 707.588   6
  -3   2  12 2659.33 627.593   4
  -3   2  12 1551.29 566.204   6
  -3  -2  12 2006.46 708.251   6
  -3   2  11 30038.6 1663.88   4
  -3   2  11 28358.2 1551.02   6
  -3  -2  11 30784.1 1834.14   6
  -3   2  10 1617.43 462.845   4
  -3  -2  10 1077.89 608.463   6
  -3   2  10 1073.43 450.607   6
  -3   2   9 23294.4 1297.10   4
  -3   2   9 21344.4 1206.92   6
  -3  -2   9 23147.5 1503.96   6
  -3   2   9 20852.1 860.949   3
  -3   2   8 42197.7 1698.56   4
  -3   2   8 43569.4 1674.93   6
  -3   2   8 42819.0 1327.53   3
  -3  -2   8 44660.8 1947.77   6
  -3   2   7 39522.7 1518.97   4
  -3   2   7 38519.7 1489.10   6
  -3  -2   7 41485.0 1771.60   6
  -3   2   7 38046.3 1270.80   3
  -3   2   6 60.0253 199.952   3
  -3   2   6 322.449 254.360   4
  -3   2   6 336.431 284.854   6
  -3  -2   6 286.521 465.267   6
  -3   2   5 173152. 3684.81   4
  -3  -2   5 170544. 4049.01   6
  -3   2   5 168875. 3716.34   6
  -3   2   5 173321. 3647.49   3
  -3   2   4 8969.48 518.359   4
  -3   2   4 9872.39 573.920   6
  -3   2   4 9972.93 592.051   3
  -3  -2   4 8752.60 705.290   6
  -3   2   3 6906.92 475.586   6
  -3   2   3 5772.96 360.253   4
  -3  -2   3 7610.72 609.595   6
  -3   2   3 7965.97 525.458   3
  -3  -2   2 51641.7 1541.99   6
  -3   2   2 51466.6 1541.72   6
  -3   2   2 50069.2 1478.27   3
  -3   2   2 50463.4 1597.98   7
  -3   2   2 47229.6 1194.86   4
   3   2  -1 405939. 7256.95   4
  -3  -2   1 400328. 7344.42   6
  -3   2   1 402811. 7421.48   3
  -3   2   1 395694. 7402.02   7
   3   2   0 3655.20 358.869   4
  -3  -2   0 4002.69 427.150   6
  -3   2   0 4061.68 305.548   5
  -3   2   0 3995.24 431.473   3
  -3   2   0 3599.49 347.021   7
  -3   2  -1 296917. 5620.87   7
   3   2   1 292721. 5948.76   4
  -3   2  -1 306932. 5947.42   3
  -3  -2  -1 321376. 5979.28   6
  -3  -2  -1 316763. 6134.76   5
  -3   2  -1 302803. 5685.61   5
   3   2   2 97904.8 2613.10   4
  -3   2  -2 99121.3 2451.54   3
  -3   2  -2 99432.3 2378.65   5
  -3  -2  -2 106262. 2615.05   5
  -3   2  -3 2161.09 354.791   5
   3  -2   3 1921.92 201.700   7
   3   2   3 2203.65 433.535   4
  -3  -2  -3 2219.41 382.109   5
  -3   2  -3 1795.75 302.582   3
  -3  -2  -4 3064.10 440.527   5
   3   2   4 2946.57 542.529   4
  -3   2  -4 3873.17 534.622   1
  -3   2  -4 2885.36 377.834   3
   3   2   5 118410. 2736.88   7
  -3   2  -5 121566. 3231.35   1
  -3  -2  -5 124804. 3172.81   5
  -3   2  -5 119292. 2851.04   3
   3   2   6 6025.71 494.567   7
  -3   2  -6 6621.30 532.557   3
  -3   2  -6 6916.54 754.155   1
  -3  -2  -6 6257.87 704.872   5
  -3   2  -7 35630.2 1273.14   3
  -3  -2  -7 36804.6 1694.40   5
  -3   2  -7 35000.6 1707.65   1
   3   2   7 33720.1 1274.81   7
  -3  -2  -8 125320. 3567.17   1
  -3   2  -8 126968. 2973.41   3
   3   2   8 129206. 3137.45   7
  -3   2  -8 130791. 3840.17   1
   3   2   9 17034.4 967.342   7
  -3  -2  -9 19914.2 1311.42   1
  -3   2  -9 20576.3 900.170   3
  -3   2  -9 19417.2 1448.74   1
  -3  -2 -10 1024.16 549.012   1
   3   2  10 1545.39 335.321   7
  -3   2 -10 1268.76 646.859   1
   3   2  11 45696.0 1777.99   7
  -3  -2 -11 50146.4 2324.02   1
  -3   2 -11 47847.8 2461.95   1
  -3   2 -12 24674.2 1870.08   1
  -3  -2 -12 23845.0 1683.74   1
  -3   2 -13 2733.28 841.899   1
   3   2  13 1882.55 615.644   6
  -3  -2 -13 1014.92 587.547   1
   3  -2  14 13321.9 1550.16   6
   3   2  14 10655.8 1223.89   6
  -3   2 -14 13431.5 1551.29   1
  -3  -2 -14 11180.4 1273.93   1
  -3  -2 -15 29711.4 2132.83   1
  -3   2 -15 28163.5 2236.47   1
   3  -2  15 31524.5 2334.71   6
   3   2  15 27796.6 1949.13   6
   3   2  16 2834.15 1055.01   4
  -3  -2 -16 2126.05 880.971   1
   3  -2  16 2126.68 940.561   6
  -3   2 -16 3236.34 1009.05   1
  -3  -2 -17 1094.24 626.063   1
  -3   2 -17 1070.57 787.339   1
   3  -2  17 2841.66 941.710   6
   3   2  17 2457.03 1045.48   4
  -3  -2 -18 2488.12 901.330   1
  -3  -3  17 7850.94 1311.08   6
  -3   3  17 7166.90 1076.00   7
  -3   3  16-111.000 428.770   4
  -3   3  16 246.020 467.572   7
  -3  -3  16 1211.43 777.670   6
  -3  -3  15 732.697 737.730   6
  -3   3  15 1841.11 630.338   4
  -3   3  15 1440.56 541.475   7
  -3   3  14 3621.32 708.052   4
  -3  -3  14 3282.95 838.120   6
  -3   3  14 4529.83 863.765   7
  -3   3  13 9624.00 1123.36   7
  -3   3  13 10449.7 990.440   6
  -3   3  13 10785.7 1104.60   4
  -3  -3  13 7631.07 1096.10   6
  -3   3  12 1366.81 467.948   6
  -3   3  12 837.589 420.408   4
  -3   3  12 916.431 412.930   7
  -3  -3  12 883.758 647.864   6
  -3   3  11 999.892 441.477   6
  -3   3  11 875.655 388.853   4
  -3  -3  11 1672.90 754.104   6
  -3   3  11 1352.18 496.247   7
  -3   3  10 2303.26 594.055   7
  -3  -3  10 3805.11 811.781   6
  -3   3  10 3265.38 534.892   6
  -3   3  10 3610.48 596.807   4
  -3   3   9 94986.1 2918.98   4
  -3  -3   9 91347.1 3194.46   6
  -3   3   9 93292.7 2705.32   6
  -3   3   9 93266.9 2396.64   3
   3   3  -9 93032.5 2466.57   2
  -3   3   9 92268.0 3168.07   7
  -3   3   8 248.466 260.551   3
  -3   3   8 180.828 305.287   6
  -3  -3   8-576.492 539.758   6
  -3   3   8-137.926 375.848   7
  -3   3   8 86.1725 283.013   4
  -3   3   7 89061.7 2914.57   7
  -3   3   7 91057.4 2593.45   4
  -3  -3   7 90529.8 2916.85   6
  -3   3   7 91740.8 2389.32   3
  -3   3   7 89250.1 2430.23   6
  -3   3   6 6787.06 608.593   4
  -3   3   6 5617.24 688.059   7
  -3   3   6 6830.48 562.464   3
  -3  -3   6 5817.92 748.250   6
  -3   3   6 5965.27 521.141   6
  -3   3   5 103347. 2497.81   6
  -3   3   5 104144. 2624.65   4
  -3   3   5 109090. 3054.64   7
  -3   3   5 108827. 2676.69   3
  -3  -3   5 103000. 2925.76   6
  -3   3   4 7935.62 601.888   3
  -3   3   4 7295.57 501.642   4
  -3  -3   4 6847.21 658.414   6
  -3   3   4 7089.86 673.920   7
  -3   3   4 7948.60 519.590   6
  -3  -3   3 663498. 12135.0   6
  -3   3   3 661576. 12342.0   7
  -3   3   3 662463. 12058.4   3
  -3   3   3 640062. 11919.5   6
  -3   3   2 35691.0 1285.31   7
  -3   3   2 32983.6 975.561   4
  -3  -3   2 37197.2 1196.57   6
  -3   3   2 35062.8 1199.45   3
  -3   3   1 287309. 4789.86   3
  -3  -3   1 281320. 4553.84   6
  -3   3   0 306.816 139.764   5
  -3  -3   0 342.796 241.642   6
  -3   3   0 171.975 227.454   7
  -3   3   0 505.640 290.338   3
   3   3   0 69.4127 226.894   4
   3  -3   0 135.706 107.110   5
   3   3   1 157863. 3572.64   4
  -3   3  -1 144099. 3240.22   7
  -3  -3  -1 155090. 3573.79   5
  -3  -3  -1 153183. 3342.96   6
  -3   3  -1 144715. 3446.90   3
  -3   3  -2 674.828 313.362   3
   3   3   2 470.856 334.653   4
  -3   3  -2 322.735 264.460   1
  -3  -3  -2-89.4848 280.586   5
  -3  -3  -3 611528. 10804.3   5
  -3   3  -3 575510. 10698.7   3
  -3   3  -3 584692. 10739.0   1
   3   3   4 21911.6 1284.25   4
  -3   3  -4 23399.3 1084.24   3
  -3   3  -4 25186.4 1203.41   1
  -3  -3  -4 25980.4 1173.92   5
   3   3   5 31045.8 1649.43   4
  -3   3  -5 32021.5 1292.73   3
  -3   3  -5 29110.8 1414.17   1
  -3  -3  -5 31906.8 1396.38   5
  -3   3  -6 125.900 277.351   3
  -3  -3  -6 673.707 441.819   5
   3   3   6 429.911 535.546   4
   3   3   6-223.403 241.481   7
  -3   3  -6 365.620 464.834   1
   3   3   7 65751.3 2702.13   4
  -3   3  -7 59850.7 1900.54   3
  -3   3  -7 61319.1 2380.18   1
   3   3   7 59249.4 1953.58   7
  -3  -3  -7 58944.0 2226.62   5
   3   3   8 496.027 586.329   4
   3   3   8 449.682 345.013   7
  -3  -3  -8-198.956 444.200   5
  -3   3  -8 297.846 277.441   3
  -3   3  -8 705.735 566.490   1
  -3  -3  -8 503.305 426.253   1
  -3  -3  -9 97185.8 3112.53   1
  -3   3  -9 97352.1 2565.00   3
   3   3   9 92384.4 2773.88   7
   3   3   9 103756. 3808.52   4
  -3   3  -9 97468.7 3480.25   1
   3   3   9 96362.4 2506.91   2
  -3  -3 -10 1832.83 542.913   1
   3   3  10 2574.98 853.705   4
   3   3  10 1872.93 432.850   7
  -3   3 -10 3277.11 818.503   1
   3   3  11 4270.06 921.848   4
   3   3  11 2666.39 472.276   7
  -3   3 -11 4564.86 853.302   1
  -3  -3 -11 3231.28 656.454   1
  -3   3 -12 3934.78 937.734   1
  -3  -3 -12 2490.35 684.551   1
   3   3  12 2567.33 840.818   4
   3   3  12 3218.86 652.538   6
  -3   3 -13 16717.2 1634.78   1
   3   3  13 19490.1 1883.89   4
   3  -3  13 19102.5 1772.83   6
   3   3  13 17527.3 1368.55   6
  -3  -3 -13 18240.9 1565.75   1
  -3   3 -14 3521.09 917.938   1
  -3  -3 -14 4013.85 817.045   1
   3  -3  14 2918.71 837.239   6
  -3  -3 -15 3820.66 949.593   1
  -3   3 -15 3108.37 929.914   1
   3  -3  15 2970.36 964.029   6
   3   3  15 5095.68 1224.02   4
  -3  -3 -16 1201.13 721.622   1
   3  -3  16 2085.32 1041.74   6
  -3   3 -16 1869.04 820.565   1
   3   3  16 1522.03 986.862   4
  -3  -3 -17 14877.0 1631.89   1
   3  -3  17 16892.8 1880.61   6
  -3   4  17 60.2584 452.528   7
  -3   4  16 1152.88 599.505   7
  -3  -4  16 1767.39 803.822   6
  -3   4  16 768.735 524.497   4
  -3   4  15 10445.8 1189.46   4
  -3  -4  15 8679.55 1253.79   6
  -3   4  15 9685.99 1230.10   7
  -3   4  14 7766.69 1087.35   7
  -3   4  14 7726.59 1015.18   4
  -3  -4  14 10550.1 1335.01   6
  -3   4  13 2007.66 613.860   7
  -3   4  13 3119.08 630.321   4
  -3   4  12 7033.03 871.256   4
  -3   4  12 5784.12 885.299   7
  -3  -4  12 7721.34 1099.67   6
  -3  -4  11 10298.9 1186.83   6
  -3   4  11 9131.11 1029.30   7
  -3   4  11 10653.5 1000.92   4
  -3   4  10 1605.50 360.111   6
  -3  -4  10 1294.25 670.090   6
  -3   4  10 1757.69 451.680   4
  -3   4  10 2060.64 618.760   7
  -3   4   9 14500.9 1210.12   7
  -3   4   9 17452.5 958.430   3
  -3  -4   9 19371.8 1455.68   6
  -3   4   9 16837.3 936.842   6
  -3   4   9 16755.5 1155.08   4
   3   4  -9 17284.3 1011.33   2
  -3   4   8 77808.3 2549.82   4
  -3   4   8 78642.0 2861.92   7
  -3   4   8 77670.9 2203.53   6
  -3   4   8 78596.9 2329.39   3
   3   4  -8 81283.7 2448.57   2
  -3  -4   8 81810.3 2936.06   6
  -3  -4   7 46698.2 2034.29   6
  -3   4   7 43247.6 1628.05   3
  -3   4   7 44178.5 1728.35   4
  -3   4   7 43249.5 1440.68   6
  -3   4   7 43476.2 1981.67   7
  -3   4   6 4903.93 577.328   4
  -3   4   6 6877.44 654.562   3
  -3   4   6 6396.18 505.827   6
  -3  -4   6 5795.40 789.767   6
  -3   4   6 5308.44 749.089   7
  -3  -4   5 109502. 3126.75   6
  -3   4   5 106000. 2826.77   4
  -3   4   5 112127. 3296.97   7
  -3   4   5 116103. 2684.32   6
  -3   4   5 112816. 2946.42   3
  -3   4   4 40540.5 1429.59   4
  -3  -4   4 40771.4 1602.18   6
  -3   4   4 38812.5 1506.53   3
  -3   4   4 43817.1 1358.75   6
  -3   4   4 38871.7 1710.04   7
  -3   4   4 38648.8 955.494   5
  -3   4   4 37709.1 929.473   1
  -3   4   3 5233.83 587.693   3
  -3   4   3 4152.79 441.971   4
  -3  -4   3 4600.88 554.280   6
  -3   4   3 4632.76 621.505   7
  -3   4   2 91843.7 2406.28   4
  -3  -4   2 98450.3 2532.85   6
  -3   4   2 101070. 2688.77   3
  -3   4   2 96766.1 2742.96   7
  -3   4   1 215874. 4752.25   3
  -3   4   1 214771. 4747.76   7
  -3  -4   1 209682. 4413.73   6
  -3   4   0 19165.4 1060.90   3
  -3   4   0 20467.0 1000.93   7
  -3   4   0 19634.4 749.702   1
  -3  -4   0 20433.9 854.077   6
   3  -4   0 19614.1 593.559   5
   3   4   0 22480.8 1137.39   4
  -3   4  -1 106219. 2920.20   3
  -3   4  -1 108014. 2552.60   1
   3   4   1 115000. 3057.32   4
  -3  -4  -1 112548. 2952.26   5
  -3  -4  -1 111444. 2606.45   6
   3   4   2 414371. 8398.45   4
  -3   4  -2 412243. 8200.35   3
  -3   4  -2 418354. 7886.94   1
  -3  -4  -2 403547. 8152.82   5
  -3   4  -3 14031.6 846.320   1
   3   4   3 14245.0 1059.96   4
  -3   4  -3 14212.6 934.656   3
  -3  -4  -3 12770.8 846.045   5
   3   4   4 61631.3 2400.47   4
  -3   4  -4 66833.4 2160.20   1
  -3  -4  -4 67173.7 2105.35   5
  -3   4  -4 65621.0 2144.18   3
   3   4   5 95210.4 3255.36   4
  -3   4  -5 101962. 2862.53   3
  -3   4  -5 99047.8 2967.64   1
  -3  -4  -5 103791. 2879.74   5
   3   4   6 24936.7 1657.93   4
  -3   4  -6 25898.4 1276.83   3
  -3  -4  -6 27835.5 1378.04   5
  -3   4  -6 27232.6 1479.39   1
   3   4   7 32701.3 1926.48   4
  -3   4  -7 33815.6 1472.98   3
   3   4   7 32125.0 1442.02   2
   3   4   7 30778.3 1457.56   7
  -3  -4  -7 32060.3 1586.78   5
  -3   4  -7 32678.3 1746.25   1
  -3  -4  -8 152141. 3947.26   1
   3   4   8 146007. 4636.63   4
  -3   4  -8 142292. 3677.46   3
   3   4   8 143625. 3625.22   2
  -3  -4  -8 146648. 4118.32   5
   3   4   8 144951. 3843.79   7
  -3   4  -8 150624. 4392.51   1
  -3   4  -9 21302.3 1599.95   1
   3   4   9 22826.2 1724.61   4
   3   4   9 19810.6 1226.37   7
  -3  -4  -9 21142.8 1305.65   1
  -3   4  -9 20584.7 1119.48   3
   3   4   9 20094.1 1077.08   2
  -3  -4 -10 1813.41 579.517   1
   3   4  10 2709.79 525.781   7
   3   4  10 1870.64 695.529   4
  -3   4 -10 1929.85 675.188   1
  -3   4 -11 12065.5 1357.29   1
   3   4  11 9727.28 912.231   7
  -3  -4 -11 9922.16 1036.41   1
   3   4  11 9435.01 1245.17   4
  -3  -4 -12 10200.6 1066.80   1
  -3   4 -12 10568.0 1324.15   1
   3   4  12 11088.6 1393.80   4
  -3  -4 -13 19.7770 506.794   1
   3   4  13-756.574 692.582   4
  -3   4 -13 1300.87 737.539   1
   3  -4  13 609.223 705.654   6
  -3   4 -14 7064.18 1250.24   1
   3  -4  14 7707.75 1280.90   6
  -3  -4 -14 7672.66 1113.96   1
   3   4  14 10596.6 1504.68   4
  -3  -4 -15 17228.5 1571.28   1
   3   4  15 13945.3 1736.96   4
   3  -4  15 16294.6 1799.41   6
  -3   4 -15 13158.3 1697.22   1
   3   4  16 1339.05 819.826   4
  -3   4 -16 664.829 782.048   1
   3  -4  16 1556.52 771.127   6
  -3   5  16 11276.8 1369.14   7
  -3  -5  16 11832.8 1537.86   6
  -3   5  15 519.889 463.313   7
  -3  -5  15 202.839 701.442   6
  -3   5  15 527.907 470.565   4
  -3   5  14 7720.69 1100.55   7
  -3  -5  14 7586.29 1210.25   6
  -3   5  14 7983.95 1020.89   4
  -3   5  13 6129.20 867.997   4
  -3   5  13 5371.60 926.864   7
  -3  -5  13 5873.56 1076.76   6
  -3   5  12 10166.1 1144.54   7
  -3   5  12 11403.2 1116.99   4
  -3  -5  12 10495.6 1331.24   6
  -3   5  11 3040.96 646.971   4
  -3   5  11 2668.46 641.904   7
  -3  -5  11 3143.43 809.366   6
  -3   5  10 75186.3 2793.67   4
  -3  -5  10 77627.3 3155.40   6
  -3   5  10 75495.8 3043.41   7
  -3   5   9 9594.77 1044.04   7
  -3   5   9 8254.76 825.824   4
   3   5  -9 7805.23 751.453   2
  -3  -5   9 7100.58 1017.15   6
  -3   5   9 8085.85 757.913   3
  -3   5   8 5974.77 680.848   3
  -3   5   8 4919.85 769.275   7
   3   5  -8 5526.37 706.749   2
  -3  -5   8 5783.92 914.774   6
  -3   5   8 5411.80 688.351   4
  -3   5   7 10856.6 865.122   4
  -3   5   7 10779.9 846.497   3
   3   5  -7 11995.3 947.061   2
  -3   5   7 11012.6 684.354   6
  -3   5   7 11165.5 1082.19   7
  -3  -5   7 12775.1 1180.28   6
  -3   5   6 96305.0 2885.38   4
  -3  -5   6 98205.5 3123.20   6
  -3   5   6 103486. 2525.76   6
  -3   5   6 99849.2 2930.18   3
   3   5  -6 99272.2 3013.41   2
  -3   5   6 101231. 3310.12   7
  -3   5   5 28195.3 1330.00   4
  -3   5   5 30057.2 1596.39   7
  -3  -5   5 29938.5 1494.92   6
  -3   5   5 29593.7 1417.22   3
  -3   5   4 56723.2 2253.99   7
  -3  -5   4 58182.2 2055.75   6
  -3   5   4 60155.7 2106.82   3
  -3   5   4 56890.2 1944.30   4
  -3   5   3 34034.3 1525.51   3
  -3   5   3 35753.7 1673.62   7
  -3  -5   3 35379.5 1445.93   6
  -3   5   3 32899.7 1385.07   4
  -3   5   2 7957.82 765.027   3
  -3   5   2 8290.97 788.553   7
  -3  -5   2 8300.62 673.047   6
  -3   5   1 3370.96 558.131   3
  -3   5   1 5176.02 630.596   7
  -3  -5   1 5069.96 510.347   6
  -3   5   1 4084.28 275.188   1
  -3   5   0 240623. 5307.01   7
   3  -5   0 231145. 4229.75   5
  -3  -5   0 234752. 4773.31   6
  -3   5   0 242336. 5403.71   3
  -3   5   0 234384. 4527.23   1
   3   5   0 249960. 5569.44   4
  -3   5  -1-184.470 409.750   3
   3   5   1 270.242 365.690   4
  -3  -5  -1 557.503 270.656   6
  -3   5  -1 919.945 279.097   1
  -3  -5  -1 581.792 387.443   5
  -3   5  -2 581.006 406.776   3
  -3   5  -2 1120.66 327.456   1
   3   5   2 610.614 447.455   4
  -3  -5  -2 602.195 341.745   5
  -3   5  -3 2677.86 568.693   3
  -3   5  -3 2911.95 504.991   1
   3   5   3 4105.78 714.817   4
  -3  -5  -3 3651.27 514.979   5
   3   5   4 93227.5 3230.03   4
  -3   5  -4 98761.0 2973.99   3
  -3  -5  -4 98673.5 2764.24   5
  -3   5  -4 98643.4 2840.48   1
  -3  -5  -5 230.774 334.546   5
  -3   5  -5 1478.79 480.851   3
   3   5   5 2283.82 633.646   2
  -3   5  -5 1116.74 496.667   1
   3   5   5 1068.25 605.978   4
  -3   5  -6 143126. 3882.13   3
   3   5   6 138762. 4403.00   4
   3   5   6 147217. 3892.47   2
  -3  -5  -6 147691. 3841.82   5
  -3   5  -6 147517. 4105.91   1
  -3  -5  -7 4246.04 654.231   5
  -3   5  -7 3605.03 617.078   3
   3   5   7 3743.38 797.554   4
  -3   5  -7 3544.08 787.233   1
   3   5   7 4185.06 658.792   2
  -3  -5  -8 7392.25 748.170   1
  -3  -5  -8 5714.83 756.056   5
   3   5   8 7736.41 1083.41   4
  -3   5  -8 7121.22 782.125   3
   3   5   8 7922.49 796.960   2
   3   5   8 6899.77 813.786   7
  -3   5  -8 7698.50 989.487   1
  -3  -5  -9 7474.43 797.147   1
   3   5   9 6094.45 767.513   7
  -3  -5  -9 7614.01 909.191   5
  -3   5  -9 7230.15 748.982   3
  -3   5  -9 8016.69 1034.26   1
   3   5   9 6660.20 1030.76   4
   3   5   9 7257.83 734.327   2
  -3   5 -10 112814. 4033.17   1
   3   5  10 102843. 4144.92   4
   3   5  10 104930. 3443.97   7
  -3  -5 -10 109204. 3385.93   1
   3   5  11 3044.88 595.565   7
  -3   5 -11 2664.29 834.247   1
   3   5  11 4391.06 947.562   4
  -3  -5 -11 3796.54 685.531   1
   3   5  12 14911.3 1583.49   4
  -3   5 -12 16401.9 1588.68   1
   3  -5  12 19292.5 1808.48   6
  -3  -5 -12 13547.4 1220.00   1
   3  -5  13 549.882 867.078   6
  -3   5 -13 705.168 693.831   1
   3   5  13 415.715 728.586   4
  -3  -5 -13 864.858 554.992   1
   3   5  14 5612.97 1172.67   4
   3  -5  14 7190.31 1271.00   6
  -3   5 -14 5921.71 1211.38   1
  -3   5 -15 3266.47 1070.79   1
   3  -5  15 5089.81 1206.57   6
   3   5  15 4356.95 1123.67   4
   3   5  16 16575.5 2000.85   4
  -3   6  16 1482.30 605.078   7
  -3   6  15 426.201 533.039   7
  -3   6  15-254.143 484.946   4
  -3  -6  15 97.3865 741.970   6
  -3   6  14 14737.6 1396.78   4
  -3  -6  14 18887.6 1816.67   6
  -3   6  14 16080.2 1564.90   7
  -3   6  13 252.785 520.538   7
  -3   6  13 1352.65 480.126   4
  -3   6  12 48228.2 2406.11   4
  -3   6  12 49205.0 2628.73   7
  -3  -6  12 54116.4 2832.34   6
  -3   6  11 3120.09 737.039   7
  -3   6  11 5434.03 804.728   4
  -3  -6  11 3968.89 922.002   6
  -3   6  10 2636.65 723.555   7
  -3   6  10 2822.85 613.479   4
  -3  -6  10 4372.98 942.615   6
   3   6  -9 421.168 434.911   2
  -3   6   9 131.682 372.499   3
  -3   6   9 504.744 378.750   4
  -3  -6   9-439.012 563.122   6
  -3   6   9 449.012 517.758   7
  -3   6   8 19891.8 1301.28   4
  -3   6   8 18344.1 1472.10   7
  -3  -6   8 18552.2 1443.62   6
   3   6  -8 19325.6 1267.66   2
  -3   6   8 22245.0 1312.96   3
   3   6  -7 8628.18 951.677   2
  -3   6   7 10684.7 937.499   4
  -3  -6   7 10291.0 1058.28   6
  -3   6   7 9163.95 873.990   3
  -3   6   7 10013.5 1117.25   7
  -3  -6   6 68146.8 2561.13   6
  -3   6   6 68537.5 2464.48   4
  -3   6   6 72892.3 2857.06   7
  -3   6   6 72225.2 2540.64   3
   3   6  -6 76035.0 2684.58   2
  -3  -6   5 18131.5 1189.14   6
  -3   6   5 18553.1 1169.94   4
  -3   6   5 18945.8 1231.90   3
   3   6  -5 19702.3 1381.01   2
  -3   6   5 20553.3 1468.02   7
  -3   6   4-196.595 413.500   3
  -3   6   4 200.531 370.760   4
   3   6  -4 200.454 559.981   2
  -3  -6   4 633.118 446.023   6
  -3   6   4-260.911 440.569   7
  -3   6   3 5345.93 748.607   3
   3   6  -3 4813.86 842.645   2
  -3  -6   3 5630.99 658.219   6
  -3   6   3 6096.53 782.666   7
  -3   6   3 5103.62 613.812   4
  -3   6   2 48475.7 1993.72   3
  -3  -6   2 46797.7 1696.06   6
   3   6  -2 45705.5 2068.00   2
  -3   6   2 47635.5 2035.25   7
  -3   6   1 28239.7 1506.31   7
  -3  -6   1 27199.3 1169.90   6
   3   6  -1 27106.3 1576.41   2
  -3   6   1 25143.4 1459.31   3
  -3   6   0 328.733 196.411   1
  -3   6   0-393.241 530.905   3
   3   6   0 921.491 685.353   2
   3   6   0 354.080 425.581   4
  -3  -6   0 354.322 254.957   6
   3  -6   0 28.7476 67.2122   5
  -3   6  -1 51754.8 1549.41   1
  -3  -6  -1 52448.1 1571.79   6
  -3  -6  -1 50894.4 1945.31   5
  -3   6  -1 53914.4 2172.30   3
   3   6   1 54958.9 2229.94   2
   3   6   1 57410.8 2302.64   4
   3   6   2 67665.5 2598.86   4
  -3   6  -2 63817.1 1924.90   1
  -3   6  -2 67148.9 2465.62   3
  -3  -6  -2 63277.5 2190.47   5
   3   6   2 65339.0 2482.26   2
  -3   6  -3 517.709 368.072   1
  -3   6  -3 777.284 463.784   3
   3   6   3 391.370 554.544   4
   3   6   3 611.923 653.141   2
  -3  -6  -3 265.621 390.002   5
  -3   6  -4 17325.2 1080.77   1
   3   6   4 20264.5 1467.41   4
  -3  -6  -4 17213.3 1043.62   5
  -3   6  -4 17596.6 1250.00   3
   3   6   4 18067.8 1315.52   2
  -3   6  -5 11797.5 972.947   1
   3   6   5 10865.5 1134.68   4
  -3   6  -5 11420.6 1075.92   3
   3   6   5 12192.3 1083.13   2
  -3  -6  -5 13067.5 947.569   5
  -3   6  -6 84296.7 2870.56   1
   3   6   6 74599.1 3160.31   4
   3   6   6 82700.8 2844.54   2
  -3   6  -6 81884.4 2834.41   3
  -3  -6  -6 79040.6 2603.60   5
  -3   6  -7 8508.99 895.989   3
   3   6   7 9059.63 1155.86   4
  -3   6  -7 9744.57 1033.87   1
   3   6   7 10634.1 1000.87   2
  -3  -6  -7 8504.18 865.949   5
  -3   6  -8 56713.0 2529.08   1
  -3  -6  -8 53401.0 2021.57   1
  -3   6  -8 52819.7 2229.72   3
   3   6   8 54068.2 2161.09   2
  -3  -6  -8 54803.4 2260.85   5
  -3  -6  -9 2087.92 609.644   5
  -3  -6  -9 1003.32 471.111   1
   3   6   9 1169.14 495.831   2
   3   6   9 1623.98 807.959   4
  -3   6  -9 1323.73 611.779   1
  -3   6  -9 2160.43 531.923   3
  -3  -6 -10 1007.62 432.629   1
  -3   6 -10 111.871 638.298   1
   3   6  10-707.617 587.332   4
  -3   6 -11 6668.47 1161.11   1
   3   6  11 5832.83 1078.47   4
   3   6  11 5172.22 836.296   7
   3   6  12 33336.7 2454.32   4
  -3   6 -12 31189.4 2283.75   1
   3  -6  12 36861.4 2464.35   6
   3   6  13 554.684 496.489   4
  -3   6 -13 1180.39 632.377   1
   3  -6  13 1409.62 976.133   6
  -3   6 -14 9456.26 1454.46   1
   3  -6  14 9674.28 1458.00   6
   3   6  14 10455.6 1482.72   4
   3   6  15 829.885 667.916   4
   3  -6  15 1560.62 840.479   6
  -3   7  15 708.351 545.412   7
  -3   7  14 5160.78 1016.88   7
  -3   7  14 4066.19 757.045   4
  -3  -7  14 6174.27 1209.95   6
  -3   7  13 15036.1 1418.05   4
  -3   7  13 17371.7 1693.73   7
  -3  -7  13 20203.6 1860.79   6
  -3   7  12 651.407 684.378   7
  -3   7  12 276.458 416.621   4
  -3  -7  12 213.131 649.003   6
  -3   7  11 7316.66 955.635   4
  -3   7  11 8946.26 1162.83   7
  -3  -7  11 7712.71 1129.68   6
  -3   7  10 9849.85 1045.78   4
  -3   7  10 9988.36 1229.17   7
  -3  -7  10 10513.7 1262.16   6
  -3   7   9 7727.75 861.846   3
   3   7  -9 9123.75 974.753   2
  -3   7   9 7815.95 1061.14   7
  -3   7   9 7621.24 922.290   4
  -3  -7   9 8604.39 1078.48   6
  -3   7   8 13788.0 1163.39   4
  -3  -7   8 15253.0 1338.98   6
   3   7  -8 16051.8 1296.29   2
  -3   7   8 16131.6 1221.60   3
  -3   7   8 18369.9 1507.72   7
   3   7  -7 21084.4 1473.87   2
  -3   7   7 22490.4 1422.54   4
  -3   7   7 22169.8 1655.80   7
  -3  -7   7 20371.1 1465.37   6
  -3   7   7 22450.7 1429.51   3
  -3   7   6 8214.92 868.001   4
   3   7  -6 9774.38 1044.99   2
  -3   7   6 9138.73 1058.43   7
  -3  -7   6 8987.22 950.080   6
  -3   7   6 9619.22 985.752   3
  -3   7   5-218.709 443.037   3
   3   7  -5 545.586 614.627   2
  -3  -7   5 244.291 419.458   6
  -3   7   5 921.986 541.458   7
  -3   7   5 271.199 383.857   4
  -3   7   4 16187.4 1137.56   4
  -3   7   4 17116.5 1255.33   3
  -3  -7   4 15846.1 1103.55   6
   3   7  -4 16159.4 1339.03   2
  -3   7   4 16785.7 1366.00   7
  -3   7   3 69517.3 2788.28   7
  -3   7   3 70147.3 2668.25   3
   3   7  -3 73979.8 2846.51   2
  -3  -7   3 69307.8 2320.90   6
  -3   7   2 833.962 539.439   3
  -3   7   2-41.0064 499.129   7
   3   7  -2 105.289 638.095   2
  -3  -7   2 244.960 347.750   6
  -3   7   1 16326.5 1279.85   3
  -3  -7   1 16113.6 926.387   6
   3   7  -1 18277.5 1426.17   2
  -3   7   0 3529.90 744.608   3
   3   7   0 2249.13 784.052   2
  -3  -7   0 2874.68 389.403   6
   3   7   1 12256.4 1151.12   4
   3   7   1 12233.0 1201.41   2
  -3  -7  -1 11704.0 683.396   6
  -3   7  -1 10653.7 1059.45   3
  -3  -7  -1 11754.2 926.861   5
  -3   7  -2 10606.9 1064.46   3
   3   7   2 10171.2 1113.12   4
   3   7   2 11562.5 1211.35   2
  -3   7  -2 11005.9 734.967   1
  -3  -7  -2 10758.1 859.885   5
   3   7   3 41382.1 2085.88   2
  -3   7  -3 38175.0 1569.44   1
   3   7   3 44035.3 2241.07   4
  -3   7  -3 39033.2 1994.67   3
  -3  -7  -3 39998.0 1660.24   5
  -3   7  -4 11729.7 951.895   1
  -3   7  -4 11779.1 1156.09   3
   3   7   4 13224.9 1204.74   2
   3   7   4 11636.1 1210.26   4
  -3  -7  -4 12742.3 912.319   5
  -3  -7  -5 4512.84 585.093   5
  -3   7  -5 2273.40 537.702   1
  -3   7  -5 2483.80 684.247   3
   3   7   5 1898.94 713.078   4
   3   7   5 3708.18 795.964   2
  -3   7  -6 14202.0 1140.86   1
   3   7   6 13154.6 1333.06   4
   3   7   6 14482.5 1236.21   2
  -3   7  -6 14318.7 1225.68   3
  -3  -7  -6 12832.5 961.903   5
   3   7   7 17877.8 1566.54   4
  -3   7  -7 19737.7 1433.04   1
   3   7   7 18897.3 1368.17   2
  -3   7  -7 19702.2 1468.56   3
  -3  -7  -7 19954.4 1277.68   5
   3   7   8 10124.0 1279.36   4
  -3   7  -8 10417.1 1129.20   1
   3   7   8 11332.1 1079.40   2
  -3   7  -8 12778.6 1151.89   3
  -3  -7  -8 10658.8 1032.72   5
  -3  -7  -9 4861.89 735.932   5
   3   7   9 5751.21 798.704   2
   3   7   9 3397.12 866.044   4
  -3   7  -9 3580.47 633.201   3
  -3   7  -9 5450.34 959.467   1
  -3   7 -10 13057.0 1462.58   1
   3   7  10 12394.8 1454.29   4
   3  -7  10 13184.6 1426.07   6
   3   7  11 4849.54 1019.35   4
   3  -7  11 4163.20 970.245   6
  -3   7 -11 4205.28 989.460   1
   3   7  12 3797.26 878.961   4
   3  -7  12 6829.90 1154.48   6
  -3   7 -12 5427.85 1124.33   1
   3  -7  13 15852.2 1797.93   6
   3   7  13 11753.2 1595.32   4
   3   7  14 6007.27 1212.31   4
   3  -7  14 10290.8 1567.67   6
  -3   8  14 246.391 525.294   7
  -3   8  14 232.075 409.416   4
  -3   8  13 1370.03 604.477   4
  -3  -8  13 729.267 606.901   6
  -3   8  13 43.6513 540.053   7
  -3   8  12 467.223 530.286   7
  -3   8  12 514.204 427.453   4
  -3  -8  12 237.332 706.156   6
  -3   8  11 17688.4 1675.96   7
  -3   8  11 16220.7 1449.91   4
  -3  -8  11 16610.2 1603.99   6
  -3   8  10 872.591 458.942   4
  -3   8  10 1129.19 607.329   7
  -3  -8  10 45.9682 545.538   6
  -3   8   9 14811.5 1307.28   4
  -3   8   9 14679.7 1504.43   7
  -3  -8   9 15119.7 1415.23   6
   3   8  -9 17667.9 1408.08   2
  -3   8   9 12866.9 1184.52   3
   3   8  -8 7919.00 1030.50   2
  -3   8   8 7655.99 927.703   3
  -3   8   8 7129.88 932.398   4
  -3  -8   8 6534.79 931.903   6
  -3   8   8 7810.22 1087.13   7
  -3   8   7 10839.5 1085.89   4
   3   8  -7 12020.7 1207.19   2
  -3   8   7 12425.1 1378.14   7
  -3  -8   7 13667.1 1218.87   6
  -3   8   7 11893.1 1150.33   3
  -3   8   6 3459.64 643.170   4
   3   8  -6 3097.31 733.932   2
  -3  -8   6 3482.17 689.922   6
  -3   8   6 3606.57 766.970   3
  -3   8   6 3318.86 820.772   7
  -3  -8   5 79080.3 2838.64   6
  -3   8   5 87967.7 3476.76   7
  -3   8   5 89726.7 3238.31   3
  -3   8   5 84591.1 3079.99   4
   3   8  -5 87740.7 3319.30   2
  -3   8   4 1033.73 571.787   3
   3   8  -4 1572.84 747.561   2
  -3  -8   4 219.523 363.036   6
  -3   8   4 1070.68 599.186   7
  -3   8   3 4909.61 784.957   3
   3   8  -3 5842.25 951.509   2
  -3   8   3 5496.67 908.337   7
  -3  -8   3 5895.53 694.167   6
  -3  -8   2 479.518 312.690   6
   3   8  -2 836.467 666.430   2
  -3   8   2 681.951 577.839   3
   3   8  -1 58542.0 2618.42   2
  -3  -8   1 55257.1 1846.77   6
  -3   8   1 57893.8 2524.69   3
  -3   8   0 1670.10 697.371   3
  -3  -8   0 1113.87 302.470   6
   3   8   0 1250.22 768.078   2
  -3  -8  -1 67072.5 1909.50   6
  -3  -8  -1 72396.5 2501.10   5
  -3   8  -1 75404.0 2957.84   3
   3   8   1 72441.4 2949.54   2
  -3   8  -2 13903.1 1318.53   3
   3   8   2 12821.6 1282.54   2
  -3  -8  -2 13106.3 994.291   5
   3   8   2 14300.5 1348.19   4
   3   8   3-565.955 553.518   2
   3   8   3 311.668 482.914   4
  -3   8  -3 794.775 599.228   3
  -3  -8  -3-244.128 292.476   5
  -3  -8  -4 898.533 372.741   5
   3   8   4 430.011 639.661   4
   3   8   4 1736.10 628.874   2
  -3   8  -4 1926.41 679.439   3
  -3   8  -5 39567.8 2206.33   3
   3   8   5 44209.5 2485.94   4
   3   8   5 40469.9 2147.76   2
  -3  -8  -5 38666.7 1700.24   5
  -3  -8  -6 1291.35 409.008   5
   3   8   6 1512.32 644.713   2
   3   8   6 1544.62 710.875   4
  -3   8  -6 2501.01 733.115   3
  -3  -8  -7 1796.25 428.304   5
   3   8   7 2657.36 721.470   2
   3   8   7 1825.24 791.341   4
  -3   8  -7 1435.92 665.733   3
  -3  -8  -8 5994.02 760.377   5
   3   8   8 6682.72 914.848   2
   3   8   8 7499.30 1162.71   4
  -3   8  -8 6206.84 928.418   3
   3   8   9 8572.67 991.095   2
  -3   8  -9 6141.31 887.239   3
   3   8   9 7588.01 1215.84   4
   3  -8   9 8090.06 1130.13   6
  -3  -8  -9 9463.01 1004.60   5
   3   8  10 2044.85 674.878   4
   3  -8  10 2149.86 743.025   6
   3   8  11 4166.49 1082.29   4
   3  -8  11 5015.47 1095.51   6
   3   8  12-459.051 536.255   4
   3  -8  12 783.936 772.078   6
   3   8  13 4954.66 1179.20   4
   3  -8  13 4002.21 1163.99   6
  -3   9  13 2718.54 786.857   4
  -3   9  13 2851.72 864.118   7
  -3  -9  13 2725.67 925.452   6
  -3   9  12 1740.84 646.518   4
  -3  -9  12 551.694 691.692   6
  -3   9  12 1723.48 726.477   7
  -3  -9  11 1097.17 766.616   6
  -3   9  11 263.353 574.347   7
  -3   9  11 512.468 513.112   4
  -3   9  10 8957.24 1109.68   4
  -3   9  10 8270.00 1292.80   7
  -3  -9  10 10461.9 1298.62   6
   3   9  -9 18625.3 1559.04   2
  -3   9   9 16900.9 1682.17   7
  -3   9   9 16140.0 1387.04   3
  -3  -9   9 19116.1 1642.54   6
  -3   9   9 16926.3 1475.37   4
   3   9  -8 5657.83 1007.42   2
  -3   9   8 4414.09 813.703   3
  -3   9   8 5299.91 1021.25   7
  -3  -9   8 5911.80 950.434   6
  -3   9   8 4547.38 825.689   4
   3   9  -7 19358.9 1601.82   2
  -3   9   7 15655.7 1384.03   4
  -3   9   7 17336.5 1459.76   3
  -3   9   7 18357.5 1703.39   7
  -3  -9   7 14451.0 1272.75   6
  -3   9   6 1636.99 721.813   7
   3   9  -6 1979.20 751.072   2
  -3   9   6-277.333 546.091   3
  -3   9   6 1258.36 496.095   4
  -3  -9   6 2581.60 683.695   6
   3   9  -5 10269.1 1214.96   2
  -3   9   5 12710.2 1412.27   7
  -3  -9   5 12032.6 1076.93   6
  -3   9   5 10957.6 1162.19   3
   3   9  -4 7305.92 1071.75   2
  -3  -9   4 8174.71 856.021   6
  -3   9   4 9952.30 1149.56   3
  -3  -9   3 73076.9 2490.99   6
  -3   9   3 71190.4 3004.62   3
   3   9  -3 72239.5 3142.61   2
   3   9  -2 693.902 576.116   2
  -3  -9   2 1077.87 358.911   6
   3   9  -1 14433.4 1423.03   2
  -3   9   1 15042.8 1427.96   3
  -3   9   0 1309.55 685.047   3
   3   9   0 744.116 767.384   2
   3   9   1 47239.0 2456.87   2
  -3   9  -1 41130.1 2309.82   3
  -3  -9  -1 43781.6 1942.21   5
   3   9   2 674.443 609.962   2
   3   9   2 1481.85 675.240   4
  -3   9  -2 1021.46 672.338   3
  -3  -9  -2 1774.05 464.786   5
   3   9   3 74669.1 3181.53   2
  -3   9  -3 71188.9 3135.39   3
  -3  -9  -3 72894.1 2473.77   5
   3   9   3 74241.8 3361.33   4
   3   9   4 15617.7 1549.53   4
   3   9   4 14156.9 1403.93   2
  -3   9  -4 14832.0 1446.05   3
  -3  -9  -4 12221.0 934.635   5
  -3  -9  -5 1165.43 353.750   5
  -3   9  -5 1416.57 672.806   3
   3   9   5 1411.80 679.747   2
   3   9   5 2035.36 793.047   4
   3   9   6 2078.99 790.472   4
   3   9   6 2062.11 710.577   2
   3  -9   6 1748.06 660.317   6
  -3   9  -6 793.650 601.194   3
   3   9   7 8480.74 1090.60   2
   3  -9   7 7793.73 1080.69   6
   3   9   7 7112.14 1171.08   4
  -3   9  -7 7848.13 1072.22   3
  -3   9  -8 2073.84 608.394   3
   3   9   8 2596.87 708.431   2
   3   9   8 1214.05 607.973   4
   3  -9   8 2801.80 766.697   6
   3   9   9 13350.1 1307.85   2
   3   9   9 14833.5 1704.18   4
   3  -9   9 16454.2 1620.54   6
  -3   9  -9 12501.5 1356.80   3
   3   9  10 4877.90 1021.29   4
   3  -9  10 5063.20 1102.96   6
   3   9  11 2153.87 761.286   4
   3  -9  11 2116.45 916.569   6
   3   9  12 1271.85 664.086   4
   3  -9  12 2009.86 887.866   6
   3  -9  13 7023.02 1309.86   6
  -3 -10  12 6867.00 1267.63   6
  -3  10  12 3925.59 825.508   4
  -3  10  11 1979.27 753.370   4
  -3  10  11 975.777 633.011   7
  -3 -10  11-15.4368 681.932   6
  -3  10  10 1998.80 648.890   4
  -3  10  10 3825.44 1003.47   7
  -3 -10  10 2928.70 910.686   6
   3  10  -9 2520.62 855.814   2
  -3 -10   9 766.230 648.741   6
  -3  10   9 1030.13 524.848   4
  -3  10   9 1407.47 817.014   7
  -3  10   9 1151.85 598.113   3
  -3  10   8 19358.5 1873.74   7
  -3 -10   8 19008.6 1545.93   6
   3  10  -8 19465.1 1682.51   2
  -3  10   8 19658.5 1664.52   3
  -3  10   8 17917.0 1602.34   4
   3  10  -7 6433.42 1119.02   2
  -3  10   7 7596.87 1214.45   7
  -3  10   7 5249.09 946.312   3
  -3  10   7 6427.60 972.416   4
  -3 -10   7 7181.99 960.288   6
   3  10  -6 8540.77 1260.12   2
  -3 -10   6 8714.70 1019.56   6
  -3  10   6 7365.92 1086.47   3
  -3  10   5 10851.3 1266.55   3
   3  10  -5 11729.8 1370.47   2
  -3 -10   5 12022.2 1087.74   6
  -3 -10   4 10302.0 961.896   6
   3  10  -4 8635.68 1215.53   2
  -3  10   4 6856.70 1028.67   3
  -3  10   3-1251.46 723.790   3
   3  10  -3-309.259 628.399   2
   3  10  -2 22364.7 1844.27   2
  -3  10   2 25373.9 1861.99   3
  -3  10   1 15333.6 1521.17   3
   3  10  -1 15167.5 1550.58   2
  -3 -10   0 761.404 475.831   5
  -3  10   0-279.012 695.248   3
   3  10   0 513.845 688.887   2
   3  10   1 12180.9 1405.35   2
  -3  10  -1 10053.0 1242.21   3
  -3 -10  -1 11433.1 1006.31   5
  -3  10  -2 17970.2 1654.25   3
   3  10   2 22618.5 1815.34   2
   3  10   3 906.616 774.298   2
  -3  10  -3 1124.28 693.077   3
   3  10   3 1226.61 658.323   4
   3  10   4 3864.45 934.930   2
  -3  10  -4 5950.72 1085.48   3
   3 -10   4 4062.09 701.734   6
   3  10   4 6278.18 1079.71   4
  -3  10  -5 4291.02 873.388   3
   3  10   5 5925.21 1068.33   2
   3  10   5 6405.69 1152.56   4
   3 -10   5 6709.38 910.032   6
   3  10   6 6817.39 1182.44   4
   3  10   6 6916.39 1086.45   2
  -3  10  -6 8598.71 1230.15   3
   3 -10   6 7325.46 1009.88   6
   3  10   7 1972.51 735.680   2
   3 -10   7 839.407 551.092   6
   3  10   7 1000.99 723.415   4
  -3  10  -7 1954.89 836.689   3
   3  10   8 21009.6 2006.94   4
   3  10   8 25908.7 1897.17   2
   3 -10   8 25773.8 1971.89   6
  -3  10  -8 25514.5 1961.21   3
   3  10   9 1107.44 787.551   4
   3 -10   9 1786.55 853.398   6
  -3  10  -9 1075.18 670.708   3
   3  10  10 3385.55 1043.16   4
   3 -10  10 3307.27 1019.38   6
   3  10  11 446.753 711.863   4
   3 -10  11 955.162 801.306   6
   3 -10  12 12271.5 1656.28   6
  -3 -11  11 512.435 609.834   6
  -3  11  11 504.714 489.085   4
  -3 -11  10 9859.21 1291.22   6
  -3  11  10 9763.83 1298.84   4
  -3  11   9 281.736 505.698   4
  -3 -11   9 938.010 619.552   6
   3  11  -8 1222.63 735.957   2
  -3  11   8 1706.10 753.956   3
  -3 -11   8 890.759 654.856   6
   3  11  -7 161.076 580.066   2
  -3  11   7 616.677 581.813   3
  -3 -11   7-315.802 454.810   6
   3  11  -6 6315.01 1091.72   2
  -3  11   6 5124.42 1012.08   3
   3  11  -5 1738.78 776.124   2
  -3  11   5 872.482 672.415   3
   3  11  -4 7323.95 1196.27   2
  -3  11   4 8087.20 1231.53   3
   3  11  -3 500.118 657.220   2
  -3  11   3 1691.34 794.427   3
   3  11  -2 315.105 711.533   2
  -3  11   2-299.485 709.005   3
   3  11  -1 2006.47 861.530   2
  -3  11   1-214.348 671.779   3
  -3  11   0 18143.3 1731.33   3
   3  11   0 20815.8 1860.87   2
  -3  11  -1 2769.92 945.504   3
   3  11   1 3196.18 869.315   2
   3  11   2-313.147 740.853   2
  -3  11  -2 222.446 736.446   3
  -3  11  -3 2303.39 836.643   3
   3  11   3 3646.11 888.675   2
  -3  11  -4 17484.5 1782.43   3
   3  11   4 20977.0 1938.50   4
   3  11   4 19123.8 1776.21   2
   3  11   5 1110.84 706.020   2
   3  11   5-156.593 599.560   4
  -3  11  -5 329.129 584.810   3
   3  11   6 18623.5 1769.83   2
  -3  11  -6 22407.3 1991.04   3
   3 -11   7 1237.29 661.659   6
   3  11   7 639.138 624.060   2
  -3  11  -7 1277.72 804.847   3
   3  11   7 678.410 588.950   4
   3  11   8 2359.56 744.498   2
  -3  11  -8 2318.50 831.089   3
   3  11   8 610.464 650.339   4
   3 -11   8 2988.11 850.623   6
  -3  11  -9 1732.92 824.420   3
   3  11   9 1657.85 852.353   4
   3 -11   9 3782.32 958.972   6
   3 -11  10 26531.2 2190.71   6
   3 -11  11 1191.26 869.697   6
  -3  12   8 6828.77 1185.54   3
   3  12  -8 6362.37 1188.11   2
   3  12  -7 7307.84 1215.17   2
  -3  12   7 4505.23 1000.37   3
   3  12  -6 6907.29 1234.95   2
  -3  12   6 6868.50 1230.72   3
   3  12  -5 8903.41 1343.52   2
  -3  12   5 7138.98 1228.33   3
   3  12  -4 620.068 706.530   2
  -3  12   4 532.206 778.421   3
   3  12  -3 85.2584 659.986   2
  -3  12   3 163.514 640.887   3
   3  12  -2 4646.78 1076.95   2
  -3  12   2 3377.98 1015.63   3
   3  12  -1 14803.1 1704.30   2
  -3  12   1 15217.0 1736.94   3
   3  12   0 299.179 636.962   2
  -3  12   0 1369.48 913.830   3
   3  12   1 11794.0 1548.89   2
  -3  12  -1 10643.0 1475.41   3
  -3  12  -2 857.725 651.693   3
   3  12   2 1188.63 917.697   2
   3  12   3 2328.54 951.224   2
  -3  12  -3 1330.76 885.299   3
   3  12   4-530.771 636.643   2
  -3  12  -4 180.659 665.494   3
   3  12   5 11306.4 1502.06   2
  -3  12  -5 12854.2 1642.95   3
   3  12   6 4614.02 1059.51   2
   3  12   6 3623.19 1016.41   4
  -3  12  -6 3579.49 1063.02   3
   3  12   7 3049.95 892.003   2
  -3  12  -7 5800.85 1166.78   3
   3  12   7 5525.71 1202.45   4
  -3  12  -8 4292.28 982.405   3
   3  12   8 2741.63 840.500   2
  -3  12  -9 2387.02 954.389   3
   3  13  -5 204.448 646.826   2
  -3  13   5 651.875 688.834   3
   3  13  -4 1065.54 836.729   2
  -3  13   4 308.869 637.694   3
   3  13  -3 12784.7 1682.53   2
  -3  13   3 10055.0 1460.78   3
   3  13  -2 686.439 686.764   2
  -3  13   2 635.027 880.567   3
   3  13  -1 3639.05 1064.77   2
  -3  13   1 3737.55 971.610   3
   3  13   0 834.155 829.296   2
  -3  13   0-199.531 643.498   3
   3  13   1 2440.16 863.624   2
  -3  13  -1 3581.73 1077.41   3
   3  13   2 702.342 677.165   2
  -3  13  -2 181.259 756.513   3
   3  13   3 9101.72 1463.46   2
  -3  13  -3 6923.25 1364.31   3
   3  13   4 241.257 736.692   2
  -3  13  -4 206.733 842.678   3
  -3  13  -5 829.003 857.804   3
  -4   0  17 318.489 593.726   6
  -4   0  16 8415.35 1204.77   6
  -4   0  15 362.596 555.002   6
  -4   0  14 25330.0 1789.67   6
  -4   0  13 634.634 540.730   6
  -4   0  12 8934.97 1015.97   6
  -4   0  11-215.834 492.372   6
  -4   0  10 22675.8 1429.90   6
  -4   0   9-26.6733 440.784   6
  -4   0   9-21.5037 184.546   3
  -4   0   8 1647.17 585.433   6
  -4   0   7 446.866 453.521   6
  -4   0   6 132823. 3419.64   6
  -4   0   5 1.80788 330.319   6
  -4   0   4 173713. 3929.30   6
  -4   0   3 1558.16 323.461   6
  -4   0   2 367810. 7097.29   6
  -4   0   1 749.077 399.067   6
  -4   0   0 644788. 11806.7   6
  -4   0   0 628778. 11662.5   5
  -4   0  -1 367.591 308.759   5
  -4   0  -2 10062.6 680.235   5
  -4   0  -3 116.215 278.117   5
  -4   0  -4 282977. 5970.75   5
  -4   0  -5 50.3957 348.209   5
  -4   0  -6 279426. 6239.65   5
  -4   0  -7 54.1347 435.185   5
  -4   0  -7-15.1947 431.907   1
   4   0   7 103.572 101.107   7
   4   0   8 1117.16 187.187   7
  -4   0  -8 2011.10 658.596   1
  -4   0  -9 384.528 517.720   1
  -4   0  -9 217.600 227.102   3
  -4   0 -10 67604.1 2782.72   1
  -4   0 -11 614.480 610.952   1
  -4   0 -12 63235.8 2922.86   1
  -4   0 -13 19.2531 684.021   1
  -4   0 -14 8967.61 1259.57   1
   4   0  15 521.719 683.728   6
  -4   0 -15-772.886 640.404   1
  -4   0 -16 10753.0 1470.18   1
   4   0  16 10192.8 1390.69   6
  -4   0 -17-270.926 744.572   1
   4   0  17 949.550 834.578   6
  -4   1  17 887.362 678.148   7
  -4  -1  17 695.894 594.460   6
  -4  -1  16 1228.61 629.681   6
  -4   1  16 1141.32 628.408   6
  -4  -1  15 2373.20 798.918   6
  -4   1  15 1504.10 605.269   6
  -4   1  14 14913.0 1365.88   6
  -4  -1  14 15435.6 1468.88   6
  -4  -1  13 1189.39 681.191   6
  -4   1  13 798.096 483.896   6
  -4  -1  12 40482.7 2171.92   6
  -4   1  12 40427.1 2029.84   6
  -4  -1  11 32446.2 1853.28   6
  -4   1  11 34678.9 1786.95   6
  -4  -1  10-187.616 495.510   6
  -4   1  10 176.426 442.465   6
  -4   1   9 384.357 468.500   6
  -4  -1   9 324.170 487.675   6
  -4   1   9 121.897 178.671   3
  -4   1   8 64138.4 2238.65   6
  -4  -1   8 66346.2 2376.77   6
  -4   1   8 65289.1 1783.25   3
  -4  -1   7 22127.6 1277.69   6
  -4   1   7 20776.9 898.552   3
  -4   1   7 19716.5 1130.70   6
  -4   1   6 35543.6 1460.06   6
  -4   1   6 36113.0 1256.54   3
  -4  -1   6 37348.6 1561.37   6
  -4   1   5 172916. 3461.26   4
  -4  -1   5 162307. 3980.53   6
  -4   1   5 164471. 3859.54   6
  -4   1   4 55856.8 1336.98   4
  -4   1   4 59283.3 1784.30   6
  -4  -1   4 56426.3 1855.81   6
  -4   1   3 936.666 97.0422   4
  -4   1   3 1107.26 327.067   6
  -4  -1   3 945.622 316.626   6
  -4  -1   2 146448. 2768.75   4
  -4  -1   2 143742. 3319.41   6
  -4   1   2 142656. 3345.22   6
   4   1  -1 248510. 4652.95   4
  -4  -1   1 253727. 4615.99   4
  -4  -1   1 254703. 5190.45   6
  -4   1   1 266786. 5343.65   6
   4   1   0 806.200 208.433   4
  -4   1   0 861.887 272.155   5
   4   1   1 138639. 3047.88   4
  -4  -1  -1 129039. 3246.63   5
  -4   1  -1 135939. 3066.02   5
   4   1   2 225014. 4789.57   4
  -4   1  -2 218990. 4011.09   7
  -4  -1  -2 222368. 4824.04   5
  -4   1  -2 222480. 4650.30   5
  -4  -1  -3 1095.05 341.878   5
  -4   1  -3 823.414 294.688   5
  -4  -1  -3 961.396 142.407   7
  -4  -1  -4 107877. 2128.99   7
  -4  -1  -4 105777. 2894.15   5
  -4   1  -4 100757. 2816.15   5
  -4  -1  -5 216183. 4963.36   5
  -4   1  -5 215272. 4967.17   5
  -4   1  -6 130930. 3590.48   1
  -4   1  -6 133314. 3160.24   3
  -4  -1  -6 127491. 3552.32   5
  -4   1  -6 127707. 3554.52   5
  -4  -1  -7 5720.27 786.946   5
   4  -1   7 5476.72 281.874   7
   4   1   7 5160.18 370.234   7
  -4   1  -7 6721.16 859.837   1
  -4   1  -7 6860.34 575.247   3
   4  -1   8 154110. 3087.91   7
  -4  -1  -8 166851. 4364.12   1
  -4   1  -8 165885. 3627.34   3
  -4   1  -8 161896. 4382.28   1
  -4  -1  -8 165553. 4436.53   5
   4   1   9 8749.06 575.293   7
  -4  -1  -9 9975.25 1003.20   1
  -4   1  -9 7730.10 584.670   3
  -4   1  -9 7345.68 981.764   1
  -4  -1 -10 4771.13 823.184   1
  -4   1 -10 8873.03 1096.10   1
  -4  -1 -11 42749.5 2207.80   1
  -4   1 -11 39028.0 2177.83   1
  -4  -1 -12 23154.3 1700.00   1
  -4   1 -12 22416.4 1770.30   1
  -4  -1 -13 765.441 689.979   1
  -4   1 -13 514.552 558.427   1
  -4   1 -14 13273.3 1555.63   1
  -4  -1 -14 10728.3 1376.03   1
  -4  -1 -15 20253.6 1864.45   1
  -4   1 -15 17550.3 1789.57   1
   4  -1  15 19309.2 1856.90   6
   4   1  15 15600.4 1604.67   6
  -4  -1 -16 2050.47 907.275   1
  -4   1 -16 542.609 994.436   1
   4   1  16 1435.55 733.473   6
   4  -1  16-560.926 695.011   6
  -4  -1 -17 1551.75 796.303   1
   4  -1  17 1354.35 761.864   6
  -4   1 -17 1211.15 895.080   1
  -4   2  17 7917.79 1186.38   7
  -4  -2  17 7775.52 1200.78   6
  -4  -2  16 5900.57 1202.20   6
  -4   2  16 7102.87 1120.09   7
  -4  -2  15 73.9431 657.709   6
  -4   2  15 1022.21 562.026   7
  -4   2  15 990.512 573.489   6
  -4   2  14 7208.88 952.100   6
  -4  -2  14 5466.26 976.550   6
  -4   2  14 5748.31 860.424   4
  -4   2  14 7099.11 1039.63   7
  -4   2  13 21100.6 1448.57   4
  -4  -2  13 19459.1 1618.19   6
  -4   2  12 2091.05 631.233   6
  -4   2  12 1944.87 504.277   4
  -4  -2  12 2849.15 825.800   6
  -4   2  11 5885.68 736.565   4
  -4   2  11 4438.20 710.570   6
  -4  -2  11 6229.03 936.915   6
  -4   2  10 23593.3 1318.21   4
  -4  -2  10 26381.9 1634.82   6
  -4   2  10 24327.3 1386.65   6
  -4   2   9 97959.3 2900.87   4
  -4  -2   9 100649. 3327.58   6
  -4   2   9 99235.3 3022.74   6
  -4   2   9 106902. 2551.94   3
  -4   2   8 28025.1 1265.87   4
  -4   2   8 26869.4 1087.23   3
  -4  -2   8 24161.1 1464.89   6
  -4   2   8 26600.3 1341.41   6
  -4   2   7 159661. 3770.22   4
  -4   2   7 168003. 3987.59   6
  -4   2   7 164013. 3661.35   3
  -4  -2   7 164924. 4249.61   6
  -4   2   6 47629.0 1491.46   4
  -4  -2   6 45709.5 1840.99   6
  -4   2   6 46690.0 1524.97   3
  -4   2   6 47770.0 1667.84   6
  -4   2   5-78.8571 337.257   6
  -4   2   5 92.3999 161.277   4
  -4  -2   5 33.5363 373.807   6
  -4   2   5 103.459 244.251   3
  -4   2   4 8621.76 452.083   4
  -4  -2   4 8038.46 714.481   6
  -4   2   4 9024.28 642.378   6
  -4   2   4 7843.48 593.371   3
  -4   2   3 373824. 6765.31   4
  -4  -2   3 385879. 7499.41   6
  -4   2   3 387241. 7385.99   6
  -4   2   3 380122. 7349.72   3
   4  -2  -2 21520.4 700.443   4
  -4  -2   2 20129.5 990.025   6
  -4   2   2 20876.5 978.894   3
  -4   2   2 20640.5 1007.82   6
   4  -2  -1 71970.5 1662.44   4
   4   2  -1 73407.9 1873.46   4
  -4   2   1 74600.1 2063.29   7
  -4  -2   1 75124.0 2056.74   6
  -4   2   1 75384.7 2104.36   3
  -4   2   1 78774.3 1886.53   5
  -4   2   0 177207. 3745.30   7
   4   2   0 171726. 3737.14   4
  -4  -2   0 173520. 3913.83   6
  -4   2   0 179990. 3962.39   3
  -4   2   0 182755. 3655.17   5
   4   2   1 15246.7 823.059   4
  -4  -2  -1 18577.1 929.926   6
  -4   2  -1 16865.5 887.268   3
  -4  -2  -1 18351.1 1010.83   5
  -4   2  -1 16945.4 697.913   7
  -4   2  -1 17350.6 785.198   5
  -4   2  -2 5194.96 467.400   5
   4   2   2 4641.70 525.953   4
  -4   2  -2 5578.09 553.649   3
  -4   2  -2 6084.92 356.440   7
  -4  -2  -2 4971.98 585.606   5
   4   2   3 373946. 7349.87   4
   4  -2   3 344310. 6221.46   7
  -4  -2  -3 362828. 7141.78   5
  -4   2  -3 342507. 6914.21   3
  -4   2  -3 339034. 6902.06   5
  -4  -2  -4 508.525 357.838   5
   4   2   4 193.893 427.204   4
  -4   2  -4 234.051 296.642   5
  -4   2  -4 162.215 286.382   3
   4  -2   4 6.57216 70.6330   7
   4  -2   5 7092.25 314.970   7
   4   2   5 8795.98 917.173   4
  -4   2  -5 8183.64 763.528   1
  -4   2  -5 7946.64 630.136   3
  -4  -2  -5 8924.60 799.356   5
   4  -2   6 532.848 122.476   7
  -4  -2  -6 876.038 460.358   5
  -4   2  -6 1594.48 568.307   1
  -4   2  -6 728.338 298.072   3
  -4  -2  -7 74222.7 2611.87   5
  -4   2  -7 76079.6 2680.09   1
  -4   2  -7 75632.3 2193.03   3
  -4   2  -8 1580.09 355.189   3
  -4  -2  -8 1908.50 615.357   5
   4   2   8 539.271 242.491   7
  -4   2  -8 1643.96 640.406   1
   4   2   9 14999.2 832.034   7
  -4   2  -9 17257.2 913.722   3
  -4  -2  -9 16487.7 1264.67   1
  -4   2  -9 16872.5 1330.45   1
  -4   2 -10 3449.87 804.304   1
  -4  -2 -10 3006.02 697.418   1
  -4  -2 -11 35554.8 1996.62   1
  -4   2 -11 35061.3 2112.86   1
  -4  -2 -12 2815.13 764.994   1
  -4   2 -12 3858.68 945.233   1
  -4   2 -13 45401.6 2633.92   1
  -4  -2 -13 39619.0 2335.17   1
  -4  -2 -14 5299.13 1081.42   1
   4   2  14 6572.82 1046.39   6
  -4   2 -14 5937.23 1183.16   1
  -4   2 -15 1043.97 751.359   1
   4  -2  15-105.402 746.271   6
   4   2  15 378.416 517.331   6
  -4  -2 -15 844.548 706.053   1
  -4  -2 -16 3465.66 942.319   1
   4  -2  16 2647.52 949.036   6
  -4   2 -16 2529.35 940.122   1
  -4  -2 -17 16330.2 1754.48   1
   4  -2  17 19939.7 2063.27   6
  -4   3  17 4068.79 965.380   7
  -4  -3  16 1324.16 861.048   6
  -4   3  16-86.8420 462.001   7
  -4   3  15 30057.3 2130.74   7
  -4  -3  15 28048.9 2142.32   6
  -4   3  14 897.263 472.544   4
  -4   3  14 286.828 401.663   7
  -4  -3  14 1466.54 662.584   6
  -4   3  13 806.453 533.516   7
  -4  -3  13 73.5920 759.277   6
  -4   3  13 36.1032 351.153   4
  -4   3  13 655.493 482.956   6
  -4   3  12 903.675 475.725   6
  -4  -3  12 1100.34 593.230   6
  -4   3  12 233.103 453.406   7
  -4   3  12 1046.86 380.652   4
  -4   3  11 65100.2 2426.78   4
  -4   3  11 62974.4 2375.28   6
  -4  -3  11 65823.7 2865.47   6
  -4   3  11 65813.0 2837.28   7
  -4   3  10 616.218 512.749   7
  -4   3  10 661.172 347.939   4
  -4   3  10 503.394 384.042   6
  -4  -3  10 799.197 662.131   6
  -4   3   9 92334.1 2784.24   4
  -4   3   9 95019.8 2538.15   3
  -4  -3   9 93278.6 3257.65   6
  -4   3   9 93690.9 2799.07   6
  -4   3   9 94919.3 3313.39   7
  -4   3   8 264.231 251.487   3
  -4   3   8 428.746 316.697   4
  -4  -3   8 517.532 497.282   6
  -4   3   8-277.375 333.622   6
  -4   3   8 361.108 415.080   7
  -4   3   7 48847.8 1678.52   4
  -4  -3   7 43816.0 1986.29   6
  -4   3   7 46670.0 2081.65   7
  -4   3   7 47573.7 1651.48   3
  -4   3   7 46536.2 1689.08   6
  -4   3   6 1387.78 374.996   3
  -4   3   6 997.923 265.429   4
  -4  -3   6 2375.12 588.913   6
  -4   3   6 2568.55 449.751   6
  -4   3   6 2067.09 523.242   7
  -4   3   5 201755. 4911.27   7
  -4  -3   5 197029. 4686.95   6
  -4   3   5 198124. 4159.59   4
  -4   3   5 205938. 4370.81   6
  -4   3   5 194393. 4390.91   3
  -4  -3   4 34342.2 1487.46   6
  -4   3   4 34076.7 1131.02   4
  -4   3   4 35336.7 1562.12   7
  -4   3   4 36405.1 1352.75   6
  -4   3   4 33387.8 1342.42   3
  -4   3   3 129088. 3349.85   7
  -4   3   3 120942. 2743.37   4
  -4  -3   3 127793. 3213.99   6
  -4   3   3 126888. 3141.79   3
  -4   3   2 470.420 287.372   7
  -4  -3   2 692.050 336.824   6
  -4   3   2 489.320 179.138   5
  -4   3   2 528.131 299.614   3
  -4   3   1 77735.6 2206.15   7
  -4  -3   1 75401.7 2103.37   6
  -4   3   1 75714.8 2216.96   3
  -4   3   1 74285.3 1735.25   5
   4   3  -1 78409.5 2136.78   4
   4   3   0 11950.6 757.497   4
  -4  -3   0 11753.3 739.139   6
  -4   3   0 10610.7 745.506   3
  -4   3   0 11355.1 682.534   7
  -4   3   0 11040.3 540.987   5
  -4  -3  -1 261599. 5573.75   5
   4   3   1 241107. 5361.87   4
  -4   3  -1 254694. 5082.00   7
  -4  -3  -1 259843. 5349.71   6
  -4   3  -1 253611. 5387.71   3
  -4   3  -1 249815. 4958.31   5
  -4   3  -2 1878.15 329.779   5
  -4   3  -2 1665.96 372.220   3
   4   3   2 2296.19 481.081   4
  -4  -3  -2 2694.52 468.326   5
   4   3   3 1220.50 452.905   4
  -4   3  -3 1622.62 381.630   3
  -4  -3  -3 2517.47 491.874   5
   4   3   4 12917.7 1037.03   4
  -4   3  -4 12405.2 894.035   1
  -4   3  -4 13585.8 870.309   3
  -4  -3  -4 12991.0 940.909   5
  -4   3  -5 29880.4 1323.31   3
   4   3   5 31975.1 1704.73   4
  -4   3  -5 30641.0 1475.43   1
  -4  -3  -5 31590.5 1492.63   5
  -4   3  -6 3365.94 496.057   3
  -4  -3  -6 4097.61 682.670   5
   4   3   6 4610.70 788.677   4
  -4   3  -6 2949.81 650.297   1
   4   3   7 13651.1 1300.05   4
  -4   3  -7 12543.4 1105.01   1
  -4   3  -7 11716.7 839.454   3
  -4  -3  -7 12609.2 1077.44   5
  -4  -3  -8 8038.82 924.741   5
  -4   3  -8 7634.40 676.869   3
  -4   3  -8 7558.45 985.298   1
   4   3   9 71371.4 2296.73   7
  -4  -3  -9 79762.0 2808.20   1
  -4   3  -9 75409.1 2308.30   3
  -4   3  -9 74287.7 2992.97   1
  -4  -3  -9 75988.0 2897.53   5
   4   3  10 7036.75 1160.30   4
  -4   3 -10 6165.28 1008.11   1
  -4  -3 -10 4572.83 726.750   1
  -4  -3 -11 18667.6 1410.58   1
   4   3  11 16568.3 1635.09   4
  -4   3 -11 19801.8 1631.26   1
   4   3  12-10.0903 716.570   4
  -4   3 -12 234.060 614.961   1
  -4  -3 -12 361.471 505.385   1
  -4   3 -13 16055.5 1604.77   1
   4   3  13 18154.8 1852.32   4
  -4  -3 -13 17199.2 1512.99   1
  -4   3 -14 622.305 706.657   1
  -4  -3 -14 2539.10 825.323   1
   4   3  14 2452.16 937.964   4
   4   3  15 44147.8 3038.93   4
  -4   3 -15 39986.1 2714.24   1
   4  -3  15 48827.9 3009.72   6
  -4  -3 -15 40371.1 2541.50   1
  -4  -3 -16 1221.40 758.754   1
   4  -3  16-43.1280 612.083   6
  -4   3 -16 512.479 737.314   1
   4   3  16 2333.63 1070.86   4
  -4  -3 -17 3179.42 962.126   1
  -4   4  16 24330.9 2002.05   7
  -4  -4  16 25555.5 2174.27   6
  -4  -4  15 1318.30 829.485   6
  -4   4  15 1929.99 755.579   7
  -4   4  14 14431.4 1262.56   4
  -4   4  14 13328.4 1415.15   7
  -4  -4  14 13620.5 1515.62   6
  -4   4  13 12179.5 1309.64   7
  -4   4  13 14330.3 1175.46   4
  -4  -4  13 14672.3 1497.80   6
  -4   4  12 1665.83 483.971   4
  -4   4  12 1369.76 595.612   7
  -4   4  11 5395.08 719.589   4
  -4  -4  11 3241.14 759.323   6
  -4   4  11 5579.86 877.052   7
  -4   4  10 52660.8 2464.42   7
  -4   4  10 49265.3 1900.31   6
  -4   4  10 53361.9 2130.86   4
  -4  -4  10 49529.0 2407.71   6
  -4   4   9 32947.9 1863.44   7
  -4   4   9 30767.7 1531.84   4
  -4   4   9 33158.3 1436.29   6
  -4   4   9 33849.8 1441.95   3
  -4  -4   9 36706.4 1968.43   6
  -4   4   8 19726.3 1139.80   4
  -4   4   8 19769.5 1040.88   6
  -4  -4   8 18312.4 1355.69   6
  -4   4   8 22355.6 1161.24   3
  -4   4   8 20774.1 1440.44   7
  -4   4   7 59135.4 2018.66   4
  -4   4   7 60558.7 2480.57   7
  -4   4   7 59415.2 2052.77   3
  -4  -4   7 60575.4 2390.73   6
  -4   4   7 62400.4 1933.00   6
  -4   4   6 6763.39 614.760   4
  -4   4   6 7735.56 628.071   6
  -4   4   6 6986.28 698.696   3
  -4  -4   6 5281.25 759.185   6
  -4   4   6 7858.32 868.356   7
  -4   4   5 255.617 337.855   3
  -4   4   5 1160.82 468.417   7
  -4  -4   5 775.064 538.534   6
  -4   4   5 1036.32 313.728   4
  -4   4   5 984.017 380.814   6
  -4   4   4 7490.04 576.216   4
  -4  -4   4 8015.66 804.517   6
  -4   4   4 7868.34 709.354   3
  -4   4   4 8174.82 829.252   7
  -4  -4   3 101357. 2532.35   6
  -4   4   3 102297. 2570.40   3
  -4   4   3 95589.8 2186.90   4
  -4   4   2 26306.2 1237.88   7
  -4   4   2 24034.2 1149.11   3
  -4  -4   2 23519.9 1064.96   6
  -4  -4   1 77567.6 2150.68   6
  -4   4   1 77841.9 2343.83   3
  -4   4   1 80367.4 2344.82   7
   4   4   0 70617.7 2257.27   4
  -4   4   0 66937.2 2180.95   3
  -4   4   0 67959.9 2083.29   7
  -4  -4   0 64227.6 1927.99   6
  -4   4  -1 2175.71 428.370   3
  -4   4  -1 2422.57 395.919   7
   4   4   1 3162.56 497.776   4
  -4  -4  -1 2886.88 481.438   6
  -4  -4  -1 2584.64 536.799   5
  -4   4  -2 5050.39 625.366   3
   4   4   2 5348.74 611.792   4
  -4   4  -2 4832.08 523.154   1
   4   4   3 41670.2 1874.49   4
  -4   4  -3 42702.6 1642.05   1
  -4   4  -3 41288.3 1701.80   3
  -4  -4  -3 43532.0 1746.16   5
   4   4   4 54398.9 2282.83   4
  -4   4  -4 55479.9 2025.92   3
  -4   4  -4 56126.5 2024.46   1
  -4  -4  -4 60277.4 2107.98   5
  -4  -4  -5 1530.51 522.401   5
  -4   4  -5 1948.44 498.397   3
  -4   4  -5 1303.23 483.529   1
   4   4   5 1419.91 609.754   4
   4   4   6 37889.4 2022.89   4
  -4   4  -6 34503.9 1553.90   3
  -4   4  -6 35193.4 1745.82   1
  -4  -4  -6 36446.4 1711.14   5
   4   4   7 12032.4 1276.52   4
  -4   4  -7 9594.10 827.821   3
  -4   4  -7 10593.0 1069.18   1
  -4  -4  -7 10216.5 994.100   5
  -4  -4  -8 2350.61 655.468   5
  -4   4  -8 1470.93 369.522   3
  -4   4  -8 1692.76 654.888   1
   4   4   8 2252.11 653.984   4
   4   4   9 13584.2 1345.97   4
  -4   4  -9 11851.6 1240.44   1
  -4  -4  -9 13410.1 1113.60   1
  -4   4  -9 14372.6 983.884   3
   4   4   9 11538.8 868.327   2
  -4  -4  -9 12642.1 1158.25   5
   4   4  10 51258.9 2768.72   4
   4   4  10 42993.6 1847.54   7
  -4  -4 -10 44504.0 2103.87   1
  -4   4 -10 50440.3 2564.65   1
  -4   4 -11 17281.6 1589.58   1
   4   4  11 19884.3 1806.05   4
  -4  -4 -11 20883.6 1480.40   1
   4   4  12 6189.36 1129.66   4
  -4  -4 -12 7107.04 982.202   1
  -4   4 -12 5799.33 995.130   1
   4   4  13 15088.0 1743.46   4
  -4   4 -13 15039.2 1618.93   1
  -4  -4 -13 15537.2 1412.26   1
   4  -4  14 3183.39 1085.91   6
   4   4  14 2318.38 771.784   4
  -4  -4 -14 2315.56 715.455   1
  -4   4 -14 2107.41 894.115   1
   4   4  15-24.9580 698.223   4
  -4  -4 -15 635.134 647.096   1
  -4   4 -15 1169.33 892.272   1
   4  -4  15-24.5464 637.199   6
   4   4  16 1846.61 802.908   4
  -4   4 -16 3597.66 1130.83   1
   4  -4  16 2525.63 981.616   6
  -4   5  16 3478.86 885.893   7
  -4  -5  15 1893.69 915.613   6
  -4   5  15 13.4864 514.512   7
  -4   5  14 12667.2 1410.69   7
  -4  -5  14 11777.7 1486.15   6
  -4   5  13 339.331 530.497   7
  -4  -5  13 1136.88 817.858   6
  -4   5  13 960.090 454.658   4
  -4   5  12 43266.8 2107.22   4
  -4  -5  12 43027.1 2467.36   6
  -4   5  12 40360.7 2380.05   7
  -4   5  11 2078.71 617.736   7
  -4   5  11 1046.36 379.609   4
  -4  -5  11 555.506 701.174   6
  -4   5  10 9049.81 895.119   4
  -4   5  10 10658.6 1160.55   7
  -4  -5  10 9461.12 1153.49   6
  -4   5   9 2492.65 483.092   3
  -4   5   9 1767.80 450.473   4
   4   5  -9 2020.11 546.497   2
  -4  -5   9 1865.04 677.400   6
  -4   5   9 2628.33 684.373   7
  -4   5   8 42052.9 1801.63   4
  -4   5   8 46503.9 2259.95   7
  -4   5   8 44386.0 1608.56   6
  -4  -5   8 46879.3 2211.17   6
  -4   5   8 45296.8 1846.41   3
   4   5  -8 45322.9 1950.20   2
  -4   5   7 7068.24 763.714   3
  -4   5   7 7190.33 701.712   4
  -4   5   7 7357.13 921.167   7
  -4   5   7 8124.07 665.671   6
  -4  -5   7 7757.01 948.883   6
  -4   5   6 16868.0 1034.43   4
  -4   5   6 17515.0 1312.58   7
  -4  -5   6 16666.9 1217.02   6
  -4   5   6 18667.3 976.870   6
  -4   5   6 18040.7 1135.86   3
  -4   5   5 10631.4 787.223   4
  -4   5   5 12936.6 1097.60   7
  -4  -5   5 11232.4 963.920   6
  -4   5   5 11947.5 934.326   3
  -4  -5   4 39738.8 1682.16   6
  -4   5   4 43859.4 1789.76   3
  -4   5   4 37923.5 1510.54   4
  -4   5   4 40361.3 1872.31   7
  -4   5   3 6449.90 736.940   3
  -4  -5   3 4885.82 627.936   6
  -4   5   3 4934.91 689.047   7
  -4   5   2 97381.8 2966.24   7
  -4   5   2 91434.1 1980.28   1
  -4  -5   2 99455.2 2689.11   6
  -4   5   2 97662.8 2899.69   3
  -4   5   1 4873.32 674.120   3
  -4   5   1 3795.91 331.079   1
  -4   5   1 5234.41 664.186   7
  -4  -5   1 3621.15 509.622   6
  -4   5   0 17146.8 783.409   1
  -4   5   0 18255.5 1093.82   7
  -4  -5   0 17951.1 918.379   6
  -4   5   0 18018.2 1176.87   3
   4  -5   0 17246.4 603.052   5
   4   5   0 18857.2 1203.12   4
  -4   5  -1 8596.85 847.385   3
  -4  -5  -1 8140.80 664.493   6
  -4   5  -1 7147.63 576.201   1
   4   5   1 8731.53 891.706   4
  -4  -5  -1 6560.99 724.077   5
   4   5   2 235801. 5719.68   4
  -4   5  -2 232453. 5056.51   1
  -4  -5  -2 241383. 5520.42   5
  -4   5  -2 238094. 5542.70   3
  -4   5  -3 3671.40 655.679   3
   4   5   3 3583.84 704.932   4
  -4   5  -3 2880.11 487.446   1
  -4  -5  -3 3675.90 636.673   5
   4   5   4 22846.5 1528.11   4
  -4   5  -4 23411.5 1384.24   3
  -4   5  -4 23883.3 1307.54   1
  -4  -5  -4 25034.7 1351.00   5
   4   5   5 33995.7 1925.69   4
  -4   5  -5 32439.8 1637.72   3
  -4   5  -5 33594.2 1654.13   1
  -4  -5  -5 35625.2 1641.42   5
   4   5   6 39368.4 2160.58   4
  -4   5  -6 35300.3 1698.65   3
  -4  -5  -6 39385.4 1790.02   5
  -4   5  -6 36138.8 1817.61   1
  -4   5  -7 1568.38 722.894   1
  -4  -5  -7 1170.15 472.350   5
  -4   5  -7 649.523 414.339   3
   4   5   7 997.618 577.543   4
   4   5   8 118229. 4212.26   4
  -4   5  -8 113240. 3386.47   3
   4   5   8 107778. 3242.27   2
  -4  -5  -8 108427. 3533.39   5
  -4   5  -8 110860. 3787.77   1
  -4  -5  -9 3430.76 731.940   5
  -4   5  -9 3944.02 641.793   3
   4   5   9 2982.16 789.609   4
   4   5   9 3550.99 588.865   2
  -4  -5  -9 3860.97 664.880   1
  -4   5  -9 2161.58 733.061   1
  -4  -5 -10 5812.19 809.011   1
   4   5  10 8169.43 1284.82   4
  -4   5 -10 7145.33 1074.17   1
  -4   5 -11 6801.04 1139.87   1
   4   5  11 5404.41 1092.16   4
  -4  -5 -11 4650.22 731.455   1
   4   5  12 17036.0 1759.71   4
  -4   5 -12 15026.8 1576.75   1
  -4  -5 -12 14262.5 1252.28   1
   4   5  13 1500.13 793.152   4
  -4  -5 -13 1751.46 670.492   1
  -4   5 -13-210.479 686.634   1
   4   5  14 12179.0 1608.00   4
   4  -5  14 10664.7 1526.93   6
  -4   5 -14 13314.7 1683.38   1
   4   5  15 1550.66 878.644   4
   4  -5  15-420.417 852.676   6
  -4   5 -15 1399.40 961.153   1
  -4  -6  15 1203.58 788.736   6
  -4   6  15 548.281 454.526   7
  -4   6  14 15760.6 1613.17   7
  -4  -6  14 13273.2 1555.84   6
  -4   6  13 2922.92 712.433   7
  -4  -6  13 4158.89 1086.43   6
  -4   6  13 1456.13 525.772   4
  -4  -6  12 2947.38 919.846   6
  -4   6  12 3347.29 657.632   4
  -4   6  12 2267.00 719.813   7
  -4   6  11 457.374 372.746   4
  -4  -6  11 1458.76 703.553   6
  -4   6  11 970.578 566.039   7
  -4   6  10 24004.3 1496.98   4
  -4   6  10 24239.0 1764.69   7
  -4  -6  10 21638.8 1650.83   6
  -4   6   9 6425.57 749.460   3
  -4   6   9 6634.40 996.706   7
  -4   6   9 5124.31 729.966   4
  -4  -6   9 4827.38 896.098   6
   4   6  -9 5432.49 763.908   2
  -4   6   8 10206.7 1119.08   7
  -4   6   8 8071.02 814.339   4
   4   6  -8 9279.88 991.661   2
  -4  -6   8 8583.02 1034.33   6
  -4   6   8 9883.64 911.405   3
  -4   6   7 27040.6 1458.65   4
  -4   6   7 26596.5 1735.57   7
  -4   6   7 29808.6 1577.24   3
  -4  -6   7 28195.1 1665.77   6
   4   6  -7 32377.2 1733.45   2
  -4   6   6 28252.3 1734.26   7
  -4   6   6 25517.4 1391.90   4
  -4  -6   6 26442.8 1538.53   6
  -4   6   6 28633.9 1560.55   3
   4   6  -6 25921.6 1610.98   2
  -4   6   5-741.895 404.856   3
  -4   6   5-342.612 456.142   7
  -4  -6   5 474.659 470.975   6
  -4   6   5 213.147 311.992   4
  -4   6   4 20270.2 1170.41   4
  -4   6   4 21691.4 1483.90   7
  -4  -6   4 22107.1 1290.22   6
  -4   6   4 21917.7 1375.60   3
  -4   6   3 3047.31 649.052   3
  -4   6   3 4672.38 763.289   7
  -4  -6   3 2785.76 567.391   6
  -4  -6   2 62926.7 2099.75   6
  -4   6   2 62909.3 2431.61   7
  -4   6   2 61742.1 2375.32   3
  -4   6   1 19254.1 1295.87   3
  -4   6   1 20726.0 1346.86   7
  -4  -6   1 19677.1 1059.91   6
  -4   6   1 20526.5 712.197   1
   4   6   0 120307. 3614.64   4
  -4   6   0 118484. 3411.26   7
  -4  -6   0 117176. 2923.21   6
  -4   6   0 120336. 3556.98   3
  -4   6   0 110293. 2600.35   1
  -4   6  -1 6561.90 829.769   3
   4   6   1 8333.27 964.379   4
  -4  -6  -1 7611.17 641.831   6
  -4   6  -1 6688.07 556.522   1
  -4  -6  -1 8089.63 823.058   5
  -4   6  -2 736.861 517.959   3
  -4   6  -2 782.426 348.778   1
   4   6   2 1271.90 652.842   4
  -4  -6  -2 613.582 470.049   5
  -4   6  -3 8317.95 915.862   3
   4   6   3 6708.89 899.769   4
  -4  -6  -3 8903.74 833.823   5
  -4   6  -3 7900.23 721.674   1
  -4   6  -4 197291. 5156.57   3
  -4  -6  -4 204353. 4877.38   5
  -4   6  -4 201612. 4822.40   1
  -4  -6  -5 1817.52 503.383   5
  -4   6  -5 915.024 521.657   3
   4   6   5 2360.36 756.887   4
  -4   6  -5 2936.70 650.747   1
   4   6   6 161776. 5152.45   4
  -4   6  -6 165929. 4651.14   3
   4   6   6 166123. 4530.42   2
  -4  -6  -6 172484. 4478.61   5
  -4   6  -6 167902. 4637.13   1
  -4  -6  -7 4966.74 724.703   5
   4   6   7 6602.99 1016.85   4
  -4   6  -7 5998.16 813.400   3
   4   6   7 4558.75 770.615   2
  -4   6  -7 6273.48 898.096   1
   4   6   8 7404.67 860.721   2
   4   6   8 8395.42 1153.96   4
  -4   6  -8 9858.04 1003.23   3
  -4  -6  -8 9933.80 979.274   5
  -4   6  -8 7894.45 1020.69   1
  -4  -6  -9-648.393 483.903   5
  -4   6  -9 832.293 632.485   1
  -4   6  -9 419.156 478.825   3
   4   6   9-332.708 375.470   2
   4   6   9 737.798 630.709   4
  -4  -6  -9 9.68073 373.252   1
  -4   6 -10 56439.1 2834.20   1
   4   6  10 51853.1 2951.31   4
  -4  -6 -10 57212.9 2332.65   1
  -4  -6 -10 52427.5 2501.81   5
   4   6  11 5580.53 1139.03   4
  -4   6 -11 6374.97 1051.61   1
  -4  -6 -11 6419.99 815.589   1
   4   6  12 22440.1 2086.97   4
  -4   6 -12 27222.1 2158.39   1
   4   6  13 1075.92 618.326   4
   4  -6  13 1213.40 733.525   6
   4   6  14 2459.06 824.649   4
   4  -6  14 1184.40 716.204   6
  -4   6 -14 2650.52 989.942   1
  -4   6 -15 1488.94 945.990   1
   4   6  15 1045.74 788.606   4
   4  -6  15 642.252 913.484   6
  -4  -7  14 207.980 523.396   6
  -4   7  14 1099.05 667.605   7
  -4   7  13 1143.81 588.585   7
  -4  -7  13-426.451 740.053   6
  -4  -7  12 11054.9 1390.84   6
  -4   7  12 9868.41 1085.78   4
  -4   7  12 10013.4 1353.87   7
  -4   7  11 15827.3 1328.67   4
  -4   7  11 16165.1 1584.84   7
  -4  -7  11 15436.1 1520.36   6
  -4   7  10-52.4464 418.232   7
  -4   7  10 155.476 302.259   4
  -4  -7  10 561.954 582.047   6
  -4   7   9 1869.29 545.199   3
  -4   7   9 2713.27 757.267   7
  -4   7   9 2040.06 547.088   4
  -4  -7   9 2240.16 789.699   6
   4   7  -9 2694.19 607.361   2
  -4   7   8 4644.47 761.291   3
  -4   7   8 2813.29 579.800   4
  -4  -7   8 2793.32 721.146   6
  -4   7   8 2752.19 679.915   7
   4   7  -8 4062.56 784.633   2
  -4   7   7 24129.6 1477.33   4
  -4   7   7 25202.1 1810.61   7
  -4   7   7 27973.4 1640.41   3
   4   7  -7 24125.4 1609.00   2
  -4  -7   7 27537.7 1687.09   6
  -4   7   6 8534.01 874.590   4
   4   7  -6 10648.8 1120.70   2
  -4  -7   6 10460.8 1052.64   6
  -4   7   6 10592.0 1188.26   7
  -4   7   6 11122.3 1066.58   3
  -4   7   5 87522.7 2920.41   4
  -4   7   5 92925.3 3468.94   7
  -4   7   5 93723.6 3184.29   3
  -4  -7   5 85621.1 2938.39   6
   4   7  -5 95353.2 3354.98   2
  -4   7   4 21498.3 1425.63   3
  -4   7   4 20031.6 1486.56   7
  -4  -7   4 19536.3 1235.56   6
   4   7  -4 21882.3 1532.50   2
  -4   7   3 541.210 553.909   3
   4   7  -3 402.113 685.637   2
  -4  -7   3 74.6807 377.034   6
  -4   7   3-242.201 461.168   7
   4   7  -2 30362.5 1784.92   2
  -4   7   2 28558.6 1663.80   3
  -4  -7   2 26910.0 1329.48   6
  -4   7   2 27722.6 1691.82   7
  -4  -7   1 81071.5 2413.33   6
  -4   7   1 83272.6 2991.90   3
   4   7  -1 82115.6 3060.49   2
  -4   7   1 81772.9 2957.06   7
  -4   7   0 28174.6 1678.57   3
   4   7   0 27052.7 1714.42   2
  -4  -7   0 27660.8 1226.61   6
  -4   7  -1 67786.2 1934.34   1
   4   7   1 73855.5 2911.40   4
  -4  -7  -1 70709.0 2114.27   6
  -4   7  -1 69427.6 2747.77   3
  -4  -7  -1 67500.3 2480.00   5
   4   7   1 68226.0 2761.84   2
  -4   7  -2 106071. 2818.45   1
   4   7   2 112034. 3822.93   4
  -4   7  -2 107709. 3608.37   3
  -4  -7  -2 112453. 3324.20   5
   4   7   2 102347. 3570.54   2
  -4   7  -3 908.563 363.985   1
  -4   7  -3 801.580 601.220   3
   4   7   3 660.242 680.819   2
   4   7   3 324.811 473.180   4
  -4  -7  -3 340.591 410.302   5
  -4   7  -4 21661.4 1268.57   1
   4   7   4 21479.3 1660.95   4
  -4   7  -4 21513.9 1530.74   3
   4   7   4 21126.4 1522.10   2
  -4  -7  -4 23674.2 1349.28   5
  -4   7  -5 62696.1 2404.37   1
   4   7   5 59252.6 2884.14   4
  -4   7  -5 65793.4 2717.72   3
   4   7   5 63102.0 2633.74   2
  -4  -7  -5 64998.4 2386.87   5
  -4   7  -6 23463.4 1496.02   1
   4   7   6 23210.9 1778.82   4
  -4   7  -6 26346.7 1684.55   3
   4   7   6 25007.7 1607.12   2
  -4  -7  -6 23069.1 1407.38   5
   4   7   7 7569.71 933.493   2
  -4  -7  -7 6952.02 829.023   5
  -4   7  -7 6820.12 922.471   3
   4   7   7 6269.13 1052.82   4
  -4   7  -7 6949.94 907.562   1
  -4   7  -8 24600.7 1710.88   1
   4   7   8 21563.9 1841.56   4
   4   7   8 23648.7 1566.36   2
  -4   7  -8 23702.8 1619.49   3
  -4  -7  -8 21951.0 1462.76   5
  -4  -7  -9 7824.55 929.317   5
   4   7   9 6513.68 1156.79   4
   4   7   9 5431.53 791.273   2
  -4   7  -9 6199.38 892.375   3
  -4   7  -9 6932.06 1087.27   1
  -4  -7 -10 3306.81 732.007   5
   4   7  10 4315.21 981.247   4
  -4   7 -10 5447.33 1039.31   1
   4   7  11 19543.7 1945.47   4
  -4   7 -11 19906.5 1835.15   1
   4  -7  12 7723.75 1336.88   6
   4   7  12 6192.12 1144.16   4
  -4   7 -12 8021.23 1331.34   1
   4   7  13-93.2758 749.660   4
   4  -7  13-142.803 740.299   6
  -4   7 -13 120.175 580.902   1
  -4   7 -14 3218.63 1052.15   1
   4   7  14 3173.78 964.203   4
   4  -7  14 3534.28 1022.05   6
  -4   8  13 10761.8 1393.14   7
  -4  -8  13 14783.0 1666.11   6
  -4   8  12 1149.65 684.289   7
  -4   8  12 1331.26 520.104   4
  -4   8  11 1183.99 699.304   7
  -4   8  11 35.9185 407.526   4
  -4  -8  11 1945.20 838.996   6
  -4   8  10 2056.03 695.425   7
  -4   8  10 2214.51 604.073   4
  -4  -8  10 2416.37 865.042   6
  -4   8   9 32436.1 1923.35   4
  -4   8   9 30689.3 2181.35   7
  -4  -8   9 31855.1 2008.02   6
  -4   8   9 34421.9 1942.89   3
   4   8  -9 34359.7 2027.04   2
   4   8  -8 9405.62 1151.18   2
  -4   8   8 9679.84 1040.19   4
  -4   8   8 9445.20 1194.96   7
  -4  -8   8 10858.9 1127.09   6
  -4   8   8 12167.4 1156.03   3
  -4   8   7 25912.3 1897.40   7
  -4  -8   7 21037.3 1515.16   6
   4   8  -7 22051.4 1643.99   2
  -4   8   7 24769.7 1655.55   3
  -4   8   7 23926.9 1580.35   4
  -4   8   6 947.356 535.540   3
   4   8  -6 1283.21 659.159   2
  -4   8   6 746.636 434.068   4
  -4  -8   6 1321.49 521.169   6
  -4   8   6 164.048 461.604   7
  -4   8   5 1380.42 641.228   3
   4   8  -5 1413.09 665.506   2
  -4   8   5-60.3842 503.184   7
  -4  -8   5 190.876 484.012   6
   4   8  -4 595.332 659.901   2
  -4   8   4 86.6797 459.482   7
  -4  -8   4-50.0861 404.676   6
  -4  -8   3 98512.6 3071.62   6
  -4   8   3 109757. 3857.02   7
  -4   8   3 105598. 3613.43   3
   4   8  -3 101427. 3709.65   2
  -4   8   2 8052.82 1029.13   3
   4   8  -2 6606.45 987.060   2
  -4  -8   2 6778.35 711.705   6
  -4  -8   1 36307.3 1503.25   6
  -4   8   1 37938.1 2065.05   3
   4   8  -1 42230.4 2256.07   2
  -4   8   0 1420.12 731.422   3
   4   8   0 992.251 712.050   2
  -4  -8   0 204.833 254.237   6
  -4   8  -1 2682.72 723.647   3
   4   8   1 6059.84 953.795   4
   4   8   1 5063.37 892.084   2
  -4  -8  -1 3379.07 457.296   6
  -4  -8  -1 4066.32 680.999   5
  -4   8  -2 2543.33 710.556   3
   4   8   2 1904.50 651.125   2
   4   8   2 2945.27 754.916   4
  -4  -8  -2 3250.40 602.317   5
  -4   8  -3 59341.4 2683.78   3
   4   8   3 58524.1 2656.51   2
  -4  -8  -3 56268.5 2239.13   5
  -4   8  -3 59540.6 2049.95   1
   4   8   3 54686.8 2776.47   4
  -4  -8  -4 778.140 401.759   5
   4   8   4 781.689 673.936   4
  -4   8  -4 240.369 578.144   3
   4   8   4 737.643 614.769   2
  -4   8  -4 89.5573 371.377   1
  -4  -8  -5 91.3249 349.203   5
  -4   8  -5 799.263 620.509   3
   4   8   5 433.120 581.040   2
  -4   8  -5 616.899 442.331   1
   4   8   5 1142.57 658.079   4
  -4  -8  -6 889.559 435.987   5
  -4   8  -6 227.781 628.190   3
   4   8   6 1661.66 688.362   2
  -4   8  -6 249.773 379.767   1
   4   8   6 496.863 522.153   4
  -4   8  -7 23297.6 1600.88   1
   4   8   7 21174.3 1859.61   4
   4   8   7 23549.5 1630.25   2
  -4   8  -7 22917.6 1691.28   3
  -4  -8  -7 22341.2 1433.08   5
  -4  -8  -8 3059.99 635.949   5
   4   8   8 2106.14 643.028   2
  -4   8  -8 4688.87 910.691   3
   4   8   8 2996.15 919.375   4
  -4   8  -8 2410.33 620.631   1
   4   8   9 8096.89 983.652   2
  -4   8  -9 9011.70 1176.82   1
  -4   8  -9 9153.27 1087.66   3
   4   8   9 9145.33 1308.85   4
  -4  -8  -9 9362.06 1026.99   5
  -4  -8 -10 1481.04 575.972   5
   4   8  10 666.998 502.200   4
  -4   8 -10 717.641 670.843   1
  -4   8 -11 3875.82 907.038   1
   4   8  11 3953.38 981.962   4
   4   8  12 1534.55 707.111   4
   4  -8  12 3034.14 1006.57   6
   4   8  13 20230.9 2127.11   4
   4  -8  13 24150.9 2213.81   6
  -4  -9  12 4009.47 944.351   6
  -4   9  12 1595.62 777.435   7
  -4   9  11 9121.61 1148.21   4
  -4   9  11 8539.10 1349.74   7
  -4   9  10 2719.03 710.116   4
  -4   9  10 3376.95 903.403   7
  -4  -9  10 2905.69 819.729   6
  -4   9   9 10300.5 1159.16   3
   4   9  -9 12336.1 1331.14   2
  -4   9   9 11205.9 1431.95   7
  -4  -9   9 11121.1 1287.13   6
  -4   9   9 10509.1 1178.95   4
   4   9  -8 4052.19 850.306   2
  -4   9   8 4124.15 948.851   7
  -4   9   8 4415.55 884.839   3
  -4  -9   8 4748.52 930.050   6
  -4   9   8 3184.57 701.536   4
   4   9  -7 7073.21 1158.15   2
  -4   9   7 4952.26 858.053   3
  -4   9   7 6464.44 1086.24   7
  -4   9   7 6915.99 933.864   4
  -4  -9   7 7157.16 963.694   6
   4   9  -6 1163.28 695.042   2
  -4   9   6 1089.77 549.894   3
  -4   9   6 758.703 696.094   7
  -4  -9   6 1041.23 589.828   6
  -4  -9   5 41236.3 2006.33   6
   4   9  -5 41353.1 2390.47   2
  -4   9   5 42529.7 2301.18   3
  -4   9   5 44353.6 2559.65   7
   4   9  -4 9751.45 1222.04   2
  -4   9   4 9816.30 1261.75   7
  -4  -9   4 10400.5 977.398   6
  -4   9   4 12358.9 1285.31   3
  -4  -9   3 13262.6 1036.87   6
   4   9  -3 13358.5 1413.26   2
  -4   9   3 13665.6 1327.86   3
   4   9  -2 10332.6 1255.41   2
  -4  -9   2 9782.89 834.478   6
  -4   9   2 11913.7 1259.28   3
   4   9  -1 6407.66 1042.37   2
  -4   9   1 7113.21 1039.92   3
  -4   9   0 877.876 737.297   3
   4   9   0 775.546 668.847   2
  -4  -9   0 793.817 413.253   5
  -4   9  -1 16981.2 1513.90   3
   4   9   1 18171.7 1584.40   2
  -4  -9  -1 18630.2 1324.56   5
  -4   9  -2 13276.3 1341.63   3
   4   9   2 15296.6 1520.66   4
   4   9   2 16672.3 1534.22   2
  -4  -9  -2 12826.5 1093.08   5
   4   9   3 3914.15 941.141   4
   4   9   3 3921.75 873.151   2
  -4   9  -3 3608.21 783.115   3
  -4  -9  -3 2192.76 511.915   5
   4   9   4 11793.3 1388.49   4
  -4  -9  -4 11464.8 995.507   5
  -4   9  -4 11430.4 1295.66   3
   4   9   4 12493.1 1364.61   2
  -4  -9  -5 5051.82 682.435   5
   4   9   5 4333.75 859.538   2
  -4   9  -5 6145.01 1048.03   3
   4   9   5 3784.83 929.843   4
  -4  -9  -6 5072.57 697.156   5
  -4   9  -6 6305.30 1039.01   3
   4   9   6 5691.47 958.718   2
   4   9   6 4479.37 1008.70   4
  -4  -9  -7 709.998 375.339   5
   4   9   7 561.293 597.157   2
   4   9   7 677.655 679.648   4
  -4   9  -7 2545.71 866.365   3
   4   9   8 12646.1 1588.73   4
   4   9   8 13220.8 1344.00   2
  -4   9  -8 14235.5 1390.39   3
  -4   9  -9 7672.57 1087.48   3
   4  -9   9 9781.97 1346.30   6
   4   9   9 6774.95 1278.21   4
   4   9  10 1038.67 553.309   4
   4  -9  10 2352.83 946.397   6
   4   9  11 2547.89 871.550   4
   4  -9  11 3200.82 1006.80   6
   4   9  12 1989.85 843.593   4
   4  -9  12 4546.69 1143.07   6
  -4  10  11 913.441 779.071   7
  -4 -10  11 1050.86 642.161   6
  -4  10  10 18694.6 1664.97   4
  -4 -10  10 17208.7 1642.13   6
  -4  10  10 18835.3 1886.54   7
   4  10  -9 2567.13 808.294   2
  -4  10   9 560.829 609.864   3
  -4  10   9 642.705 623.830   7
  -4  10   9 701.619 416.522   4
  -4 -10   9 2363.96 686.593   6
   4  10  -8 5305.59 1031.16   2
  -4  10   8 5179.20 896.278   3
  -4  10   8 4813.68 1046.18   7
  -4  10   8 5758.12 929.030   4
  -4 -10   8 5172.99 899.622   6
  -4  10   7 3978.94 947.129   3
   4  10  -7 5177.09 1065.61   2
  -4  10   7 4695.15 1043.39   7
  -4 -10   7 4667.52 861.350   6
   4  10  -6 9509.24 1275.35   2
  -4  10   6 10550.9 1417.17   7
  -4 -10   6 9397.90 1047.72   6
  -4  10   6 9169.55 1233.92   3
   4  10  -5 1080.12 604.518   2
  -4  10   5 1176.06 637.178   3
  -4 -10   5 1386.49 533.648   6
   4  10  -4 10367.8 1325.33   2
  -4 -10   4 11793.7 1029.05   6
  -4  10   4 12388.0 1374.47   3
   4  10  -3 1718.57 755.418   2
  -4  10   3 1057.19 655.099   3
   4  10  -2 588.658 686.267   2
  -4  10   2 2678.29 776.320   3
   4  10  -1 9947.83 1278.70   2
  -4  10   1 9218.34 1254.43   3
   4  10   0 18199.5 1662.36   2
  -4  10   0 18594.5 1696.08   3
  -4 -10   0 19485.2 1393.12   5
  -4  10  -1 2994.68 896.055   3
   4  10   1 4291.05 984.297   2
  -4 -10  -1 2693.27 605.062   5
   4  10   2 2214.59 827.502   2
  -4  10  -2 1902.73 741.629   3
  -4 -10  -2 2515.14 610.062   5
  -4  10  -3 1121.40 875.594   3
   4  10   3-323.829 667.477   4
   4  10   3 328.828 671.577   2
  -4 -10  -3 58.0638 371.910   5
   4  10   4 14371.1 1622.26   4
   4  10   4 19572.7 1708.82   2
  -4  10  -4 16874.1 1710.94   3
   4  10   5 56.4557 607.886   4
   4  10   5 553.370 624.241   2
  -4  10  -5 693.194 644.333   3
   4  10   6 10818.8 1253.30   2
  -4  10  -6 9679.01 1312.78   3
   4  10   6 11719.8 1549.12   4
   4  10   7 815.229 595.761   2
   4 -10   7 355.342 639.497   6
   4  10   7 760.572 569.334   4
  -4  10  -7 868.008 630.107   3
  -4  10  -8 895.146 703.123   3
   4  10   8 841.744 545.659   2
   4  10   8 1689.29 865.413   4
   4 -10   8 1003.47 658.498   6
  -4  10  -9-598.990 614.377   3
   4  10   9-199.545 628.572   4
   4 -10   9-196.565 588.472   6
   4  10  10 10862.5 1652.74   4
   4 -10  10 10762.3 1501.47   6
   4  10  11 3190.49 939.790   4
   4 -10  11 8367.02 1395.97   6
  -4 -11  10 1179.52 679.280   6
  -4  11   9 3282.03 1036.31   7
  -4 -11   9 1923.30 826.040   6
   4  11  -8 10876.8 1430.17   2
  -4  11   8 12502.0 1445.88   3
  -4 -11   8 12555.8 1326.66   6
   4  11  -7 247.253 672.089   2
  -4  11   7 474.237 645.686   3
  -4 -11   7 803.937 525.446   6
   4  11  -6 8774.90 1378.19   2
  -4  11   6 7395.64 1187.36   3
   4  11  -5 196.848 628.823   2
  -4  11   5-329.041 557.924   3
   4  11  -4 1827.08 879.080   2
  -4  11   4 13.7483 644.929   3
   4  11  -3 580.317 658.029   2
  -4  11   3 843.137 709.052   3
   4  11  -2 13484.9 1558.37   2
  -4  11   2 10895.1 1411.84   3
   4  11  -1 684.874 679.844   2
  -4  11   1-81.0015 687.072   3
  -4 -11   1-371.784 428.989   5
   4  11   0 597.449 652.696   2
  -4  11   0 1045.62 807.824   3
   4  11   1-169.962 609.120   2
  -4  11  -1 252.061 711.615   3
   4  11   2 26077.3 2084.25   2
  -4  11  -2 29685.7 2262.64   3
  -4  11  -3 78.6813 666.689   3
   4  11   3-280.240 640.165   2
  -4  11  -4 3124.80 886.683   3
   4  11   4 3442.88 835.051   2
   4  11   4 2865.47 903.979   4
   4  11   5 358.779 678.234   2
   4  11   5 1015.87 841.417   4
  -4  11  -5-91.4317 618.912   3
   4  11   6 4174.71 977.732   2
  -4  11  -6 4011.35 1054.80   3
   4  11   6 3772.65 1064.08   4
   4  11   7 491.300 710.704   2
  -4  11  -7 274.673 665.084   3
   4  11   7 573.131 698.175   4
   4 -11   7 166.826 559.500   6
   4  11   8 10466.3 1314.33   2
  -4  11  -8 13188.8 1581.05   3
   4 -11   8 12186.8 1451.58   6
   4  11   8 11169.9 1713.07   4
  -4  11  -9 546.364 731.331   3
   4 -11   9-490.532 711.296   6
   4  11   9-36.3367 670.238   4
   4 -11  10 239.354 682.683   6
   4  12  -8 54.0648 572.125   2
  -4  12   8 1300.76 835.531   3
   4  12  -7 5091.72 1123.40   2
  -4  12   7 5223.34 1100.10   3
   4  12  -6 2296.18 900.963   2
  -4  12   6 3692.51 983.266   3
   4  12  -5 2029.26 912.712   2
  -4  12   5-596.667 745.985   3
   4  12  -4 765.239 704.734   2
  -4  12   4 1626.39 864.751   3
   4  12  -3 4048.15 1126.00   2
  -4  12   3 3742.64 1023.18   3
   4  12  -2 3274.59 964.499   2
  -4  12   2 2977.98 990.303   3
   4  12  -1 6682.96 1304.83   2
  -4  12   1 5088.66 1126.55   3
   4  12   0 11941.3 1581.20   2
  -4  12   0 10892.5 1459.09   3
   4  12   1 1689.28 925.547   2
  -4  12  -1 1646.17 705.388   3
   4  12   2 988.320 709.423   2
  -4  12  -2-749.341 791.885   3
  -4  12  -3 569.212 818.696   3
   4  12   3-210.908 667.832   2
   4  12   4 9646.02 1453.49   2
  -4  12  -4 10874.3 1527.94   3
   4  12   5-61.9198 624.111   2
  -4  12  -5 428.929 735.494   3
   4  12   6 7648.04 1236.30   2
   4  12   6 7402.45 1363.54   4
  -4  12  -6 9414.63 1494.07   3
   4  12   7 1708.87 766.121   2
  -4  12  -7 1858.64 1054.00   3
   4  12   8 531.245 629.888   2
  -4  12  -8-8.93986 591.864   3
  -4  12  -9 984.065 768.126   3
  -4  13   3 1089.44 699.509   3
   4  13  -2 1158.50 942.847   2
  -4  13   2 70.5723 745.175   3
   4  13  -1 5151.80 1221.26   2
  -4  13   1 5314.34 1194.92   3
   4  13   0 533.100 905.961   2
  -4  13   0 108.895 723.888   3
   4  13   1 8159.59 1419.87   2
  -4  13  -1 10562.1 1550.96   3
   4  13   2 3789.86 1043.36   2
  -4  13  -2 2857.07 907.416   3
  -4  13  -3 886.783 990.517   3
  -5   0  17-338.985 709.232   6
  -5   0  16 5202.53 1005.35   6
  -5   0  15 874.614 588.188   6
  -5   0  14 7437.93 1069.45   6
  -5   0  13 482.947 542.175   6
  -5   0  12 81200.7 3121.85   6
  -5   0  11 498.200 485.183   6
  -5   0  10 182.851 550.995   6
  -5   0   9 115.153 221.388   3
  -5   0   9 196.129 458.460   6
  -5   0   8 96435.5 3027.74   6
  -5   0   7 667.163 487.948   6
  -5   0   6 96726.1 2855.92   6
  -5   0   5-300.207 453.576   6
  -5   0   4 114505. 3038.04   6
  -5   0   3 136.121 371.632   6
  -5   0   2 327025. 6678.89   6
  -5   0   1 122.058 437.578   6
   5   0   0 2196.94 246.396   4
  -5   0   0 1344.11 404.589   5
  -5   0  -1 581.596 329.086   5
  -5   0  -2 335423. 6867.29   5
  -5   0  -3-2.90400 311.082   5
  -5   0  -4 259934. 5771.06   5
  -5   0  -5 550.084 443.382   5
  -5   0  -6 7664.26 849.240   5
  -5   0  -7 554.241 533.691   5
  -5   0  -8 40964.8 2011.03   1
  -5   0  -8 42316.9 2059.52   5
  -5   0  -9-545.835 479.974   1
  -5   0 -10 156.076 589.375   1
  -5   0 -11 389.472 598.426   1
  -5   0 -12 16862.1 1518.43   1
  -5   0 -13-119.096 569.910   1
  -5   0 -14 2240.31 812.045   1
  -5   0 -15 1866.80 790.643   1
   5   0  16 8589.71 1291.96   6
  -5   0 -16 8010.54 1323.98   1
   5   0  17 295.447 553.852   6
  -5   1  17 2614.66 826.847   7
  -5  -1  17 2387.84 876.674   6
  -5  -1  16 4815.88 1026.90   6
  -5   1  16 3137.29 814.097   6
  -5   1  15 2399.41 774.783   6
  -5  -1  15 2854.54 846.157   6
  -5  -1  14 19156.0 1625.26   6
  -5   1  14 17648.9 1516.14   6
  -5  -1  13 30906.1 1969.86   6
  -5   1  13 33538.5 1957.83   6
  -5   1  12 1616.72 589.311   6
  -5  -1  12 1813.42 651.493   6
  -5  -1  11 6218.61 886.083   6
  -5   1  11 5318.01 792.476   6
  -5   1  10 23515.4 1455.17   6
  -5  -1  10 22047.6 1486.82   6
  -5  -1   9 11626.2 1045.48   6
  -5   1   9 10124.4 956.824   6
  -5   1   9 10322.1 673.456   3
  -5  -1   8 432.201 516.095   6
  -5   1   8 490.710 463.490   6
  -5   1   8 579.414 285.124   3
  -5   1   7 67660.2 1894.34   4
  -5  -1   7 66212.8 2387.38   6
  -5   1   7 71072.7 2354.53   6
  -5   1   7 68400.4 2039.66   3
  -5   1   6 117305. 2588.14   4
  -5   1   6 114887. 3169.81   6
  -5  -1   6 111087. 3233.62   6
  -5   1   5 15628.0 589.613   4
  -5   1   5 15364.1 961.809   6
  -5  -1   5 16200.3 1036.58   6
  -5   1   4 23526.5 591.277   4
  -5  -1   4 24656.1 1234.32   6
  -5   1   4 24203.5 1172.24   6
  -5  -1   3 80260.5 1700.72   4
  -5  -1   3 81437.9 2405.06   6
  -5   1   3 85865.2 2403.16   6
  -5  -1   2 112309. 2224.70   4
  -5  -1   2 115306. 2969.02   6
  -5   1   2 115873. 3056.09   6
   5   1  -1 2696.42 241.673   4
  -5  -1   1 2631.02 484.511   6
  -5   1   1 2468.21 376.388   5
   5   1   0 506737. 8975.23   4
  -5  -1   0 508258. 9631.36   6
  -5  -1   0 492689. 9557.61   5
  -5   1   0 487719. 9341.63   5
   5   1   1 46078.6 1454.02   4
  -5  -1  -1 45308.6 1692.24   5
  -5   1  -1 40497.3 1506.79   5
   5   1   2 19132.5 1027.69   4
  -5   1  -2 19765.0 655.581   7
  -5  -1  -2 18032.9 1064.78   5
  -5   1  -2 19785.2 1019.02   5
  -5  -1  -3 32199.8 1456.26   5
  -5   1  -3 34289.0 1429.56   5
  -5  -1  -4 86883.9 1762.48   7
  -5  -1  -4 86628.5 2674.17   5
  -5   1  -4 82668.4 2579.99   5
  -5  -1  -5 5639.54 773.458   5
  -5   1  -5 4620.94 619.165   5
  -5  -1  -6 208095. 5159.66   5
  -5   1  -6 208549. 5130.57   5
  -5   1  -7 38888.3 1860.50   1
  -5   1  -7 38978.6 1571.30   3
  -5  -1  -7 39947.1 1900.39   5
  -5   1  -7 35914.3 1802.66   5
  -5  -1  -8 828.760 510.071   5
  -5   1  -8 851.855 578.302   1
  -5   1  -8 923.765 358.951   3
  -5  -1  -9 42.0410 504.016   1
  -5   1  -9 1011.58 609.604   1
  -5   1  -9 925.576 332.888   3
  -5   1 -10 42619.5 2225.25   1
  -5  -1 -10 43018.0 2183.67   1
  -5  -1 -11 8410.97 1077.62   1
  -5   1 -11 9025.33 1124.28   1
  -5   1 -12 13739.9 1407.24   1
  -5  -1 -12 12915.2 1345.10   1
  -5  -1 -13 8948.39 1207.47   1
  -5   1 -13 8927.92 1213.21   1
  -5   1 -14 14157.0 1565.48   1
  -5  -1 -14 12217.5 1406.12   1
  -5  -1 -15 791.600 702.254   1
  -5   1 -15-1075.46 678.267   1
  -5   1 -16 9059.58 1465.96   1
   5  -1  16 9048.35 1377.38   6
   5   1  16 7521.11 1181.81   6
  -5  -1 -16 6560.17 1238.38   1
  -5  -1 -17 5647.88 1239.01   1
   5  -1  17 6126.34 1237.85   6
  -5  -2  16 1704.48 729.902   6
  -5   2  16 2518.10 841.368   7
  -5   2  15 26138.2 2070.41   7
  -5  -2  15 25881.4 2037.01   6
  -5   2  15 25422.5 1795.57   6
  -5   2  14 729.668 518.739   6
  -5  -2  14 487.969 620.685   6
  -5  -2  13 3231.25 868.586   6
  -5   2  13 1243.06 592.552   6
  -5   2  12 407.659 356.322   4
  -5  -2  12 1171.11 684.786   6
  -5   2  12 324.705 486.988   6
  -5   2  11 71132.4 2671.16   6
  -5   2  11 66333.4 2385.67   4
  -5  -2  11 66736.7 2819.67   6
  -5   2  10-44.2057 405.994   6
  -5   2  10-77.0675 264.055   4
  -5  -2  10 858.829 534.323   6
  -5   2   9 43437.3 1647.41   4
  -5  -2   9 44245.0 2069.49   6
  -5   2   9 45620.4 1914.67   6
  -5   2   9 44390.5 1559.60   3
  -5   2   8 9073.64 667.723   4
  -5   2   8 10058.5 883.894   6
  -5   2   8 8303.40 643.717   3
  -5  -2   8 7658.94 912.245   6
  -5   2   7 10648.4 882.256   6
  -5  -2   7 11065.8 1047.58   6
  -5   2   7 10161.9 630.253   4
  -5   2   7 9799.38 726.096   3
  -5   2   6 2055.45 289.649   4
  -5  -2   6 1493.77 560.467   6
  -5   2   6 1949.06 473.463   6
  -5   2   6 2528.40 420.477   3
  -5   2   5 217042. 4151.88   4
  -5   2   5 221582. 4860.60   6
  -5   2   5 212467. 4738.92   3
  -5  -2   5 209099. 5035.62   6
  -5   2   4 66779.3 1493.42   4
  -5   2   4 68479.8 2143.61   6
  -5   2   4 65296.2 2061.30   3
  -5  -2   4 65095.6 2216.98   6
  -5  -2   3 103768. 2903.87   6
  -5   2   3 106135. 2910.87   6
  -5   2   3 106666. 2839.57   3
   5  -2  -2 75817.4 1594.33   4
  -5  -2   2 69159.9 2200.84   6
  -5   2   2 75760.8 2301.83   6
  -5   2   2 69248.6 2188.54   3
  -5   2   1 43916.8 1540.64   7
   5  -2  -1 39651.5 1065.94   4
  -5  -2   1 44012.1 1599.14   6
  -5   2   1 45341.4 1647.22   3
  -5   2   1 46343.4 1435.74   5
   5   2  -1 41815.4 1316.68   4
   5   2   0 13186.5 724.561   4
  -5   2   0 15972.5 810.756   7
  -5  -2   0 15079.9 953.470   6
  -5   2   0 14213.4 900.579   3
  -5   2   0 15062.8 781.891   5
   5   2   1 89811.1 2443.09   4
  -5   2  -1 89072.6 2194.37   7
  -5   2  -1 91182.6 2605.74   3
  -5  -2  -1 94707.3 2755.08   5
  -5   2  -1 91266.7 2395.44   5
   5   2   2 184573. 4233.86   4
  -5   2  -2 182325. 3562.79   7
  -5   2  -2 178707. 4216.34   3
  -5   2  -2 173985. 4012.65   5
  -5   2  -3 8802.15 747.030   3
  -5   2  -3 9580.46 748.786   5
  -5  -2  -3 8933.45 791.628   5
   5   2   4 46758.2 1965.39   4
  -5   2  -4 44532.2 1700.05   3
  -5  -2  -4 47718.3 1897.96   5
  -5   2  -4 43309.7 1730.22   5
   5   2   5 82891.1 2913.86   4
  -5   2  -5 84400.3 2529.81   3
  -5  -2  -5 88838.3 2825.30   5
  -5   2  -5 81028.3 2646.07   5
  -5  -2  -6 3985.62 694.134   5
   5   2   6 2638.32 697.246   4
  -5   2  -6 3045.70 647.585   1
  -5   2  -6 3315.51 487.561   3
  -5  -2  -7 470.331 530.332   5
  -5   2  -7 26.7598 470.496   1
  -5   2  -7 317.500 353.516   3
  -5   2  -8 20682.4 1125.45   3
  -5   2  -8 21822.1 1446.73   1
  -5  -2  -8 20705.9 1447.00   5
  -5  -2  -9 61320.8 2588.09   1
  -5   2  -9 63627.2 2104.66   3
  -5   2  -9 62891.8 2681.17   1
  -5  -2  -9 64247.4 2696.20   5
  -5  -2 -10 9750.51 1094.11   1
  -5   2 -10 8864.16 1096.01   1
  -5  -2 -11 42313.5 2260.47   1
  -5   2 -11 44105.0 2396.64   1
  -5   2 -12-128.589 582.834   1
  -5  -2 -12 724.329 598.777   1
  -5  -2 -13 2592.00 773.007   1
  -5   2 -13 3405.04 949.208   1
   5   2  14 2630.76 1058.89   4
  -5  -2 -14 1173.24 620.874   1
  -5   2 -14 2340.44 864.763   1
  -5   2 -15 25747.8 2219.92   1
   5   2  15 31288.2 2595.16   4
  -5  -2 -15 29086.1 2202.71   1
  -5   2 -16 1954.10 870.624   1
   5   2  16 1366.08 940.626   4
   5  -2  16 996.874 748.978   6
  -5  -2 -16 1086.64 773.281   1
  -5  -2 -17 4150.26 1034.43   1
  -5  -3  16 2739.07 1021.08   6
  -5   3  16 423.107 525.628   7
  -5   3  15 7721.31 1186.84   7
  -5  -3  15 6920.36 1195.87   6
  -5   3  14 1528.70 661.957   7
  -5  -3  14 1049.60 713.560   6
  -5   3  13 11708.7 1336.74   7
  -5   3  13 12745.2 1152.15   6
  -5  -3  13 13564.1 1447.89   6
  -5   3  12 667.283 570.963   7
  -5  -3  12 1680.22 672.845   6
  -5   3  12 641.856 398.219   6
  -5   3  11 9470.04 840.186   4
  -5   3  11 9635.34 1171.02   7
  -5   3  11 8884.70 892.956   6
  -5  -3  11 9278.60 1143.75   6
  -5   3  10 9159.56 786.479   4
  -5   3  10 10193.6 896.570   6
  -5  -3  10 8620.64 1094.15   6
  -5   3  10 10622.2 1161.53   7
  -5   3   9 65066.5 2154.10   4
  -5   3   9 65449.8 2321.75   6
  -5  -3   9 64177.6 2632.12   6
  -5   3   9 63167.5 2053.50   3
  -5   3   9 65983.7 2777.62   7
  -5   3   8 5616.65 569.985   3
  -5   3   8 5463.98 550.287   4
  -5   3   8 5070.54 825.908   7
  -5  -3   8 5622.80 862.728   6
  -5   3   8 5197.98 617.548   6
  -5   3   7 68146.0 2675.86   7
  -5   3   7 67305.3 1981.21   4
  -5  -3   7 61691.5 2425.33   6
  -5   3   7 66931.7 2202.68   6
  -5   3   7 67787.6 2154.40   3
  -5   3   6 4031.33 415.375   4
  -5   3   6 3801.37 683.561   7
  -5  -3   6 4495.60 714.815   6
  -5   3   6 5267.26 602.137   3
  -5   3   5 5079.78 420.670   4
  -5   3   5 6131.55 777.240   7
  -5  -3   5 5342.03 749.713   6
  -5   3   5 5357.45 626.334   6
  -5   3   5 5288.15 590.333   3
  -5   3   4 24403.1 1373.82   7
  -5   3   4 24981.7 895.028   4
  -5  -3   4 26033.8 1340.36   6
  -5   3   4 27472.3 1324.91   6
  -5   3   4 24841.0 1216.64   3
  -5   3   3 160547. 3823.18   6
  -5   3   3 148871. 3741.38   3
  -5  -3   3 153429. 3835.21   6
  -5   3   3 152506. 3931.22   7
  -5   3   2 271.000 313.411   7
  -5  -3   2 127.092 339.909   6
  -5   3   2 387.897 355.288   3
  -5   3   2 255.210 215.975   5
  -5   3   1 87314.5 2456.61   7
   5   3  -1 78199.8 2250.58   4
  -5  -3   1 82630.6 2407.92   6
  -5   3   1 81720.0 2452.22   3
  -5   3   1 82171.5 2037.38   5
   5   3   0 19203.6 1024.37   4
  -5   3   0 20812.9 1008.52   7
  -5  -3   0 19125.7 1073.98   6
  -5   3   0 20600.6 1124.46   3
  -5   3   0 21446.2 883.093   5
   5   3   1 105406. 2878.99   4
  -5   3  -1 104298. 2595.48   7
  -5  -3  -1 108011. 2915.09   6
  -5   3  -1 103741. 2915.46   3
  -5  -3  -1 108171. 3100.50   5
  -5   3  -1 102954. 2578.40   5
  -5   3  -2 589.576 289.762   5
   5   3   2 879.358 353.997   4
  -5   3  -2 881.760 248.262   7
  -5   3  -2 1188.27 438.216   3
  -5  -3  -2 851.729 481.498   5
   5   3   3 197982. 4765.12   4
  -5   3  -3 183386. 4441.94   3
  -5  -3  -3 185831. 4622.42   5
  -5   3  -3 183235. 4302.93   5
  -5  -3  -4 8187.83 845.456   5
  -5   3  -4 7015.33 691.837   5
   5   3   4 7821.19 895.285   4
  -5   3  -4 6782.12 700.703   3
  -5   3  -5 7772.49 822.888   1
  -5   3  -5 8821.13 783.653   3
   5   3   5 9902.49 993.442   4
  -5  -3  -5 10710.2 955.681   5
  -5  -3  -6 521.945 508.330   5
   5   3   6 1427.00 545.826   4
  -5   3  -6 628.072 502.644   1
  -5   3  -6 900.510 410.731   3
   5   3   7 197615. 5515.55   4
  -5   3  -7 189621. 4601.53   3
  -5   3  -7 188639. 5074.97   1
  -5  -3  -7 197065. 5120.97   5
  -5   3  -8 339.571 317.262   3
  -5  -3  -8-883.749 577.957   5
   5   3   8 294.430 570.167   4
  -5   3  -8-479.522 535.491   1
   5   3   9 85694.2 3514.40   4
  -5   3  -9 76889.1 2501.02   3
  -5   3  -9 79329.9 3146.57   1
  -5  -3  -9 84392.0 3156.31   5
  -5   3 -10 2742.55 789.198   1
  -5  -3 -10 2420.83 734.603   5
   5   3  10 2626.37 932.656   4
  -5  -3 -10 2177.21 655.669   1
   5   3  11 30889.3 2236.16   4
  -5  -3 -11 30067.8 1858.62   1
  -5   3 -11 30897.4 2059.93   1
   5   3  12 539.504 753.912   4
  -5   3 -12-656.572 672.543   1
  -5  -3 -12 751.480 570.875   1
   5   3  13 50193.8 3053.68   4
  -5  -3 -13 45690.9 2531.50   1
  -5   3 -13 49229.2 2832.53   1
  -5  -3 -14 240.801 535.132   1
   5   3  14 828.281 941.579   4
  -5   3 -14 897.333 670.466   1
  -5   3 -15 10098.2 1460.22   1
   5   3  15 9562.47 1485.19   4
  -5  -3 -15 8049.45 1239.18   1
   5   3  16 903.148 700.615   4
  -5   3 -16 1446.50 794.695   1
   5  -3  16 1269.56 847.511   6
  -5  -3 -16-15.8713 535.755   1
  -5  -3 -17 7622.64 1261.16   1
  -5   4  16 3109.09 864.240   7
  -5   4  15 5906.40 1074.77   7
  -5  -4  15 6027.33 1148.63   6
  -5   4  14 1035.11 634.001   7
  -5  -4  14 2370.82 908.577   6
  -5  -4  13 1041.43 661.878   6
  -5   4  13 479.098 512.286   7
  -5   4  12 3278.49 847.572   7
  -5  -4  12 3503.33 871.776   6
  -5   4  11 22041.4 1329.19   4
  -5   4  11 23853.2 1754.53   7
  -5  -4  11 25059.1 1768.48   6
  -5   4  10 1061.67 371.474   6
  -5   4  10 312.628 332.620   4
  -5  -4  10 1520.31 715.316   6
  -5   4  10 1.84758 436.696   7
  -5   4   9 47776.6 1886.76   4
  -5  -4   9 52991.4 2399.64   6
  -5   4   9 48966.9 1900.81   6
  -5   4   9 49863.0 1876.78   3
  -5   4   9 51338.0 2476.57   7
  -5   4   8 47116.9 1754.30   4
  -5   4   8 47425.0 2286.06   7
  -5  -4   8 44102.4 2123.68   6
  -5   4   8 46777.5 1800.93   6
  -5   4   8 47621.6 1842.79   3
  -5   4   7 7596.28 734.206   3
  -5   4   7 7070.26 617.305   4
  -5   4   7 7640.69 929.989   7
  -5   4   7 7458.98 703.100   6
  -5  -4   7 7305.39 942.346   6
  -5   4   6 563.058 391.473   3
  -5   4   6 609.874 531.953   7
  -5   4   6 267.648 252.873   4
  -5  -4   6-178.917 524.004   6
  -5   4   6 720.657 380.533   6
  -5   4   5 90614.9 2378.67   4
  -5   4   5 89135.6 3052.53   7
  -5  -4   5 90764.6 2899.56   6
  -5   4   5 96747.7 2723.66   6
  -5   4   5 86987.7 2690.52   3
  -5   4   4 66069.6 1885.86   4
  -5  -4   4 72648.0 2417.61   6
  -5   4   4 69522.4 2288.36   3
  -5   4   4 67911.9 2509.68   7
  -5   4   3 59746.5 2222.75   7
  -5  -4   3 58055.0 2062.99   6
  -5   4   3 58410.7 2058.95   3
  -5   4   3 53538.9 1386.57   5
  -5  -4   2 48445.2 1792.07   6
  -5   4   2 48038.8 1836.29   3
  -5   4   2 44824.4 1210.45   5
  -5   4   2 51313.3 1932.19   7
  -5  -4   1 20761.2 1122.05   6
  -5   4   1 23672.8 1259.43   3
  -5   4   1 23721.7 1210.92   7
  -5   4   1 20880.9 765.276   5
  -5   4   0 13166.8 881.804   7
  -5  -4   0 11992.1 861.433   6
  -5   4   0 12019.7 907.601   3
   5   4   0 13468.4 959.903   4
  -5   4   0 12579.2 628.015   5
   5   4   1 78808.1 2613.99   4
  -5   4  -1 83145.8 2376.95   7
  -5  -4  -1 87569.0 2554.63   6
  -5   4  -1 82195.1 2589.38   3
  -5  -4  -1 84200.8 2726.21   5
  -5   4  -1 81802.3 2138.91   5
   5   4   2 178935. 4555.33   4
  -5   4  -2 173782. 4411.08   3
  -5  -4  -2 184897. 4578.31   5
   5   4   3 8051.96 884.324   4
  -5   4  -3 10426.7 845.985   1
  -5   4  -3 10445.2 891.170   3
  -5  -4  -3 10618.4 947.009   5
   5   4   4 91900.2 3141.44   4
  -5   4  -4 90015.7 2786.50   1
  -5   4  -4 82922.1 2723.89   3
  -5  -4  -4 90872.7 2914.71   5
  -5   4  -5 49392.7 2070.05   1
   5   4   5 53895.8 2415.33   4
  -5   4  -5 50169.8 2013.73   3
  -5  -4  -5 51886.3 2155.99   5
   5   4   6 19418.9 1525.51   4
  -5   4  -6 17850.5 1175.87   3
  -5   4  -6 16813.8 1243.88   1
  -5  -4  -6 18935.6 1339.61   5
  -5   4  -7 347.144 401.259   3
  -5  -4  -7 1530.16 544.875   5
   5   4   7 1180.47 670.837   4
  -5   4  -7 1264.05 616.613   1
   5   4   8 110357. 4009.70   4
  -5   4  -8 101341. 3144.46   3
  -5   4  -8 102540. 3591.67   1
  -5  -4  -8 108082. 3566.09   5
   5   4   9 59675.5 2933.90   4
  -5   4  -9 52312.7 2083.91   3
  -5   4  -9 52334.4 2553.89   1
  -5  -4  -9 55750.2 2525.25   5
  -5  -4 -10 3341.32 797.219   5
  -5   4 -10 3372.93 838.182   1
   5   4  10 4064.12 950.190   4
  -5  -4 -10 3980.79 767.255   1
   5   4  11 24615.9 1984.25   4
  -5  -4 -11 19323.6 1458.98   1
  -5   4 -11 20460.0 1726.67   1
   5   4  12 16663.2 1726.94   4
  -5  -4 -12 19411.0 1521.72   1
  -5   4 -12 17830.8 1693.07   1
   5   4  13 1948.65 853.471   4
  -5   4 -13 3420.01 1055.10   1
  -5  -4 -13 3339.92 852.439   1
  -5   4 -14 17831.0 1865.03   1
   5   4  14 17376.3 1879.30   4
  -5  -4 -14 17382.0 1617.40   1
   5   4  15 15361.5 1832.38   4
  -5  -4 -15 12567.7 1438.68   1
  -5   4 -15 12782.9 1620.98   1
  -5  -4 -16 1674.62 724.420   1
  -5   5  15-130.335 564.467   7
  -5  -5  15 638.567 543.956   6
  -5   5  14 8323.69 1228.75   7
  -5  -5  14 7127.05 1204.56   6
  -5   5  13 5456.36 1037.52   7
  -5  -5  13 4065.00 912.094   6
  -5   5  12 4169.10 890.265   7
  -5  -5  12 4327.84 979.386   6
  -5   5  11 2885.35 752.358   7
  -5   5  11 3172.84 577.271   4
  -5  -5  11 2528.06 691.477   6
  -5   5  10 21371.9 1667.96   7
  -5   5  10 22429.4 1334.74   4
  -5  -5  10 21468.2 1630.10   6
  -5   5   9 198.587 327.046   3
  -5   5   9 336.415 481.033   7
  -5   5   9 759.031 368.234   4
  -5  -5   9 643.044 624.097   6
  -5   5   8 5807.04 886.688   7
  -5   5   8 5888.42 701.859   3
  -5   5   8 5034.15 603.437   4
  -5  -5   8 5347.90 907.552   6
  -5   5   8 5029.85 617.853   6
  -5   5   7 8714.00 757.418   4
  -5   5   7 8273.28 1003.71   7
  -5  -5   7 7824.44 938.459   6
  -5   5   7 8184.94 833.611   3
  -5   5   7 8443.08 749.577   6
  -5   5   6 73266.3 2896.06   7
  -5  -5   6 69598.7 2625.05   6
  -5   5   6 72779.6 2519.19   3
  -5   5   6 71380.5 2268.53   4
  -5   5   5 34252.7 1424.31   4
  -5   5   5 37009.4 1914.89   7
  -5  -5   5 34968.4 1725.85   6
  -5   5   5 35892.8 1673.29   3
  -5  -5   4 21974.2 1319.93   6
  -5   5   4 21824.3 1430.93   7
  -5   5   4 23204.3 1325.04   3
  -5   5   3 2414.55 582.580   3
  -5   5   3 2298.18 589.278   7
  -5  -5   3 3668.67 596.450   6
  -5  -5   2 58226.8 2063.04   6
  -5   5   2 57837.6 2254.23   7
  -5   5   2 57892.5 2215.66   3
  -5   5   1 906.147 496.044   3
  -5   5   1-91.1545 347.383   7
  -5  -5   1 367.937 406.692   6
   5   5   0 250311. 5961.36   4
  -5   5   0 256685. 5763.23   7
  -5  -5   0 255365. 5561.18   6
  -5   5   0 256915. 5936.03   3
  -5   5  -1 2074.96 611.170   3
  -5   5  -1 1257.21 347.273   1
  -5   5  -1 2091.03 429.855   7
   5   5   1 2633.08 597.983   4
  -5  -5  -1 1434.98 445.485   6
  -5  -5  -1 2552.83 611.845   5
  -5   5  -2 9061.12 923.186   3
   5   5   2 7039.22 849.251   4
  -5   5  -2 7493.42 696.854   1
  -5  -5  -2 8774.99 893.517   5
   5   5   3 9285.83 996.455   4
  -5   5  -3 11336.6 1006.21   3
  -5   5  -3 10362.7 852.648   1
  -5  -5  -3 10493.7 949.970   5
   5   5   4 146935. 4360.46   4
  -5   5  -4 134349. 3756.83   1
  -5   5  -4 135686. 3932.97   3
  -5  -5  -4 141939. 3930.15   5
  -5  -5  -5 1932.15 642.614   5
  -5   5  -5 1607.49 554.203   3
   5   5   5 3220.19 771.558   4
  -5   5  -5 2615.10 587.884   1
  -5   5  -6 117134. 3577.25   3
   5   5   6 121071. 4166.40   4
  -5   5  -6 112930. 3643.82   1
  -5  -5  -6 125874. 3733.50   5
  -5  -5  -7 1629.28 557.888   5
  -5   5  -7 1529.52 556.274   3
  -5   5  -7 1419.29 567.743   1
   5   5   7 975.489 650.459   4
  -5  -5  -8-378.887 413.559   5
  -5   5  -8-26.0702 351.532   3
  -5   5  -8-400.198 529.613   1
   5   5   8 172.833 645.341   4
  -5  -5  -9-88.8759 472.046   5
  -5   5  -9 97.9855 352.324   3
   5   5   9-147.299 576.987   4
  -5   5  -9 108.399 595.386   1
   5   5  10 36669.3 2418.47   4
  -5  -5 -10 33520.4 1854.64   1
  -5  -5 -10 32660.6 2030.73   5
  -5   5 -10 35449.2 2222.78   1
   5   5  11 7138.96 1174.55   4
  -5  -5 -11 6121.45 853.764   1
  -5   5 -11 7630.27 1195.99   1
  -5   5 -12 13378.4 1560.19   1
   5   5  12 16125.9 1771.79   4
  -5  -5 -12 13745.0 1309.91   1
  -5   5 -13 3347.51 948.780   1
  -5  -5 -13 2578.07 723.799   1
  -5  -5 -14 5192.71 889.057   1
  -5   5 -14 7357.28 1305.79   1
   5   5  15 1322.20 911.285   4
   5  -5  15 1684.59 836.054   6
  -5   5 -15 103.266 766.429   1
  -5  -6  14 10101.8 1446.26   6
  -5   6  14 8480.51 1234.05   7
  -5   6  13 515.501 682.517   7
  -5  -6  13 1363.14 793.039   6
  -5   6  12 34478.6 2306.86   7
  -5  -6  12 35868.0 2312.26   6
  -5   6  11 2070.83 618.192   7
  -5  -6  11 2888.89 908.610   6
  -5   6  10 433.426 423.934   7
  -5   6  10 236.687 311.795   4
  -5   6   9-114.188 370.007   3
   5   6  -9 947.184 611.988   2
  -5   6   9 214.365 285.558   4
  -5  -6   9 152.496 501.762   6
  -5   6   9 905.894 543.705   7
  -5   6   8 38383.2 1768.99   4
  -5   6   8 41071.7 2286.76   7
  -5  -6   8 35607.8 1995.78   6
  -5   6   8 37879.3 1863.27   3
   5   6  -8 41561.3 2073.93   2
  -5   6   7 15521.3 1074.85   4
  -5   6   7 16838.3 1422.51   7
  -5  -6   7 16688.6 1308.61   6
  -5   6   7 16814.0 1219.79   3
  -5   6   6 21275.5 1550.48   7
  -5  -6   6 19084.4 1360.23   6
  -5   6   6 19735.7 1321.94   3
  -5   6   6 19725.7 1189.89   4
  -5  -6   5 4065.45 708.780   6
  -5   6   5 4282.90 710.101   3
  -5   6   5 4828.38 828.142   7
  -5   6   5 4013.99 543.200   4
  -5  -6   4 33802.1 1669.86   6
  -5   6   4 30955.8 1806.85   7
  -5   6   4 31769.2 1685.92   3
  -5   6   3 588.668 448.312   7
  -5   6   3 894.975 525.097   3
  -5  -6   3 623.771 444.389   6
  -5   6   2 70450.0 2645.54   7
  -5  -6   2 67823.6 2303.74   6
  -5   6   2 62795.7 2487.94   3
  -5  -6   1 20472.5 1161.22   6
  -5   6   1 18221.5 1248.25   7
  -5   6   1 18058.0 768.788   1
  -5   6   1 20538.3 1373.11   3
  -5   6   0 321.243 474.324   3
  -5   6   0 1245.44 485.259   7
   5   6   0 257.447 471.861   4
  -5   6   0 581.053 263.006   1
  -5  -6   0 625.076 450.543   6
  -5   6  -1 7291.45 886.522   3
   5   6   1 7190.11 900.904   4
  -5   6  -1 6983.88 607.819   1
  -5  -6  -1 7145.28 709.558   6
  -5  -6  -1 7820.21 879.237   5
  -5   6  -2 49927.2 1807.21   1
  -5  -6  -2 53901.6 2184.10   5
  -5   6  -2 50348.6 2220.03   3
   5   6   2 50861.0 2357.26   4
  -5   6  -3 7826.58 916.764   3
   5   6   3 7503.21 1038.93   4
  -5   6  -3 8435.14 797.403   1
  -5  -6  -3 8292.26 901.014   5
   5   6   4 25491.6 1738.24   4
  -5   6  -4 23661.8 1517.19   3
  -5  -6  -4 23013.2 1420.91   5
  -5   6  -4 24584.9 1370.31   1
  -5  -6  -5 10247.2 965.891   5
  -5   6  -5 9359.98 977.834   3
  -5   6  -5 8956.35 917.328   1
   5   6   5 11193.7 1234.13   4
   5   6   6 5971.22 1022.51   4
  -5  -6  -6 5722.50 817.564   5
  -5   6  -6 5491.15 855.618   1
  -5   6  -6 4889.41 754.797   3
  -5  -6  -7 6260.77 875.728   5
  -5   6  -7 6867.51 871.047   3
   5   6   7 7565.15 1109.44   4
  -5   6  -7 7068.26 950.681   1
   5   6   8 22738.9 1855.75   4
  -5   6  -8 22231.2 1482.86   3
   5   6   8 19184.3 1358.13   2
  -5  -6  -8 21038.2 1491.16   5
  -5   6  -8 21142.9 1606.58   1
  -5  -6  -9 2130.60 635.204   5
  -5   6  -9 2145.51 589.699   3
   5   6   9 1705.79 772.474   4
   5   6   9 2278.48 607.196   2
  -5   6  -9 2210.48 781.943   1
  -5  -6 -10 1719.08 662.616   5
  -5  -6 -10 2141.88 580.817   1
   5   6  10 3142.34 1001.20   4
  -5   6 -10 2677.22 831.672   1
  -5   6 -11 10715.4 1367.82   1
   5   6  11 10938.6 1503.48   4
  -5  -6 -11 11424.9 1114.66   1
  -5   6 -12 18050.1 1802.00   1
   5   6  12 15687.8 1754.61   4
   5   6  13 1151.76 793.016   4
  -5   6 -13 802.643 839.505   1
   5   6  14 5041.11 1303.77   4
   5  -6  14 3447.86 1011.39   6
  -5   6 -14 2439.69 985.475   1
  -5   7  14 7318.96 1237.22   7
  -5   7  13 23949.1 2050.72   7
  -5  -7  13 19852.4 1843.50   6
  -5   7  12-557.984 661.647   7
  -5  -7  12 347.602 538.261   6
  -5   7  11 2123.28 714.412   7
  -5  -7  11 2410.95 785.355   6
  -5   7  10 9394.32 982.970   4
  -5   7  10 7722.05 1138.42   7
  -5  -7  10 10969.5 1311.24   6
  -5   7   9 16088.9 1242.70   4
  -5   7   9 16249.5 1498.90   7
  -5  -7   9 15554.2 1420.84   6
  -5   7   9 15341.7 1261.61   3
   5   7  -9 17672.9 1441.34   2
  -5   7   8 974.031 506.167   3
  -5   7   8-2.09453 454.616   7
   5   7  -8 1033.06 560.241   2
  -5  -7   8 177.402 461.459   6
  -5   7   8 507.171 338.823   4
  -5   7   7 60982.9 2909.70   7
  -5  -7   7 57582.4 2541.48   6
  -5   7   7 59684.1 2539.92   3
   5   7  -7 65198.6 2797.09   2
  -5   7   7 63362.8 2436.34   4
  -5   7   6 8653.75 980.813   3
  -5   7   6 9244.93 870.865   4
  -5   7   6 10903.9 1177.53   7
   5   7  -6 10924.7 1223.20   2
  -5  -7   6 9418.30 1037.68   6
  -5   7   5 7242.99 908.586   3
  -5  -7   5 7395.98 879.640   6
  -5   7   4 6156.37 868.933   3
  -5   7   4 6640.40 949.138   7
  -5  -7   4 5510.53 716.877   6
  -5   7   3 46135.3 2298.92   7
  -5  -7   3 44834.5 1934.33   6
  -5   7   3 48411.1 2239.38   3
  -5  -7   2 7060.66 746.090   6
  -5   7   2 8508.67 960.437   7
  -5   7   1 38294.8 1981.77   7
  -5  -7   1 36216.1 1592.71   6
  -5   7   1 37145.5 1952.61   3
  -5  -7   0 25306.4 1271.06   6
  -5   7   0 23868.3 1602.53   3
  -5   7  -1-55.5398 518.088   3
  -5   7  -1 173.795 228.204   1
   5   7   1 369.688 496.868   4
  -5  -7  -1 384.932 382.245   6
  -5  -7  -1 783.724 521.407   5
  -5   7  -2 550.097 557.547   3
  -5   7  -2-96.9204 288.674   1
   5   7   2 157.860 505.732   4
  -5  -7  -2-92.7424 482.629   5
  -5   7  -3 10548.4 1112.85   3
   5   7   3 13464.4 1335.40   4
  -5  -7  -3 12030.8 1045.00   5
  -5   7  -3 10601.3 859.478   1
  -5   7  -4 11724.3 1149.10   3
   5   7   4 10237.0 1251.22   4
  -5  -7  -4 10732.3 1003.00   5
  -5   7  -4 9845.22 907.714   1
  -5  -7  -5 1524.82 498.085   5
  -5   7  -5 650.715 547.832   3
   5   7   5 956.197 679.299   4
  -5   7  -5 1352.25 503.560   1
  -5   7  -6 20173.4 1430.47   1
   5   7   6 20473.5 1766.40   4
  -5   7  -6 23321.0 1637.63   3
   5   7   6 19340.6 1471.96   2
  -5  -7  -6 19749.8 1382.81   5
  -5   7  -7 13299.7 1236.23   1
   5   7   7 12244.1 1450.83   4
  -5   7  -7 14533.4 1288.29   3
   5   7   7 13247.1 1226.73   2
  -5  -7  -7 12882.2 1144.91   5
  -5   7  -8 255.917 501.112   1
  -5  -7  -8 709.210 552.056   5
  -5   7  -8 1154.39 591.198   3
   5   7   8 1060.78 671.554   4
   5   7   8 1980.05 661.254   2
  -5  -7  -9 943.977 495.256   5
  -5   7  -9 1300.36 738.861   1
  -5   7  -9 562.959 467.789   3
   5   7   9 1452.61 533.499   2
   5   7   9 1108.33 715.321   4
  -5  -7 -10 2314.37 624.564   5
  -5   7 -10 2204.30 836.367   1
   5   7  10 1417.40 769.858   4
   5   7  11 7625.72 1230.29   4
  -5   7 -11 10551.0 1414.39   1
   5   7  12 470.184 642.473   4
  -5   7 -12 1451.19 869.363   1
  -5   7 -13 13648.0 1701.24   1
   5   7  13 13458.6 1788.52   4
  -5   7 -14 1074.59 904.714   1
  -5   8  13 853.847 711.946   7
  -5  -8  13 646.030 730.677   6
  -5   8  12-133.396 647.929   7
  -5  -8  12 385.726 651.884   6
  -5   8  11 25200.8 2106.34   7
  -5  -8  11 25981.8 1952.32   6
  -5  -8  10 1862.90 829.020   6
  -5   8  10-156.695 512.589   7
  -5   8   9 28561.3 1748.54   4
  -5   8   9 28081.6 2112.49   7
  -5  -8   9 25043.5 1808.22   6
   5   8  -9 28542.3 1899.81   2
  -5   8   9 27651.8 1778.78   3
  -5   8   8 249.363 436.923   3
   5   8  -8 484.179 711.439   2
  -5   8   8 866.365 687.240   7
  -5   8   8 802.318 409.193   4
  -5  -8   8 421.134 480.995   6
  -5   8   7 762.775 571.036   3
  -5   8   7 688.426 407.004   4
  -5   8   7 69.6848 565.350   7
   5   8  -7 174.551 547.693   2
  -5  -8   7 1590.25 698.571   6
  -5   8   6 2033.25 678.378   7
  -5   8   6 1443.22 601.067   3
   5   8  -6 2397.85 770.129   2
  -5  -8   6 2695.72 758.311   6
  -5   8   5 64142.2 2997.13   7
  -5  -8   5 61367.8 2503.28   6
  -5   8   5 59532.7 2677.31   3
   5   8  -5 58092.5 2793.18   2
  -5   8   4 1259.29 644.440   3
  -5   8   4 1215.80 645.068   7
   5   8  -4 2460.25 767.090   2
  -5  -8   4 989.037 505.528   6
   5   8  -3 11951.3 1290.72   2
  -5  -8   3 12278.3 1025.67   6
  -5   8   3 11587.4 1184.80   3
  -5   8   3 12753.8 1298.83   7
  -5   8   2 1314.15 582.510   3
  -5  -8   2 1085.46 393.142   6
  -5   8   2 1317.90 592.487   7
   5   8  -2 2669.97 820.046   2
  -5   8   1 11439.0 1197.79   3
   5   8  -1 9660.63 1172.39   2
  -5  -8   1 9934.96 829.648   6
  -5   8   0 405.446 554.315   3
   5   8   0 390.323 701.688   2
  -5  -8   0 1229.77 394.569   6
  -5  -8   0 1168.08 552.883   5
   5   8   1 22500.9 1712.24   4
  -5  -8  -1 23815.5 1233.98   6
  -5   8  -1 26687.0 1802.11   3
  -5  -8  -1 26509.7 1597.03   5
   5   8   1 24115.3 1757.97   2
  -5   8  -2 1873.22 605.633   3
   5   8   2 323.224 607.962   4
   5   8   2 1385.63 701.113   2
  -5  -8  -2 864.115 509.160   5
  -5   8  -3-29.4572 565.858   3
  -5   8  -3 252.360 313.362   1
   5   8   3-671.983 676.589   2
   5   8   3 561.156 615.574   4
  -5  -8  -3 1038.42 562.001   5
  -5   8  -4 765.478 640.588   3
  -5   8  -4 567.825 391.908   1
   5   8   4 360.169 687.692   4
   5   8   4 1866.73 750.631   2
  -5  -8  -4 246.439 488.626   5
  -5   8  -5 39157.9 1913.22   1
   5   8   5 40948.3 2550.06   4
  -5   8  -5 41669.3 2315.16   3
   5   8   5 38483.6 2194.51   2
  -5  -8  -5 41091.9 1997.55   5
  -5  -8  -6-185.381 360.951   5
  -5   8  -6 235.384 570.591   3
   5   8   6-217.475 511.159   2
  -5   8  -6 610.765 432.939   1
   5   8   6-273.721 557.787   4
  -5  -8  -7 74.6705 450.812   5
  -5   8  -7 891.575 575.324   3
   5   8   7 1166.96 554.308   2
   5   8   7 508.184 763.638   4
  -5   8  -7 616.701 532.474   1
  -5  -8  -8 975.694 537.519   5
  -5   8  -8 1308.82 708.839   3
   5   8   8 243.411 515.621   2
   5   8   8-284.225 592.650   4
  -5   8  -8 385.049 471.677   1
  -5   8  -9 29820.4 2036.37   1
   5   8   9 29617.7 2335.48   4
   5   8   9 28338.6 1813.86   2
  -5   8  -9 28647.7 1931.93   3
  -5  -8  -9 29674.7 1861.84   5
  -5  -8 -10 721.303 524.581   5
  -5   8 -10 950.759 791.373   1
   5   8  10-400.855 630.329   4
   5   8  11 14781.3 1754.81   4
  -5   8 -11 15318.4 1639.61   1
   5   8  12-681.619 709.520   4
  -5   8 -12 438.216 706.353   1
   5  -8  13 775.255 826.051   6
  -5   8 -13 1496.58 952.539   1
  -5  -9  12 1605.63 785.537   6
  -5   9  11 1691.94 733.339   7
  -5  -9  11 1273.89 779.555   6
  -5   9  10 8171.99 1333.15   7
  -5  -9  10 7684.77 1087.11   6
   5   9  -9 7889.60 1102.98   2
  -5  -9   9 10162.2 1215.92   6
  -5   9   9 8915.93 1302.67   7
  -5   9   9 11590.4 1249.35   3
  -5  -9   8 1022.45 670.294   6
   5   9  -8 80.4842 539.518   2
  -5   9   8 945.860 650.433   3
  -5   9   8-450.475 662.473   7
  -5   9   8 530.121 427.458   4
  -5   9   7 19819.1 1787.97   7
  -5  -9   7 21330.7 1595.89   6
   5   9  -7 22438.0 1796.86   2
  -5   9   7 21238.2 1671.16   3
   5   9  -6 3506.43 935.265   2
  -5   9   6 2949.95 831.818   7
  -5  -9   6 2748.56 690.382   6
  -5   9   6 4205.01 812.709   3
  -5   9   5 1792.95 698.883   3
  -5   9   5 3062.01 850.629   7
  -5  -9   5 3067.51 677.144   6
   5   9  -5 1228.63 721.026   2
  -5   9   4 9414.04 1151.91   3
   5   9  -4 8095.16 1152.72   2
  -5   9   4 8554.54 1186.23   7
  -5  -9   4 8665.93 895.050   6
  -5   9   3 29467.7 2031.86   7
  -5  -9   3 24741.8 1454.03   6
  -5   9   3 24144.0 1759.28   3
   5   9  -3 26537.5 1928.89   2
  -5   9   2 959.502 604.908   3
   5   9  -2 1201.59 774.680   2
  -5  -9   2 578.759 390.921   6
  -5   9   1 19603.3 1603.52   3
   5   9  -1 16376.4 1539.74   2
  -5   9   0 7353.35 1097.22   3
   5   9   0 5988.60 1066.20   2
  -5  -9   0 7811.51 932.597   5
  -5   9  -1 13008.5 1369.39   3
   5   9   1 11487.9 1295.77   2
  -5  -9  -1 14662.5 1255.96   5
   5   9   2 4742.39 1056.69   4
  -5   9  -2 4619.33 1039.45   3
   5   9   2 4625.41 937.061   2
  -5  -9  -2 4949.34 763.856   5
   5   9   3 26987.5 2079.40   4
  -5   9  -3 28990.8 1997.98   3
   5   9   3 25442.8 1877.81   2
  -5  -9  -3 27510.4 1638.09   5
  -5  -9  -4 1057.83 467.702   5
  -5   9  -4 1030.28 588.075   3
   5   9   4 2074.53 741.453   2
   5   9   4 822.416 682.688   4
  -5  -9  -5 823.498 488.957   5
  -5   9  -5 1061.94 699.671   3
   5   9   5 1133.54 686.429   4
   5   9   5 2332.56 794.184   2
  -5  -9  -6 5452.26 818.617   5
  -5   9  -6 3692.87 700.718   1
  -5   9  -6 5953.17 1106.04   3
   5   9   6 4228.50 863.088   2
   5   9   6 5872.87 1155.23   4
  -5   9  -7 22586.4 1624.48   1
   5   9   7 22259.4 2057.48   4
   5   9   7 22541.6 1747.84   2
  -5   9  -7 25535.4 1940.87   3
  -5  -9  -7 23087.5 1570.95   5
  -5  -9  -8 825.672 501.399   5
   5   9   8-142.525 557.367   2
  -5   9  -8-179.616 577.988   3
   5   9   8 747.309 846.377   4
  -5   9  -8 779.048 550.881   1
  -5   9  -9 5347.03 984.921   1
  -5   9  -9 6782.17 1057.98   3
   5   9   9 7674.94 1409.58   4
  -5   9 -10 1900.75 766.305   1
   5   9  10 1059.73 725.131   4
   5  -9  11 11374.1 1639.51   6
   5   9  11 11230.7 1608.48   4
   5  -9  12 139.151 764.122   6
  -5 -10  11 2381.25 907.320   6
  -5  10  10 940.825 722.981   7
  -5 -10  10 1499.65 700.133   6
   5  10  -9 4335.78 929.688   2
  -5  10   9 4837.46 1089.85   7
  -5 -10   9 3171.45 755.782   6
   5  10  -8 2353.80 853.512   2
  -5  10   8 2246.53 693.257   3
  -5  10   8 4337.40 1000.59   7
  -5 -10   8 4784.83 832.260   6
  -5  10   7 866.384 671.706   3
   5  10  -7 397.403 667.412   2
  -5  10   7 619.646 638.722   7
  -5 -10   7 609.227 576.295   6
   5  10  -6 455.761 641.127   2
  -5  10   6 1324.48 766.302   7
  -5  10   6 1849.33 721.933   3
  -5 -10   6 1017.02 583.505   6
   5  10  -5 3614.58 942.589   2
  -5  10   5 2954.61 943.738   7
  -5 -10   5 1418.31 552.263   6
  -5  10   5 3427.64 899.973   3
  -5 -10   4 15256.9 1235.98   6
   5  10  -4 16010.2 1615.06   2
  -5  10   4 18720.6 1667.42   3
  -5  10   3 1884.17 710.049   3
   5  10  -3 1520.70 717.609   2
  -5  10   2 25442.3 1944.66   3
   5  10  -2 24848.2 1988.92   2
   5  10  -1 4311.13 1064.53   2
  -5  10   1 2953.13 788.633   3
  -5  10   0 9463.20 1294.68   3
   5  10   0 10875.8 1395.52   2
  -5 -10   0 9572.28 1047.22   5
  -5  10  -1 5055.59 1012.71   3
   5  10   1 6504.86 1139.18   2
  -5 -10  -1 5670.28 838.419   5
  -5  10  -2 52676.7 2856.89   3
   5  10   2 53351.4 2868.39   2
  -5 -10  -2 49383.9 2322.84   5
   5  10   3 3039.85 978.921   2
   5  10   3 1504.12 651.979   4
  -5  10  -3 3951.78 1025.48   3
  -5 -10  -3 1761.83 565.004   5
   5  10   4 13457.5 1600.56   4
   5  10   4 14407.1 1525.72   2
  -5 -10  -4 17201.3 1318.09   5
  -5 -10  -5 5550.24 778.411   5
  -5  10  -5 8273.62 1288.37   3
   5  10   5 8747.26 1193.07   2
   5  10   5 7130.11 1299.15   4
   5  10   6 2386.51 821.665   2
  -5  10  -6 4028.62 997.808   3
   5  10   6 3285.59 976.147   4
   5  10   7 1014.80 535.497   2
  -5  10  -7 1688.50 760.577   3
   5  10   7 1087.27 703.434   4
   5  10   8 23009.1 2198.76   4
   5  10   8 21747.5 1768.57   2
  -5  10  -8 22599.5 1917.22   3
  -5  10  -9 5636.48 1058.85   3
   5 -10   9 7597.99 1355.20   6
   5  10   9 9041.24 1463.67   4
   5  10  10 3204.12 1069.05   4
   5 -10  10 3544.80 1005.01   6
   5 -10  11 4658.36 1209.21   6
  -5 -11  10 2385.65 761.571   6
  -5 -11   9 899.061 614.565   6
   5  11  -8 674.928 704.283   2
  -5  11   8 53.6869 637.213   3
  -5  11   8 25.3794 637.569   7
  -5 -11   8-165.919 512.227   6
  -5  11   7 296.055 612.374   3
   5  11  -7 391.593 744.235   2
   5  11  -6 18746.8 1854.75   2
  -5  11   6 16904.6 1713.07   3
   5  11  -5 552.480 647.229   2
  -5  11   5 1646.80 776.606   3
   5  11  -4 2589.52 863.304   2
  -5  11   4 4722.81 1055.02   3
   5  11  -3 1409.27 767.874   2
  -5  11   3 2715.01 870.263   3
   5  11  -2 10390.5 1379.29   2
  -5  11   2 14932.4 1639.54   3
   5  11  -1 207.966 730.521   2
  -5  11   1 1768.43 921.226   3
  -5 -11   1 281.784 525.519   5
   5  11   0 30043.7 2277.25   2
  -5  11   0 28980.9 2207.92   3
  -5 -11   0 29195.4 1864.88   5
   5  11   1 1047.67 796.275   2
  -5  11  -1 2143.96 881.772   3
   5  11   2 3454.45 893.529   2
  -5  11  -2 6024.45 1269.55   3
   5  11   3 325.330 812.188   2
  -5  11  -3 1737.54 928.244   3
   5  11   4 11977.1 1445.56   2
  -5  11  -4 14769.0 1715.25   3
   5  11   4 10418.9 1522.83   4
   5  11   5 353.469 705.884   2
  -5  11  -5 1084.01 920.220   3
   5  11   5 173.125 752.312   4
   5  11   6 16563.8 1968.40   4
   5  11   6 15928.4 1669.12   2
  -5  11  -6 18778.3 1868.09   3
   5  11   7 1141.67 581.375   2
  -5  11  -7-591.991 807.091   3
   5  11   7 1905.63 950.756   4
   5  11   8-205.689 556.809   2
  -5  11  -8 292.327 728.616   3
   5  11   8 177.027 716.752   4
   5 -11   8 1093.58 789.761   6
  -5  11  -9 2851.15 992.402   3
   5 -11   9 3115.96 1117.78   6
   5 -11  10 5682.81 1135.10   6
   5  12  -8 1788.48 744.026   2
  -5  12   8 766.932 651.177   3
   5  12  -7 2498.47 861.247   2
  -5  12   7 2961.94 937.416   3
   5  12  -6 252.058 711.392   2
  -5  12   6 4.62840 720.543   3
   5  12  -5 6449.73 1293.57   2
  -5  12   5 3461.89 983.551   3
  -5  12   4 4771.78 1001.35   3
   5  12  -4 5319.26 1192.99   2
   5  12  -3 760.115 772.798   2
  -5  12   3 548.159 705.315   3
   5  12  -2 3274.93 876.250   2
  -5  12   2 2503.01 967.973   3
   5  12  -1 6593.66 1305.45   2
  -5  12   1 3476.58 956.973   3
   5  12   0 293.480 747.317   2
  -5  12   0-927.789 774.471   3
   5  12   1 4922.92 1074.88   2
  -5  12  -1 3691.31 1010.25   3
   5  12   2 8971.98 1341.51   2
  -5  12  -2 8699.98 1408.42   3
   5  12   3 1648.45 824.359   2
  -5  12  -3 1882.15 1008.13   3
   5  12   4 3468.42 996.945   2
  -5  12  -4 4100.34 1067.74   3
   5  12   5 7505.07 1260.43   2
  -5  12  -5 6536.23 1302.37   3
  -5  12  -6 23.7987 876.051   3
   5  12   6-255.926 546.963   2
   5  12   6 1345.27 852.719   4
   5  12   7 275.810 669.394   2
  -5  12  -7 654.121 626.017   3
   5  12   8 2006.90 854.998   2
  -5  12  -8 2734.79 936.352   3
  -6   0  17 531.000 576.706   6
  -6   0  16 15353.9 1575.81   6
  -6   0  15 1035.78 694.076   6
  -6   0  14 15177.1 1493.79   6
  -6   0  13-68.3228 483.903   6
  -6   0  12 28075.0 1819.93   6
  -6   0  11-47.3062 489.036   6
  -6   0  10 12964.8 1185.76   6
  -6   0   9 320.766 455.796   6
  -6   0   8 2020.34 609.290   6
  -6   0   7-211.912 477.795   6
  -6   0   6 197891. 4879.83   6
  -6   0   5 181.158 86.4819   4
  -6   0   5-327.184 443.965   6
  -6   0   4 74221.5 2418.39   6
  -6   0   3 215.926 460.820   6
  -6   0   2 37577.7 1641.32   6
  -6   0   1-113.685 366.172   6
  -6   0   1-67.6232 303.114   5
   6   0   0 367943. 6701.18   4
  -6   0   0 367783. 7531.31   5
   6   0   1 477.070 286.632   4
  -6   0  -1 197.077 389.458   5
  -6   0  -2 32568.4 1484.07   5
  -6   0  -3 109.132 437.838   5
  -6   0  -4 177777. 4550.19   5
  -6   0  -5-124.800 459.616   5
  -6   0  -6 185533. 4904.08   5
  -6   0  -7-123.604 496.970   5
  -6   0  -8 993.193 625.082   5
  -6   0  -9 568.930 561.127   1
  -6   0 -10 59273.6 2722.28   1
  -6   0 -11 955.048 650.352   1
  -6   0 -12 15288.3 1475.21   1
  -6   0 -13-147.822 581.476   1
  -6   0 -14 18247.7 1762.42   1
  -6   0 -15-62.3589 702.814   1
  -6   0 -16 13510.8 1703.07   1
  -6  -1  16 3926.73 912.696   6
  -6   1  16 5203.40 951.171   6
  -6  -1  15 536.098 656.040   6
  -6   1  15 1811.92 720.403   6
  -6  -1  14 1843.84 770.527   6
  -6   1  14 1587.75 650.358   6
  -6  -1  13 906.097 532.982   6
  -6   1  13 1151.90 535.525   6
  -6  -1  12 11734.8 1261.47   6
  -6   1  12 10175.3 1077.89   6
  -6  -1  11 9456.26 1102.67   6
  -6   1  11 10355.1 1076.18   6
  -6  -1  10 3424.41 765.242   6
  -6   1  10 3208.18 614.563   6
  -6   1   9 8663.26 661.690   4
  -6  -1   9 10335.9 1068.35   6
  -6   1   9 9574.89 724.288   3
  -6   1   9 9110.38 920.837   6
  -6   1   8 45644.5 1484.12   4
  -6   1   8 50104.9 2088.27   6
  -6  -1   8 45880.4 2069.91   6
  -6   1   8 46972.0 1753.57   3
  -6   1   7 4046.48 358.513   4
  -6   1   7 3287.35 518.424   3
  -6  -1   7 3996.54 722.558   6
  -6   1   7 4307.16 711.423   6
  -6   1   6 172.151 119.765   4
  -6  -1   6-496.034 465.112   6
  -6   1   6-49.8410 421.316   6
  -6   1   5 12063.5 960.654   6
  -6  -1   5 11576.4 961.562   6
  -6  -1   4 199560. 3745.31   4
  -6  -1   4 210830. 4895.42   6
  -6   1   4 208066. 4857.19   6
  -6  -1   3 2053.96 165.928   4
  -6  -1   3 1366.50 502.878   6
  -6   1   3 2635.75 561.778   6
  -6  -1   2 156048. 3965.84   6
  -6   1   2 155082. 3998.58   6
  -6  -1   1 119701. 3232.11   6
  -6   1   1 119710. 2961.54   5
   6   1   0 3394.88 343.557   4
  -6  -1   0 3446.58 630.711   6
  -6  -1   0 3625.98 606.539   5
  -6   1   0 3441.63 494.844   5
   6   1   1 62558.0 1810.36   4
  -6  -1  -1 59822.9 2130.30   5
  -6   1  -1 58138.6 1997.02   5
  -6   1  -2 166928. 3360.82   7
  -6  -1  -2 158181. 4154.18   5
  -6   1  -2 166529. 4101.72   5
   6   1   3 84349.2 2613.50   4
  -6   1  -3 83133.7 1663.62   7
  -6  -1  -3 80611.4 2689.93   5
  -6   1  -3 84261.2 2631.10   5
  -6  -1  -4 138662. 3798.78   5
  -6   1  -4 133139. 3651.76   5
  -6  -1  -4 130189. 2548.99   7
  -6  -1  -5 66083.9 2467.63   5
  -6   1  -5 63046.2 2410.42   5
  -6  -1  -6 7354.08 949.803   5
  -6   1  -6 7514.79 927.920   5
  -6  -1  -7 33754.6 1854.97   5
  -6   1  -7 29619.4 1727.06   5
  -6   1  -8 59786.9 2190.29   3
  -6   1  -8 58758.7 2557.89   1
  -6  -1  -8 57057.3 2549.85   5
  -6   1  -9 47904.2 1896.63   3
  -6   1  -9 42476.9 2235.25   1
  -6  -1  -9 45980.2 2324.33   5
  -6  -1 -10 2319.79 729.959   1
  -6   1 -10 3629.60 843.073   1
  -6   1 -11 46194.5 2502.96   1
  -6  -1 -11 44296.9 2371.41   1
  -6  -1 -12 15307.7 1479.11   1
  -6   1 -12 17546.3 1621.35   1
  -6   1 -13 1485.74 770.080   1
  -6  -1 -13 199.886 622.744   1
  -6  -1 -14 5773.85 1108.56   1
  -6   1 -14 4197.53 1007.22   1
  -6  -1 -15 5308.31 1075.14   1
  -6   1 -15 6014.74 1183.06   1
  -6  -1 -16 6580.74 1219.86   1
  -6   1 -16 6004.16 1166.78   1
  -6   2  16 3556.98 933.429   7
  -6  -2  16 5150.87 1031.37   6
  -6  -2  15 205.709 644.384   6
  -6   2  15 2461.07 847.319   7
  -6  -2  14 3280.17 834.680   6
  -6   2  14 1952.70 664.952   6
  -6  -2  13 25047.7 1860.62   6
  -6   2  13 26886.5 1732.66   6
  -6  -2  12 3052.42 793.926   6
  -6   2  12 2587.25 576.962   6
  -6  -2  11 29305.0 1869.89   6
  -6   2  11 32393.7 1777.29   6
  -6  -2  10 26650.3 1693.28   6
  -6   2  10 27946.7 1594.31   6
  -6  -2   9 29591.7 1727.63   6
  -6   2   9 28271.3 1569.65   6
  -6   2   9 29745.6 1327.19   3
  -6  -2   8 4147.25 761.359   6
  -6   2   8 2396.18 537.578   6
  -6   2   8 2674.85 349.597   4
  -6   2   8 4207.41 519.026   3
  -6   2   7 101974. 2355.84   4
  -6  -2   7 96259.3 3182.70   6
  -6   2   7 98381.8 3033.37   6
  -6   2   7 96163.2 2800.17   3
  -6   2   6 4384.51 329.890   4
  -6  -2   6 4432.26 738.189   6
  -6   2   6 4506.00 673.555   6
  -6   2   6 4606.29 597.127   3
  -6   2   5 8907.20 385.858   4
  -6   2   5 10393.6 888.270   6
  -6   2   5 9518.93 809.871   3
  -6  -2   5 10476.5 955.972   6
  -6  -2   4 27888.2 1457.54   6
  -6   2   4 29288.1 1444.62   6
  -6   2   4 32286.7 1450.11   3
  -6  -2   3 98054.9 2887.25   6
  -6   2   3 97739.0 2907.89   6
  -6   2   3 91415.6 2790.15   3
  -6  -2   2 25662.7 1320.92   6
  -6   2   2 23029.4 1056.36   5
   6  -2  -1 30518.4 846.856   4
   6   2  -1 32943.9 1141.00   4
  -6  -2   1 30695.0 1489.93   6
  -6   2   1 34304.6 1308.74   5
   6   2   0 37980.1 1324.83   4
  -6   2   0 36166.0 1362.92   7
  -6  -2   0 37911.6 1651.79   6
  -6  -2   0 36186.3 1628.84   5
  -6   2   0 33381.5 1374.71   5
   6   2   1 79545.9 2257.48   4
  -6   2  -1 72707.4 2007.05   7
  -6  -2  -1 78262.1 2580.25   5
  -6   2  -1 72801.6 2236.48   5
  -6   2  -2 6961.84 459.191   7
   6   2   2 8294.73 716.818   4
  -6   2  -2 7578.88 700.739   5
  -6  -2  -2 7367.84 778.423   5
   6   2   3 174238. 4328.40   4
  -6   2  -3 173694. 4334.12   3
  -6  -2  -3 158837. 4338.37   5
  -6   2  -3 172783. 4216.60   5
  -6  -2  -4 214.286 456.135   5
  -6   2  -4 226.548 431.154   5
  -6   2  -4 603.900 381.903   3
   6   2   4 237.150 400.911   4
  -6  -2  -5 1182.95 506.744   5
  -6   2  -5 2095.31 561.625   5
   6   2   5 2493.92 705.222   4
  -6   2  -5 1386.42 484.539   3
   6   2   6 17465.5 1411.70   4
  -6   2  -6 18217.6 1157.48   3
  -6  -2  -6 18087.4 1346.94   5
  -6   2  -6 17289.7 1261.31   5
   6   2   7 143244. 4495.47   4
  -6   2  -7 138699. 4224.26   1
  -6   2  -7 143243. 3865.86   3
  -6  -2  -7 153331. 4415.67   5
  -6  -2  -8 2208.58 661.496   5
   6   2   8 3198.36 844.291   4
  -6   2  -8 3458.31 825.891   1
  -6   2  -8 3102.77 519.788   3
  -6   2  -9 44912.6 1854.07   3
  -6   2  -9 44746.8 2315.99   1
  -6  -2  -9 43951.4 2310.05   5
  -6  -2 -10 2126.35 788.410   5
  -6  -2 -10 2691.11 680.388   1
  -6   2 -10 1631.61 710.683   1
  -6  -2 -11 19213.8 1566.64   1
  -6   2 -11 23483.7 1776.92   1
  -6   2 -12-181.323 538.500   1
  -6  -2 -12-13.5451 527.986   1
   6   2  13 32528.4 2467.84   4
  -6  -2 -13 32995.7 2190.45   1
  -6   2 -13 31236.1 2268.44   1
  -6  -2 -14 4760.51 1046.50   1
   6   2  14 5308.65 1174.93   4
  -6   2 -14 4296.90 1040.36   1
  -6  -2 -15 11253.4 1444.46   1
   6   2  15 10492.0 1616.31   4
  -6   2 -15 10098.8 1516.90   1
  -6  -2 -16-999.331 813.513   1
  -6   3  15 26504.6 2161.34   7
  -6  -3  15 25008.1 2066.58   6
  -6   3  14 3265.90 946.878   7
  -6  -3  14 2518.73 828.289   6
  -6   3  13 832.207 532.670   7
  -6  -3  13 1522.71 769.642   6
  -6   3  12 1586.22 622.402   7
  -6  -3  12 1440.04 708.323   6
  -6   3  12-92.3431 407.588   6
  -6   3  11 40375.1 2395.84   7
  -6  -3  11 37852.4 2197.96   6
  -6   3  11 42117.1 1999.64   6
  -6   3  10 1791.31 655.117   7
  -6  -3  10 2324.83 776.083   6
  -6   3  10 1250.32 464.436   6
  -6  -3   9 89671.7 3267.31   6
  -6   3   9 92980.9 3008.13   6
  -6   3   9 90094.7 2707.53   3
  -6   3   8 9397.14 653.569   4
  -6   3   8 10110.5 889.114   6
  -6   3   8 9016.76 775.110   3
  -6  -3   8 9863.49 1063.94   6
  -6   3   7 840.719 231.928   4
  -6  -3   7 1493.99 643.415   6
  -6   3   7 1113.15 448.874   6
  -6   3   7 970.202 348.109   3
  -6   3   6 1964.56 277.023   4
  -6  -3   6 1435.04 646.297   6
  -6   3   6 2204.56 554.467   6
  -6   3   6 2304.91 506.770   3
  -6   3   5 118380. 3661.82   7
  -6   3   5 120132. 2602.93   4
  -6  -3   5 120215. 3542.20   6
  -6   3   5 124523. 3448.77   6
  -6   3   5 120860. 3333.49   3
  -6   3   4 4814.54 673.135   7
  -6  -3   4 4722.53 722.124   6
  -6   3   4 4136.39 639.783   6
  -6   3   4 4794.54 658.186   3
  -6   3   3 22425.9 1292.58   7
  -6  -3   3 22702.8 1289.11   6
  -6   3   3 21963.1 1211.11   3
  -6   3   3 22207.7 986.056   5
  -6   3   2 2155.99 483.700   7
  -6  -3   2 1233.07 471.792   6
  -6   3   2 1613.08 503.989   3
  -6   3   1 73220.3 2293.16   7
   6   3  -1 69988.2 2091.95   4
  -6  -3   1 76575.8 2426.23   6
  -6   3   1 71558.9 2390.00   3
  -6   3   0 4778.51 491.062   5
  -6   3   0 4893.99 553.592   7
   6   3   0 4773.29 534.175   4
  -6  -3   0 3450.71 597.709   6
  -6  -3   0 4059.08 651.556   5
  -6   3   0 5408.54 693.481   3
   6   3   1 59598.4 2038.53   4
  -6   3  -1 59238.7 1821.48   7
  -6   3  -1 55632.2 2099.55   3
  -6  -3  -1 59118.9 2264.72   5
  -6   3  -1 57204.7 1868.29   5
  -6   3  -2 594.495 336.883   5
   6   3   2 171.983 359.838   4
  -6   3  -2 420.533 192.182   7
  -6   3  -2 326.177 372.354   3
  -6  -3  -2 755.717 562.489   5
   6   3   3 19940.0 1247.24   4
  -6   3  -3 20154.7 1247.98   3
  -6  -3  -3 17114.4 1215.32   5
  -6   3  -3 18959.7 1106.22   5
  -6  -3  -4 489.491 511.151   5
  -6   3  -4 599.894 367.554   5
   6   3   4 498.812 532.361   4
  -6   3  -4 578.390 485.739   3
   6   3   5 147410. 4331.86   4
  -6   3  -5 139771. 3919.41   3
  -6   3  -5 141956. 3955.01   5
  -6  -3  -6 11057.9 1097.26   5
   6   3   6 10558.1 1150.87   4
  -6   3  -6 8431.68 991.048   1
  -6   3  -6 11136.1 939.764   3
  -6  -3  -7 199.952 515.115   5
   6   3   7 2071.63 646.495   4
  -6   3  -7 1288.22 576.594   1
  -6   3  -7 691.625 481.693   3
  -6  -3  -8 4167.21 805.509   5
   6   3   8 4195.24 847.005   4
  -6   3  -8 4034.82 848.478   1
  -6   3  -8 3728.71 585.838   3
   6   3   9 48945.1 2627.59   4
  -6   3  -9 47537.1 1967.93   3
  -6   3  -9 43180.6 2324.57   1
  -6  -3  -9 47571.7 2397.64   5
  -6   3 -10 1289.41 398.872   3
  -6  -3 -10 1832.74 667.660   5
   6   3  10 1297.87 705.792   4
  -6  -3 -10 508.738 577.678   1
  -6   3 -10-262.293 593.124   1
   6   3  11 47685.8 2796.61   4
  -6  -3 -11 46395.3 2422.13   1
  -6   3 -11 46333.4 2577.16   1
  -6   3 -12 609.025 678.070   1
   6   3  12-5.32782 621.423   4
  -6  -3 -12 1434.48 630.914   1
   6   3  13 651.680 594.896   4
  -6   3 -13 432.887 810.449   1
  -6  -3 -13 93.9253 644.463   1
   6   3  14 1447.40 887.587   4
  -6   3 -14-618.295 705.090   1
  -6  -3 -14 1625.15 789.025   1
  -6   3 -15 18951.2 1961.16   1
   6   3  15 21532.2 2134.58   4
  -6  -3 -15 20321.9 1846.10   1
  -6  -3 -16-579.452 553.719   1
  -6   4  15 1149.53 726.453   7
  -6  -4  15 1052.69 772.000   6
  -6   4  14 6978.77 1207.16   7
  -6  -4  14 6958.41 1188.31   6
  -6   4  13 29223.0 2125.73   7
  -6  -4  13 27759.0 2044.11   6
  -6   4  12 3842.51 880.096   7
  -6  -4  12 4966.31 926.066   6
  -6   4  11 11320.3 1295.46   7
  -6  -4  11 13946.8 1399.09   6
  -6   4  10 27732.8 1899.52   7
  -6  -4  10 29409.4 1858.69   6
  -6   4  10 27270.1 1526.74   6
  -6   4   9 7303.21 1016.56   7
  -6  -4   9 6222.59 932.802   6
  -6   4   9 9188.38 815.139   3
  -6   4   9 7283.07 793.551   6
  -6   4   8 2610.94 502.562   3
  -6  -4   8 2880.51 634.902   6
  -6   4   8 2189.92 503.170   6
  -6   4   8 2700.89 672.924   7
  -6   4   7 62994.8 1917.02   4
  -6   4   7 60681.6 2658.62   7
  -6  -4   7 63761.8 2574.69   6
  -6   4   7 65642.7 2354.38   6
  -6   4   7 63690.8 2276.95   3
  -6   4   6 64195.3 2654.45   7
  -6   4   6 65586.3 1920.80   4
  -6  -4   6 66555.4 2566.74   6
  -6   4   6 66897.2 2392.10   6
  -6   4   6 67164.9 2351.74   3
  -6   4   5 12020.0 1103.54   7
  -6  -4   5 13086.5 1109.20   6
  -6   4   5 13725.1 975.821   6
  -6   4   5 11472.0 948.267   3
  -6   4   4 82614.5 2879.29   7
  -6  -4   4 79882.4 2733.34   6
  -6   4   4 79588.9 2613.73   3
  -6   4   4 79737.7 2033.60   5
  -6   4   3 47947.4 2034.40   7
  -6  -4   3 49278.7 1975.81   6
  -6   4   3 46239.6 1911.97   3
  -6   4   3 45238.3 1360.99   5
  -6   4   2 3129.04 342.982   5
  -6   4   2 2885.00 562.492   7
  -6  -4   2 3937.92 670.690   6
  -6   4   2 3515.12 563.446   3
  -6   4   1 5606.85 798.833   5
  -6   4   1 7066.13 730.447   7
  -6  -4   1 7615.92 792.259   6
  -6   4   1 5146.08 670.755   3
   6   4   0 108629. 3126.72   4
  -6   4   0 109000. 3012.98   7
  -6  -4   0 102740. 3104.62   6
  -6   4   0 105084. 3186.05   3
  -6   4   0 106163. 2623.52   5
   6   4   1 8586.01 821.418   4
  -6   4  -1 8355.15 702.872   7
  -6  -4  -1 6663.45 709.558   6
  -6   4  -1 8451.29 642.006   5
  -6  -4  -1 7659.02 865.038   5
  -6   4  -1 7870.52 827.701   3
   6   4   2 12628.8 1019.01   4
  -6   4  -2 11122.6 750.289   7
  -6   4  -2 10298.8 751.755   5
  -6  -4  -2 12183.8 1038.72   5
  -6   4  -2 10283.9 913.876   3
  -6   4  -3 70525.9 2531.77   3
  -6  -4  -3 70405.8 2634.59   5
  -6  -4  -4 222.235 483.575   5
   6   4   4-136.077 514.101   4
  -6   4  -4 81.2983 413.067   1
  -6   4  -4 673.905 477.036   3
   6   4   5 24309.2 1621.63   4
  -6   4  -5 21671.0 1423.08   1
  -6   4  -5 20458.4 1308.04   3
  -6  -4  -5 23283.4 1508.91   5
   6   4   6 14268.2 1306.40   4
  -6   4  -6 12160.2 1023.42   3
  -6   4  -6 12252.2 1114.60   1
  -6  -4  -6 12605.9 1170.52   5
   6   4   7 40827.6 2295.83   4
  -6   4  -7 41516.4 1913.60   3
  -6   4  -7 38790.7 2045.86   1
  -6  -4  -7 42679.9 2172.44   5
  -6   4  -8 39.4940 366.646   3
  -6  -4  -8 737.865 487.527   5
   6   4   8 441.510 549.571   4
  -6   4  -8 837.935 559.785   1
  -6  -4  -9 10261.0 1157.94   5
   6   4   9 11640.9 1348.85   4
  -6   4  -9 11178.3 994.449   3
  -6   4  -9 10453.4 1235.08   1
  -6   4 -10 3054.46 608.952   3
  -6   4 -10 5230.86 990.838   1
  -6  -4 -10 3624.97 855.123   5
   6   4  10 2421.33 727.322   4
  -6  -4 -11 7170.57 1071.98   5
  -6   4 -11 6728.33 1084.29   1
   6   4  11 5660.51 1084.50   4
  -6  -4 -11 4934.62 862.279   1
  -6   4 -12-22.0214 590.844   1
  -6  -4 -12-64.6660 518.995   1
   6   4  12-116.769 556.576   4
   6   4  13 20243.7 1960.13   4
  -6   4 -13 17079.3 1789.26   1
  -6  -4 -13 19894.9 1659.91   1
   6   4  14 11895.8 1621.79   4
  -6   4 -14 10990.7 1478.51   1
  -6  -4 -14 12570.0 1391.36   1
  -6   4 -15 282.812 770.556   1
  -6  -4 -15 835.082 598.290   1
   6   4  15 758.855 671.930   4
  -6  -4 -16 3742.51 900.007   1
  -6   5  14 8929.87 1336.17   7
  -6  -5  14 9679.28 1353.68   6
  -6   5  13 1620.49 763.801   7
  -6  -5  13 1070.67 761.652   6
  -6  -5  12 16292.9 1565.30   6
  -6   5  12 14080.1 1500.69   7
  -6   5  11 251.364 530.927   7
  -6  -5  11 1296.74 632.890   6
  -6  -5  10 6893.06 1045.29   6
  -6   5  10 5880.42 977.865   7
  -6   5   9 255.724 374.461   3
  -6   5   9 271.258 500.929   7
  -6   5   8 69955.5 3049.30   7
  -6  -5   8 67345.9 2797.13   6
  -6   5   8 67570.1 2442.93   6
  -6   5   8 67078.3 2472.49   3
  -6   5   7 7113.29 821.211   3
  -6   5   7 6937.96 625.984   4
  -6   5   7 6855.18 996.956   7
  -6  -5   7 7423.67 941.169   6
  -6   5   7 6208.18 687.351   6
  -6   5   6 12416.7 1158.80   7
  -6   5   6 11955.2 796.572   4
  -6  -5   6 12856.9 1172.28   6
  -6   5   6 14142.6 1081.59   3
  -6   5   5 2620.13 575.112   3
  -6   5   5 3154.73 689.977   7
  -6  -5   5 2069.88 602.595   6
  -6   5   4 38181.7 1955.58   7
  -6  -5   4 37705.1 1827.78   6
  -6   5   4 38103.9 1796.62   3
  -6   5   3 7034.93 809.325   3
  -6   5   3 7912.55 914.466   7
  -6  -5   3 6862.05 829.021   6
  -6   5   2 159730. 4373.07   7
  -6   5   2 158963. 4287.23   3
  -6  -5   2 161531. 4186.24   6
  -6   5   1 14134.7 1055.22   7
  -6  -5   1 14477.9 1059.75   6
  -6   5   1 13201.0 1064.96   3
  -6   5   1 12909.6 598.862   5
   6   5   0 11811.5 1034.39   4
  -6   5   0 11481.1 930.227   7
  -6  -5   0 9884.73 900.211   6
  -6   5   0 11432.7 1021.27   3
  -6   5  -1 1440.61 438.982   7
  -6   5  -1 2417.91 650.977   3
   6   5   1 2084.76 565.461   4
  -6  -5  -1 486.639 428.070   6
  -6  -5  -1 1505.61 616.917   5
   6   5   2 68900.8 2628.68   4
  -6   5  -2 64548.3 2226.98   1
  -6   5  -2 61944.0 2466.20   3
  -6  -5  -2 70410.7 2601.43   5
   6   5   3 31508.4 1769.31   4
  -6   5  -3 30100.1 1519.65   1
  -6   5  -3 30631.3 1645.28   3
  -6  -5  -3 26630.0 1585.95   5
   6   5   4 43010.7 2176.37   4
  -6   5  -4 41031.7 1875.32   1
  -6   5  -4 40602.4 1963.17   3
  -6  -5  -4 41041.4 1988.76   5
   6   5   5 21848.3 1609.25   4
  -6   5  -5 18941.4 1332.37   3
  -6   5  -5 18969.2 1335.47   1
  -6  -5  -5 18596.6 1383.24   5
  -6  -5  -6 9174.65 1027.59   5
  -6   5  -6 9216.48 980.193   3
   6   5   6 9081.40 1129.65   4
  -6   5  -6 8698.54 1005.29   1
  -6  -5  -7 3358.30 762.773   5
  -6   5  -7 2677.74 587.141   3
   6   5   7 4196.92 877.976   4
  -6   5  -7 3006.81 721.735   1
   6   5   8 34303.9 2241.65   4
  -6   5  -8 32515.1 1772.08   3
  -6   5  -8 33173.9 2010.95   1
  -6  -5  -8 32312.0 1929.71   5
  -6  -5  -9 9201.13 1107.64   5
  -6   5  -9 6346.11 790.944   3
  -6   5  -9 7091.95 1126.42   1
   6   5   9 6794.66 1072.39   4
  -6  -5 -10 643.175 607.760   5
  -6   5 -10 53.1497 665.833   1
   6   5  10 592.417 658.843   4
  -6  -5 -11 3070.14 802.765   5
   6   5  11 1871.33 728.073   4
  -6  -5 -11 3899.47 762.795   1
  -6   5 -11 3852.78 1002.59   1
  -6   5 -12 21617.6 1930.02   1
  -6  -5 -12 23976.2 1741.50   1
   6   5  12 26104.0 2244.24   4
   6   5  13 2365.46 838.963   4
  -6  -5 -13 265.392 538.844   1
  -6   5 -13 1229.16 828.265   1
  -6   5 -14 6054.96 1235.84   1
   6   5  14 3975.89 1154.60   4
  -6  -5 -14 3099.31 798.690   1
  -6   6  14 2440.32 803.127   7
  -6  -6  14 2509.60 817.695   6
  -6   6  13 3008.90 864.226   7
  -6  -6  13 2851.18 741.178   6
  -6   6  12 4206.35 916.159   7
  -6  -6  12 4991.46 959.113   6
  -6   6  11 1013.75 629.797   7
  -6  -6  11 42.1792 635.177   6
  -6   6  10 7405.66 1116.38   7
  -6  -6  10 10204.0 1223.56   6
  -6   6   9-167.601 395.984   3
  -6   6   9 460.509 481.102   7
  -6  -6   9 210.506 601.777   6
  -6   6   8 383.260 388.844   3
  -6   6   8 431.403 512.430   7
  -6  -6   8 965.811 603.899   6
  -6   6   7 15590.4 1040.13   4
  -6   6   7 17702.4 1525.49   7
  -6  -6   7 18123.9 1448.34   6
  -6   6   7 17761.9 1284.72   3
  -6   6   6 103154. 3730.35   7
  -6  -6   6 93182.3 3306.19   6
  -6   6   6 98745.5 3310.74   3
  -6   6   5 181.917 421.747   3
  -6   6   5 870.486 436.673   7
  -6  -6   5-248.106 443.491   6
  -6   6   4 29283.1 1775.99   7
  -6  -6   4 30139.8 1640.35   6
  -6   6   4 29367.9 1653.32   3
  -6   6   3 4807.01 776.432   3
  -6   6   3 5113.89 811.951   7
  -6  -6   3 5074.34 724.685   6
  -6   6   2 25670.5 1608.53   7
  -6  -6   2 28154.6 1486.85   6
  -6   6   2 26524.7 1609.95   3
  -6   6   1 269.405 394.419   7
  -6   6   1 175.883 218.722   1
  -6  -6   1 230.293 445.102   6
   6   6   0 143188. 4209.66   4
  -6  -6   0 135303. 3769.40   6
  -6   6   0 134786. 3341.55   1
  -6   6   0 141681. 4158.00   3
  -6   6   0 150497. 4105.80   7
  -6   6  -1 180.424 582.072   3
  -6   6  -1 270.023 324.539   1
  -6  -6  -1-173.645 426.214   6
   6   6   1 10.8344 453.697   4
  -6  -6  -1 303.786 545.018   5
   6   6   2 44764.9 2236.98   4
  -6   6  -2 44363.2 1764.65   1
  -6   6  -2 42062.0 2076.47   3
  -6  -6  -2 43567.3 2056.75   5
   6   6   3 26766.9 1761.83   4
  -6   6  -3 25476.7 1590.65   3
  -6   6  -3 22659.2 1313.18   1
  -6  -6  -3 23895.4 1518.50   5
   6   6   4 23008.0 1656.95   4
  -6   6  -4 21485.5 1479.05   3
  -6   6  -4 19437.8 1249.68   1
  -6  -6  -4 21759.6 1449.76   5
  -6  -6  -5 942.903 549.327   5
  -6   6  -5 1556.07 602.874   3
   6   6   5 1047.45 609.610   4
  -6   6  -5 1045.58 488.629   1
   6   6   6 61581.0 2987.31   4
  -6   6  -6 60192.1 2597.41   3
  -6   6  -6 59822.0 2564.01   1
  -6  -6  -6 61713.4 2640.17   5
  -6  -6  -7 5258.14 855.542   5
  -6   6  -7 4385.76 771.806   3
  -6   6  -7 5629.52 899.284   1
   6   6   7 5736.84 1010.49   4
  -6   6  -8 365.702 470.192   1
  -6  -6  -8-187.452 443.959   5
  -6   6  -8-146.591 492.124   3
   6   6   8 249.299 611.639   4
  -6  -6  -9 2090.62 633.920   5
  -6   6  -9 1346.58 534.190   3
   6   6   9 1747.31 747.674   4
  -6   6  -9 1527.17 738.472   1
   6   6   9 2586.94 635.209   2
   6   6  10 27748.1 2199.26   4
  -6  -6 -10 24723.5 1832.46   5
  -6   6 -10 23845.0 1925.43   1
  -6  -6 -11-112.364 490.518   5
   6   6  11 598.660 659.550   4
  -6  -6 -11 190.235 457.794   1
  -6   6 -11 772.570 772.222   1
  -6   6 -12 3658.61 1080.59   1
   6   6  12 4472.14 1057.73   4
  -6  -6 -12 4291.83 809.279   1
  -6   6 -13 8601.43 1376.82   1
   6   6  13 6314.09 1300.35   4
   6   6  14 9296.72 1455.66   4
  -6   6 -14 9872.02 1512.54   1
  -6  -7  13-113.634 856.100   6
  -6   7  13 171.668 650.160   7
  -6   7  12 268.884 605.773   7
  -6  -7  12 1333.55 782.333   6
  -6   7  11 12646.7 1475.82   7
  -6  -7  11 10868.8 1268.10   6
  -6  -7  10 5920.76 1069.44   6
  -6   7  10 3442.29 848.788   7
  -6   7   9 11652.6 1336.59   7
   6   7  -9 9873.65 1165.95   2
  -6  -7   9 11217.6 1280.88   6
  -6   7   9 12045.0 1120.47   3
  -6   7   8 6482.94 850.234   3
  -6   7   8 6053.76 997.521   7
   6   7  -8 7355.35 1009.93   2
  -6  -7   8 4368.44 873.202   6
  -6   7   7 1333.73 491.481   3
  -6   7   7 1962.06 638.255   7
  -6  -7   7 1641.54 621.015   6
  -6   7   6 4383.82 786.490   3
  -6   7   6 4924.83 920.623   7
  -6  -7   6 4700.75 853.626   6
  -6   7   5 20494.7 1603.53   7
  -6  -7   5 21099.6 1413.78   6
  -6   7   5 19780.0 1459.37   3
  -6   7   4 14751.2 1348.26   7
  -6   7   4 11680.4 1124.69   3
  -6  -7   4 11663.8 1094.63   6
  -6   7   3 141.825 413.529   3
  -6   7   3 427.549 501.115   7
  -6  -7   3-55.0796 442.471   6
  -6   7   2 33345.1 1945.15   7
  -6  -7   2 34193.1 1677.24   6
  -6   7   2 32579.5 1857.08   3
  -6   7   1 24967.3 1634.29   3
  -6   7   1 25825.5 1667.30   7
  -6  -7   1 24555.9 1386.77   6
  -6   7   0 1494.33 588.282   3
  -6  -7   0 1609.21 477.933   6
  -6  -7   0 1777.11 649.757   5
   6   7   1 21945.2 1620.12   4
  -6  -7  -1 20707.8 1230.26   6
  -6   7  -1 24014.0 1608.72   3
  -6  -7  -1 21833.4 1486.96   5
   6   7   2 28379.2 1856.59   4
  -6   7  -2 25166.4 1697.67   3
  -6  -7  -2 27869.0 1651.49   5
  -6   7  -2 23455.5 1236.46   1
   6   7   3 21967.1 1702.33   4
  -6   7  -3 20546.9 1539.17   3
  -6  -7  -3 19260.8 1390.28   5
  -6   7  -3 21125.9 1234.95   1
   6   7   4 20956.4 1704.28   4
  -6   7  -4 20209.2 1498.85   3
  -6  -7  -4 19763.8 1417.89   5
  -6   7  -4 19928.4 1301.90   1
   6   7   5 62713.0 3055.74   4
  -6   7  -5 61551.2 2757.00   3
  -6  -7  -5 59226.8 2581.50   5
  -6   7  -5 59014.7 2454.03   1
  -6  -7  -6 1883.49 601.248   5
  -6   7  -6 2420.04 668.741   3
  -6   7  -6 2983.58 751.308   1
   6   7   6 1498.93 701.833   4
  -6  -7  -7 3102.84 730.688   5
  -6   7  -7 3278.21 753.204   3
   6   7   7 2718.29 729.223   4
  -6   7  -7 2665.60 738.155   1
   6   7   8 15298.6 1659.45   4
   6   7   8 10115.4 1100.63   2
  -6   7  -8 10997.2 1232.47   1
  -6   7  -8 12288.1 1238.78   3
  -6  -7  -8 11947.3 1200.82   5
  -6   7  -9 23020.0 1855.97   1
   6   7   9 23898.9 2061.69   4
  -6   7  -9 21108.5 1618.29   3
   6   7   9 18768.0 1454.75   2
  -6  -7  -9 24384.8 1762.02   5
  -6   7 -10-5.47445 615.942   1
  -6  -7 -10 547.740 548.922   5
   6   7  10-701.869 700.646   4
  -6   7 -11 26714.8 2146.33   1
   6   7  11 29489.5 2432.37   4
  -6  -7 -11 26363.3 1943.09   5
   6   7  12 14186.1 1720.71   4
  -6   7 -12 13355.8 1678.61   1
   6   7  13-275.937 695.254   4
  -6   7 -13 611.722 821.618   1
  -6   8  12 500.190 569.684   7
  -6  -8  12 636.402 796.623   6
  -6  -8  11 7026.06 1144.84   6
  -6   8  11 6879.73 1214.20   7
  -6   8  10 2286.90 807.134   7
  -6  -8  10 2643.18 900.514   6
  -6   8   9 16351.1 1676.54   7
  -6  -8   9 14254.0 1461.33   6
  -6   8   9 16918.6 1404.63   3
   6   8  -9 15391.3 1488.90   2
  -6   8   8 1440.39 575.582   3
  -6   8   8 3602.33 902.359   7
   6   8  -8 3118.42 853.517   2
  -6  -8   8 2384.75 775.289   6
  -6   8   7 17027.8 1613.35   7
  -6  -8   7 14906.5 1342.39   6
  -6   8   7 15980.7 1393.44   3
   6   8  -7 17283.9 1590.46   2
  -6   8   6 409.579 511.860   3
   6   8  -6-475.054 574.199   2
  -6  -8   6 775.413 563.304   6
  -6   8   6-530.129 512.252   7
  -6   8   5-173.116 419.514   3
  -6   8   5 24.5673 499.362   7
   6   8  -5 8.71197 590.636   2
  -6  -8   5 461.136 499.601   6
  -6   8   4 2278.28 652.718   3
  -6   8   4 2354.05 682.792   7
  -6  -8   4 1721.04 604.802   6
  -6   8   3 36799.4 2187.29   7
  -6  -8   3 35348.5 1803.99   6
  -6   8   3 32973.7 1994.69   3
  -6   8   2 6380.68 1002.12   3
  -6   8   2 5942.92 961.865   7
  -6  -8   2 6336.89 780.742   6
  -6   8   1 7694.35 1033.60   3
  -6  -8   1 7397.65 793.808   6
  -6   8   0 160.840 501.664   3
  -6  -8   0-46.2616 397.474   6
  -6  -8   0-275.555 426.033   5
   6   8   1 62871.9 2944.30   4
  -6  -8  -1 56714.1 2131.91   6
  -6   8  -1 58112.8 2752.04   3
  -6  -8  -1 62433.2 2632.62   5
  -6   8  -2 3493.63 786.074   3
   6   8   2 5544.34 961.866   4
  -6  -8  -2 3463.16 754.200   5
   6   8   3 30477.7 2148.88   4
  -6   8  -3 28705.5 1909.38   3
  -6  -8  -3 28315.9 1731.05   5
  -6   8  -4 10520.0 1211.35   3
   6   8   4 11673.2 1371.84   4
  -6   8  -4 8875.85 854.112   1
  -6  -8  -4 9715.63 1057.82   5
  -6  -8  -5 1054.83 516.552   5
  -6   8  -5 937.127 485.866   3
   6   8   5 1712.60 806.899   4
   6   8   5 1800.70 809.095   2
  -6   8  -5 254.165 374.477   1
  -6  -8  -6 884.806 506.355   5
  -6   8  -6 1452.22 695.706   3
   6   8   6 932.976 703.688   4
   6   8   6 1789.51 693.240   2
  -6   8  -6 704.175 516.625   1
  -6   8  -7 45130.5 2348.57   1
   6   8   7 46344.3 2867.77   4
  -6   8  -7 46445.8 2539.86   3
   6   8   7 41285.7 2311.58   2
  -6  -8  -7 46873.9 2359.29   5
  -6  -8  -8 102.070 382.294   5
  -6   8  -8 1107.77 640.075   3
  -6   8  -8 102.837 565.343   1
   6   8   8 1090.44 547.770   2
   6   8   8 830.404 680.714   4
  -6   8  -9 34208.4 2209.95   1
   6   8   9 31197.8 2449.69   4
  -6   8  -9 28922.8 1991.64   3
  -6  -8  -9 29194.3 1935.64   5
  -6  -8 -10 284.192 514.165   5
   6   8  10 748.670 809.349   4
  -6   8 -10 1446.40 839.842   1
  -6  -8 -11 3913.95 843.279   5
   6   8  11 4186.77 1022.46   4
  -6   8 -11 3871.04 947.222   1
  -6   8 -12 846.351 818.539   1
   6   8  12 399.672 780.751   4
  -6   8 -13 8587.81 1406.60   1
  -6   9  11 9525.68 1418.38   7
  -6  -9  11 9022.38 1277.50   6
  -6   9  10-513.437 632.361   7
  -6  -9  10-144.053 557.506   6
  -6   9   9 18384.6 1840.78   7
  -6  -9   9 17143.7 1553.88   6
   6   9  -9 17139.6 1584.48   2
  -6   9   9 18111.1 1571.98   3
  -6   9   8 3068.15 813.975   3
   6   9  -8 3044.61 874.305   2
  -6   9   8 2297.54 758.351   7
  -6  -9   8 4028.98 878.761   6
  -6   9   7 544.215 458.585   3
   6   9  -7-97.3248 609.097   2
  -6   9   7 1611.02 760.768   7
  -6  -9   7 214.204 517.244   6
  -6   9   6 1703.92 658.759   3
   6   9  -6 471.242 654.665   2
  -6   9   6 88.2990 490.384   7
  -6  -9   6 281.059 496.926   6
  -6   9   5 15117.0 1560.35   7
  -6  -9   5 15240.2 1288.04   6
  -6   9   5 18117.0 1576.21   3
   6   9  -5 15425.5 1594.49   2
  -6   9   4 13998.8 1489.15   7
  -6  -9   4 14255.4 1219.89   6
  -6   9   4 14423.1 1420.63   3
   6   9  -4 16264.3 1583.66   2
  -6   9   3 7238.28 1084.46   3
  -6   9   3 8437.21 1195.68   7
   6   9  -3 8291.91 1190.82   2
  -6  -9   3 7658.67 869.107   6
  -6   9   2 11871.1 1331.70   3
   6   9  -2 10990.6 1345.43   2
  -6  -9   2 11032.3 1000.09   6
  -6   9   1 5319.77 928.431   3
   6   9  -1 7935.32 1180.07   2
  -6   9   0 755.622 552.787   3
   6   9   0 1357.23 775.972   2
  -6  -9   0 1901.05 652.838   5
  -6   9  -1 2246.04 697.887   3
   6   9   1 2739.68 872.456   2
  -6  -9  -1 2874.66 651.814   5
   6   9   2 17108.0 1673.71   4
  -6   9  -2 17760.8 1614.32   3
   6   9   2 16488.8 1574.96   2
  -6  -9  -2 17950.1 1400.90   5
  -6   9  -3 5158.11 941.822   3
   6   9   3 6990.18 1105.77   2
   6   9   3 7152.99 1214.08   4
  -6  -9  -3 4731.22 820.695   5
  -6  -9  -4 5184.18 790.040   5
  -6   9  -4 6162.89 1061.02   3
   6   9   4 7914.96 1157.48   2
   6   9   4 9303.58 1315.11   4
   6   9   5 18373.1 1825.44   4
  -6   9  -5 19075.3 1680.17   3
   6   9   5 16202.6 1540.42   2
  -6  -9  -5 18189.4 1440.64   5
  -6  -9  -6 675.929 524.426   5
  -6   9  -6 1195.92 697.688   3
   6   9   6 1690.19 786.742   2
   6   9   6 1651.19 824.706   4
  -6  -9  -7 379.625 504.637   5
   6   9   7 174.491 552.926   2
  -6   9  -7-77.1657 479.730   3
   6   9   7 55.3605 587.691   4
  -6   9  -8 6196.41 1017.99   1
  -6  -9  -8 7855.22 1048.26   5
  -6   9  -8 7513.47 1150.00   3
   6   9   8 5830.67 1040.62   2
   6   9   8 7218.04 1308.00   4
  -6   9  -9 15555.9 1547.92   1
   6   9   9 13014.8 1691.33   4
  -6   9  -9 16428.1 1589.70   3
  -6  -9  -9 12937.7 1291.55   5
   6   9  10 1596.93 928.539   4
  -6   9 -10 2504.34 845.532   1
   6   9  11 1654.81 772.531   4
  -6   9 -11 2188.68 879.714   1
  -6   9 -12 1073.50 863.109   1
  -6 -10  10 6534.51 1091.92   6
   6  10  -9 337.665 663.675   2
  -6  10   9 1276.62 789.530   7
  -6 -10   9-730.534 604.880   6
  -6  10   8 1296.30 720.853   3
  -6  10   8 144.115 564.310   7
  -6 -10   8 344.634 499.059   6
   6  10  -8-303.358 702.505   2
  -6  10   7 7061.29 1146.39   3
   6  10  -7 6516.16 1172.77   2
  -6  10   7 9596.13 1467.10   7
  -6 -10   7 5789.24 970.667   6
   6  10  -6 14704.5 1603.05   2
  -6  10   6 10867.6 1459.25   7
  -6 -10   6 13456.1 1295.24   6
  -6  10   6 14049.4 1503.56   3
  -6  10   5 410.123 521.365   3
  -6  10   5 1841.02 744.102   7
  -6 -10   5 588.893 511.543   6
   6  10  -5 804.710 629.307   2
  -6  10   4 9921.98 1309.92   3
   6  10  -4 11922.7 1447.38   2
  -6 -10   4 13364.1 1206.37   6
  -6  10   3 4360.12 967.297   3
   6  10  -3 2361.89 768.143   2
  -6  10   2 3306.70 831.503   3
   6  10  -2 3617.74 968.057   2
  -6  10   1 213.086 572.422   3
   6  10  -1-208.464 601.592   2
  -6 -10   1 1079.94 580.853   5
  -6  10   0 29347.1 2132.25   3
   6  10   0 23057.4 1920.33   2
  -6 -10   0 26669.6 1783.65   5
  -6  10  -1 1027.79 766.562   3
   6  10   1 826.865 708.080   2
  -6 -10  -1 670.601 537.237   5
  -6  10  -2 12743.9 1435.51   3
   6  10   2 12191.3 1442.58   2
  -6 -10  -2 10613.2 1100.12   5
  -6  10  -3 3873.83 962.414   3
   6  10   3 2537.77 817.601   2
   6  10   3 3191.54 943.513   4
  -6 -10  -3 3273.56 763.267   5
  -6 -10  -4 5820.26 871.500   5
  -6  10  -4 6047.57 1086.37   3
   6  10   4 3945.62 915.667   2
   6  10   4 6265.31 1209.54   4
  -6 -10  -5 3360.45 775.619   5
  -6  10  -5 2946.35 905.637   3
   6  10   5 2019.96 819.508   2
   6  10   5 2686.04 1004.17   4
   6  10   6 11517.4 1358.13   2
   6  10   6 15432.4 1842.03   4
  -6  10  -6 16827.0 1740.31   3
  -6 -10  -6 12239.2 1230.97   5
  -6  10  -7 1060.54 690.380   3
   6  10   7 678.701 631.751   2
   6  10   8-93.5270 609.323   2
  -6  10  -8-396.682 519.299   3
   6  10   8 160.560 723.023   4
  -6  10  -9-194.299 637.636   3
   6  10   9 819.312 717.365   4
  -6 -11   9 359.548 610.848   6
   6  11  -8 9032.20 1388.46   2
  -6  11   8 8918.00 1287.63   3
  -6 -11   8 8765.89 1157.24   6
   6  11  -7-228.001 655.330   2
  -6  11   7 1169.37 641.810   3
  -6  11   7-330.601 507.864   7
   6  11  -6 3237.59 1047.92   2
  -6  11   6 3324.00 922.517   3
   6  11  -5 545.692 773.509   2
  -6  11   5 571.816 770.302   3
  -6  11   4 4739.41 1052.33   3
   6  11  -4 4696.83 1119.79   2
  -6  11   3 1932.31 824.804   3
   6  11  -3 1653.10 727.174   2
   6  11  -2 20163.8 1914.21   2
  -6  11   2 23517.4 2017.70   3
  -6 -11   2 18365.9 1557.38   5
  -6  11   1-601.322 524.511   3
  -6 -11   1 46.2996 491.608   5
   6  11   0 86.6228 728.377   2
  -6  11   0 1728.91 812.745   3
  -6 -11   0 692.159 461.613   5
  -6  11  -1 628.570 686.541   3
   6  11   1-238.220 684.596   2
  -6 -11  -1 244.014 479.430   5
  -6  11  -2 13393.8 1653.48   3
   6  11   2 12743.8 1545.83   2
  -6 -11  -2 10378.4 1126.01   5
  -6  11  -3 339.463 690.374   3
   6  11   3 967.440 752.238   2
  -6  11  -4 8824.94 1429.51   3
   6  11   4 8198.01 1253.70   2
   6  11   4 9855.78 1469.75   4
   6  11   5 790.709 682.523   2
  -6  11  -5 1331.17 907.468   3
   6  11   5 157.144 650.834   4
   6  11   6-790.432 626.701   2
  -6  11  -6 378.069 869.953   3
   6  11   6 1324.22 840.513   4
   6  11   7 484.255 681.481   2
  -6  11  -7 80.2156 709.026   3
   6  11   7 792.126 757.484   4
   6  11   8 204.373 663.499   2
  -6  11  -8 2399.35 828.863   3
   6 -11   9-604.194 730.504   6
  -6  11  -9 472.292 630.684   3
   6  12  -6 2635.95 1010.89   2
  -6  12   6 2488.78 906.522   3
   6  12  -5-722.081 771.363   2
  -6  12   5-43.7484 614.244   3
   6  12  -4 1849.35 896.380   2
  -6  12   4 1088.36 658.736   3
   6  12  -3 1988.95 903.734   2
  -6  12   3 2484.29 864.528   3
   6  12  -2 1953.70 799.729   2
  -6  12   2 3321.60 1044.51   3
   6  12  -1 450.361 688.531   2
  -6  12   1 1921.33 887.598   3
   6  12   0 14091.4 1747.36   2
  -6  12   0 15363.0 1758.54   3
   6  12   1 455.135 782.093   2
  -6  12  -1 1385.12 858.631   3
   6  12   2 2080.14 832.654   2
  -6  12  -2 3863.00 1151.18   3
   6  12   3 1030.88 746.920   2
  -6  12  -3 4045.33 1089.42   3
   6  12   4 1687.11 788.565   2
  -6  12  -4 5162.99 1246.15   3
   6  12   5-331.234 660.011   2
  -6  12  -5-1316.34 1043.93   3
  -6  12  -6 6782.09 1397.99   3
  -7   0  16-404.232 619.027   6
  -7   0  15-735.012 701.617   6
  -7   0  14 11910.0 1332.77   6
  -7   0  13-76.3263 523.601   6
  -7   0  12 29875.7 1924.48   6
  -7   0  11 843.509 600.677   6
  -7   0  10 1112.98 567.550   6
  -7   0   9-71.2145 460.259   6
  -7   0   8 171653. 4742.74   6
  -7   0   7 239.328 486.905   6
  -7   0   6 41761.0 1968.24   6
  -7   0   5 1093.86 620.678   6
  -7   0   4 11494.0 1019.68   6
  -7   0   3-75.1893 482.521   6
  -7   0   2 220250. 5377.83   6
  -7   0   1 497.418 419.870   5
   7   0   0 76614.7 1822.68   4
  -7   0   0 80788.8 2533.11   5
   7   0   1 471.097 268.693   4
  -7   0  -1-18.0548 428.037   5
  -7   0  -2 88557.6 2826.83   5
  -7   0  -3 656.190 546.447   5
  -7   0  -4 41281.9 1921.59   5
  -7   0  -5 147.889 465.511   5
  -7   0  -6 4186.27 786.821   5
  -7   0  -7 520.572 546.134   5
  -7   0  -8 91204.8 3449.81   5
  -7   0  -9-205.863 515.935   5
  -7   0 -10 9304.67 1174.20   1
  -7   0 -10 10236.2 955.365   3
  -7   0 -11 315.633 659.988   1
  -7   0 -12 49608.1 2740.51   1
  -7   0 -13 1196.44 656.904   1
  -7   0 -14 8440.14 1346.10   1
  -7   0 -15-480.314 613.421   1
  -7  -1  16 6911.89 1180.57   6
  -7   1  16 5640.55 1034.67   6
  -7  -1  15 1940.98 861.876   6
  -7   1  15 1603.03 668.399   6
  -7  -1  14 4315.92 911.833   6
  -7   1  14 4100.14 893.119   6
  -7  -1  13 13730.4 1407.66   6
  -7   1  13 16058.4 1439.36   6
  -7  -1  12 10478.5 1217.98   6
  -7   1  12 10562.6 1163.10   6
  -7  -1  11 8366.91 1030.94   6
  -7   1  11 9857.81 1094.88   6
  -7  -1  10 38613.4 2091.01   6
  -7   1  10 40749.6 2088.94   6
  -7  -1   9 4134.88 769.868   6
  -7   1   9 2861.89 664.327   6
  -7   1   9 3534.98 538.741   3
  -7  -1   8 14183.7 1190.91   6
  -7   1   8 15101.1 1237.52   6
  -7   1   8 16930.8 1108.19   3
  -7  -1   7 70233.8 2686.35   6
  -7   1   7 70342.8 2612.33   6
  -7  -1   6 41197.1 1955.59   6
  -7   1   6 41291.0 1898.61   6
  -7  -1   5 2173.52 612.588   6
  -7   1   5 3987.94 741.380   6
  -7  -1   4 92420.3 3013.01   6
  -7   1   4 88209.8 2925.79   6
  -7  -1   3 20692.4 1336.53   6
  -7   1   3 23013.2 1425.89   6
  -7  -1   2 1436.13 621.001   6
  -7   1   2 856.538 462.104   6
  -7   1   2 1068.14 443.866   5
  -7  -1   1 9693.20 950.697   6
  -7  -1   1 10065.8 923.849   5
  -7   1   1 12036.1 891.939   5
   7  -1   0 159577. 3319.51   4
   7   1   0 170066. 3519.21   4
  -7  -1   0 172840. 4342.61   5
  -7   1   0 169442. 4101.20   5
   7   1   1 5268.81 513.617   4
  -7  -1  -1 4420.37 662.636   5
  -7   1  -2 3740.65 629.054   5
  -7   1  -2 4108.81 356.239   7
   7   1   2 5280.78 575.381   4
  -7  -1  -2 5089.18 722.241   5
   7   1   3 59189.4 2158.04   4
  -7   1  -3 58240.2 1334.76   7
  -7  -1  -3 55527.7 2252.56   5
  -7   1  -3 58799.6 2255.88   5
   7   1   4 25150.6 1456.34   4
  -7  -1  -4 26310.4 1569.16   5
  -7   1  -4 27644.0 1543.93   5
  -7  -1  -5 3565.84 749.781   5
  -7   1  -5 1960.16 640.185   5
  -7  -1  -6 33687.2 1896.91   5
  -7   1  -6 31961.0 1790.72   5
  -7  -1  -7 14053.8 1320.85   5
  -7   1  -7 12634.7 1215.85   5
  -7  -1  -8 12433.0 1251.66   5
  -7   1  -8 12017.4 1047.63   3
  -7   1  -8 12340.9 1229.82   5
  -7  -1  -9 10265.2 1213.40   5
  -7   1  -9 8127.31 1089.40   1
  -7   1  -9 8743.99 860.115   3
  -7  -1 -10 46948.2 2479.51   1
  -7   1 -10 47778.7 2039.22   3
  -7   1 -10 46492.5 2502.38   1
  -7  -1 -10 45191.6 2510.57   5
  -7  -1 -11 1588.14 750.656   1
  -7   1 -11 2371.62 750.800   1
  -7  -1 -12 3325.69 909.675   1
  -7   1 -12 3548.41 920.520   1
  -7  -1 -13 1832.72 797.570   1
  -7   1 -13 1799.55 837.599   1
  -7   1 -14 17223.9 1778.53   1
  -7  -1 -14 16499.4 1728.64   1
  -7  -1 -15 1135.26 786.361   1
  -7   1 -15 175.630 751.391   1
  -7   2  15 33657.5 2482.05   7
  -7  -2  15 31619.5 2279.37   6
  -7  -2  14 1244.41 773.337   6
  -7   2  14-203.830 532.135   6
  -7  -2  13 2425.77 834.224   6
  -7   2  13 1577.54 640.245   6
  -7  -2  12 708.151 559.751   6
  -7   2  12 229.964 409.263   6
  -7  -2  11 23493.5 1719.22   6
  -7   2  11 21831.6 1544.41   6
  -7  -2  10 5067.81 888.783   6
  -7   2  10 5955.70 848.653   6
  -7  -2   9 22472.0 1561.05   6
  -7   2   9 22497.5 1483.55   6
  -7   2   9 23218.5 1271.33   3
  -7  -2   8 2303.56 707.445   6
  -7   2   8 3444.18 701.135   6
  -7   2   8 2106.85 501.919   3
  -7   2   7 15407.4 1163.35   6
  -7   2   7 15191.8 1054.96   3
  -7  -2   6 7123.48 893.878   6
  -7   2   6 8424.38 890.418   6
  -7   2   6 7937.91 809.390   3
  -7  -2   5 89176.2 2996.95   6
  -7   2   5 84923.2 2902.51   6
  -7   2   5 90492.0 2860.85   3
  -7  -2   4 26772.9 1524.31   6
  -7   2   4 26252.0 1489.64   6
  -7   2   4 27233.5 1434.46   3
  -7  -2   3 918.938 604.026   6
  -7   2   3 924.394 538.980   6
  -7  -2   2 11736.8 1044.90   6
  -7   2   2 11032.4 811.894   5
   7   2  -1 121779. 2846.20   4
  -7  -2   1 122137. 3665.42   6
  -7   2   0 1155.42 337.590   7
   7   2   0 959.925 302.434   4
  -7  -2   0 1139.09 493.778   6
  -7  -2   0 1791.71 577.840   5
  -7   2   0 1036.38 363.852   5
  -7   2  -1 67036.3 1978.63   7
  -7  -2  -1 70024.3 2532.82   5
  -7   2  -1 63909.7 2225.85   5
   7   2   2 12804.3 907.738   4
  -7   2  -2 11452.0 630.731   7
  -7  -2  -2 12933.5 1095.96   5
  -7   2  -2 11094.9 888.267   5
   7   2   3 59222.0 2197.80   4
  -7   2  -3 59081.4 1475.54   7
  -7  -2  -3 60306.1 2387.52   5
  -7   2  -3 63038.6 2299.69   5
   7   2   4 35621.3 1775.46   4
  -7   2  -4 33929.3 1731.68   3
  -7  -2  -4 36339.9 1880.98   5
  -7   2  -4 39615.7 1823.00   5
   7   2   5 149258. 4397.58   4
  -7   2  -5 147823. 4208.04   3
  -7  -2  -5 154271. 4466.91   5
  -7   2  -5 158229. 4336.03   5
   7   2   6 62041.2 2669.32   4
  -7   2  -6 59319.6 2372.97   3
  -7  -2  -6 64527.5 2690.16   5
  -7   2  -6 61283.1 2541.43   5
   7   2   7 33526.9 1999.21   4
  -7   2  -7 33559.6 1719.98   3
  -7  -2  -7 34773.2 2022.56   5
  -7   2  -7 33254.8 1889.88   5
   7   2   8 13856.4 1359.11   4
  -7   2  -8 14933.2 1346.19   1
  -7   2  -8 13180.7 1079.27   3
  -7  -2  -8 15478.7 1400.96   5
   7   2   9 17241.6 1594.66   4
  -7   2  -9 18849.5 1275.62   3
  -7   2  -9 16316.3 1451.68   1
  -7  -2  -9 18319.2 1547.40   5
  -7  -2 -10 857.773 536.948   5
   7   2  10 1110.66 778.164   4
  -7   2 -10 424.021 544.092   1
  -7   2 -10 1285.30 473.430   3
   7   2  11 35110.6 2391.22   4
  -7  -2 -11 37648.6 2281.93   1
  -7   2 -11 35114.5 2287.22   1
   7   2  12 16320.6 1721.58   4
  -7  -2 -12 15661.4 1518.15   1
  -7   2 -12 17660.5 1716.81   1
  -7   2 -13 1352.26 886.226   1
   7   2  13 43.1030 655.139   4
  -7  -2 -13 386.331 687.581   1
  -7   2 -14 8198.25 1372.91   1
   7   2  14 7327.63 1329.27   4
  -7  -2 -14 8790.14 1252.39   1
  -7  -2 -15 7280.08 1190.30   1
  -7   2 -15 8693.70 1432.97   1
  -7   3  15 1373.54 816.236   7
  -7  -3  15 1293.35 825.063   6
  -7   3  14 484.315 671.807   7
  -7  -3  14 1196.90 695.525   6
  -7   3  13 15656.1 1645.26   7
  -7  -3  13 16548.1 1604.66   6
  -7   3  12 1395.59 603.696   7
  -7  -3  12 1121.08 740.933   6
  -7   3  12 2112.45 658.501   6
  -7   3  11 16509.2 1591.64   7
  -7  -3  11 20030.8 1627.72   6
  -7   3  11 22086.5 1512.03   6
  -7   3  10 2126.96 756.055   7
  -7  -3  10 2701.61 736.144   6
  -7   3  10 2991.89 667.690   6
  -7   3   9 29466.2 1664.57   6
  -7  -3   9 27902.2 1780.57   6
  -7   3   9 25200.4 1367.15   3
  -7  -3   8 3718.89 816.065   6
  -7   3   8 3698.23 663.586   6
  -7   3   8 3347.45 545.833   3
  -7   3   7 12525.8 1076.17   6
  -7   3   7 11836.8 947.375   3
  -7  -3   7 11515.1 1124.01   6
  -7  -3   6 1897.86 636.233   6
  -7   3   6 1510.51 493.762   6
  -7   3   6 1169.27 476.234   3
  -7   3   5 2024.87 531.050   7
  -7  -3   5 913.259 539.133   6
  -7   3   5 1207.39 478.680   6
  -7   3   5 1723.74 477.120   3
  -7   3   4 2120.39 590.463   7
  -7   3   4 2407.66 575.792   6
  -7   3   4 2778.49 582.794   3
  -7  -3   3 170030. 4405.18   6
  -7   3   3 164944. 4317.17   3
  -7   3   3 165500. 3779.46   5
  -7   3   2 918.890 387.936   7
  -7  -3   2 909.151 601.415   6
  -7   3   2 270.101 463.529   3
  -7   3   2 854.966 322.623   5
  -7   3   1 69.2400 323.068   7
  -7  -3   1 386.606 507.214   6
  -7   3   1 904.643 534.755   3
  -7   3   1 122.892 298.676   5
   7   3   0 24519.6 1207.66   4
  -7   3   0 24772.7 1218.15   7
  -7  -3   0 23128.9 1376.89   6
  -7   3   0 25231.9 1463.30   3
  -7  -3   0 23592.7 1472.73   5
  -7   3   0 23385.1 1169.02   5
   7   3   1 136257. 3585.57   4
  -7   3  -1 135304. 3344.80   7
  -7   3  -1 139306. 3942.79   3
  -7  -3  -1 140124. 4006.12   5
  -7   3  -1 136984. 3539.73   5
  -7   3  -2 3907.98 623.712   5
  -7   3  -2 4686.38 471.584   7
   7   3   2 3954.90 559.113   4
  -7   3  -2 3657.40 687.726   3
  -7  -3  -2 4585.30 810.739   5
   7   3   3 157595. 4220.78   4
  -7   3  -3 148909. 4243.00   3
  -7  -3  -3 151438. 4325.38   5
  -7   3  -3 155320. 4065.81   5
  -7  -3  -4 5544.40 826.490   5
  -7   3  -4 8092.37 853.234   5
   7   3   4 8337.60 938.588   4
  -7   3  -4 5385.55 771.091   3
  -7  -3  -5 1024.43 692.036   5
  -7   3  -5 1106.44 547.833   5
   7   3   5 2133.79 656.194   4
  -7   3  -5 787.927 455.531   3
  -7  -3  -6 1948.80 737.817   5
   7   3   6 892.767 468.460   4
  -7   3  -6 1183.99 446.624   3
   7   3   7 129152. 4376.34   4
  -7   3  -7 128689. 4214.00   1
  -7   3  -7 133721. 3940.39   3
  -7  -3  -7 139418. 4404.28   5
  -7  -3  -8 762.328 618.130   5
   7   3   8 1670.07 656.505   4
  -7   3  -8 1313.61 628.515   1
  -7   3  -8 570.059 440.270   3
   7   3   9 61378.8 3026.37   4
  -7   3  -9 61117.5 2448.48   3
  -7   3  -9 60735.3 2871.26   1
  -7  -3  -9 65156.2 2993.91   5
  -7   3 -10 5637.88 746.519   3
  -7  -3 -10 4520.27 925.395   5
   7   3  10 7259.42 1156.27   4
  -7   3 -10 4706.23 890.412   1
  -7  -3 -11 3972.10 990.915   5
   7   3  11 3348.04 931.628   4
  -7  -3 -11 3092.52 828.415   1
  -7   3 -11 3600.48 980.983   1
  -7   3 -12 783.202 597.345   1
  -7  -3 -12-3.61830 543.162   1
   7   3  13 28741.1 2388.40   4
  -7  -3 -13 25045.1 1948.24   1
  -7   3 -13 27419.8 2202.66   1
   7   3  14-91.3180 568.654   4
  -7   3 -14 486.274 722.548   1
  -7  -3 -14 178.392 544.278   1
  -7  -3 -15 3171.67 854.299   1
   7   3  15 3857.85 1142.94   4
  -7   3 -15 4710.03 1169.84   1
  -7   4  14 1808.21 735.595   7
  -7  -4  14 3353.37 929.743   6
  -7   4  13 3848.16 904.097   7
  -7  -4  13 1635.50 739.200   6
  -7   4  12 1858.64 711.477   7
  -7  -4  12 1704.27 741.049   6
  -7   4  11 8755.20 1192.96   7
  -7  -4  11 9847.32 1230.01   6
  -7   4  10 3045.78 802.977   7
  -7  -4  10 3319.68 781.570   6
  -7   4  10 3119.91 633.992   6
  -7   4   9 9228.07 1149.66   7
  -7  -4   9 10599.5 1209.68   6
  -7   4   9 10578.0 1036.24   6
  -7   4   9 9554.11 890.542   3
  -7   4   8 15430.7 1391.66   7
  -7  -4   8 16827.5 1405.14   6
  -7   4   8 16758.6 1243.21   6
  -7   4   8 15327.2 1128.24   3
  -7   4   7 7466.00 822.360   3
  -7   4   7 5916.36 900.357   7
  -7  -4   7 9101.11 1077.33   6
  -7   4   7 6999.18 807.135   6
  -7   4   6 9305.78 1036.54   7
  -7   4   6 10642.1 957.909   6
  -7   4   6 10276.0 914.325   3
  -7  -4   6 10342.3 1043.83   6
  -7   4   5 15004.5 1244.05   7
  -7  -4   5 15318.5 1242.52   6
  -7   4   5 16749.3 1186.67   3
  -7   4   4 57356.7 2416.15   7
  -7  -4   4 60565.4 2435.93   6
  -7   4   4 60269.2 2339.31   3
  -7   4   4 60368.9 1799.72   5
  -7   4   3 1025.10 512.156   7
  -7  -4   3 1813.77 594.986   6
  -7   4   3 534.643 516.134   3
  -7   4   3 953.797 304.247   5
  -7   4   2 60518.8 2295.23   7
  -7  -4   2 65318.7 2396.99   6
  -7   4   2 56193.1 2252.38   3
  -7   4   2 51743.7 1679.31   5
  -7   4   1 82150.8 2708.61   7
  -7  -4   1 79530.3 2806.68   6
  -7   4   1 84340.2 2873.62   3
  -7   4   1 83560.8 2291.34   5
  -7   4   0 253.969 273.547   5
  -7   4   0-127.526 322.618   7
   7   4   0-20.4513 315.452   4
  -7  -4   0-390.564 516.355   6
  -7  -4   0 372.335 560.057   5
  -7   4   0-112.808 449.354   3
   7   4   1 36962.9 1699.98   4
  -7   4  -1 33862.3 1473.49   7
  -7   4  -1 30559.7 1660.06   3
  -7  -4  -1 32632.2 1790.77   5
  -7   4  -1 32290.5 1404.78   5
  -7   4  -2 46934.9 1686.96   7
  -7   4  -2 45830.9 2095.40   3
  -7  -4  -2 47764.5 2172.12   5
  -7   4  -2 44088.1 1758.63   5
   7   4   3 7645.21 860.956   4
  -7   4  -3 9197.76 834.224   5
  -7   4  -3 9906.57 987.141   3
  -7   4  -4 63143.1 2554.39   3
  -7  -4  -4 63612.1 2624.23   5
   7   4   5 97636.6 3505.17   4
  -7   4  -5 95320.6 3285.54   1
  -7   4  -5 93754.8 3218.10   3
  -7  -4  -5 93750.7 3393.37   5
   7   4   6 22699.2 1689.52   4
  -7   4  -6 21264.0 1495.03   1
  -7   4  -6 20614.8 1394.76   3
  -7  -4  -6 22616.7 1610.74   5
   7   4   7 23542.3 1758.96   4
  -7   4  -7 22265.7 1468.84   3
  -7   4  -7 21900.0 1604.11   1
  -7  -4  -7 25160.5 1739.59   5
   7   4   8 17643.2 1597.37   4
  -7   4  -8 15799.4 1229.06   3
  -7   4  -8 16741.7 1457.58   1
  -7  -4  -8 17447.9 1521.76   5
   7   4   9 13816.8 1458.76   4
  -7   4  -9 16192.5 1252.54   3
  -7   4  -9 13354.8 1371.35   1
  -7  -4  -9 15702.3 1487.34   5
  -7   4 -10 1326.11 487.494   3
   7   4  10 1212.27 798.690   4
  -7  -4 -10 1726.45 788.785   5
  -7   4 -10 261.139 683.177   1
   7   4  11 22385.8 1962.82   4
  -7  -4 -11 21642.9 1686.86   1
  -7   4 -11 20892.4 1791.54   1
  -7  -4 -11 20976.2 1812.03   5
   7   4  12 14483.2 1721.64   4
  -7   4 -12 11497.4 1426.04   1
  -7  -4 -12 14669.2 1447.27   1
   7   4  13 2215.81 931.929   4
  -7   4 -13 1298.87 662.786   1
  -7  -4 -13 1567.62 730.349   1
   7   4  14 17995.9 1976.93   4
  -7   4 -14 13717.6 1734.00   1
  -7  -4 -14 12959.1 1501.94   1
  -7  -4 -15 4934.58 1028.13   1
  -7   5  14 1880.52 699.028   7
  -7  -5  14 1926.76 884.252   6
  -7   5  13 2266.05 769.057   7
  -7  -5  13 2015.45 840.378   6
  -7   5  12 13261.3 1532.33   7
  -7  -5  12 15791.4 1568.50   6
  -7   5  11 1413.86 615.686   7
  -7  -5  11 2416.03 733.467   6
  -7   5  10 14000.6 1494.40   7
  -7  -5  10 15929.8 1473.13   6
  -7   5   9 152.916 352.617   3
  -7   5   9-148.920 426.281   7
  -7  -5   9 313.895 531.739   6
  -7   5   8 1779.22 543.958   3
  -7   5   8 588.867 443.444   7
  -7  -5   8 679.529 568.164   6
  -7   5   8 916.188 440.662   6
  -7   5   7 6458.69 797.383   3
  -7   5   7 8574.65 1054.23   7
  -7  -5   7 7000.27 961.762   6
  -7   5   6 72079.5 3074.47   7
  -7  -5   6 77185.0 2974.57   6
  -7   5   6 81770.0 2866.64   3
  -7   5   5 3078.47 628.501   3
  -7   5   5 2542.08 654.893   7
  -7  -5   5 2354.12 634.945   6
  -7   5   4 72236.8 2845.48   7
  -7  -5   4 71673.4 2718.68   6
  -7   5   4 70873.2 2653.97   3
  -7   5   3 1134.79 474.698   3
  -7   5   3 1026.43 480.871   7
  -7  -5   3 2161.90 655.678   6
  -7   5   2 9205.97 963.167   3
  -7   5   2 8143.14 888.113   7
  -7  -5   2 8166.03 916.115   6
  -7   5   1 4304.07 712.962   3
  -7   5   1 5653.25 737.281   7
  -7  -5   1 5447.63 791.697   6
  -7   5   0 84480.0 2752.13   7
   7   5   0 83403.1 2847.68   4
  -7  -5   0 76054.7 2754.24   6
  -7   5   0 80378.6 2892.84   3
  -7  -5   0 76439.0 2898.55   5
  -7   5   0 74573.9 2132.96   5
  -7   5  -1 333.494 531.319   3
  -7   5  -1 904.776 303.197   5
  -7   5  -1 827.258 382.826   7
   7   5   1 374.346 389.281   4
  -7  -5  -1 611.829 534.637   5
   7   5   2 67515.0 2633.50   4
  -7   5  -2 60418.5 2510.78   3
  -7  -5  -2 62875.3 2586.21   5
  -7   5  -3 1284.37 479.625   3
   7   5   3 1690.20 578.313   4
  -7  -5  -3 1433.29 602.895   5
   7   5   4 29156.1 1823.32   4
  -7   5  -4 34278.5 1765.72   1
  -7   5  -4 31479.2 1792.50   3
  -7  -5  -4 31299.2 1821.82   5
  -7  -5  -5 131.566 454.090   5
  -7   5  -5 97.8263 440.026   3
   7   5   5 408.818 513.515   4
  -7   5  -5-25.4016 501.601   1
   7   5   6 28301.1 1924.08   4
  -7   5  -6 30124.4 1761.95   3
  -7   5  -6 27624.8 1739.59   1
  -7  -5  -6 30293.6 1886.80   5
  -7   5  -7 2296.26 650.017   3
  -7  -5  -7 4069.47 867.577   5
   7   5   7 3268.78 824.949   4
  -7   5  -7 4306.52 835.605   1
   7   5   8 13457.0 1455.65   4
  -7   5  -8 13036.5 1184.87   3
  -7   5  -8 13468.7 1351.68   1
  -7  -5  -8 14489.0 1393.95   5
  -7   5  -9 995.426 768.412   1
  -7  -5  -9 1012.77 613.967   5
  -7   5  -9 951.001 521.958   3
   7   5   9 2120.09 755.818   4
   7   5  10 28846.6 2249.94   4
  -7   5 -10 26519.0 2011.67   1
  -7  -5 -10 29416.8 2106.81   5
  -7  -5 -11 547.947 730.611   5
  -7   5 -11 310.223 614.330   1
   7   5  11 708.894 634.715   4
  -7  -5 -11 895.675 533.449   1
   7   5  12 7313.66 1243.91   4
  -7  -5 -12 6079.84 1011.93   1
  -7   5 -12 4094.19 1035.66   1
  -7  -5 -13 999.884 633.993   1
   7   5  13 879.075 749.875   4
  -7   5 -13 1441.24 940.030   1
  -7   5 -14 28619.1 2438.56   1
   7   5  14 29559.8 2523.47   4
  -7  -5 -14 25215.5 1970.54   1
  -7   6  13 617.161 600.755   7
  -7  -6  13 834.298 822.583   6
  -7   6  12 11496.4 1490.97   7
  -7  -6  12 12834.9 1485.67   6
  -7   6  11 4396.28 951.346   7
  -7  -6  11 3979.76 937.796   6
  -7   6  10 1908.55 719.306   7
  -7  -6  10 1783.15 593.605   6
  -7   6   9 1123.29 664.388   7
  -7   6   9 701.100 482.723   3
  -7  -6   9 1270.67 609.576   6
  -7   6   8 64383.0 3085.84   7
  -7  -6   8 63141.4 2820.44   6
  -7   6   8 62195.7 2587.05   3
  -7   6   7 2765.45 648.664   3
  -7   6   7 2333.52 756.767   7
  -7  -6   7 2045.23 661.452   6
  -7   6   6 31153.2 1990.75   7
  -7  -6   6 27873.3 1752.34   6
  -7   6   6 30806.7 1770.61   3
  -7   6   5 6801.73 906.863   3
  -7   6   5 7148.79 979.783   7
  -7  -6   5 7864.60 958.755   6
  -7   6   4 14120.1 1274.63   7
  -7  -6   4 13465.1 1177.00   6
  -7   6   4 14117.3 1203.00   3
  -7   6   3 2664.16 649.822   3
  -7   6   3 2048.67 621.248   7
  -7  -6   3 1899.12 613.538   6
  -7   6   2 127636. 3999.69   7
  -7  -6   2 124463. 3760.52   6
  -7   6   2 119228. 3864.03   3
  -7   6   1 19084.2 1360.93   7
  -7  -6   1 17262.9 1250.41   6
  -7   6   1 17207.0 1362.32   3
   7   6   0 14544.1 1194.56   4
  -7   6   0 13590.9 1104.92   7
  -7  -6   0 12883.1 1105.17   6
  -7   6   0 15069.9 1246.23   3
  -7  -6   0 15250.3 1289.59   5
  -7   6  -1 622.775 546.694   3
  -7   6  -1 62.7859 304.895   1
  -7   6  -1 162.165 325.606   7
   7   6   1 429.994 447.634   4
  -7  -6  -1 1112.49 616.463   5
   7   6   2 53683.7 2473.14   4
  -7   6  -2 45107.9 1893.74   1
  -7   6  -2 48156.1 2314.32   3
  -7  -6  -2 47755.6 2281.36   5
  -7   6  -3 10134.7 1104.04   3
   7   6   3 11197.1 1174.77   4
  -7   6  -3 9163.08 894.940   1
  -7  -6  -3 10061.3 1102.21   5
  -7   6  -4 9384.84 1074.77   3
   7   6   4 9596.42 1135.45   4
  -7   6  -4 8586.06 922.097   1
  -7  -6  -4 9060.43 1033.14   5
   7   6   5 17343.4 1529.24   4
  -7   6  -5 14462.8 1289.03   3
  -7   6  -5 13600.6 1191.14   1
  -7  -6  -5 13981.0 1294.34   5
  -7  -6  -6 2010.99 770.474   5
  -7   6  -6 1644.20 572.476   3
   7   6   6 942.986 583.590   4
  -7   6  -6 1388.14 570.958   1
  -7  -6  -7 2024.03 681.706   5
  -7   6  -7 1027.90 558.657   3
   7   6   7 997.432 693.102   4
  -7   6  -7 1107.14 587.594   1
  -7   6  -8 9686.61 1170.10   1
   7   6   8 11457.5 1436.34   4
  -7   6  -8 11423.5 1156.86   3
  -7  -6  -8 12799.1 1338.52   5
  -7  -6  -9 4336.83 917.999   5
  -7   6  -9 2923.79 710.081   3
  -7   6  -9 2689.83 827.375   1
   7   6   9 3240.39 858.467   4
  -7  -6 -10 1768.48 711.111   5
   7   6  10 2230.18 868.800   4
  -7   6 -10 1973.43 727.067   1
  -7  -6 -11 3396.04 831.416   5
   7   6  11 3570.00 948.645   4
  -7  -6 -11 5114.56 923.301   1
  -7   6 -11 4794.33 1052.47   1
  -7   6 -12 17257.1 1813.37   1
   7   6  12 19424.1 1989.66   4
  -7  -6 -12 17397.8 1551.09   1
   7   6  13 281.301 769.520   4
  -7   6 -13 618.454 879.987   1
  -7   7  12 625.135 592.819   7
  -7  -7  12 1033.81 706.320   6
  -7   7  11 5933.05 1080.77   7
  -7  -7  11 7302.18 1218.06   6
  -7   7  10 14802.6 1625.33   7
  -7  -7  10 14928.3 1516.98   6
  -7   7   9 3092.94 665.702   3
  -7   7   9 3806.50 898.061   7
   7   7  -9 3035.89 781.284   2
  -7  -7   9 3515.74 746.503   6
  -7   7   8 233.333 517.110   3
  -7  -7   8 1099.17 696.885   6
  -7   7   8-431.034 563.613   7
  -7   7   7 20418.6 1712.28   7
  -7  -7   7 18676.7 1530.49   6
  -7   7   7 19175.0 1465.95   3
  -7   7   6 24945.3 1880.91   7
  -7  -7   6 23736.7 1650.47   6
  -7   7   6 23350.1 1622.60   3
  -7   7   5 763.928 520.014   3
  -7   7   5 1190.48 696.170   7
  -7  -7   5 865.821 584.324   6
  -7   7   4 25425.8 1790.27   7
  -7  -7   4 21040.2 1496.87   6
  -7   7   4 21538.4 1554.80   3
  -7   7   3 16709.8 1455.24   7
  -7  -7   3 16937.5 1281.24   6
  -7   7   3 16415.1 1359.82   3
  -7   7   2 8921.38 1031.66   7
  -7   7   2 9462.67 1107.63   3
  -7  -7   2 9278.31 970.318   6
  -7   7   1 9214.43 1073.56   3
  -7   7   1 8867.96 1028.63   7
  -7  -7   1 7004.96 842.351   6
  -7   7   0 27960.0 1694.34   7
  -7  -7   0 27663.8 1563.42   6
  -7   7   0 27263.6 1776.31   3
  -7  -7   0 22855.9 1605.01   5
   7   7   1 18931.1 1531.98   4
  -7   7  -1 18754.7 1500.96   3
  -7  -7  -1 17336.1 1403.91   5
  -7   7  -2 1869.30 703.103   3
   7   7   2 1004.84 575.640   4
  -7   7  -2 345.338 324.401   1
  -7  -7  -2 1236.58 530.221   5
   7   7   3 35979.5 2222.15   4
  -7   7  -3 36475.0 2111.08   3
  -7   7  -3 32917.8 1666.04   1
  -7  -7  -3 32802.3 1908.99   5
  -7   7  -4 612.035 678.432   3
   7   7   4 624.721 534.659   4
  -7   7  -4 40.1158 372.705   1
  -7  -7  -4 314.468 426.099   5
  -7  -7  -5-113.966 492.687   5
  -7   7  -5-0.50256 421.655   1
  -7   7  -5-217.776 548.479   3
   7   7   5 704.469 624.614   4
  -7  -7  -6 5778.69 972.471   5
  -7   7  -6 4900.19 900.159   3
  -7   7  -6 4844.25 838.046   1
   7   7   6 5342.17 1025.47   4
   7   7   7 19435.9 1782.00   4
  -7   7  -7 17297.2 1508.98   3
  -7  -7  -7 20420.6 1625.93   5
  -7   7  -7 18171.2 1526.46   1
  -7  -7  -8 5856.48 987.385   5
  -7   7  -8 7053.08 1042.93   3
   7   7   8 5709.75 1031.79   4
  -7   7  -8 6102.55 958.640   1
   7   7   9 17097.6 1786.67   4
  -7   7  -9 16332.5 1445.70   3
  -7  -7  -9 15246.1 1470.42   5
  -7   7  -9 14618.8 1547.91   1
  -7  -7 -10 7267.03 1152.52   5
   7   7  10 6823.24 1250.04   4
  -7   7 -10 6748.38 1169.29   1
  -7  -7 -11 1483.55 689.876   5
   7   7  11 1471.87 860.067   4
  -7   7 -11 1937.14 811.043   1
  -7   7 -12 5074.38 1145.19   1
   7   7  12 3370.44 937.494   4
  -7   7 -13 3697.52 1068.21   1
  -7   8  11 7330.23 1279.53   7
  -7  -8  11 8174.35 1268.69   6
  -7   8  10 855.736 588.119   7
  -7  -8  10 630.963 589.750   6
  -7   8   9 20839.4 1923.38   7
  -7  -8   9 22998.8 1804.13   6
  -7   8   9 21642.2 1635.94   3
   7   8  -9 20182.9 1767.04   2
  -7   8   8 485.654 504.934   3
  -7   8   8 333.791 695.834   7
   7   8  -8 586.026 667.945   2
  -7  -8   8 414.598 556.018   6
  -7   8   7 511.617 479.278   3
  -7   8   7 1266.98 650.886   7
   7   8  -7 337.418 517.523   2
  -7  -8   7 838.114 602.274   6
  -7   8   6 279.131 464.995   3
  -7   8   6-350.545 468.111   7
  -7  -8   6-340.215 516.750   6
  -7   8   5 27197.6 2014.04   7
  -7  -8   5 25635.8 1714.11   6
  -7   8   5 25720.8 1816.80   3
  -7   8   4 50.7847 492.612   3
  -7   8   4 457.865 550.365   7
  -7  -8   4 1192.24 574.200   6
  -7   8   3 411.491 515.259   3
  -7   8   3 376.501 478.661   7
  -7  -8   3 125.558 411.989   6
  -7   8   2 1723.92 680.274   3
  -7   8   2 1262.30 626.233   7
  -7  -8   2 2587.10 654.027   6
  -7   8   1 19633.2 1584.74   7
  -7  -8   1 17605.1 1310.01   6
  -7   8   1 17235.2 1514.39   3
  -7   8   0 1434.34 570.844   3
  -7  -8   0 1999.86 506.955   6
  -7  -8   0 2800.57 716.754   5
  -7   8  -1 24978.0 1804.24   3
  -7  -8  -1 22919.1 1607.68   5
  -7   8  -2 1300.85 614.903   3
   7   8   2 2045.48 703.717   4
  -7  -8  -2 3428.30 792.081   5
  -7   8  -3 4433.53 883.100   3
   7   8   3 6808.03 1110.28   4
  -7  -8  -3 5326.59 845.963   5
  -7   8  -4-117.248 551.327   3
   7   8   4-390.829 619.101   4
  -7  -8  -4 445.755 500.299   5
   7   8   5 39409.7 2572.10   4
  -7   8  -5 39313.6 2347.87   3
  -7  -8  -5 35927.3 2119.13   5
  -7   8  -5 37736.3 1979.01   1
  -7  -8  -6 2574.35 710.212   5
  -7   8  -6 2647.69 790.689   3
   7   8   6 3800.61 969.193   4
  -7   8  -6 2939.16 649.399   1
  -7  -8  -7 6309.80 967.355   5
  -7   8  -7 5709.89 1023.75   3
   7   8   7 5901.80 1109.38   4
   7   8   7 6222.17 1016.74   2
  -7   8  -7 5317.20 975.207   1
  -7  -8  -8 940.621 629.708   5
  -7   8  -8 1109.88 665.947   3
   7   8   8-283.789 604.161   4
   7   8   8 524.739 605.009   2
  -7   8  -8 1176.21 722.607   1
  -7   8  -9 6827.85 1125.94   1
  -7  -8  -9 9755.96 1197.29   5
  -7   8  -9 6745.09 1096.98   3
   7   8   9 8746.16 1326.70   4
  -7  -8 -10 513.008 484.640   5
  -7   8 -10 1995.00 831.252   1
   7   8  10-7.51704 669.101   4
  -7  -8 -11 11515.2 1370.75   5
  -7   8 -11 14076.8 1635.98   1
   7   8  11 15500.1 1852.33   4
  -7   8 -12 202.362 575.783   1
  -7  -9  11 4160.88 918.786   6
  -7   9  10 10516.8 1519.55   7
  -7  -9  10 8051.52 1223.26   6
   7   9  -9 1033.87 698.227   2
  -7   9   9 1310.85 765.335   7
  -7  -9   9 286.583 641.267   6
  -7   9   8-366.598 449.311   3
   7   9  -8 80.3458 630.174   2
  -7   9   8-346.812 609.427   7
  -7  -9   8-176.870 463.100   6
  -7   9   7 2001.31 682.677   3
  -7   9   7 1904.38 742.643   7
   7   9  -7 2705.29 930.369   2
  -7  -9   7 1626.46 687.642   6
  -7   9   6 3209.62 749.113   3
  -7   9   6 5095.85 1056.05   7
   7   9  -6 6155.00 1104.86   2
  -7  -9   6 5051.22 885.422   6
  -7   9   5 1216.72 715.378   3
  -7   9   5 542.924 693.503   7
   7   9  -5 1949.84 867.994   2
  -7  -9   5 874.879 533.052   6
  -7   9   4 3598.24 866.967   3
  -7   9   4 4294.01 932.102   7
   7   9  -4 4467.83 1031.00   2
  -7  -9   4 4867.89 883.956   6
  -7   9   3 11707.1 1319.80   3
  -7   9   3 14418.1 1516.05   7
   7   9  -3 12265.8 1476.13   2
  -7  -9   3 13394.8 1213.55   6
  -7   9   2 770.581 576.363   3
  -7  -9   2-178.231 376.025   6
  -7   9   1 133.577 537.424   3
  -7  -9   1 964.075 643.917   5
  -7   9   0 13278.6 1416.16   3
  -7  -9   0 12367.1 1238.75   5
  -7   9  -1 22368.8 1824.92   3
  -7  -9  -1 22656.9 1617.51   5
  -7   9  -2-15.7597 627.419   3
   7   9   2 394.676 602.661   2
   7   9   2-422.578 469.853   4
  -7  -9  -2 702.573 513.096   5
   7   9   3 37299.5 2508.29   4
  -7   9  -3 32464.7 2237.76   3
   7   9   3 32188.8 2179.82   2
  -7  -9  -3 33980.3 2028.84   5
  -7  -9  -4 1465.81 586.614   5
  -7   9  -4 1435.77 812.826   3
   7   9   4 305.091 616.322   2
   7   9   4 1010.81 671.552   4
  -7  -9  -5 261.203 516.972   5
  -7   9  -5 153.310 548.523   3
   7   9   5 1079.28 721.883   2
   7   9   5-19.3133 624.214   4
  -7  -9  -6 3261.81 787.708   5
  -7   9  -6 4058.54 891.375   3
   7   9   6 2737.04 867.104   2
   7   9   6 4319.30 991.673   4
   7   9   7 20223.4 2090.85   4
  -7   9  -7 21285.1 1875.58   3
   7   9   7 19553.5 1698.15   2
  -7  -9  -7 20673.5 1691.32   5
  -7  -9  -8 323.477 527.762   5
  -7   9  -8 902.785 797.996   3
   7   9   8 309.898 560.689   2
   7   9   8-1088.84 777.766   4
   7   9   9 15438.3 1870.86   4
  -7   9  -9 12853.5 1383.38   1
  -7   9  -9 15467.8 1599.25   3
  -7  -9  -9 16970.9 1555.87   5
  -7  -9 -10 4744.61 970.372   5
   7   9  10 5224.04 1225.10   4
  -7   9 -10 4864.00 1042.46   1
  -7   9 -11 11.1128 619.469   1
  -7 -10  10 1390.97 715.092   6
  -7 -10   9 348.503 517.967   6
   7  10  -8 13600.2 1608.32   2
  -7  10   8 13927.7 1706.05   7
  -7 -10   8 12814.2 1416.26   6
  -7  10   8 15336.1 1583.91   3
  -7  10   7 60.1828 631.170   3
   7  10  -7 1156.45 845.331   2
  -7  10   7 317.418 759.254   7
  -7 -10   7-60.9658 581.790   6
  -7  10   6 2100.24 827.476   3
   7  10  -6 1172.53 858.652   2
  -7  10   6 1759.77 850.569   7
  -7 -10   6 816.545 511.531   6
  -7  10   5 316.305 527.691   3
   7  10  -5 383.796 722.989   2
  -7  10   5 549.494 567.387   7
  -7 -10   5 845.658 600.393   6
  -7  10   4 5773.01 1071.30   3
  -7  10   4 8533.19 1305.78   7
   7  10  -4 6307.50 1154.05   2
  -7  10   3 1195.53 697.016   3
   7  10  -3 799.948 826.197   2
  -7  10   2 24380.1 1989.62   3
   7  10  -2 23131.5 1991.40   2
  -7  10   1 10355.0 1324.55   3
   7  10  -1 11494.1 1520.40   2
  -7 -10   1 8030.34 1050.21   5
  -7  10   0 400.152 662.902   3
   7  10   0 910.597 834.942   2
  -7 -10   0 266.097 473.080   5
  -7  10  -1 648.603 605.221   3
   7  10   1 1715.71 840.912   2
  -7 -10  -1 2125.20 704.175   5
  -7  10  -2 12013.2 1442.06   3
   7  10   2 8777.21 1291.97   2
  -7 -10  -2 12735.4 1264.21   5
  -7  10  -3 3001.77 884.574   3
   7  10   3 2434.91 847.861   2
   7  10   3 1358.22 609.514   4
  -7 -10  -3 2275.21 622.807   5
  -7 -10  -4 3202.56 730.071   5
  -7  10  -4 1621.17 673.968   3
   7  10   4 1267.75 755.142   2
   7  10   4 2822.08 935.456   4
  -7 -10  -5 6395.64 935.939   5
  -7  10  -5 6129.12 1198.55   3
   7  10   5 9080.28 1350.86   2
   7  10   5 7659.68 1302.27   4
  -7 -10  -6 2803.90 740.604   5
  -7  10  -6 2860.26 861.633   3
   7  10   6 2833.33 815.699   2
   7  10   6 3265.71 1007.22   4
  -7 -10  -7 2307.72 659.509   5
   7  10   7 2599.95 776.786   2
  -7  10  -7 2327.98 929.426   3
   7  10   7 1945.88 833.433   4
  -7  10  -8 12834.3 1561.38   3
   7  10   8 11009.0 1362.76   2
   7  10   8 13569.8 1742.23   4
  -7  10  -9 1102.17 740.923   3
  -7 -11   9-800.545 683.510   6
   7  11  -8-99.6986 690.414   2
  -7  11   8 215.040 615.113   3
  -7 -11   8 1110.51 656.517   6
   7  11  -7 927.654 721.964   2
  -7  11   7 1591.95 787.179   3
   7  11  -6 13887.4 1637.72   2
  -7  11   6 13083.0 1699.65   7
  -7  11   6 14207.5 1586.01   3
  -7  11   5 1634.12 842.176   3
   7  11  -5 532.329 695.787   2
  -7  11   4 9895.51 1415.91   3
   7  11  -4 7725.49 1318.58   2
  -7  11   3 1134.18 803.960   3
   7  11  -3 1785.85 796.211   2
  -7  11   2 3663.43 996.690   3
   7  11  -2 2886.10 1018.08   2
  -7 -11   2 3053.92 793.904   5
  -7  11   1 362.971 780.573   3
   7  11  -1-390.711 607.998   2
  -7 -11   1 1238.20 649.318   5
  -7  11   0 8623.25 1375.38   3
   7  11   0 6993.43 1219.13   2
  -7 -11   0 7230.76 1022.27   5
  -7  11  -1 1509.04 852.443   3
   7  11   1 848.719 624.895   2
  -7 -11  -1 1103.47 608.162   5
   7  11   2 1165.21 678.343   2
  -7 -11  -2 1345.16 625.552   5
  -7  11  -3 1042.49 702.760   3
   7  11   3-406.717 567.014   2
  -7 -11  -3-456.019 457.226   5
  -7  11  -4 12855.6 1653.53   3
   7  11   4 13218.4 1530.41   2
   7  11   4 14127.3 1841.90   4
  -7  11  -5 917.315 657.180   3
   7  11   5 1725.01 711.094   2
   7  11   5 1035.72 833.738   4
  -7  11  -6 7701.72 1335.51   3
   7  11   6 6302.54 1142.74   2
   7  11   6 8210.79 1504.28   4
   7  11   7 289.857 489.375   2
  -7  11  -7 2708.49 1056.13   3
   7  11   8 1706.72 692.825   2
  -7  11  -8 3400.36 1032.42   3
  -7  11  -9-578.033 708.503   3
  -7 -12   3-23.2086 588.801   5
  -7  12   2 6693.82 1240.55   3
  -7 -12   2 5351.36 994.848   5
  -7 -12   1 4163.34 858.529   5
  -7  12   1 4487.86 1155.45   3
  -7  12   0 3925.56 1116.54   3
  -7  12  -1 3642.58 1094.88   3
  -8   0  15 29.7054 461.862   6
  -8   0  14 5437.95 984.228   6
  -8   0  13-202.973 528.137   6
  -8   0  12 7744.10 1073.74   6
  -8   0  11 381.212 542.314   6
  -8   0  10 28180.8 1828.80   6
  -8   0   9 374.788 542.308   6
  -8   0   8 11186.6 1115.13   6
  -8   0   7 713.272 685.566   6
  -8   0   6 168821. 4782.23   6
  -8   0   5-134.449 514.802   6
  -8   0   4 50511.1 2278.06   6
  -8   0   3-209.991 513.202   6
  -8   0   2 3929.88 747.959   6
  -8   0   2 4649.13 707.995   5
  -8   0   1 910.192 463.312   5
   8   0   0 158163. 3216.78   4
  -8   0   0 160637. 4220.14   5
   8   0   1 471.183 252.998   4
  -8   0  -1 288.693 452.243   5
   8   0   2 691.069 367.347   4
  -8   0  -2 535.049 505.867   5
  -8   0  -3 356.210 519.762   5
   8   0   3 477.647 409.738   4
  -8   0  -4 126393. 3915.47   5
  -8   0  -5 195.015 505.881   5
  -8   0  -6 52500.3 2517.24   5
  -8   0  -7-437.120 536.198   5
  -8   0  -8 13667.0 1396.55   5
  -8   0  -9 200.774 577.201   5
  -8   0 -10 82780.9 3071.00   3
  -8   0 -10 98570.5 3886.07   1
  -8   0 -11 1690.56 831.349   1
  -8   0 -12 13612.8 1529.23   1
  -8   0 -13 657.448 690.679   1
  -8   0 -14 25784.7 2224.38   1
  -8   1  16-302.166 577.294   6
  -8  -1  15 2793.33 789.735   6
  -8   1  15 2969.93 928.219   6
  -8   1  14 15185.0 1534.84   6
  -8  -1  14 11652.6 1394.84   6
  -8  -1  13 1286.51 634.169   6
  -8   1  13 704.883 468.635   6
  -8  -1  12 26658.3 1928.88   6
  -8   1  12 28827.5 1929.06   6
  -8  -1  11 2160.75 680.363   6
  -8   1  11 2236.94 711.864   6
  -8  -1  10 41.8277 520.778   6
  -8   1  10 997.263 610.969   6
  -8  -1   9 3416.05 794.405   6
  -8   1   9 3804.58 786.920   6
  -8   1   9 2832.48 562.994   3
  -8  -1   8 83495.4 3166.09   6
  -8   1   8 85547.1 3141.89   6
  -8   1   8 79707.2 2816.72   3
  -8  -1   7 17086.9 1371.38   6
  -8   1   7 15640.1 1302.73   6
  -8  -1   6 86037.6 3145.77   6
  -8   1   6 87246.4 3128.60   6
  -8  -1   5 766.655 642.696   6
  -8   1   5-673.524 472.583   6
  -8  -1   4 4228.76 788.120   6
  -8   1   4 3760.32 799.181   6
  -8  -1   3 48.3865 560.247   6
  -8   1   3 1006.62 501.173   6
  -8  -1   2 53136.0 2313.39   6
  -8   1   2 50997.0 1999.51   5
  -8  -1   1 70102.0 2604.28   6
  -8  -1   1 69837.3 2554.12   5
  -8   1   1 70951.3 2387.69   5
   8   1   0 2199.48 307.353   4
  -8  -1   0 2324.54 629.489   5
  -8   1   0 1878.63 525.832   5
   8   1   1 48808.3 1602.17   4
  -8  -1  -1 47031.7 2036.02   5
  -8   1  -1 47660.2 1959.53   5
   8   1   2 45659.6 1687.49   4
  -8   1  -2 42416.7 1356.57   7
  -8  -1  -2 43580.1 2008.00   5
  -8   1  -2 46325.4 1985.21   5
   8   1   3 22771.1 1286.68   4
  -8  -1  -3 22868.8 1488.84   5
  -8   1  -3 22097.5 1396.83   5
  -8  -1  -4 910.868 595.585   5
  -8   1  -4 1961.90 654.888   5
   8   1   4 1856.06 469.873   4
   8   1   5 13656.4 1177.39   4
  -8  -1  -5 13283.7 1222.51   5
  -8   1  -5 15082.0 1306.50   5
   8   1   6 85566.4 3254.10   4
  -8  -1  -6 91021.0 3426.83   5
  -8   1  -6 89311.2 3340.85   5
  -8  -1  -7 32912.0 2040.59   5
  -8   1  -7 34961.1 2064.73   5
  -8   1  -8 43825.6 2136.84   3
  -8  -1  -8 46565.0 2467.21   5
  -8   1  -8 46141.2 2462.39   5
  -8   1  -9 21118.4 1755.70   1
  -8   1  -9 19653.4 1387.09   3
  -8  -1  -9 22895.3 1820.70   5
  -8  -1 -10 2303.59 739.627   5
  -8   1 -10 473.070 672.668   1
  -8   1 -10 1497.21 465.595   3
  -8   1 -11 15308.2 1564.13   1
  -8  -1 -11 19680.3 1746.84   1
  -8  -1 -12 36813.9 2428.44   1
  -8   1 -12 35880.0 2407.19   1
  -8  -1 -13 863.240 761.540   1
  -8   1 -13 394.354 679.704   1
  -8   1 -14 15763.1 1779.20   1
   8   1  14 11537.9 1639.79   4
  -8  -1 -14 14205.7 1643.94   1
  -8  -1 -15 2721.32 1011.98   1
  -8  -2  14 2402.01 866.873   6
  -8   2  14 4735.63 935.363   6
  -8  -2  13 5620.05 1052.51   6
  -8   2  13 9189.55 1160.82   6
  -8  -2  12 2535.79 885.027   6
  -8   2  12 2337.86 649.877   6
  -8  -2  11 3842.30 929.326   6
  -8   2  11 4945.96 846.846   6
  -8  -2  10 24041.5 1749.08   6
  -8   2  10 25844.1 1722.74   6
  -8  -2   9 20734.4 1577.12   6
  -8   2   9 21574.0 1534.96   6
  -8   2   9 21787.0 1335.26   3
  -8  -2   8-113.961 521.549   6
  -8   2   8 1234.59 598.801   6
  -8   2   8-260.708 378.044   3
  -8   2   7 12873.3 1046.34   3
  -8  -2   7 10870.5 1109.13   6
  -8   2   7 10592.3 1063.68   6
  -8   2   6 8631.39 909.781   3
  -8  -2   6 9390.62 1065.40   6
  -8   2   6 8261.97 960.519   6
  -8  -2   5 19908.9 1426.16   6
  -8   2   5 19121.4 1383.75   6
  -8   2   5 20133.4 1316.47   3
  -8  -2   4 46454.8 2174.16   6
  -8   2   4 40918.1 1956.66   6
  -8   2   4 40507.8 1949.65   3
  -8  -2   3 111115. 3529.02   6
  -8   2   3 100761. 2948.15   5
  -8  -2   2 174.471 625.019   6
  -8   2   2-589.832 379.328   5
  -8   2   1 26883.2 1350.12   7
  -8  -2   1 28879.9 1618.95   6
  -8  -2   1 30154.5 1658.25   5
  -8   2   1 29972.0 1413.80   5
   8   2   0 13529.4 787.688   4
  -8   2   0 12238.2 846.350   7
  -8  -2   0 12764.8 1110.81   5
  -8   2   0 13404.1 974.053   5
   8   2   1 44267.9 1620.96   4
  -8   2  -1 39408.3 1488.46   7
  -8  -2  -1 46019.7 2074.27   5
  -8   2  -1 41029.2 1793.52   5
  -8   2  -2 2003.44 505.675   5
  -8   2  -2 1881.49 306.146   7
   8   2   2 2030.11 428.339   4
   8   2   3 167047. 4349.42   4
  -8  -2  -3 158952. 4574.57   5
  -8   2  -3 169267. 4533.89   5
  -8  -2  -4 442.996 570.688   5
  -8   2  -4 1567.31 562.919   5
   8   2   4 1811.12 541.676   4
  -8   2  -4 1145.69 556.628   3
   8   2   5 16424.1 1287.62   4
  -8   2  -5 15038.9 1226.74   3
  -8  -2  -5 15266.7 1361.96   5
  -8   2  -5 16892.7 1319.62   5
  -8  -2  -6 7794.22 1044.15   5
  -8   2  -6 7545.59 927.251   5
   8   2   6 7706.76 984.214   4
  -8   2  -6 7371.63 949.557   3
   8   2   7 43614.0 2345.66   4
  -8   2  -7 39795.4 2051.22   3
  -8  -2  -7 47133.8 2468.76   5
  -8   2  -7 44226.1 2303.37   5
  -8  -2  -8 3001.20 835.016   5
   8   2   8 2532.72 732.890   4
  -8   2  -8 4426.40 933.248   1
  -8   2  -8 2704.04 596.886   3
   8   2   9 42122.8 2495.78   4
  -8   2  -9 43163.6 2121.01   3
  -8   2  -9 42164.4 2473.88   1
  -8  -2  -9 46707.7 2598.92   5
  -8  -2 -10 3379.59 961.799   5
   8   2  10 2268.73 797.832   4
  -8   2 -10 2635.25 794.434   1
  -8   2 -10 2435.61 566.699   3
  -8  -2 -11 3898.73 914.467   5
   8   2  11 3626.29 945.764   4
  -8  -2 -11 3347.19 913.197   1
  -8   2 -11 3514.58 850.291   1
   8   2  12 715.222 595.199   4
  -8  -2 -12 302.592 715.472   1
  -8   2 -12 324.990 667.348   1
   8   2  13 11119.0 1590.96   4
  -8  -2 -13 9779.57 1378.16   1
  -8   2 -13 11111.3 1450.37   1
  -8   2 -14 2064.26 971.427   1
   8   2  14 1303.43 753.922   4
  -8  -2 -14 2166.66 784.039   1
  -8  -2 -15 1162.41 727.396   1
  -8   3  14 1303.03 758.312   7
  -8  -3  14 287.902 606.892   6
  -8   3  13 897.991 654.591   7
  -8  -3  13-487.752 707.647   6
  -8   3  12 1126.52 675.228   7
  -8  -3  12 1241.92 671.213   6
  -8   3  12 945.694 523.560   6
  -8   3  11 25153.2 1992.38   7
  -8  -3  11 25204.5 1866.12   6
  -8   3  11 26402.7 1762.78   6
  -8   3  10 1333.24 617.971   7
  -8  -3  10-495.373 527.564   6
  -8   3  10 511.112 524.756   6
  -8   3   9 10243.5 1245.20   7
  -8   3   9 13089.8 1212.45   6
  -8   3   9 11765.0 997.334   3
  -8  -3   9 11441.2 1207.26   6
  -8  -3   8 3571.14 764.893   6
  -8   3   8 4670.73 784.549   6
  -8   3   8 6089.90 759.262   3
  -8  -3   7 1035.02 558.548   6
  -8   3   7 654.772 529.890   6
  -8   3   7 1227.19 443.873   3
  -8   3   6 906.441 470.942   7
  -8  -3   6 600.634 660.494   6
  -8   3   6 1477.90 573.935   6
  -8   3   6 964.592 441.304   3
  -8   3   5 78521.1 3047.92   7
  -8  -3   5 88775.8 3186.94   6
  -8   3   5 89055.9 3040.79   6
  -8   3   5 89681.6 3032.61   3
  -8   3   4 19289.7 1352.06   7
  -8  -3   4 24404.2 1586.00   6
  -8   3   4 24243.7 1484.85   3
  -8   3   4 21092.3 1127.12   5
  -8   3   3 1809.99 462.294   7
  -8  -3   3 2074.94 704.502   6
  -8   3   3 2207.15 568.772   3
  -8   3   3 1507.77 375.843   5
  -8   3   2 751.437 342.452   7
  -8  -3   2 891.067 631.790   6
  -8   3   2 759.308 522.351   3
  -8   3   2 478.676 318.796   5
  -8   3   1 68037.0 2397.70   7
  -8  -3   1 75482.2 2809.69   6
  -8   3   1 73046.8 2746.62   3
  -8  -3   1 65109.7 2645.11   5
  -8   3   1 72429.0 2286.51   5
  -8   3   0 132.405 395.759   5
  -8   3   0-253.248 271.049   7
   8   3   0 42.9132 272.023   4
  -8   3   0 437.318 489.316   3
  -8  -3   0 60.9200 493.350   5
   8   3   1 98205.9 2852.58   4
  -8   3  -1 90572.5 2625.51   7
  -8   3  -1 99245.9 3349.48   3
  -8  -3  -1 99926.8 3318.58   5
  -8   3  -1 91684.2 2885.33   5
   8   3   2 14716.1 1022.75   4
  -8   3  -2 14531.1 830.422   7
  -8   3  -2 14611.8 1276.72   3
  -8  -3  -2 16531.5 1261.98   5
  -8   3  -2 16349.6 1125.89   5
  -8   3  -3 4464.97 697.634   5
   8   3   3 4271.91 658.267   4
  -8   3  -3 5052.38 778.584   3
  -8  -3  -3 5116.16 880.601   5
  -8  -3  -4 10659.9 1138.99   5
   8   3   4 9802.35 984.939   4
  -8   3  -4 12228.2 1104.22   5
  -8   3  -4 10290.7 1045.07   3
   8   3   5 88514.2 3290.76   4
  -8   3  -5 93054.2 3304.30   3
  -8  -3  -5 92565.0 3433.08   5
  -8   3  -5 97999.6 3316.39   5
  -8  -3  -6 114.339 602.906   5
  -8   3  -6 464.186 427.388   5
   8   3   6 723.352 565.583   4
  -8   3  -6 848.404 580.918   3
  -8  -3  -7 8465.32 1180.37   5
   8   3   7 9597.37 1168.75   4
  -8   3  -7 7361.52 1009.11   1
  -8   3  -7 8187.50 983.316   3
  -8  -3  -8 3155.39 883.005   5
   8   3   8 3350.78 837.123   4
  -8   3  -8 2972.29 844.621   1
  -8   3  -8 2025.31 534.589   3
  -8  -3  -9 4710.09 958.316   5
   8   3   9 3157.35 789.775   4
  -8   3  -9 4593.12 934.569   1
  -8   3  -9 4437.09 729.061   3
   8   3  10 1525.42 755.546   4
  -8   3 -10 1307.90 697.956   1
   8   3  11 16667.5 1733.15   4
  -8  -3 -11 16829.3 1622.37   1
  -8   3 -11 13012.5 1531.15   1
  -8  -3 -11 17344.8 1707.33   5
   8   3  12 258.063 559.662   4
  -8  -3 -12-114.459 634.345   1
  -8   3 -12 491.581 661.085   1
  -8   3 -13 993.288 755.150   1
   8   3  13 1671.00 785.338   4
  -8  -3 -13 1768.46 748.920   1
  -8   3 -14 793.612 697.681   1
   8   3  14-1005.06 743.024   4
  -8  -3 -14 189.929 571.674   1
  -8  -3 -15 18134.7 1871.01   1
  -8   4  13 6012.84 1104.15   7
  -8  -4  13 6303.37 1176.54   6
  -8   4  12 6600.88 1056.34   7
  -8  -4  12 7584.46 1151.53   6
  -8   4  11 1042.43 691.496   7
  -8  -4  11 2169.57 843.993   6
  -8   4  10 29325.5 2102.82   7
  -8  -4  10 32009.4 2083.67   6
  -8   4  10 32422.7 1904.59   6
  -8   4   9 9635.08 1160.67   7
  -8   4   9 8868.05 907.438   3
  -8  -4   9 10438.8 1189.53   6
  -8   4   9 9010.62 1015.56   6
  -8   4   8 1427.70 513.457   3
  -8   4   8 951.570 572.670   7
  -8  -4   8 1763.78 608.235   6
  -8   4   8 2178.24 545.408   6
  -8   4   7 8975.57 1097.61   7
  -8   4   7 10685.1 1023.90   3
  -8  -4   7 10363.0 1147.70   6
  -8   4   7 10750.3 1008.74   6
  -8   4   6 12951.5 1233.01   7
  -8  -4   6 12605.9 1248.75   6
  -8   4   6 13913.7 1145.02   3
  -8   4   5 1948.36 555.755   7
  -8  -4   5 3259.48 717.194   6
  -8   4   5 2158.97 525.184   3
  -8   4   4 86109.9 3162.21   7
  -8  -4   4 93938.6 3289.65   6
  -8   4   4 91690.4 3155.37   3
  -8   4   3 87666.9 3111.67   7
  -8  -4   3 94422.7 3292.09   6
  -8   4   3 95322.0 3236.06   3
  -8   4   2 479.160 289.196   5
  -8   4   2 246.919 434.870   7
  -8  -4   2 375.037 503.586   6
  -8   4   1 6642.77 754.595   7
  -8  -4   1 7769.81 943.424   6
  -8   4   1 6413.14 628.801   5
  -8   4   1 7561.57 909.277   3
   8   4   0 33148.2 1579.30   4
  -8   4   0 29593.2 1486.40   7
  -8  -4   0 33092.3 1763.95   6
  -8   4   0 32769.6 1824.50   3
  -8  -4   0 32650.1 1848.14   5
  -8   4   0 30298.4 1394.26   5
   8   4   1 9842.25 891.154   4
  -8   4  -1 9277.33 791.418   7
  -8   4  -1 9180.95 817.630   5
  -8   4  -1 9519.18 1050.29   3
  -8  -4  -1 9611.35 1041.46   5
  -8   4  -2-143.606 305.955   5
  -8   4  -2-151.980 221.585   7
   8   4   2 455.630 453.914   4
  -8   4  -2 301.509 488.910   3
  -8  -4  -2 184.800 574.739   5
   8   4   3 121511. 3765.72   4
  -8   4  -3 120564. 3912.63   3
  -8  -4  -3 121654. 3931.99   5
  -8   4  -3 123430. 3582.11   5
   8   4   4 20327.3 1451.46   4
  -8   4  -4 21794.3 1516.67   3
  -8  -4  -4 20891.9 1541.39   5
  -8   4  -4 19591.8 1333.27   5
  -8  -4  -5 4608.05 828.428   5
   8   4   5 4339.88 724.309   4
  -8   4  -5 3959.40 763.726   3
  -8   4  -6 14133.7 1334.62   1
  -8   4  -6 17256.6 1368.47   3
  -8  -4  -6 14867.0 1397.76   5
   8   4   7 14173.4 1433.36   4
  -8   4  -7 14051.1 1374.44   1
  -8   4  -7 14451.8 1251.77   3
  -8  -4  -7 15519.6 1457.99   5
  -8   4  -8 5524.58 838.997   3
  -8  -4  -8 5303.93 964.766   5
   8   4   8 5412.57 1009.90   4
  -8   4  -8 5193.39 992.823   1
   8   4   9 13710.1 1468.42   4
  -8   4  -9 13518.8 1226.29   3
  -8   4  -9 16518.8 1594.42   1
  -8  -4  -9 12797.2 1419.82   5
  -8  -4 -10 14876.3 1566.14   5
   8   4  10 13513.8 1565.36   4
  -8   4 -10 12310.6 1383.47   1
  -8  -4 -11 79.8597 669.311   5
   8   4  11 248.447 600.343   4
  -8   4 -11 955.180 738.366   1
  -8   4 -12 1629.40 821.136   1
   8   4  12 1910.79 909.370   4
  -8  -4 -12 313.116 618.685   1
  -8   4 -13 7359.05 1320.77   1
   8   4  13 8490.41 1370.48   4
  -8  -4 -13 7684.20 1189.00   1
   8   4  14 5707.06 1181.08   4
  -8  -4 -14 4284.62 1004.86   1
  -8  -4 -15 1838.23 871.383   1
  -8   5  13 1285.53 622.950   7
  -8  -5  13 1073.61 631.590   6
  -8   5  12 24554.0 2087.09   7
  -8  -5  12 26152.2 2034.14   6
  -8   5  11-155.743 449.611   7
  -8  -5  11 560.773 537.275   6
  -8   5  10 2368.79 793.891   7
  -8  -5  10 1637.41 699.076   6
  -8   5   9 1873.33 556.934   3
  -8   5   9 1517.58 630.280   7
  -8  -5   9 495.465 507.770   6
  -8   5   8 42404.6 2508.45   7
  -8  -5   8 48743.9 2492.39   6
  -8   5   8 49798.4 2258.62   3
  -8   5   7 4412.52 724.036   3
  -8   5   7 3338.49 720.899   7
  -8  -5   7 2934.60 716.952   6
  -8   5   6 22753.6 1687.60   7
  -8  -5   6 21824.8 1601.52   6
  -8   5   6 19545.9 1393.51   3
  -8   5   5-551.601 407.202   3
  -8   5   5 676.187 574.608   7
  -8  -5   5 1095.70 620.291   6
  -8   5   4 12769.2 1192.80   7
  -8  -5   4 14861.3 1291.61   6
  -8   5   4 12714.0 1161.44   3
  -8   5   3 208.157 386.455   7
  -8  -5   3 422.079 514.025   6
  -8   5   3 697.489 550.119   3
  -8   5   2 79277.0 2932.79   7
  -8  -5   2 84527.4 3090.79   6
  -8   5   2 81532.0 3038.99   3
  -8   5   1 1781.04 471.791   7
  -8  -5   1 2629.49 651.267   6
  -8   5   1 3528.22 676.642   3
  -8   5   0 584.899 380.650   7
   8   5   0 1194.52 437.907   4
  -8  -5   0-148.488 461.578   6
  -8  -5   0 1295.52 622.952   5
  -8   5   0 473.324 441.396   3
  -8   5  -1 3826.21 534.812   5
  -8   5  -1 4070.28 597.062   7
   8   5   1 3706.79 661.659   4
  -8  -5  -1 3864.53 781.539   5
  -8   5  -1 4082.68 814.464   3
   8   5   2 35931.6 1876.18   4
  -8   5  -2 34091.8 1950.19   3
  -8  -5  -2 34681.7 1935.17   5
  -8   5  -2 33877.3 1536.13   5
   8   5   3 9510.80 1022.44   4
  -8  -5  -3 10519.5 1100.86   5
  -8   5  -3 8991.11 1009.30   3
   8   5   4 14669.2 1305.07   4
  -8   5  -4 15463.1 1261.43   1
  -8   5  -4 11184.1 1146.61   3
  -8  -5  -4 11764.0 1202.14   5
  -8   5  -5 5779.69 910.628   3
  -8  -5  -5 5890.42 958.019   5
  -8   5  -5 3568.53 716.119   1
   8   5   5 5654.42 895.917   4
   8   5   6 13562.5 1409.62   4
  -8   5  -6 13301.8 1291.75   1
  -8   5  -6 13967.1 1258.65   3
  -8  -5  -6 12308.7 1285.63   5
  -8   5  -7 3001.46 678.533   3
  -8  -5  -7 3164.87 807.737   5
   8   5   7 2417.93 818.980   4
  -8   5  -7 2501.07 715.591   1
   8   5   8 39292.2 2477.20   4
  -8   5  -8 40121.8 2183.34   3
  -8   5  -8 38603.2 2316.27   1
  -8  -5  -8 40140.9 2403.21   5
  -8   5  -9 9569.41 1105.66   3
  -8  -5  -9 8175.37 1175.65   5
   8   5   9 8547.53 1247.47   4
  -8   5  -9 7376.66 1157.49   1
  -8   5 -10 426.539 792.286   1
  -8  -5 -10 751.352 657.958   5
   8   5  10 1150.83 798.324   4
  -8  -5 -11 345.743 661.368   5
  -8   5 -11-932.900 745.772   1
   8   5  11 138.313 578.516   4
   8   5  12 15317.2 1771.68   4
  -8   5 -12 16884.2 1816.98   1
  -8  -5 -12 14964.6 1520.97   1
  -8  -5 -12 18165.8 1867.61   5
   8   5  13 1603.35 717.589   4
  -8   5 -13 1689.99 866.842   1
  -8  -5 -13 749.690 624.075   1
  -8  -5 -14 4287.48 895.794   1
  -8   6  12 4488.96 1080.44   7
  -8  -6  12 2359.71 901.958   6
  -8   6  11-233.407 556.857   7
  -8  -6  11 610.505 567.208   6
  -8   6  10 17829.7 1715.60   7
  -8  -6  10 19944.4 1741.20   6
  -8   6   9-145.041 468.504   3
  -8   6   9-434.104 507.060   7
  -8  -6   9 581.552 678.342   6
  -8   6   8 8431.64 997.142   3
  -8   6   8 4839.19 872.930   7
  -8  -6   8 6656.31 1051.35   6
  -8   6   7 4980.83 817.699   3
  -8   6   7 4071.19 849.258   7
  -8  -6   7 4962.83 921.890   6
  -8   6   6 25609.3 1872.91   7
  -8  -6   6 29332.2 1875.41   6
  -8   6   6 28474.9 1776.64   3
  -8   6   5-30.9559 383.873   3
  -8   6   5-387.630 502.705   7
  -8  -6   5 1036.40 627.009   6
  -8   6   4 9301.77 1094.72   7
  -8  -6   4 11557.3 1177.12   6
  -8   6   4 13464.6 1234.10   3
  -8   6   3 4686.51 811.128   3
  -8   6   3 4937.87 828.221   7
  -8  -6   3 5618.66 907.735   6
  -8   6   2 1954.68 683.583   3
  -8   6   2 1309.53 427.444   7
  -8  -6   2 1375.10 553.794   6
  -8   6   1 809.085 579.703   3
  -8   6   1-373.284 373.398   7
  -8  -6   1-261.738 479.273   6
  -8  -6   1 114.642 564.394   5
  -8   6   0 49049.3 2216.92   7
  -8  -6   0 46279.8 2149.48   6
  -8   6   0 46027.4 2325.90   3
  -8  -6   0 48010.1 2334.80   5
  -8   6  -1 1142.56 613.748   3
  -8   6  -1 904.649 419.671   7
   8   6   1 476.432 424.794   4
  -8  -6  -1 565.622 522.970   5
  -8   6  -2 748.469 623.165   3
   8   6   2 422.391 486.335   4
  -8   6  -2 614.588 434.508   1
  -8  -6  -2-101.641 488.736   5
  -8   6  -3 7573.81 1000.46   3
  -8   6  -3 7217.21 844.439   1
   8   6   3 9632.20 1107.91   4
  -8  -6  -3 9614.47 1099.89   5
   8   6   4 54123.9 2675.41   4
  -8   6  -4 54978.2 2397.31   1
  -8   6  -4 52086.3 2564.22   3
  -8  -6  -4 52685.8 2547.35   5
  -8  -6  -5 294.291 561.449   5
   8   6   5-108.649 460.359   4
  -8   6  -5 106.806 436.064   1
   8   6   6 25714.0 1934.14   4
  -8   6  -6 22348.7 1709.34   3
  -8   6  -6 26368.7 1776.32   1
  -8  -6  -6 26164.0 1856.53   5
  -8  -6  -7 1379.08 623.710   5
  -8   6  -7 3008.04 762.525   3
   8   6   7 1619.63 645.203   4
  -8   6  -7 3355.61 807.040   1
   8   6   8 11058.3 1345.82   4
  -8   6  -8 10276.5 1199.44   3
  -8   6  -8 11096.5 1283.56   1
  -8  -6  -9 177.521 601.877   5
  -8   6  -9 434.103 457.640   3
  -8   6  -9-21.5029 545.370   1
   8   6   9-615.532 571.743   4
   8   6  10 36015.1 2571.86   4
  -8   6 -10 34381.7 2401.08   1
  -8  -6 -10 40080.9 2557.47   5
  -8  -6 -11 887.188 658.920   5
   8   6  11-158.723 632.958   4
  -8   6 -11-483.854 805.638   1
  -8  -6 -12 11064.4 1447.78   5
   8   6  12 6920.21 1215.64   4
  -8  -6 -12 8842.23 1185.14   1
  -8   6 -12 7709.30 1371.69   1
  -8   7  11 2645.86 803.616   7
  -8  -7  11 3990.10 979.022   6
  -8   7  10 479.637 578.784   7
  -8  -7  10 446.044 601.005   6
  -8   7   9 1263.45 536.998   3
  -8   7   9 2476.56 742.122   7
  -8  -7   9 2157.87 728.672   6
  -8   7   8 2794.04 664.477   3
  -8   7   8 3884.54 888.624   7
  -8   7   7 8278.92 1045.29   3
  -8   7   7 9276.82 1242.64   7
  -8  -7   7 9572.48 1193.44   6
  -8   7   6 5268.55 845.094   3
  -8   7   6 5992.80 1007.45   7
  -8  -7   6 2995.74 775.800   6
  -8   7   5 10018.3 1235.66   7
  -8  -7   5 13384.2 1301.56   6
  -8   7   5 10527.4 1152.93   3
  -8   7   4 7476.63 1039.20   3
  -8   7   4 5305.00 927.528   7
  -8  -7   4 6112.33 966.338   6
  -8   7   3 3510.07 773.811   3
  -8   7   3 1827.81 565.171   7
  -8  -7   3 1787.88 565.294   6
  -8   7   2 4647.68 857.059   3
  -8   7   2 2957.95 720.631   7
  -8  -7   2 5080.10 922.649   6
  -8   7   1 43373.1 2259.57   7
  -8  -7   1 44929.4 2219.44   6
  -8   7   1 43964.3 2353.78   3
  -8  -7   1 43698.0 2331.86   5
  -8   7   0 1212.48 632.883   3
  -8   7   0-325.165 445.922   7
  -8  -7   0-407.497 431.938   6
  -8  -7   0 768.224 591.828   5
   8   7   1 31470.5 1964.43   4
  -8   7  -1 30854.7 1982.40   3
  -8  -7  -1 33226.5 1989.56   5
   8   7   2 15452.0 1421.83   4
  -8   7  -2 17012.9 1487.74   3
  -8  -7  -2 15242.0 1367.12   5
  -8   7  -3 5422.56 938.835   3
   8   7   3 5108.35 949.695   4
  -8   7  -3 5163.33 708.042   1
  -8  -7  -3 4894.94 918.184   5
  -8   7  -4 1780.41 739.968   3
   8   7   4 158.150 566.632   4
  -8   7  -4 905.021 510.345   1
  -8  -7  -4 274.250 503.245   5
   8   7   5 40543.0 2485.71   4
  -8   7  -5 39107.6 2322.30   3
  -8   7  -5 36458.9 2032.84   1
  -8  -7  -5 39893.0 2280.06   5
  -8   7  -6 7064.30 956.593   1
  -8  -7  -6 5724.02 960.364   5
  -8   7  -6 7625.70 1093.95   3
   8   7   6 7292.33 1181.53   4
  -8   7  -7 13422.4 1410.32   3
   8   7   7 13504.4 1565.73   4
  -8   7  -7 16103.2 1479.72   1
  -8  -7  -7 14900.5 1499.25   5
  -8  -7  -8 6797.07 1074.55   5
  -8   7  -8 5965.64 945.151   3
  -8   7  -8 4544.87 944.569   1
   8   7   8 7026.07 1191.56   4
  -8  -7  -9 5443.30 1002.33   5
  -8   7  -9 6232.57 997.149   3
  -8   7  -9 5319.77 1003.71   1
   8   7   9 4522.53 1012.87   4
  -8  -7 -10 1532.43 797.863   5
   8   7  10 1026.26 760.460   4
  -8   7 -10 397.538 641.687   1
   8   7  11 13512.4 1734.93   4
  -8   7 -11 14839.7 1686.39   1
  -8  -7 -11 14244.8 1637.73   5
  -8  -7 -12 8676.38 1327.55   5
   8   7  12 7785.07 1335.47   4
  -8   7 -12 7050.17 1273.91   1
  -8  -8  11 2954.07 893.944   6
  -8   8  10-229.504 712.177   7
  -8  -8  10 966.662 647.047   6
  -8   8   9 8508.28 1301.04   7
   8   8  -9 9016.54 1241.17   2
  -8  -8   9 7795.45 1154.90   6
  -8   8   8 2769.81 740.125   3
  -8   8   8 2458.26 811.752   7
   8   8  -8 2907.48 905.329   2
  -8  -8   8 2365.66 840.452   6
  -8   8   7 5674.51 964.818   3
  -8   8   7 6221.43 1085.94   7
  -8  -8   7 6725.59 1027.85   6
  -8   8   6 126.862 552.713   3
  -8   8   6 1259.27 782.557   7
  -8  -8   6 114.036 574.251   6
  -8   8   5 2429.22 720.860   3
  -8   8   5 2842.32 828.926   7
  -8  -8   5 2315.65 744.120   6
  -8   8   4-204.995 505.514   3
  -8   8   4 124.644 497.633   7
  -8  -8   4-33.5716 554.927   6
  -8   8   3 32077.5 2114.94   7
  -8  -8   3 30196.6 1852.23   6
  -8   8   3 26561.8 1875.72   3
  -8   8   2 84.9576 502.744   3
  -8   8   2 822.174 600.991   7
  -8  -8   2 499.066 478.975   6
  -8   8   1 15187.1 1394.36   7
  -8  -8   1 14397.7 1280.83   6
  -8   8   1 16379.2 1509.59   3
  -8  -8   1 13887.4 1340.22   5
  -8  -8   0-68.6419 388.992   6
  -8  -8   0 153.753 538.877   5
  -8   8  -1 41817.7 2404.26   3
  -8  -8  -1 41000.9 2257.82   5
  -8   8  -2 495.506 644.771   3
   8   8   2 673.347 591.533   4
  -8  -8  -2 54.1829 493.420   5
   8   8   3 40606.6 2491.99   4
  -8   8  -3 34278.2 2210.05   3
  -8  -8  -3 33732.6 2072.97   5
  -8   8  -4-871.445 719.532   3
   8   8   4 51.2178 547.590   4
  -8  -8  -4 55.2073 415.275   5
  -8  -8  -5 1230.22 563.384   5
  -8   8  -5 525.555 595.381   3
   8   8   5 1152.44 773.244   4
  -8  -8  -6-767.310 619.122   5
  -8   8  -6-203.958 561.802   3
  -8   8  -6-25.8859 488.712   1
   8   8   6 145.480 659.263   4
   8   8   7 18468.9 1867.20   4
  -8   8  -7 20405.6 1833.94   3
  -8  -8  -7 20198.7 1734.24   5
  -8   8  -7 19906.8 1631.81   1
  -8  -8  -8 365.305 577.655   5
  -8   8  -8-474.358 553.574   3
   8   8   8-51.8666 539.251   4
   8   8   8 1557.22 746.472   2
  -8   8  -8-104.463 583.492   1
  -8   8  -9 15485.2 1611.59   1
   8   8   9 16850.6 1817.19   4
  -8   8  -9 14603.2 1539.97   3
  -8  -8  -9 15626.2 1617.44   5
  -8  -8 -10 699.010 746.953   5
   8   8  10-310.749 768.495   4
  -8   8 -10-284.807 570.882   1
  -8  -8 -11 7387.03 1169.62   5
  -8   8 -11 7013.28 1266.19   1
   8   8  11 5898.45 1175.54   4
  -8  -8 -12 1511.09 669.453   5
  -8  -9  10 1229.52 726.182   6
  -8   9   9 4387.77 1051.16   7
  -8  -9   9 4509.14 1010.96   6
  -8   9   8 5480.86 1020.05   3
  -8   9   8 6247.59 1165.85   7
   8   9  -8 6244.42 1127.03   2
  -8  -9   8 6589.54 1096.13   6
  -8   9   7 4768.26 978.980   3
  -8   9   7 4833.63 1066.81   7
   8   9  -7 6168.16 1170.92   2
  -8  -9   7 6099.84 1042.07   6
  -8   9   6 1067.95 591.840   3
  -8   9   6 1050.06 782.749   7
   8   9  -6 1115.72 777.771   2
  -8  -9   6 1043.10 660.082   6
  -8   9   5 21440.7 1924.83   7
  -8  -9   5 22619.2 1720.45   6
  -8   9   5 19162.7 1676.70   3
   8   9  -5 16497.2 1767.87   2
  -8   9   4 3472.34 816.506   3
  -8   9   4 5876.71 1077.39   7
  -8  -9   4 6645.31 1026.15   6
  -8   9   3 1016.52 653.949   3
  -8   9   3 2602.99 827.232   7
  -8  -9   3 802.792 536.212   6
  -8   9   2 3470.37 853.772   3
  -8   9   2 6178.59 1099.90   7
  -8  -9   2 3852.11 755.426   6
  -8   9   1 12900.8 1406.29   3
  -8  -9   1 13974.7 1379.73   5
  -8   9   0 647.156 669.452   3
  -8  -9   0 1210.34 574.248   5
  -8   9  -1 18619.1 1769.41   3
  -8  -9  -1 17382.7 1519.41   5
  -8   9  -2 7670.43 1141.36   3
  -8  -9  -2 7470.38 1052.90   5
  -8   9  -3 472.764 744.973   3
   8   9   3-8.89182 699.765   4
  -8  -9  -3 617.388 575.255   5
  -8  -9  -4 1228.12 560.090   5
  -8   9  -4 2562.78 888.247   3
   8   9   4 1030.61 679.115   4
   8   9   5 19732.1 1953.64   4
  -8   9  -5 19923.2 1821.80   3
   8   9   5 17588.5 1721.23   2
  -8  -9  -5 20233.9 1673.37   5
  -8  -9  -6 2307.76 755.639   5
  -8   9  -6 2648.10 821.045   3
   8   9   6 3989.35 944.705   2
   8   9   6 3633.16 995.296   4
  -8  -9  -7 5637.08 949.492   5
  -8   9  -7 6335.10 1163.32   3
   8   9   7 6367.41 1105.57   2
   8   9   7 7202.43 1356.38   4
  -8  -9  -8 6289.72 1077.82   5
  -8   9  -8 6613.63 1187.81   3
   8   9   8 5590.05 1035.33   2
   8   9   8 5861.94 1278.70   4
  -8  -9  -9 3119.41 809.701   5
  -8   9  -9 2270.13 761.207   3
   8   9   9 4234.47 1139.23   4
  -8  -9 -10 656.339 594.572   5
  -8  -9 -11 2150.71 843.433   5
  -8   9 -11-378.816 694.374   1
  -8 -10   9 1253.52 658.027   6
  -8  10   8 2637.53 792.890   3
   8  10  -8 1902.54 937.752   2
  -8 -10   8 3660.84 899.267   6
  -8  10   7 2012.66 688.867   3
   8  10  -7 3226.23 1034.02   2
  -8  10   7 2715.88 908.759   7
  -8 -10   7 2448.95 756.919   6
  -8  10   6 8712.69 1252.33   3
  -8  10   6 8913.79 1389.28   7
   8  10  -6 5456.49 1020.41   2
  -8 -10   6 9483.94 1223.22   6
  -8  10   5 544.148 597.110   3
  -8  10   5 1649.28 884.801   7
   8  10  -5-108.781 719.262   2
  -8 -10   5 853.298 566.263   6
  -8  10   4 10565.0 1428.84   3
  -8  10   4 12444.8 1598.73   7
   8  10  -4 11990.9 1529.55   2
  -8  10   3 5663.01 1069.40   3
   8  10  -3 5506.83 1137.78   2
  -8  10   2 25.8968 522.618   3
   8  10  -2 291.090 726.443   2
  -8 -10   2 307.936 587.167   5
  -8  10   1 3498.60 949.441   3
   8  10  -1 1449.80 824.035   2
  -8 -10   1 1581.12 623.053   5
  -8  10   0 2337.70 831.554   3
   8  10   0 2562.29 849.089   2
  -8 -10   0 3915.83 797.477   5
  -8  10  -1-260.097 743.720   3
   8  10   1-108.966 641.604   2
  -8 -10  -1 921.127 582.144   5
  -8  10  -2 3594.41 921.081   3
   8  10   2 6358.27 1193.99   2
  -8 -10  -2 4848.50 913.397   5
  -8  10  -3 7271.44 1230.46   3
   8  10   3 7033.79 1232.42   2
  -8 -10  -3 6777.06 1012.31   5
  -8 -10  -4 3555.11 829.423   5
  -8  10  -4 2213.42 809.206   3
   8  10   4 2558.65 859.122   2
   8  10   4 2465.34 838.408   4
  -8 -10  -5-594.646 525.401   5
  -8  10  -5 295.604 603.767   3
   8  10   5 1110.74 644.171   2
   8  10   5-166.705 591.314   4
  -8 -10  -6 214.096 560.924   5
  -8  10  -6 2365.11 1016.26   3
   8  10   6 1156.60 648.616   2
   8  10   6 616.527 709.630   4
  -8 -10  -7 1301.66 634.887   5
  -8  10  -7 1814.05 768.153   3
   8  10   7 455.291 606.737   2
   8  10   7 293.888 651.018   4
  -8 -10  -8 2950.93 870.345   5
  -8  10  -8 4001.73 1066.24   3
   8  10   8 941.808 667.404   2
   8  10   8 1343.62 746.338   4
  -8  10  -9 564.464 615.684   3
  -8  11   6 6735.13 1191.88   3
  -8  11   5 1375.86 791.510   3
   8  11  -5 138.349 658.800   2
  -8  11   4 1142.82 657.326   3
   8  11  -4-427.196 699.402   2
  -8  11   3 817.760 816.965   3
   8  11  -3-459.982 793.295   2
  -8 -11   3-408.756 503.489   5
  -8  11   2 15597.7 1709.02   3
   8  11  -2 10338.8 1480.63   2
  -8 -11   2 13311.3 1452.35   5
  -8  11   1 2319.65 770.590   3
   8  11  -1 144.240 685.476   2
  -8 -11   1 1052.89 664.335   5
  -8  11   0 1093.20 649.816   3
   8  11   0 1346.72 793.678   2
  -8 -11   0 137.748 426.584   5
  -8  11  -1-610.648 679.697   3
   8  11   1-808.545 764.897   2
  -8  11  -2 2390.73 980.633   3
   8  11   2 2160.62 885.037   2
  -8 -11  -2 3253.40 821.115   5
  -8  11  -3 191.276 610.456   3
   8  11   3 670.438 799.417   2
  -8 -11  -3-161.098 505.778   5
  -8 -11  -4 908.536 606.067   5
  -8  11  -4 1482.74 864.453   3
   8  11   4 86.5175 684.230   2
  -8  11  -5 263.679 811.127   3
   8  11   5 531.072 711.982   2
   8  11   5 825.317 799.324   4
  -8  11  -6 2707.80 952.148   3
  -8 -12   4 2499.66 770.641   5
  -8 -12   3 4326.20 886.892   5
  -8 -12   2-177.083 471.530   5
  -8 -12   1 1319.87 611.982   5
  -8 -12   0 3111.72 847.636   5
  -9   0  14 14370.7 1571.34   6
  -9   0  13 1663.04 693.355   6
  -9   0  12 37955.0 2331.77   6
  -9   0  11 930.821 734.099   6
  -9   0  10 993.836 641.393   6
  -9   0   9 753.049 571.501   6
  -9   0   8 80090.8 3242.96   6
  -9   0   7-295.522 527.006   6
  -9   0   6 11256.6 1220.14   6
  -9   0   5-418.689 619.079   6
  -9   0   4 17725.6 1435.70   6
  -9   0   3 1246.79 540.150   6
  -9   0   2 71849.4 2639.88   5
  -9   0   1 62.0115 457.811   5
  -9   0   0 3442.20 700.010   5
  -9   0  -1 92.0820 443.632   5
   9   0   2 53595.1 1852.65   4
  -9   0  -2 53463.3 2298.61   5
  -9   0  -3-195.021 475.886   5
   9   0   3 344.657 423.230   4
   9   0   4 13983.9 1137.69   4
  -9   0  -4 13352.2 1217.61   5
  -9   0  -5 1444.66 569.102   5
  -9   0  -6 8312.24 1079.89   5
  -9   0  -7 287.141 626.684   5
  -9   0  -8 70037.4 3264.90   5
  -9   0  -9 1030.30 723.322   5
  -9   0 -10 3454.80 908.761   5
  -9   0 -10 1544.04 819.979   1
  -9   0 -11 435.608 748.972   1
  -9   0 -12 12801.4 1573.96   1
  -9   0 -13 825.408 800.961   1
  -9   0 -14 10233.5 1477.10   1
  -9   1  15 2797.99 821.791   6
  -9  -1  14 8187.29 1225.85   6
  -9   1  14 8094.60 1175.05   6
  -9  -1  13 3114.05 834.505   6
  -9   1  13 3630.43 961.910   6
  -9  -1  12 7808.44 1122.42   6
  -9   1  12 9422.40 1200.25   6
  -9  -1  11 60.2441 538.389   6
  -9   1  11 550.904 591.211   6
  -9  -1  10 29145.2 1985.94   6
  -9   1  10 33921.8 2091.36   6
  -9   1   9 9341.18 965.249   3
  -9  -1   9 9679.77 1211.89   6
  -9   1   9 6933.22 944.479   6
  -9  -1   8 2452.45 782.854   6
  -9   1   8 2814.05 705.312   6
  -9   1   8 3433.65 633.207   3
  -9  -1   7 53811.1 2555.47   6
  -9   1   7 50800.4 2498.45   6
  -9  -1   6 25698.9 1753.87   6
  -9   1   6 25192.6 1755.18   6
  -9  -1   5 67.6687 544.830   6
  -9   1   5 385.439 535.224   6
  -9  -1   4 16778.0 1411.13   6
  -9   1   4 19001.5 1453.41   6
  -9  -1   3 30114.6 1872.54   6
  -9   1   3 27638.9 1516.98   5
  -9  -1   2 2706.42 676.959   6
  -9  -1   2 1691.39 525.530   5
  -9   1   2 3155.38 580.061   5
  -9  -1   1 31746.1 1726.73   5
  -9   1   1 31134.5 1589.01   5
  -9  -1   0 58318.4 2372.46   5
  -9   1   0 56485.5 2228.75   5
  -9  -1  -1 551.425 439.844   5
  -9   1  -1 1001.36 467.359   5
  -9   1  -2 692.694 469.320   5
   9   1   2 175.002 223.190   4
  -9  -1  -2 43.9521 437.122   5
   9   1   3 59842.9 2193.67   4
  -9  -1  -3 60001.6 2528.56   5
  -9   1  -3 56365.3 2445.87   5
   9   1   4 25854.1 1494.01   4
  -9  -1  -4 24264.3 1637.59   5
  -9   1  -4 22855.4 1568.45   5
  -9  -1  -5 987.944 627.764   5
  -9   1  -5 396.944 496.159   5
   9   1   5 2278.72 667.677   4
   9   1   6 32212.8 1925.17   4
  -9  -1  -6 29985.8 1979.85   5
  -9   1  -6 30140.1 1931.41   5
  -9  -1  -7 3690.41 870.398   5
  -9   1  -7 5703.90 941.025   5
   9   1   7 3782.10 846.572   4
  -9  -1  -8 6076.16 1125.37   5
  -9   1  -8 6138.15 1020.99   5
   9   1   8 5352.02 1011.12   4
  -9   1  -8 5491.80 857.129   3
  -9  -1  -9 1789.84 676.491   5
  -9   1  -9 722.033 585.340   5
   9   1   9 2952.71 949.600   4
  -9   1  -9 962.168 506.198   3
   9   1  10 33963.7 2366.86   4
  -9   1 -10 38126.4 2487.79   1
  -9  -1 -10 42267.3 2627.27   5
   9   1  11 2827.07 883.834   4
  -9  -1 -11 1243.12 859.501   1
  -9   1 -11 2416.16 874.662   1
   9   1  12 10753.4 1543.46   4
  -9  -1 -12 8921.42 1304.81   1
  -9   1 -12 9909.11 1418.04   1
   9   1  13 5323.36 1190.75   4
  -9  -1 -13 3662.10 1112.28   1
  -9   1 -13 2694.48 954.342   1
   9   1  14 6536.59 1404.11   4
  -9  -1 -14 5622.50 1223.05   1
  -9  -2  14-482.748 679.061   6
  -9   2  14 2485.69 749.348   6
  -9  -2  13-66.8546 484.164   6
  -9   2  13-125.444 619.393   6
  -9  -2  12 2201.94 784.185   6
  -9   2  12 1731.78 718.513   6
  -9  -2  11 9168.75 1239.14   6
  -9   2  11 11856.7 1301.12   6
  -9  -2  10 1300.53 702.900   6
  -9   2  10 43.2668 473.882   6
  -9  -2   9 10734.3 1233.99   6
  -9   2   9 9096.13 1177.55   6
  -9   2   9 9137.49 955.158   3
  -9  -2   8 2120.84 687.878   6
  -9   2   8 737.622 666.998   6
  -9   2   8 1074.36 458.218   3
  -9  -2   7 13493.3 1310.47   6
  -9   2   7 13633.6 1302.30   6
  -9   2   7 13317.4 1164.20   3
  -9   2   6 3746.90 776.445   6
  -9   2   6 5195.65 765.134   3
  -9  -2   5 116813. 3912.14   6
  -9   2   5 111006. 3723.51   6
  -9  -2   4 17839.5 1433.30   6
  -9   2   4 15881.7 1311.55   3
  -9   2   4 14677.1 1069.11   5
  -9  -2   3 17009.6 1431.70   6
  -9   2   3 17096.6 1120.25   5
  -9  -2   2 1080.01 559.359   6
  -9  -2   2 1591.13 585.630   5
  -9   2   2 2556.23 533.511   5
  -9   2   1 69410.0 2344.28   7
  -9  -2   1 63337.1 2639.36   5
  -9   2   1 65551.0 2332.02   5
  -9   2   0 6864.14 664.348   7
  -9  -2   0 5828.43 833.090   5
  -9   2   0 6999.74 758.785   5
  -9   2  -1 100795. 2739.47   7
  -9  -2  -1 97911.5 3355.34   5
  -9   2  -1 104543. 3242.19   5
   9   2   2 16384.4 1031.92   4
  -9  -2  -2 17358.1 1342.94   5
  -9   2  -2 18163.8 1305.04   5
  -9   2  -3 2816.00 628.336   5
   9   2   3 2363.12 486.261   4
  -9  -2  -3 1878.36 619.950   5
  -9  -2  -4 5365.50 879.472   5
  -9   2  -4 6853.12 893.187   5
   9   2   4 6133.18 793.003   4
  -9   2  -4 4967.78 824.854   3
   9   2   5 60494.6 2580.09   4
  -9   2  -5 55028.0 2597.00   3
  -9  -2  -5 58575.5 2751.49   5
   9   2   6 14403.4 1284.35   4
  -9   2  -6 13394.3 1233.44   3
  -9  -2  -6 13432.9 1374.71   5
  -9   2  -6 15157.2 1355.72   5
  -9  -2  -7 8213.34 1153.16   5
  -9   2  -7 10027.6 1183.00   5
   9   2   7 7245.45 1018.25   4
  -9   2  -7 6633.44 912.791   3
  -9  -2  -8 10128.8 1343.22   5
  -9   2  -8 6919.05 1067.16   5
   9   2   8 8193.58 1163.15   4
  -9   2  -8 7513.44 969.082   3
  -9  -2  -9 13819.7 1550.76   5
   9   2   9 10807.4 1353.19   4
  -9   2  -9 14461.1 1524.40   1
  -9   2  -9 12310.1 1184.65   3
  -9  -2 -10 2765.96 934.849   5
   9   2  10 2072.31 862.238   4
  -9   2 -10 2693.10 868.003   1
  -9  -2 -11 16110.2 1754.62   5
   9   2  11 15066.3 1664.90   4
  -9  -2 -11 15732.1 1633.58   1
  -9   2 -11 14785.3 1640.28   1
   9   2  12 6382.05 1180.87   4
  -9  -2 -12 7587.33 1329.91   1
  -9   2 -12 6596.69 1316.43   1
   9   2  13 6220.95 1285.39   4
  -9  -2 -13 6610.59 1248.61   1
  -9   2 -13 5354.70 1122.16   1
   9   2  14 3528.94 1010.12   4
  -9  -2 -14 4193.09 1089.22   1
  -9   3  13 5175.11 1052.98   7
  -9  -3  13 6337.33 1092.61   6
  -9   3  12-68.6009 592.849   7
  -9  -3  12 429.934 687.621   6
  -9   3  12 560.426 538.614   6
  -9   3  11 2789.88 745.390   7
  -9  -3  11 2518.76 794.507   6
  -9   3  11 2798.90 817.585   6
  -9   3  10 2454.84 782.355   7
  -9  -3  10 2419.69 732.269   6
  -9   3  10 2051.01 685.359   6
  -9   3   9 25085.4 1874.08   7
  -9  -3   9 23576.7 1752.30   6
  -9   3   9 24249.7 1744.74   6
  -9   3   9 22306.4 1478.54   3
  -9   3   8 991.440 633.235   7
  -9  -3   8 690.181 689.387   6
  -9   3   8-8.28854 465.009   6
  -9   3   8 1245.39 514.216   3
  -9   3   7 18241.5 1501.24   7
  -9  -3   7 18223.8 1524.39   6
  -9   3   7 16106.3 1376.27   6
  -9   3   7 17713.4 1339.66   3
  -9   3   6-482.178 394.761   7
  -9  -3   6 750.972 635.465   6
  -9   3   6 307.057 465.318   6
  -9   3   6 803.518 536.411   3
  -9   3   5 352.922 439.123   7
  -9  -3   5 67.5731 532.461   6
  -9   3   5-134.892 334.558   5
  -9   3   5 617.243 511.461   3
  -9   3   4 623.213 391.889   7
  -9  -3   4 911.266 626.528   6
  -9   3   4 251.322 436.443   3
  -9   3   4-129.236 264.894   5
  -9   3   3 111044. 3540.51   7
  -9  -3   3 117451. 3965.87   6
  -9   3   3 114005. 3793.15   3
  -9   3   3 115160. 3188.25   5
  -9   3   2 1915.19 482.133   7
  -9  -3   2 1218.20 695.292   6
  -9   3   2 1314.03 469.629   3
  -9   3   2 967.436 384.290   5
  -9   3   1 26359.1 1443.15   7
  -9  -3   1 32396.7 1850.26   6
  -9   3   1 29282.6 1790.60   3
  -9  -3   1 29928.0 1772.08   5
  -9   3   1 30486.0 1472.40   5
  -9   3   0 4171.08 635.650   5
  -9   3   0 4188.39 576.506   7
  -9   3   0 4091.38 702.603   3
   9   3   1 31362.3 1441.78   4
  -9   3  -1 26687.6 1281.27   7
  -9   3  -1 28510.5 1790.58   3
  -9  -3  -1 30689.3 1782.27   5
  -9   3  -1 27117.6 1490.99   5
  -9   3  -2 1905.47 505.619   5
   9   3   2 1783.83 413.828   4
  -9   3  -2 1549.81 580.208   3
  -9  -3  -2 1915.78 703.048   5
   9   3   3 101415. 3259.63   4
  -9   3  -3 100390. 3635.50   3
  -9  -3  -3 107930. 3681.36   5
  -9   3  -3 105344. 3453.72   5
  -9  -3  -4 349.993 555.557   5
  -9   3  -4-178.938 395.895   5
   9   3   4-25.8975 363.273   4
  -9   3  -4 635.813 551.069   3
  -9  -3  -5 1023.36 643.457   5
  -9   3  -5 1385.05 600.106   5
   9   3   5 1277.80 520.889   4
  -9   3  -5 1360.93 549.509   3
  -9  -3  -6 154.584 612.545   5
  -9   3  -6 1363.45 614.158   5
   9   3   6 1888.41 682.086   4
  -9   3  -6 79.3780 501.571   3
   9   3   7 49034.0 2576.21   4
  -9   3  -7 48732.5 2449.71   3
  -9  -3  -7 46992.0 2636.13   5
  -9  -3  -8 2276.00 852.510   5
   9   3   8 1620.89 683.880   4
  -9   3  -8 935.123 704.779   1
  -9   3  -8 862.192 545.366   3
   9   3   9 13155.8 1485.90   4
  -9   3  -9 14084.1 1308.29   3
  -9   3  -9 13895.1 1502.66   1
  -9  -3  -9 14940.3 1614.77   5
  -9  -3 -10 2485.69 837.139   5
   9   3  10 2051.45 665.859   4
  -9   3 -10 2645.84 885.572   1
   9   3  11 14688.7 1668.05   4
  -9   3 -11 16233.0 1764.89   1
  -9  -3 -11 16614.4 1829.98   5
   9   3  12 1188.03 814.170   4
  -9  -3 -12 385.395 693.386   1
  -9   3 -12-79.9792 814.050   1
  -9   3 -13 13253.8 1685.65   1
   9   3  13 11179.0 1576.47   4
  -9  -3 -13 11611.4 1508.80   1
  -9  -3 -14-275.305 768.386   1
  -9   4  13-46.4184 611.088   7
  -9  -4  13 750.222 603.474   6
  -9   4  12 10061.5 1391.01   7
  -9  -4  12 8854.76 1300.96   6
  -9   4  11 9109.41 1247.81   7
  -9  -4  11 5846.55 998.184   6
  -9   4  10-310.167 494.697   7
  -9  -4  10-337.263 500.563   6
  -9   4  10 331.379 431.179   6
  -9   4   9 2774.41 602.883   3
  -9   4   9 3681.25 817.801   7
  -9  -4   9 1899.47 731.247   6
  -9   4   9 3898.95 711.272   6
  -9   4   8 4695.47 735.765   3
  -9   4   8 6568.96 998.686   7
  -9  -4   8 4041.83 805.540   6
  -9   4   8 4754.74 756.077   6
  -9   4   7 10403.6 1165.60   7
  -9  -4   7 13288.0 1356.22   6
  -9   4   7 11863.1 1131.09   3
  -9   4   6 975.197 459.848   7
  -9   4   6 1374.79 494.081   3
  -9  -4   5 35068.1 2059.46   6
  -9   4   5 34048.9 1908.27   3
  -9   4   4 14767.5 1265.26   7
  -9  -4   4 15395.2 1402.24   6
  -9   4   4 15256.1 1301.37   3
  -9   4   3 6748.56 830.284   7
  -9  -4   3 7903.79 1028.96   6
  -9   4   3 7684.08 978.139   3
  -9   4   2 1214.68 445.756   7
  -9  -4   2 1747.52 683.661   6
  -9   4   2 716.295 547.083   3
  -9   4   1 39470.5 1845.88   7
  -9  -4   1 44225.7 2176.56   6
  -9   4   1 41872.5 2176.59   3
  -9  -4   1 40948.9 2187.51   5
  -9   4   1 35870.1 1592.69   5
  -9   4   0 2582.84 513.213   5
  -9   4   0 2406.36 492.310   7
   9   4   0 3499.47 547.178   4
  -9   4   0 4011.98 786.184   3
  -9  -4   0 3385.92 764.703   5
   9   4   1 38514.4 1776.22   4
  -9   4  -1 35696.0 1595.67   7
  -9   4  -1 39462.6 2141.96   3
  -9  -4  -1 35298.5 2006.38   5
  -9   4  -1 36832.7 1720.55   5
   9   4   2 27604.8 1547.53   4
  -9   4  -2 31279.3 1892.06   3
  -9  -4  -2 25182.9 1704.95   5
  -9   4  -2 26804.3 1507.58   5
  -9   4  -3 649.725 445.763   5
   9   4   3 322.045 387.946   4
  -9   4  -3-264.686 522.761   3
  -9  -4  -3-454.992 538.743   5
  -9  -4  -4 7458.35 1001.39   5
  -9   4  -4 7942.89 912.446   5
   9   4   4 7062.25 923.885   4
  -9   4  -4 6768.13 981.655   3
   9   4   5 20796.0 1558.87   4
  -9   4  -5 22417.6 1643.24   3
  -9  -4  -5 22658.8 1694.83   5
  -9   4  -5 20676.6 1521.67   5
   9   4   6 38238.2 2243.74   4
  -9   4  -6 41375.3 2259.64   3
  -9  -4  -6 36858.7 2264.54   5
  -9  -4  -7 5249.86 1060.01   5
   9   4   7 2969.15 716.525   4
  -9   4  -7 5395.87 1076.95   1
  -9   4  -7 4138.54 783.481   3
   9   4   8 33443.3 2259.46   4
  -9   4  -8 34389.2 2052.86   3
  -9   4  -8 38076.9 2353.29   1
  -9  -4  -8 30874.6 2203.97   5
   9   4   9 15625.9 1613.11   4
  -9   4  -9 16542.5 1438.29   3
  -9   4  -9 19469.2 1747.64   1
  -9  -4  -9 20565.8 1886.81   5
  -9  -4 -10 1205.39 734.822   5
   9   4  10 1685.43 760.087   4
  -9   4 -10 2303.10 832.979   1
  -9  -4 -11 2728.06 977.855   5
   9   4  11 3130.18 963.532   4
  -9   4 -11 3129.92 898.823   1
  -9   4 -12 9750.88 1474.50   1
  -9  -4 -12 11132.8 1588.05   5
   9   4  12 9791.06 1421.85   4
  -9  -4 -12 8359.77 1312.26   1
  -9   4 -13 1224.61 899.929   1
   9   4  13 2130.96 842.239   4
  -9  -4 -13 1114.18 751.363   1
  -9   5  12 3177.63 894.989   7
  -9  -5  12 1852.19 662.095   6
  -9   5  11 582.819 495.671   7
  -9  -5  11-628.733 705.788   6
  -9   5  10 19241.2 1810.09   7
  -9  -5  10 23155.1 1889.90   6
  -9   5   9 786.936 477.776   3
  -9   5   9 202.294 423.272   7
  -9  -5   9-346.587 596.731   6
  -9   5   8 7538.01 963.224   3
  -9   5   8 7592.73 1111.34   7
  -9  -5   8 8584.76 1140.68   6
  -9   5   7 2638.05 648.878   3
  -9   5   7 2739.48 756.795   7
  -9  -5   7 2976.39 784.777   6
  -9   5   6 13183.5 1351.94   7
  -9  -5   6 14225.9 1402.51   6
  -9   5   6 13692.8 1246.72   3
  -9   5   5 1195.36 597.836   3
  -9   5   5 519.548 451.642   7
  -9  -5   5 570.657 601.857   6
  -9   5   4 8906.51 1010.56   7
  -9  -5   4 9005.05 1127.52   6
  -9   5   4 9156.37 1022.80   3
  -9   5   3 2814.98 624.340   7
  -9  -5   3 2624.89 741.833   6
  -9   5   3 1603.70 611.886   3
  -9   5   2 19023.6 1369.95   7
  -9  -5   2 15202.0 1381.11   6
  -9   5   2 19707.6 1511.02   3
  -9   5   1 6977.51 843.422   7
  -9  -5   1 7167.55 933.283   6
  -9  -5   1 8439.34 1091.87   5
  -9   5   1 8478.36 1047.52   3
  -9   5   0 29481.1 1607.77   7
  -9   5   0 32523.4 1961.74   3
  -9  -5   0 30477.8 1919.39   5
  -9   5  -1 983.354 386.870   7
   9   5   1 556.564 371.458   4
  -9  -5  -1 1053.61 600.471   5
  -9   5  -1 1878.67 624.214   3
   9   5   2 844.059 443.565   4
  -9  -5  -2 276.223 576.809   5
  -9   5  -2-484.598 493.229   3
   9   5   3 1381.12 483.206   4
  -9  -5  -3 2351.34 711.378   5
  -9   5  -3 2209.97 692.778   3
   9   5   4 57196.5 2650.33   4
  -9   5  -4 56975.0 2717.01   3
  -9  -5  -4 60686.6 2807.54   5
  -9  -5  -5 401.545 671.304   5
  -9   5  -5 215.687 555.077   1
   9   5   5-925.304 531.370   4
  -9   5  -5-324.895 516.111   3
   9   5   6 36661.8 2271.41   4
  -9   5  -6 41313.2 2326.74   1
  -9   5  -6 40785.3 2278.73   3
  -9  -5  -6 35679.3 2259.87   5
  -9   5  -7 75.1488 415.999   3
  -9  -5  -7 1155.77 737.816   5
   9   5   7 1234.11 662.383   4
  -9   5  -7 1392.53 701.763   1
  -9   5  -8 2138.38 694.325   3
  -9  -5  -8 2620.50 811.453   5
   9   5   8 2051.66 731.221   4
  -9   5  -8 2121.83 699.325   1
  -9   5  -9 813.366 606.103   3
  -9  -5  -9 978.769 682.328   5
   9   5   9 114.822 619.246   4
  -9   5  -9-729.811 633.709   1
   9   5  10 25595.9 2180.23   4
  -9   5 -10 32181.1 2392.26   1
  -9  -5 -10 30226.6 2303.90   5
  -9   5 -11 340.109 657.149   1
  -9  -5 -11 727.530 703.419   5
   9   5  11 1133.04 774.967   4
   9   5  12 15109.2 1785.30   4
  -9  -5 -12 17822.4 1754.51   1
  -9   5 -12 21002.6 2088.33   1
  -9  -5 -12 20846.6 2078.38   5
  -9  -5 -13 1014.06 722.087   1
  -9   6  11 2156.68 777.792   7
  -9  -6  11 2845.29 982.094   6
  -9   6  10 833.830 626.432   7
  -9  -6  10 201.576 627.842   6
  -9   6   9-238.763 389.597   3
  -9   6   9-564.850 572.202   7
  -9  -6   9-36.8776 665.665   6
  -9   6   8 22689.4 1875.71   7
  -9  -6   8 22832.6 1782.54   6
  -9   6   8 21502.4 1595.76   3
  -9   6   7 1529.67 620.999   3
  -9   6   7 1179.64 600.853   7
  -9  -6   7 2905.66 740.857   6
  -9   6   6 14127.3 1428.37   7
  -9   6   6 12352.5 1257.99   3
  -9  -6   6 11569.6 1267.76   6
  -9   6   5 2475.76 684.731   3
  -9   6   5 2247.27 667.907   7
  -9  -6   5 2398.21 781.626   6
  -9   6   4 2189.83 677.464   3
  -9   6   4 2626.50 650.968   7
  -9  -6   4 2814.29 770.611   6
  -9   6   3 1400.84 517.345   3
  -9   6   3 1859.63 600.290   7
  -9  -6   3 2100.88 762.254   6
  -9   6   2 21284.8 1551.79   7
  -9  -6   2 24824.9 1780.99   6
  -9   6   2 23951.1 1727.73   3
  -9   6   1 13074.3 1187.46   7
  -9  -6   1 15067.2 1374.47   6
  -9   6   1 14920.1 1386.45   3
  -9  -6   1 13209.6 1335.66   5
  -9   6   0 1017.44 597.658   3
  -9   6   0 967.801 422.850   7
  -9  -6   0 208.829 527.588   5
  -9   6  -1 2971.45 786.977   3
  -9   6  -1 2156.15 541.041   7
   9   6   1 1351.52 514.227   4
  -9  -6  -1 2281.16 686.878   5
   9   6   2 36863.9 2076.92   4
  -9   6  -2 36174.8 2189.02   3
  -9  -6  -2 34928.5 2069.39   5
  -9   6  -3 3098.04 783.794   3
  -9   6  -3 1823.51 563.597   1
   9   6   3 2369.62 713.346   4
  -9  -6  -3 2302.31 715.152   5
  -9   6  -4 6122.90 1003.56   3
  -9   6  -4 5642.57 899.654   1
   9   6   4 5750.94 925.708   4
  -9  -6  -4 6148.18 970.686   5
  -9  -6  -5 6590.41 1008.93   5
  -9   6  -5 8293.03 1147.03   3
   9   6   5 8185.21 1101.85   4
  -9   6  -5 8281.68 1043.80   1
  -9  -6  -6 9619.86 1262.29   5
  -9   6  -6 9585.00 1225.71   3
   9   6   6 8500.71 1187.95   4
  -9   6  -6 10625.7 1221.82   1
  -9  -6  -7 3903.81 926.092   5
  -9   6  -7 4723.78 882.943   3
   9   6   7 3944.28 823.569   4
  -9   6  -7 6319.94 1062.43   1
   9   6   8 35490.8 2490.61   4
  -9   6  -8 38024.8 2344.98   3
  -9   6  -8 39714.4 2460.37   1
  -9  -6  -8 40396.6 2562.39   5
  -9   6  -9 3332.47 892.293   1
  -9  -6  -9 3364.65 981.994   5
  -9   6  -9 3617.91 947.106   3
   9   6   9 2609.50 830.667   4
  -9  -6 -10 689.335 746.155   5
  -9   6 -10 1282.26 775.649   1
   9   6  10 1426.14 799.136   4
  -9  -6 -11 1512.81 759.912   5
  -9   6 -11 1234.77 745.688   1
   9   6  11 2407.78 860.234   4
  -9  -6 -12 13796.0 1622.93   5
  -9  -6 -12 11596.0 1401.54   1
   9   6  12 13500.2 1710.72   4
  -9   6 -12 10924.8 1584.24   1
  -9  -6 -13 808.113 688.347   1
  -9   7  10 10675.3 1446.73   7
  -9  -7  10 9253.81 1290.87   6
  -9   7   9 11458.1 1459.12   7
  -9  -7   9 12509.4 1419.81   6
  -9   7   8 5733.44 957.752   3
  -9   7   8 3718.09 929.947   7
  -9  -7   8 5090.62 999.236   6
  -9   7   7 15924.4 1624.41   7
  -9  -7   7 19457.8 1691.30   6
  -9   7   7 21262.1 1648.24   3
  -9   7   6 3318.42 803.169   3
  -9   7   6 3424.41 823.376   7
  -9  -7   6 4185.43 947.973   6
  -9   7   5 848.057 506.457   3
  -9   7   5 884.275 602.598   7
  -9  -7   5 568.593 590.526   6
  -9   7   4 2390.91 720.108   3
  -9   7   4 2558.63 647.662   7
  -9  -7   4 2594.04 744.764   6
  -9   7   3 32113.9 2080.01   7
  -9  -7   3 34694.7 2123.54   6
  -9   7   3 35167.5 2151.22   3
  -9   7   2 218.853 527.574   3
  -9   7   2-441.459 467.510   7
  -9  -7   2 29.6401 565.625   6
  -9   7   1 24846.3 1707.25   7
  -9  -7   1 25430.9 1741.04   6
  -9   7   1 29952.1 1999.60   3
  -9  -7   1 28664.8 1962.52   5
  -9   7   0 9358.17 1184.96   3
  -9   7   0 9907.50 1072.98   7
  -9  -7   0 12283.0 1291.18   5
  -9   7  -1 3424.57 948.890   3
   9   7   1 3819.65 778.132   4
  -9  -7  -1 3574.61 775.135   5
  -9   7  -2 2270.72 798.432   3
   9   7   2 1236.08 521.208   4
  -9  -7  -2 1180.85 670.415   5
   9   7   3 16414.1 1522.80   4
  -9   7  -3 17212.7 1589.73   3
  -9   7  -4 9302.25 1166.85   3
   9   7   4 9669.29 1251.80   4
  -9   7  -4 11140.4 1112.51   1
  -9  -7  -4 9006.34 1166.83   5
  -9  -7  -5 2736.70 776.580   5
  -9   7  -5 3411.02 837.662   3
   9   7   5 3880.66 917.172   4
  -9   7  -5 3810.26 852.925   1
   9   7   6 15444.4 1635.44   4
  -9   7  -6 14879.7 1492.55   3
  -9   7  -6 14892.6 1449.38   1
  -9  -7  -6 15458.8 1527.44   5
  -9   7  -7 4489.49 950.826   1
  -9  -7  -7 3348.96 905.182   5
  -9   7  -7 3949.42 946.463   3
   9   7   7 4005.37 961.777   4
  -9  -7  -8 273.924 589.131   5
  -9   7  -8-351.856 547.844   3
  -9   7  -8-51.5121 535.279   1
   9   7   8 755.707 596.590   4
  -9  -7  -9 3860.36 1024.51   5
  -9   7  -9 3232.14 856.405   3
  -9   7  -9 2823.88 830.147   1
   9   7   9 4957.42 1073.46   4
  -9  -7 -10 5466.13 1133.59   5
   9   7  10 6235.37 1264.32   4
  -9   7 -10 6612.74 1212.75   1
  -9  -7 -11 3595.64 1078.86   5
   9   7  11 394.236 648.912   4
  -9   7 -11 2882.02 888.980   1
  -9  -8  10-339.776 675.140   6
  -9   8   9 6236.41 1132.59   7
  -9  -8   9 7376.25 1204.74   6
  -9   8   8-73.4684 514.183   3
  -9   8   8 784.682 534.552   7
  -9  -8   8 1018.95 752.097   6
  -9   8   7 7043.32 1080.37   3
  -9   8   7 6408.13 1115.37   7
  -9  -8   7 5316.86 972.320   6
  -9   8   6 23.4683 525.765   3
  -9   8   6 418.973 553.189   7
  -9  -8   6-292.005 537.788   6
  -9   8   5 27269.0 2087.31   7
  -9  -8   5 29870.9 2053.31   6
  -9   8   5 29747.8 2048.33   3
  -9   8   4 109.055 458.438   3
  -9   8   4-99.2730 506.008   7
  -9  -8   4 924.728 695.929   6
  -9   8   3 854.595 631.981   3
  -9   8   3 281.863 574.863   7
  -9  -8   3 157.679 531.697   6
  -9   8   2 1019.08 657.997   3
  -9   8   2 729.324 533.392   7
  -9  -8   2 69.0015 483.892   6
  -9  -8   2 668.922 521.630   5
  -9   8   1 10378.2 1263.70   3
  -9   8   1 9762.56 1131.17   7
  -9  -8   1 11762.2 1223.69   6
  -9  -8   1 9586.71 1169.12   5
  -9   8   0 2222.20 787.523   3
  -9  -8   0 1748.24 735.537   5
  -9   8  -1 35756.3 2345.28   3
  -9  -8  -1 38238.5 2234.36   5
  -9   8  -2 2587.50 808.843   3
   9   8   2 947.493 520.971   4
  -9  -8  -2 1439.20 681.594   5
  -9   8  -3 968.783 706.620   3
   9   8   3 985.045 637.185   4
  -9  -8  -3 925.960 613.002   5
  -9  -8  -4 285.876 612.134   5
  -9   8  -4-407.946 670.396   3
   9   8   4 179.649 494.881   4
   9   8   5 18874.3 1791.48   4
  -9   8  -5 20996.6 1836.90   3
  -9  -8  -5 20796.3 1750.44   5
  -9  -8  -6 1804.67 651.062   5
  -9   8  -6 18.4415 619.718   3
   9   8   6 1756.87 747.747   4
  -9  -8  -7-52.6057 469.489   5
  -9   8  -7-332.691 685.717   3
   9   8   7-27.7340 583.491   4
  -9  -8  -8 359.060 597.988   5
  -9   8  -8 258.431 660.198   3
  -9   8  -8 1035.04 664.398   1
  -9  -8  -9 3438.69 1015.82   5
  -9   8  -9 1068.86 720.009   3
  -9   8  -9 2114.08 776.020   1
  -9  -8 -10 36.5496 657.024   5
   9   8  10-628.797 612.152   4
  -9   8 -10 65.8854 676.299   1
  -9  -9   9 2849.45 913.410   6
  -9   9   8 70.7404 508.074   3
  -9   9   8 1166.43 645.757   7
   9   9  -8-224.321 588.480   2
  -9  -9   8 435.140 653.824   6
  -9   9   7 7102.37 1117.99   3
  -9   9   7 5121.58 1009.39   7
   9   9  -7 5283.65 1079.02   2
  -9  -9   7 5141.40 980.096   6
  -9   9   6 3446.33 871.153   3
  -9   9   6 3461.36 970.219   7
  -9  -9   6 4306.95 964.567   6
  -9   9   5 371.930 515.266   3
  -9   9   5 1356.05 634.214   7
  -9  -9   5 309.961 638.903   6
  -9   9   4 4296.08 974.716   3
  -9   9   4 3512.39 928.346   7
  -9  -9   4 5723.48 960.041   6
  -9   9   3 20361.8 1847.43   7
  -9  -9   3 25265.7 1867.61   6
  -9   9   3 23606.6 1928.45   3
  -9   9   2 248.718 582.044   3
  -9   9   2-186.911 492.136   7
  -9  -9   2 242.973 562.588   6
  -9  -9   2 453.326 690.541   5
  -9   9   1 8032.88 1174.83   3
  -9  -9   1 6917.44 1052.12   5
  -9   9   0 3897.30 920.572   3
  -9  -9   0 4312.51 818.966   5
[truncated: 68,849 more chars]
